# Supplementary material for: Hippocampal and cortical mechanisms at retrieval explain variability in episodic remembering in older adults
Source: eLife. 2020 May 29;9:e55335. doi: 10.7554/eLife.55335 (PMC7259949; doi:10.7554/eLife.55335)
Supplement: Figure 3—source data 1. [file elife-55335-fig3-data1.csv]

Subject	age	gender	yrs_educ	mmse	associative_dprime	exemplar_specific_recall	old_new_dprime
am100	62	Female	16	30	2.131351315	0.395833333	3.137781126
am104	76	Female	12	29	0.932796821	0.041666667	1.624309989
am105	69	Male	18	30	1.483703864	0.041666667	1.931964196
am106	61	Female	20	30	1.231949549	0.208333333	1.949350744
am107	63	Male	18	30	0.932796821	0.083333333	1.718953201
am109	73	Female	16	29	1.651953588	0.233333333	1.861257314
am110	65	Male	18	30	1.447072298	0.358333333	1.905357954
am113	61	Female	16	30	2.733394628	0.433333333	3.238001683
am114	63	Female	20	30	3.130911877	0.683333333	3.679532237
am115	73	Female	12	30	0.956453879	0.216666667	2.163659469
am116	68	Female	16	30	2.835323944	0.3	2.270986857
am117	68	Female	16	28	2.307691625	0.533333333	2.66368276
am118	77	Male	18	28	1.873534182	0.383333333	2.460499788
am121	65	Female	16	30	1.553498847	0.183333333	2.081520412
am122	64	Female	20	29	2.156782229	0.525	2.536167536
am124	74	Male	16	30	2.016580713	0.158333333	1.592229046
am125	68	Female	16	29	1.702141344	0.15	1.983354515
am127	68	Male	20	26	0.798229096	0.05	1.639980192
am129	80	Male	19	28	-0.278837251	0.016666667	0.890416252
am131	69	Female	18	28	2.141198121	0.275	2.35719894
am132	61	Male	17	30	1.764463203	0.3	2.749566247
am133	62	Female	16	30	0.73190342	0.15	1.591800693
am134	71	Female	16	29	-0.097650771	0	0.943158893
am135	60	Female	16	29	2.457114321	0.433333333	2.168414385
am136	68	Female	18	30	1.329601291	0.241666667	1.942963517
am138	71	Female	19	28	1.546268615	0.391666667	2.235338315
am139	75	Female	18	29	2.087639728	0.008333333	1.961052119
am140	70	Female	20	29	0.568121523	0.091666667	0.861676811
am143	68	Female	16	28	2.478967231	0.641666667	2.460499788
am145	68	Male	18	30	2.121477126	0.458333333	2.10660885
am146	76	Female	16	28	1.008203362	0.25	1.226665719
am147	74	Male	16	30	2.590945559	0.275	2.66368276
am148	61	Female	12	29	1.468757245	0.166666667	2.070478741
am149	60	Female	16	28	1.462440658	0.2	1.986779089
am150	66	Female	18	29	2.553616097	0.566666667	3.35131924
am152	66	Male	18	28	1.176453087	0.233333333	1.503933298
am153	63	Female	16	29	1.593008699	0.558333333	2.115239283
am158	75	Female	12	30	2.157949383	0.229166667	2.574941329
am161	65	Male	16	28	1.462440658	0.558333333	1.778918522
am162	62	Male	18	30	0.866583716	0.375	1.447948807
am163	64	Male	20	29	1.528929189	0.239583333	2.392718128
am164	62	Female	20	30	1.933345407	0.3	2.553616097
am166	62	Male	18	28	2.017812746	0.35	2.685179109
am167	73	Male	16	28	1.132025428	0	1.64777645
am168	70	Female	20	30	1.673392858	0.375	2.01042488
am169	75	Male	20	30	0.92524456	0.191666667	1.26301367
am170	60	Male	17	29	3.925465888	0.841666667	4.782268178
am171	60	Female	16	30	1.968431452	0.325	2.576558534
am172	71	Female	16	29	1.366484472	0.066666667	1.730884651
am173	62	Female	16	28	2.508531532	0.510416667	2.910275406
am175	63	Male	14	30	2.037432528	0.483333333	1.754744816
am176	72	Male	18	30	1.593207899	0.358333333	2.418287571
am177	74	Male	18	27	0.695360442	0.008333333	1.532888186
am180	65	Female	18	28	2.182641854	0.125	2.068747193
am181	64	Female	18	30	1.173935786	0.483333333	1.591800693
am182	76	Female	16	29	2.233543035	0.3	2.535060627
am183	69	Female	18	30	2.148603656	0.516666667	2.390458817
am184	65	Male	16	30	1.691450683	0.208333333	1.932534375
am185	64	Female	18	30	1.848234543	0.375	2.460499788
am186	69	Male	16	30	2.065054342	0.316666667	2.346654606
am187	64	Female	16	30	2.464540696	0.458333333	2.711079728
am188	63	Female	16	29	2.43541126	0.425	2.424851245
am189	75	Female	16	29	2.235338315	0.341666667	2.995499898
am190	62	Female	18	28	1.577738808	0.15	1.700459529
am191	67	Female	18	28	1.879234263	0.366666667	2.472563299
am192	72	Male	12	29	1.145310152	0.258333333	1.49564741
am193	66	Female	16	30	1.494204107	0.183333333	1.731760819
am194	70	Male	18	29	1.167325583	0.075	2.025803287
am195	65	Male	14	28	1.729087645	0.225	2.143464259
am196	65	Female	20	29	1.424608727		1.983354515
am20	75	Female	18	30	2.708884512	0.458333333	3.097652
am200	60	Female	18	29	1.320062518	0.085365854	1.746720629
am202	60	Female	18	29	2.073700645	0.366666667	2.685179109
am203	62	Female	18	29	2.945041206	0.525	2.497548623
am29	75	Male	16	29	2.133486732	0.183333333	2.878917309
am30	66	Male	16	28	0.567947087	0.008333333	1.46177096
am35	68	Female	15	30	1.062975951	0.108333333	1.729087645
am36	64	Male	18	30	2.758265805	0.525	3.200952848
am41	65	Male	16	29	0.362321103	0.066666667	1.209042769
am44	64	Female	18	30	2.058239319	0.358333333	3.317011594
am45	81	Female	15	29	1.078131647	0.008333333	1.262937699
am46	67	Male	14	27	1.170860944	0.05	1.89682968
am58	70	Male	18	30	1.825281921	0.2	2.553616097
am60	82	Male	20	28	1.593207899	0.225	1.959090726
am63	63	Female	18	29	1.421462479	0.575	1.398769063
am65	64	Female	16	29	1.483879928	0.216666667	1.889934198
am70	66	Female	16	30	1.598509742	0.683333333	1.223907732
am73	75	Male	18	29	0.601939144	0.1	1.69062163
am77	77	Male	18	30	0.405877074	0.008333333	1.137272408
am78	68	Female	16	28	1.447072298	0.5625	1.759222353
am80	70	Female	16	30	2.381429675	0.425	2.553616097
am84	62	Male	16	29	2.945041206	0.758333333	3.35131924
am85	69	Male	18	30	-0.002011512	0.008333333	1.094866182
am90	74	Female	16	29	1.072967897	0.316666667	1.818398475
am93	67	Male	16	29	1.213208129	0.266666667	1.155128677
am94	73	Female	14	28	1.827687179	0.116666667	2.460499788
am95	74	Male	18	29	1.338557192	0.725	1.338557192
am96	78	Female	16	27	0.294213139	0.125	1.19844397
am97	72	Female	12	29	1.684021252	0.375	2.418287571
am98	67	Female	16	29	2.349861867	0.275	2.720452337
