# Supplementary material for: Hippocampal and cortical mechanisms at retrieval explain variability in episodic remembering in older adults
Source: eLife. 2020 May 29;9:e55335. doi: 10.7554/eLife.55335 (PMC7259949; doi:10.7554/eLife.55335)
Supplement: Figure 4—source data 1. [file elife-55335-fig4-data1.csv]

Subject	Region	Trial Type	Acc	Logit
am100	ANG	Assoc Hit	0.771694973	2.004708188
am100	ANG	Item Hit	0.616572318	0.497339139
am100	ANG	Item Miss	0.380461206	-0.496380347
am104	ANG	Assoc Hit	0.601109982	0.485240068
am104	ANG	Assoc Miss	0.485258533	0.264962427
am104	ANG	Item Miss	0.682359982	1.255464486
am105	ANG	Assoc Hit	0.548866548	0.753646873
am105	ANG	Assoc Miss	0.569454784	0.432344544
am105	ANG	Item Hit	0.650407165	0.819675563
am106	ANG	Assoc Hit	0.894014782	2.619825107
am106	ANG	Assoc Miss	0.48944019	0.026758358
am106	ANG	Item Miss	0.385273524	-0.640916486
am107	ANG	Assoc Hit	0.726285363	1.012383473
am107	ANG	Assoc Miss	0.418204555	-0.121355781
am107	ANG	Item Hit	0.624238579	1.114639287
am109	ANG	Assoc Hit	0.67344065	1.584275472
am109	ANG	Assoc Miss	0.51431059	0.134236989
am109	ANG	Item Miss	0.580977257	0.287154519
am110	ANG	Assoc Hit	0.812616089	2.782751905
am110	ANG	Item Hit	0.480076406	-0.330906504
am110	ANG	Item Miss	0.476036002	-0.446178421
am113	ANG	Assoc Hit	0.714553582	1.91792379
am113	ANG	Assoc Miss	0.568754124	0.058156081
am113	ANG	Item Miss	0.485420791	0.02958711
am114	ANG	Assoc Hit	0.589576166	0.66855566
am115	ANG	Assoc Hit	0.72060748	1.455220737
am115	ANG	Assoc Miss	0.458544851	-0.118109417
am116	ANG	Assoc Hit	0.728907051	1.534875629
am116	ANG	Item Miss	0.45024528	-0.197764309
am117	ANG	Assoc Hit	0.71527061	2.151942519
am117	ANG	Item Hit	0.48402061	-0.089000345
am117	ANG	Item Miss	0.569437277	-0.057275194
am118	ANG	Assoc Hit	0.750158176	2.121005139
am118	ANG	Assoc Miss	0.432896271	-0.452373588
am118	ANG	Item Miss	0.585674049	0.33703543
am121	ANG	Assoc Hit	0.701405513	1.759692652
am121	ANG	Assoc Miss	0.660035118	0.616465068
am121	ANG	Item Miss	0.407287866	-0.370490739
am122	ANG	Assoc Hit	0.795431647	2.602308452
am122	ANG	Assoc Miss	0.437624338	-0.225960794
am122	ANG	Item Hit	0.687624338	0.458583058
am122	ANG	Item Miss	0.437624338	-0.160708076
am124	ANG	Assoc Hit	0.827338575	2.759690973
am124	ANG	Assoc Miss	0.44205719	-0.622442768
am124	ANG	Item Hit	0.499332732	-0.131581226
am125	ANG	Assoc Hit	0.716394157	1.3508047
am125	ANG	Assoc Miss	0.381598836	-0.255944791
am125	ANG	Item Hit	0.434268389	0.119714567
am125	ANG	Item Miss	0.82604328	1.459648164
am127	ANG	Assoc Hit	0.8036611	2.138527012
am127	ANG	Assoc Miss	0.561236858	0.658179426
am127	ANG	Item Hit	0.51361781	-0.165384911
am127	ANG	Item Miss	0.479788894	0.042901113
am129	ANG	Assoc Hit	0.739340807	1.30910766
am129	ANG	Assoc Miss	0.481237359	0.347938447
am129	ANG	Item Miss	0.548150331	0.348620874
am131	ANG	Assoc Hit	0.939587147	2.972172358
am131	ANG	Assoc Miss	0.463544366	0.634447447
am131	ANG	Item Hit	0.583674237	0.339883812
am131	ANG	Item Miss	0.371498912	-1.272280977
am132	ANG	Assoc Hit	0.793603508	2.042397668
am132	ANG	Item Hit	0.385548823	-0.705286348
am133	ANG	Assoc Hit	0.688301656	2.082044484
am133	ANG	Assoc Miss	0.48771342	0.03729917
am133	ANG	Item Miss	0.59271342	-0.113676674
am134	ANG	Assoc Hit	0.541773621	0.36531643
am134	ANG	Assoc Miss	0.828312082	1.536706778
am134	ANG	Item Hit	0.502000894	0.232347938
am134	ANG	Item Miss	0.486218065	0.539851494
am135	ANG	Assoc Hit	0.785708384	1.524302378
am135	ANG	Item Hit	0.393443947	-0.187191058
am136	ANG	Assoc Hit	0.880269665	2.284692006
am136	ANG	Assoc Miss	0.406034971	-0.72222121
am136	ANG	Item Miss	0.48242386	0.443196183
am138	ANG	Assoc Hit	0.927398837	2.602245247
am138	ANG	Assoc Miss	0.432028466	0.183992205
am138	ANG	Item Hit	0.409301194	-0.780570471
am139	ANG	Assoc Hit	0.670335969	0.62350674
am139	ANG	Assoc Miss	0.395989564	-0.139319366
am139	ANG	Item Hit	0.520989564	1.125190256
am139	ANG	Item Miss	0.770989564	1.06484501
am140	ANG	Assoc Hit	0.601745478	1.046906316
am140	ANG	Assoc Miss	0.440634367	0.057918785
am140	ANG	Item Miss	0.726348652	0.900841879
am143	ANG	Assoc Hit	0.730821957	2.197820747
am143	ANG	Item Hit	0.484862361	-0.058565256
am143	ANG	Item Miss	0.553044179	-0.13358851
am145	ANG	Assoc Hit	0.656327866	1.504617298
am145	ANG	Item Hit	0.522824465	-0.167505978
am146	ANG	Assoc Hit	0.660156974	1.354107747
am146	ANG	Item Hit	0.552202428	0.577373652
am146	ANG	Item Miss	0.556369095	0.074185581
am147	ANG	Assoc Hit	0.781476032	1.973606958
am147	ANG	Assoc Miss	0.478471496	0.409902194
am147	ANG	Item Hit	0.397663416	-0.689746746
am147	ANG	Item Miss	0.700693719	0.980460234
am148	ANG	Assoc Hit	0.698951166	1.249094693
am148	ANG	Assoc Miss	0.480201166	0.088016627
am149	ANG	Assoc Hit	0.756122582	1.399876784
am149	ANG	Assoc Miss	0.631302957	0.748617794
am149	ANG	Item Miss	0.381302957	-0.142827598
am150	ANG	Assoc Hit	0.757199465	2.235213645
am150	ANG	Assoc Miss	0.421952866	-0.898102325
am152	ANG	Assoc Hit	0.748724716	1.541832642
am152	ANG	Assoc Miss	0.818471093	1.552380786
am152	ANG	Item Hit	0.268471093	-0.417539425
am152	ANG	Item Miss	0.52263776	-0.002451363
am153	ANG	Assoc Hit	0.766242832	2.765241239
am153	ANG	Assoc Miss	0.334576166	-1.071089436
am153	ANG	Item Miss	0.667909499	0.311515177
am158	ANG	Assoc Hit	0.589576166	0.66855566
am161	ANG	Assoc Hit	0.712303438	1.750581184
am161	ANG	Assoc Miss	0.466848893	-0.413469863
am162	ANG	Assoc Hit	0.800453251	2.216238062
am162	ANG	Assoc Miss	0.483740797	0.211590649
am162	ANG	Item Miss	0.484534448	-0.422161731
am163	ANG	Assoc Hit	0.716907739	1.362608683
am163	ANG	Assoc Miss	0.54767697	0.140592077
am163	ANG	Item Hit	0.575454748	0.632093154
am163	ANG	Item Miss	0.518265205	0.538928726
am164	ANG	Assoc Hit	0.775122753	1.735058703
am164	ANG	Assoc Miss	0.519124301	0.483033262
am164	ANG	Item Miss	0.474481443	-0.212424985
am166	ANG	Assoc Hit	0.808370492	2.119583126
am166	ANG	Assoc Miss	0.370781839	-0.782471806
am167	ANG	Assoc Hit	0.717897422	1.11961397
am167	ANG	Assoc Miss	0.414998871	-0.042968312
am167	ANG	Item Miss	0.635832204	0.929021322
am168	ANG	Assoc Hit	0.701079126	2.558493792
am168	ANG	Assoc Miss	0.685405145	1.005094724
am168	ANG	Item Hit	0.513687973	0.357771679
am168	ANG	Item Miss	0.458132418	-1.247137554
am169	ANG	Assoc Hit	0.818095834	1.934119818
am169	ANG	Assoc Miss	0.407381549	-0.295490033
am169	ANG	Item Miss	0.543251114	0.367037194
am170	ANG	Assoc Hit	0.589576166	0.66855566
am171	ANG	Assoc Hit	0.855301986	2.873349642
am171	ANG	Assoc Miss	0.430198104	-0.466190439
am171	ANG	Item Miss	0.483228407	-0.401492223
am172	ANG	Assoc Hit	0.541023411	0.470146848
am172	ANG	Assoc Miss	0.484145104	0.189602739
am172	ANG	Item Hit	0.753986374	1.538037386
am172	ANG	Item Miss	0.579149773	0.476435668
am173	ANG	Assoc Hit	0.589576166	0.66855566
am175	ANG	Assoc Hit	0.800830429	1.618552222
am175	ANG	Item Hit	0.51966332	0.696409972
am175	ANG	Item Miss	0.448234748	-0.309295214
am176	ANG	Assoc Hit	0.806527462	2.163914052
am176	ANG	Item Miss	0.372624869	-0.826802732
am177	ANG	Assoc Hit	0.624849572	0.783450495
am177	ANG	Assoc Miss	0.631845423	0.725451919
am177	ANG	Item Hit	0.469703643	0.743979386
am177	ANG	Item Miss	0.631906024	0.42134084
am180	ANG	Assoc Hit	0.808161995	2.279718949
am180	ANG	Assoc Miss	0.763738032	0.738441346
am180	ANG	Item Hit	0.403618984	-0.079941208
am180	ANG	Item Miss	0.382785651	-0.263996446
am181	ANG	Assoc Hit	0.708846999	1.097725584
am181	ANG	Assoc Miss	0.470305332	0.239385736
am182	ANG	Assoc Hit	0.604254196	0.78610674
am182	ANG	Assoc Miss	0.574898135	0.55100458
am183	ANG	Assoc Hit	0.589576166	0.66855566
am184	ANG	Assoc Hit	0.593310993	1.219589725
am184	ANG	Item Hit	0.778184942	0.785382212
am184	ANG	Item Miss	0.397232561	0.000695042
am185	ANG	Assoc Hit	0.709766514	1.387690229
am185	ANG	Assoc Miss	0.578877795	0.153731283
am185	ANG	Item Hit	0.490782557	0.217974741
am185	ANG	Item Miss	0.578877795	0.914826387
am186	ANG	Assoc Hit	0.714666745	1.281893895
am186	ANG	Assoc Miss	0.905815814	1.450463544
am186	ANG	Item Hit	0.505815814	0.671954235
am186	ANG	Item Miss	0.23200629	-0.730089034
am187	ANG	Assoc Hit	0.503987582	0.012547239
am187	ANG	Item Hit	0.675164749	1.324564082
am188	ANG	Assoc Hit	0.756357301	1.877105882
am188	ANG	Item Hit	0.42279503	-0.539994562
am189	ANG	Assoc Hit	0.701733536	1.391971691
am189	ANG	Assoc Miss	0.477418795	-0.054860371
am190	ANG	Assoc Hit	0.759417435	1.592488621
am190	ANG	Assoc Miss	0.790369816	1.717824433
am190	ANG	Item Hit	0.434814261	0.111148126
am190	ANG	Item Miss	0.37370315	-0.747238539
am191	ANG	Assoc Hit	0.689226515	1.645232933
am191	ANG	Assoc Miss	0.489925816	-0.308121613
am192	ANG	Assoc Hit	0.680570961	1.291599649
am192	ANG	Assoc Miss	0.633131055	0.997698902
am192	ANG	Item Miss	0.45502648	-0.283631571
am193	ANG	Assoc Hit	0.711472787	1.513871531
am193	ANG	Item Hit	0.359671811	-0.309254235
am193	ANG	Item Miss	0.697583899	0.801049684
am194	ANG	Assoc Hit	0.708993746	1.436075702
am194	ANG	Assoc Miss	0.2291098	-1.35222525
am194	ANG	Item Hit	0.830624951	1.921816529
am195	ANG	Assoc Hit	0.589576166	0.66855566
am196	ANG	Assoc Hit	0.590044166	0.781791368
am196	ANG	Assoc Miss	0.475705802	0.482642474
am196	ANG	Item Miss	0.702978529	0.741233139
am20	ANG	Assoc Hit	0.648941245	0.940047624
am20	ANG	Assoc Miss	0.695607912	1.470494063
am20	ANG	Item Miss	0.42417934	-0.404874707
am200	ANG	Assoc Hit	0.696514366	1.285447946
am200	ANG	Assoc Miss	0.283427453	-0.464730377
am200	ANG	Item Hit	0.696125866	1.322361484
am200	ANG	Item Miss	0.682236977	0.531143587
am202	ANG	Assoc Hit	0.642357743	1.293847307
am202	ANG	Assoc Miss	0.536794588	0.043264014
am203	ANG	Assoc Hit	0.547209219	0.575480387
am203	ANG	Item Miss	0.631943112	0.761630933
am29	ANG	Assoc Hit	0.718533694	1.447140804
am29	ANG	Assoc Miss	0.979923656	1.808821958
am29	ANG	Item Hit	0.246590323	-0.12883184
am29	ANG	Item Miss	0.413256989	-0.452908281
am30	ANG	Assoc Hit	0.700294322	1.521744879
am30	ANG	Assoc Miss	0.554939676	0.575305847
am30	ANG	Item Hit	0.582717454	0.265289638
am30	ANG	Item Miss	0.52035321	0.311882276
am35	ANG	Assoc Hit	0.587213509	0.941425594
am35	ANG	Assoc Miss	0.521328341	0.128943474
am35	ANG	Item Hit	0.624937967	0.646385167
am35	ANG	Item Miss	0.624824845	0.957468406
am36	ANG	Assoc Hit	0.589576166	0.66855566
am41	ANG	Assoc Hit	0.842890006	1.865480658
am41	ANG	Assoc Miss	0.498445561	0.468240664
am41	ANG	Item Hit	0.42739293	-0.328054342
am44	ANG	Assoc Hit	0.718682899	1.07144998
am44	ANG	Item Hit	0.395856132	0.243061649
am44	ANG	Item Miss	0.654189466	0.691155351
am45	ANG	Assoc Hit	0.801173046	2.201121705
am45	ANG	Assoc Miss	0.444440698	0.036230955
am45	ANG	Item Hit	0.620631174	0.376547623
am45	ANG	Item Miss	0.492059745	0.060322357
am46	ANG	Assoc Hit	0.771425566	1.579480836
am46	ANG	Assoc Miss	0.585236755	0.475727683
am46	ANG	Item Hit	0.441297361	0.219780813
am46	ANG	Item Miss	0.56034498	0.399233309
am58	ANG	Assoc Hit	0.676692817	1.420944678
am58	ANG	Item Hit	0.497206651	0.220849958
am58	ANG	Item Miss	0.594829029	0.363872344
am60	ANG	Assoc Hit	0.66315225	1.242574974
am60	ANG	Assoc Miss	0.631684227	1.113761142
am60	ANG	Item Miss	0.473892019	-0.350669136
am63	ANG	Assoc Hit	0.589576166	0.66855566
am65	ANG	Assoc Hit	0.868508367	2.561251662
am65	ANG	Assoc Miss	0.349949808	-0.68592215
am65	ANG	Item Hit	0.550270321	0.130337469
am70	ANG	Assoc Hit	0.589576166	0.66855566
am73	ANG	Assoc Hit	0.688290694	1.813796119
am73	ANG	Assoc Miss	0.40926652	-0.547625689
am73	ANG	Item Hit	0.671171282	0.73949655
am77	ANG	Assoc Hit	0.672609675	1.04235196
am77	ANG	Assoc Miss	0.515202268	-0.004756557
am77	ANG	Item Hit	0.580916554	0.968071576
am78	ANG	Assoc Hit	0.506242832	0.755584839
am78	ANG	Item Hit	0.672909499	0.581526481
am80	ANG	Assoc Hit	0.724728995	2.418753795
am80	ANG	Item Miss	0.454423336	-1.081642475
am84	ANG	Assoc Hit	0.629193463	1.505349075
am84	ANG	Item Hit	0.549958868	-0.168237755
am85	ANG	Assoc Hit	0.755518195	1.924394702
am85	ANG	Assoc Miss	0.416025441	-0.20530908
am85	ANG	Item Miss	0.597184861	0.286581359
am90	ANG	Assoc Hit	0.794919068	1.831167696
am90	ANG	Assoc Miss	0.56266229	0.083671173
am90	ANG	Item Miss	0.411147138	0.090828111
am93	ANG	Assoc Hit	0.685187451	1.675477121
am93	ANG	Assoc Miss	0.49396488	-0.338365801
am94	ANG	Assoc Hit	0.61377492	1.176134738
am94	ANG	Assoc Miss	0.533104494	0.391587553
am94	ANG	Item Miss	0.621849083	0.437944688
am95	ANG	Assoc Hit	0.589576166	0.66855566
am96	ANG	Assoc Hit	0.681937277	1.452084573
am96	ANG	Assoc Miss	0.497215054	-0.114973253
am97	ANG	Assoc Hit	0.685427514	1.149045024
am97	ANG	Assoc Miss	0.681002339	1.213374124
am97	ANG	Item Hit	0.525158184	0.353384084
am97	ANG	Item Miss	0.466716625	-0.041580591
am98	ANG	Assoc Hit	0.715832562	2.214178907
am98	ANG	Assoc Miss	0.376194404	-0.421020493
am98	ANG	Item Hit	0.688694404	0.343218596
am98	ANG	Item Miss	0.577583293	0.53784563
am100	VTC	Assoc Hit	0.86583838	1.782954474
am100	VTC	Item Hit	0.621790761	0.48121849
am100	VTC	Item Miss	0.205124095	-1.248858163
am104	VTC	Assoc Hit	0.615579581	0.450884024
am104	VTC	Assoc Miss	0.532427407	-0.026444448
am104	VTC	Item Miss	0.544746248	0.590875224
am105	VTC	Assoc Hit	0.615978436	0.912350681
am105	VTC	Assoc Miss	0.569339781	-0.021271746
am105	VTC	Item Hit	0.507435019	0.124235866
am106	VTC	Assoc Hit	0.767873845	0.937568859
am106	VTC	Assoc Miss	0.556189696	0.238101525
am106	VTC	Item Miss	0.368689696	-0.160355583
am107	VTC	Assoc Hit	0.529677271	0.288542142
am107	VTC	Assoc Miss	0.663515654	0.523976298
am107	VTC	Item Hit	0.499560312	0.202796361
am109	VTC	Assoc Hit	0.602766726	0.841706049
am109	VTC	Assoc Miss	0.536659922	0.063262554
am109	VTC	Item Miss	0.553326589	0.110346198
am110	VTC	Assoc Hit	0.620062166	0.847166035
am110	VTC	Item Hit	0.469268515	-0.178501106
am110	VTC	Item Miss	0.603422556	0.346649872
am113	VTC	Assoc Hit	0.600746111	0.600332019
am113	VTC	Assoc Miss	0.546003563	-0.045598796
am113	VTC	Item Miss	0.546003563	0.460581578
am114	VTC	Assoc Hit	0.564251079	0.338438267
am115	VTC	Assoc Hit	0.688554818	0.857082163
am115	VTC	Assoc Miss	0.43994734	-0.180205629
am116	VTC	Assoc Hit	0.620486629	0.350931124
am116	VTC	Item Miss	0.508015529	0.32594541
am117	VTC	Assoc Hit	0.773973301	1.519940858
am117	VTC	Item Hit	0.623973301	0.132021092
am117	VTC	Item Miss	0.294806634	-0.636647149
am118	VTC	Assoc Hit	0.701486529	1.310384195
am118	VTC	Assoc Miss	0.5854151	0.442746043
am118	VTC	Item Miss	0.405851608	-0.737815437
am121	VTC	Assoc Hit	0.513753957	0.344963384
am121	VTC	Assoc Miss	0.6499392	0.399339843
am121	VTC	Item Miss	0.529060079	0.271011573
am122	VTC	Assoc Hit	0.91234078	2.423591057
am122	VTC	Assoc Miss	0.352983083	-0.42185844
am122	VTC	Item Hit	0.483935464	-0.438401873
am122	VTC	Item Miss	0.507744988	-0.209577677
am124	VTC	Assoc Hit	0.659484707	0.965857645
am124	VTC	Assoc Miss	0.546930594	-0.247730029
am124	VTC	Item Hit	0.486337936	0.297187185
am125	VTC	Assoc Hit	0.662792888	0.845160662
am125	VTC	Assoc Miss	0.434722713	-0.669089685
am125	VTC	Item Hit	0.641432669	0.462347215
am125	VTC	Item Miss	0.518056046	0.715334876
am127	VTC	Assoc Hit	0.509359688	0.352323751
am127	VTC	Assoc Miss	0.702541506	0.490900735
am127	VTC	Item Hit	0.508097061	0.381019638
am127	VTC	Item Miss	0.537006061	0.129508944
am129	VTC	Assoc Hit	0.629690324	0.74862112
am129	VTC	Assoc Miss	0.490336875	0.238121537
am129	VTC	Item Miss	0.572726038	0.028572144
am131	VTC	Assoc Hit	0.728940727	0.854019029
am131	VTC	Assoc Miss	0.501454096	0.659915149
am131	VTC	Item Hit	0.595609941	0.278016117
am131	VTC	Item Miss	0.430999551	-0.438197227
am132	VTC	Assoc Hit	0.700061772	1.054511837
am132	VTC	Item Hit	0.428440386	-0.377635303
am133	VTC	Assoc Hit	0.739218399	1.018261279
am133	VTC	Assoc Miss	0.529267419	0.175246498
am133	VTC	Item Miss	0.424267419	-0.178192975
am134	VTC	Assoc Hit	0.55082284	-0.017774114
am134	VTC	Assoc Miss	0.613734928	0.490528649
am134	VTC	Item Hit	0.601147516	0.604949246
am134	VTC	Item Miss	0.491299031	0.276049286
am135	VTC	Assoc Hit	0.638744493	0.603239823
am135	VTC	Item Hit	0.489757664	0.073636711
am136	VTC	Assoc Hit	0.87748804	1.490581648
am136	VTC	Assoc Miss	0.334715931	-0.761673089
am136	VTC	Item Miss	0.480549265	0.286406242
am138	VTC	Assoc Hit	0.833891932	1.656477024
am138	VTC	Assoc Miss	0.421854895	-0.666108165
am138	VTC	Item Hit	0.43700641	0.024945942
am139	VTC	Assoc Hit	0.698564804	0.707311782
am139	VTC	Assoc Miss	0.686146504	1.074030246
am139	VTC	Item Hit	0.561146504	0.154506422
am139	VTC	Item Miss	0.311146504	-0.582095383
am140	VTC	Assoc Hit	0.617802065	0.507095028
am140	VTC	Assoc Miss	0.724569742	0.854712548
am140	VTC	Item Miss	0.35038143	-0.346492775
am143	VTC	Assoc Hit	0.752508655	1.212049821
am143	VTC	Item Hit	0.429402594	-0.137345073
am143	VTC	Item Miss	0.510841988	-0.059389947
am145	VTC	Assoc Hit	0.491546997	0.444214552
am145	VTC	Item Hit	0.636955161	0.232661981
am146	VTC	Assoc Hit	0.549466327	0.482027651
am146	VTC	Item Hit	0.476504566	-0.160470158
am146	VTC	Item Miss	0.666782344	0.693757308
am147	VTC	Assoc Hit	0.670743297	0.864742077
am147	VTC	Assoc Miss	0.58599273	0.367205075
am147	VTC	Item Hit	0.303164447	-0.460706625
am147	VTC	Item Miss	0.697103841	0.58251254
am148	VTC	Assoc Hit	0.472395018	0.066611771
am148	VTC	Assoc Miss	0.656107139	0.610264763
am149	VTC	Assoc Hit	0.728182055	1.399726271
am149	VTC	Assoc Miss	0.674249876	0.245177636
am149	VTC	Item Miss	0.290321305	-0.629589105
am150	VTC	Assoc Hit	0.706151589	1.181950954
am150	VTC	Assoc Miss	0.422350569	-0.50507442
am152	VTC	Assoc Hit	0.80759347	1.534993068
am152	VTC	Assoc Miss	0.553970282	0.097027514
am152	VTC	Item Hit	0.453970282	-0.141044027
am152	VTC	Item Miss	0.441470282	-0.137223488
am153	VTC	Assoc Hit	0.74036219	1.438849152
am153	VTC	Assoc Miss	0.476195523	-0.077473095
am153	VTC	Item Miss	0.476195523	-0.346061257
am158	VTC	Assoc Hit	0.564251079	0.338438267
am161	VTC	Assoc Hit	0.641740256	0.803587329
am161	VTC	Assoc Miss	0.486761901	-0.126710795
am162	VTC	Assoc Hit	0.762867278	1.26657803
am162	VTC	Assoc Miss	0.404625519	-0.239783191
am162	VTC	Item Miss	0.52526044	-0.011480038
am163	VTC	Assoc Hit	0.769696655	1.041975361
am163	VTC	Assoc Miss	0.534440244	0.436306248
am163	VTC	Item Hit	0.423329133	-0.160046514
am163	VTC	Item Miss	0.529538284	0.035517973
am164	VTC	Assoc Hit	0.812472736	1.395683278
am164	VTC	Assoc Miss	0.328533107	-0.338092043
am164	VTC	Item Miss	0.551747393	-0.042276434
am166	VTC	Assoc Hit	0.562066428	0.725632638
am166	VTC	Assoc Miss	0.566435729	-0.048756104
am167	VTC	Assoc Hit	0.560668148	0.302272051
am167	VTC	Assoc Miss	0.554931433	0.615809988
am167	VTC	Item Miss	0.577153655	0.097232763
am168	VTC	Assoc Hit	0.782816039	1.888491936
am168	VTC	Assoc Miss	0.535167136	0.352421517
am168	VTC	Item Hit	0.858399459	0.262411007
am168	VTC	Item Miss	0.080621681	-1.149571392
am169	VTC	Assoc Hit	0.751104081	0.986910405
am169	VTC	Assoc Miss	0.319556462	-0.405916023
am169	VTC	Item Miss	0.622092694	0.434320419
am170	VTC	Assoc Hit	0.564251079	0.338438267
am171	VTC	Assoc Hit	0.850525191	1.629640806
am171	VTC	Assoc Miss	0.390810992	-0.413395776
am171	VTC	Item Miss	0.451417053	-0.200930229
am172	VTC	Assoc Hit	0.654893586	0.982883553
am172	VTC	Assoc Miss	0.477644909	0.048183198
am172	VTC	Item Hit	0.580819512	0.169411606
am172	VTC	Item Miss	0.543646309	0.153274711
am173	VTC	Assoc Hit	0.564251079	0.338438267
am175	VTC	Assoc Hit	0.836518562	2.041376176
am175	VTC	Item Hit	0.627522099	0.901398609
am175	VTC	Item Miss	0.228712575	-1.927459984
am176	VTC	Assoc Hit	0.68031686	1.220328252
am176	VTC	Item Miss	0.448185298	-0.543451718
am177	VTC	Assoc Hit	0.643544823	0.384881702
am177	VTC	Assoc Miss	0.595043041	0.539536266
am177	VTC	Item Hit	0.630487988	0.863003258
am177	VTC	Item Miss	0.387928464	-0.433668158
am180	VTC	Assoc Hit	0.881418258	1.798098001
am180	VTC	Assoc Miss	0.531280009	0.094389768
am180	VTC	Item Hit	0.574930802	0.514206143
am180	VTC	Item Miss	0.269375247	-1.052940845
am181	VTC	Assoc Hit	0.786646912	1.604556274
am181	VTC	Assoc Miss	0.341855246	-0.92767974
am182	VTC	Assoc Hit	0.68451623	0.903348302
am182	VTC	Assoc Miss	0.443985927	-0.226471768
am183	VTC	Assoc Hit	0.564251079	0.338438267
am184	VTC	Assoc Hit	0.488153973	0.274229526
am184	VTC	Item Hit	0.471347251	-0.03545364
am184	VTC	Item Miss	0.733252013	0.776538915
am185	VTC	Assoc Hit	0.736973577	0.91127877
am185	VTC	Assoc Miss	0.465010246	0.282831714
am185	VTC	Item Hit	0.661438818	0.546002716
am185	VTC	Item Miss	0.393581675	-0.386360133
am186	VTC	Assoc Hit	0.783208118	1.266256346
am186	VTC	Assoc Miss	0.756344764	0.322739536
am186	VTC	Item Hit	0.356344764	-0.198846875
am186	VTC	Item Miss	0.361106669	-0.03639594
am187	VTC	Assoc Hit	0.771142531	1.466110006
am187	VTC	Item Hit	0.357359627	-0.789233472
am188	VTC	Assoc Hit	0.652621042	0.979351185
am188	VTC	Item Hit	0.475881116	-0.302474652
am189	VTC	Assoc Hit	0.622905478	0.717579176
am189	VTC	Assoc Miss	0.50559668	-0.040702642
am190	VTC	Assoc Hit	0.779132031	1.28881518
am190	VTC	Assoc Miss	0.439846317	-0.099379812
am190	VTC	Item Hit	0.514846317	-0.141576717
am190	VTC	Item Miss	0.52317965	0.305894416
am191	VTC	Assoc Hit	0.591368406	0.774369414
am191	VTC	Assoc Miss	0.537133752	-0.09749288
am192	VTC	Assoc Hit	0.722239339	0.782253178
am192	VTC	Assoc Miss	0.557152374	0.345180013
am192	VTC	Item Miss	0.413361524	-0.11211839
am193	VTC	Assoc Hit	0.689047579	0.978116966
am193	VTC	Item Hit	0.391046968	-0.365142011
am193	VTC	Item Miss	0.61265869	0.402339847
am194	VTC	Assoc Hit	0.775587851	1.00513517
am194	VTC	Assoc Miss	0.519946329	0.299239862
am194	VTC	Item Hit	0.397219057	-0.289060231
am195	VTC	Assoc Hit	0.564251079	0.338438267
am196	VTC	Assoc Hit	0.572314337	0.373291454
am196	VTC	Assoc Miss	0.336734601	-0.372776743
am196	VTC	Item Miss	0.783704298	1.014800089
am20	VTC	Assoc Hit	0.63504473	0.858191323
am20	VTC	Assoc Miss	0.371711396	-0.125814206
am20	VTC	Item Miss	0.685997111	0.282937684
am200	VTC	Assoc Hit	0.63794544	1.115143954
am200	VTC	Assoc Miss	0.479104281	-0.50166428
am200	VTC	Item Hit	0.606088408	0.380569374
am200	VTC	Item Miss	0.533866186	0.359704019
am202	VTC	Assoc Hit	0.614581676	0.494589212
am202	VTC	Assoc Miss	0.513920482	0.182287322
am203	VTC	Assoc Hit	0.640931751	0.825745234
am203	VTC	Item Miss	0.487570407	-0.1488687
am29	VTC	Assoc Hit	0.675898441	0.62117595
am29	VTC	Assoc Miss	0.649257514	0.307761141
am29	VTC	Item Hit	0.715924181	0.839674149
am29	VTC	Item Miss	0.215924181	-0.414858171
am30	VTC	Assoc Hit	0.62233196	0.601727841
am30	VTC	Assoc Miss	0.254574717	-0.300204216
am30	VTC	Item Hit	0.788304876	0.85759819
am30	VTC	Item Miss	0.591792762	0.194631253
am35	VTC	Assoc Hit	0.591311673	0.297098774
am35	VTC	Assoc Miss	0.679461593	0.757348154
am35	VTC	Item Hit	0.581478081	0.306903599
am35	VTC	Item Miss	0.404752968	-0.007597458
am36	VTC	Assoc Hit	0.564251079	0.338438267
am41	VTC	Assoc Hit	0.661132171	1.068102543
am41	VTC	Assoc Miss	0.550021059	0.106988429
am41	VTC	Item Hit	0.481600007	-0.159776172
am44	VTC	Assoc Hit	0.569662199	0.397699465
am44	VTC	Item Hit	0.427021709	0.120978241
am44	VTC	Item Miss	0.696069328	0.496637094
am45	VTC	Assoc Hit	0.594987943	0.555179662
am45	VTC	Assoc Miss	0.561941966	0.08883794
am45	VTC	Item Hit	0.639322918	0.791380974
am45	VTC	Item Miss	0.460751489	-0.081645508
am46	VTC	Assoc Hit	0.77384964	1.214639551
am46	VTC	Assoc Miss	0.436905334	-0.098291886
am46	VTC	Item Hit	0.531061179	0.225210889
am46	VTC	Item Miss	0.515188163	0.012194514
am58	VTC	Assoc Hit	0.618984027	0.860434233
am58	VTC	Item Hit	0.551395094	0.014046058
am58	VTC	Item Miss	0.522374115	0.14083451
am60	VTC	Assoc Hit	0.813516155	1.371538174
am60	VTC	Assoc Miss	0.401306853	-0.264440291
am60	VTC	Item Miss	0.477930229	-0.091783082
am63	VTC	Assoc Hit	0.564251079	0.338438267
am65	VTC	Assoc Hit	0.687553227	0.993057277
am65	VTC	Assoc Miss	0.449715389	-0.1090782
am65	VTC	Item Hit	0.55548462	0.131335723
am70	VTC	Assoc Hit	0.564251079	0.338438267
am73	VTC	Assoc Hit	0.591797544	0.484145253
am73	VTC	Assoc Miss	0.546509593	0.052630851
am73	VTC	Item Hit	0.5544461	0.478538696
am77	VTC	Assoc Hit	0.551332208	0.145018134
am77	VTC	Assoc Miss	0.602258134	0.620534604
am77	VTC	Item Hit	0.539162895	0.249762063
am78	VTC	Assoc Hit	0.744806634	0.947724646
am78	VTC	Item Hit	0.383695523	-0.270848112
am80	VTC	Assoc Hit	0.590126626	0.643479941
am80	VTC	Item Miss	0.538375532	0.033396593
am84	VTC	Assoc Hit	0.697661551	0.936869668
am84	VTC	Item Hit	0.430840606	-0.259993135
am85	VTC	Assoc Hit	0.683776039	0.597944684
am85	VTC	Assoc Miss	0.496034493	0.12365646
am85	VTC	Item Miss	0.512942705	0.293713657
am90	VTC	Assoc Hit	0.591364317	0.693030794
am90	VTC	Assoc Miss	0.349936884	-0.715029739
am90	VTC	Item Miss	0.751452036	1.037313746
am93	VTC	Assoc Hit	0.62984669	0.482318169
am93	VTC	Assoc Miss	0.498655468	0.194558365
am94	VTC	Assoc Hit	0.606601273	0.53917075
am94	VTC	Assoc Miss	0.393725333	-0.179422873
am94	VTC	Item Miss	0.692426631	0.655566923
am95	VTC	Assoc Hit	0.564251079	0.338438267
am96	VTC	Assoc Hit	0.572931634	0.341832233
am96	VTC	Assoc Miss	0.555570523	0.335044301
am97	VTC	Assoc Hit	0.680932036	0.747765558
am97	VTC	Assoc Miss	0.83921024	1.895496963
am97	VTC	Item Hit	0.611937513	0.052770016
am97	VTC	Item Miss	0.124924526	-1.342279469
am98	VTC	Assoc Hit	0.703322716	0.955312936
am98	VTC	Assoc Miss	0.249375348	-0.21344039
am98	VTC	Item Hit	0.582708681	0.047618149
am98	VTC	Item Miss	0.72159757	0.564262372
