# Supplementary material for: Hippocampal and cortical mechanisms at retrieval explain variability in episodic remembering in older adults
Source: eLife. 2020 May 29;9:e55335. doi: 10.7554/eLife.55335 (PMC7259949; doi:10.7554/eLife.55335)
Supplement: Figure 4—source data 2. [file elife-55335-fig4-data2.csv]

Subject	Condition	Word	Assoc_Hit	Ex_Sp_Hit	RT	Logit_ANG_y	Logit_VTC_y	HC	CADG_ant	CA3DG	CA1	Sub	CADG_post
am100	MF	MAGNET	0	0	2008.1397	-1.175109789	-2.224146062	5.156677888	1.952775636	17.72652179	18.45043553	14.78697377	-20.62125374
am100	SMP	STAR	0	0	3783.1591	-2.798721359	-1.135365304	-2.220437989	-3.720367502	-10.28058822	-16.30839649	17.23203508	-4.131194203
am100	SHF	BOWL	1	1	2857.8634	-0.114629182	0.627111947	4.608560218	1.808117212	28.03785569	7.454786242	-7.701531726	9.420506093
am100	SHP	WHIP	1	1	2951.3789	0.740470367	1.636989666	-11.72793457	-17.63914984	-25.74919515	-0.321691202	7.996967475	-6.58499204
am100	SHP	MUFFIN	1	0	2556.0678	2.366064096	3.24373079	14.86943217	19.0875867	-1.677925555	30.30538286	10.11865173	6.080083744
am100	SHF	UMBRELLA	1	1	2839.1033	5.057740484	1.054065321	-4.939188057	-7.019610604	0.88172119	-23.49265887	-5.553255459	16.89645113
am100	SHP	HONEY	1	0	2955.8356	2.314022402	2.225735673	8.754181458	9.730248533	29.86455118	0.245636897	-3.595599502	6.58498769
am100	IP	SPONGE	0	1	3663.7121	1.696047486	-2.419764952	-12.14712544	-14.66792887	-11.24489577	8.332284765	-8.319232579	-24.60414625
am100	SMF	CAKE	0	0	3635.3807	1.367042251	1.044695184	-9.931628981	-18.07755899	5.578538145	-8.603676716	11.06847691	-20.99415844
am100	SHF	PURSE	1	1	2846.6773	2.685996762	3.601337931	-5.932688685	-16.4205754	21.95857787	1.987775431	6.182285165	-10.53608684
am100	SHF	FORK	1	0	3251.3575	0.242455754	1.972594178	-2.429176512	-3.339200584	-10.69310324	-20.0054022	10.12297505	7.300160096
am100	SHP	SWORD	1	1	2290.0044	4.375787711	2.45756974	3.186073287	3.378971166	-4.467214833	10.21439982	-0.648915754	11.24056562
am100	SHP	TROPHY	1	1	3947.4905	1.822591416	2.396683237	13.7437197	14.9392751	18.66940455	-2.567035142	20.45395034	5.174619992
am100	SHP	TAXI	1	1	2267.7462	-4.394542414	0.475105646	17.76689242	22.0889859	25.66967318	11.19342903	1.456629386	18.31740794
am100	SHF	WINE	1	1	2006.6388	1.13530447	3.952686303	-0.468178951	-1.749534934	1.038953895	-10.09076818	-13.75196282	35.11455249
am100	IF	BOOT	0	0	3655.2742	-2.005851121	0.214755718	-4.36670278	-9.315341418	12.43365847	-3.600249238	-3.134112537	-0.782928435
am100	SMP	TRAY	0	0	3502.6423	2.419220288	3.29762281	15.31475785	16.53150239	5.165449459	2.362325582	13.29621459	35.88797716
am100	MF	LAMP	0	0	3372.9515	3.117886995	1.089128339	-0.385586286	-1.712074592	-12.42348047	-3.076649994	6.501447645	11.97665619
am100	MP	ROCKET	0	0	3735.5336	-2.371598578	-0.072743158	-13.67967888	-20.7543733	-28.44006173	-5.469986272	16.74402296	-16.27003297
am100	SHP	WALLET	1	0	3286.2774	4.311912578	1.313059427	14.9824354	20.04423316	1.804878758	-5.001997192	13.87591442	23.5914734
am100	SHF	PENCIL	1	1	3011.0852	4.246755721	5.357328861	7.701217541	2.704761032	19.36831127	9.194884775	17.02690274	3.616916237
am100	SHP	OVEN	1	0	3237.198	1.916891759	0.370279282	-2.930383601	-3.446990435	-13.27673423	-13.57893685	6.311464856	6.410096336
am100	SHP	PLATE	1	1	4062.4649	5.039639474	2.067094155	33.20649023	41.03581908	61.80043379	9.955812858	26.66635478	-10.47636693
am100	SHF	PAIL	1	1	2354.3961	-0.063826696	-1.641100973	-0.430330757	-0.992870255	-26.7414422	-3.588329133	8.909483816	21.18009379
am100	SHF	DIAMOND	1	1	4641.9724	2.465757456	4.985092377	16.92431342	17.57690227	29.60144678	11.98998876	14.37592671	7.079864657
am100	SHP	JACKET	1	0	4312.5383	2.963816054	0.826283637	12.2405347	9.418201754	32.56426526	16.14932682	9.344589677	4.361157998
am100	SMP	ENVELOPE	0	0	3499.8182	-2.215231363	-1.033729526	2.54888762	-0.52088302	-14.60947	1.054325741	21.73434429	8.852683958
am100	MF	TOWEL	0	0	3036.3294	-1.02192217	-3.297340783	-19.90709501	-21.79985358	-23.45612602	-33.99543265	-6.409732748	-15.25848171
am100	SHF	BARREL	1	1	3267.0428	1.638818898	0.203150045	3.374655999	3.171404391	20.85200398	7.840792582	-7.406826693	-2.501328138
am100	SHF	NEEDLE	1	1	2752.7494	4.071515765	2.634674763	14.42396899	28.4282716	7.209297585	-3.508160238	-1.225875284	-9.283136508
am100	IP	SCISSORS	0	0	3603.645	-0.003640204	-0.066495471	10.35394667	8.11063548	-3.820362562	34.24896474	15.46796611	9.106528587
am100	MF	ROPE	0	0	3650.5746	-1.372409705	-0.639231521	-25.7089855	-27.45965814	-28.46920823	-14.46831101	-23.85853705	-26.32743198
am100	IP	SOCK	0	0	3315.0686	1.00486995	0.731019941	-4.613334684	-9.583942618	-3.832689899	0.889245367	3.468639313	2.517686552
am100	SHF	COFFEE	1	1	2267.996	0.796067578	2.984089415	-6.33779519	-5.985160501	-31.24714384	-18.03729504	24.09816468	-18.36117242
am100	SMP	MUG	0	1	3211.4796	-1.616893671	0.193883537	-5.211214286	-7.35557747	5.35122483	-26.00071662	5.472021179	-5.286910776
am100	SHP	PAINTBRUSH	1	1	2755.7343	-1.866292435	3.147969247	-13.64285401	-7.396412999	-36.45282601	-19.33577901	-21.59847485	-1.452474844
am100	SHF	WOLF	1	0	2069.9377	4.608301353	4.0189168	-10.86552486	-18.44783636	31.60894039	-5.676263875	-33.30447921	11.31208568
am100	MP	LIME	0	0	1851.5306	2.684258185	1.202564396	-2.263271769	-6.806280731	-14.00551913	9.573123865	7.410031018	9.1239205
am100	SHF	NET	1	0	2570.4022	-0.12967099	1.475902716	-7.638701894	-10.18106996	-30.32841691	14.54059489	-3.384508436	5.758581791
am100	IP	MILK	0	0	3470.6967	1.625349558	0.16947491	8.630112187	7.56287362	7.675034899	19.01455122	8.214995035	6.757873545
am100	SHP	CROWN	1	0	3711.1251	1.591133965	0.664391542	1.0622477	1.992618414	-30.37964129	-7.322988488	19.64276491	10.30123903
am100	IF	BANANA	0	0	3988.6609	-0.363221661	-0.878907117	-18.3537591	-25.00230517	7.9168461	-54.53819119	-11.23848526	6.559890245
am100	SHF	QUILT	1	0	2697.977	3.869076551	1.396625235	9.461140212	7.744360409	31.14779436	20.95990511	2.700266774	-6.347549696
am100	SHP	PENNY	1	1	1971.917	3.352896895	1.56254889	-6.519524715	-5.894168175	-30.59639214	-8.319938638	-2.404571817	13.54507154
am100	IP	FENCE	0	0	3582.4107	-0.747579851	-0.550897551	-4.892251287	-2.106356193	-12.46666836	3.029362869	-17.91835565	3.687218702
am100	SHF	PILLOW	1	0	3868.0783	-0.635774181	-1.840919067	-0.050748509	0.683669966	-13.20345529	0.663433111	13.28954561	-11.00206286
am100	IF	LOCKER	0	0	3145.9219	2.34807714	3.019724223	24.9303383	30.03792626	-5.146384062	40.98418396	33.53299687	4.879673755
am100	SHF	PYTHON	1	1	1989.9257	2.889627193	2.462590095	1.440990269	1.036855441	11.58835828	3.595878694	-6.877807013	3.337641577
am100	SHP	MUSTARD	1	1	3332.4731	4.796660436	2.318765709	-4.481228735	-7.786894226	-2.998506686	17.33867101	-11.27279784	2.848892897
am100	IP	CANNON	0	0	2566.8404	-0.308623486	2.201063848	-6.667535999	-5.698286278	-20.04179446	-2.075177564	1.048708082	-12.81143553
am100	MF	HOOK	0	0	3443.2994	1.104988359	-1.329513578	-6.038365555	-13.69540897	-0.94403092	-13.18540421	8.009008858	11.75770621
am100	SHF	CANDLE	1	1	2781.3251	-0.289175208	-4.404585756	-0.097107149	-1.229390066	2.682129539	5.795852159	-6.336685676	7.600252863
am100	MP	CRADLE	0	0	3386.0134	-2.780220776	-4.83007198	4.648197717	7.321921875	4.450119284	13.80454044	-5.203912642	-1.272402255
am100	SHP	TOILET	1	0	2341.4977	4.203870234	2.989598248	-2.276858958	-7.210556638	9.225107872	-6.947799311	-8.39456268	24.53174982
am100	SHF	BASKET	1	0	3379.7452	0.465551171	-1.044073461	10.97992052	18.34870753	-2.556892403	-11.7758045	15.3930615	1.174611704
am100	SHF	TIRE	1	0	2861.5443	2.864997506	1.239216848	8.674738174	14.80551818	-17.46776804	-6.129089378	15.94749837	8.502537702
am100	SHP	VIOLIN	1	1	2304.7065	1.146555108	4.926941689	5.076105029	5.094749939	20.70673256	-12.78060608	9.629241163	-4.997805981
am100	SHP	OTTER	1	1	2224.3819	2.667230592	0.894253193	2.949903417	5.61386461	9.758376894	13.38484072	-13.53850896	-1.427558316
am100	IF	ORANGE	0	0	3028.0294	2.957024427	5.898212891	-8.323163348	-4.801066093	-12.61382995	-11.20581661	-9.973022732	-16.58611819
am100	IP	GUITAR	0	0	2531.5438	1.443703995	1.502685448	17.0805916	20.21096817	-14.11666323	30.17447818	21.75970597	17.97558986
am100	IP	TIGER	0	1	3995.859	4.461818056	1.725837729	7.784317762	7.860941462	16.75676634	4.672876838	3.512156863	6.588813999
am100	IP	COUCH	0	1	3515.8701	0.17970396	-0.215077069	8.403765951	10.23295966	-14.32436213	11.80500478	17.8831159	6.95606306
am100	SHP	LION	1	0	3201.2966	-0.518847684	3.458098235	12.41169413	19.33481417	-1.373543788	13.27244478	5.799361333	2.200184973
am100	SHF	ROSE	1	1	1830.4263	6.561444971	7.051356752	11.0349094	8.013527871	-3.998616949	31.21645091	13.28991971	22.98954414
am100	SHF	CRAB	1	1	2222.5495	-1.573377296	3.252839373	-8.738503277	-11.16195366	-17.77348051	-19.83819712	13.97903442	-12.67552741
am100	SHF	MOTH	1	0	1738.4031	2.791093888	2.736935698	3.804805565	7.894874213	-2.505185962	-14.34167981	4.639647371	4.56363669
am100	IF	BRAIN	0	0	2606.9584	0.381921729	1.34962952	14.4129084	12.15773603	21.93329396	11.17475666	18.43320173	13.72914589
am100	SHF	FAN	1	0	3142.2421	0.787866479	1.604467787	18.83705106	18.20211735	15.63699519	16.45161539	14.63022845	35.08470107
am100	SMP	SOUP	0	0	2062.7558	-0.534555451	-0.028597091	-7.441647604	2.732692949	-31.71010042	-0.566581862	-21.57335995	-15.46043513
am100	SHF	CORN	1	1	2230.2267	4.91921992	4.317262124	-15.58252209	-20.54050936	-6.542940815	-14.65638811	-17.13967765	1.712235818
am100	SHP	BUTTER	1	0	3348.7083	0.424587089	2.725067531	10.05869088	16.17782412	2.837911003	7.485315015	2.605632436	0.802651212
am100	IP	ELEPHANT	0	0	3318.3984	-1.039790482	-0.877558721	-14.05823806	-21.12788152	-18.46771421	-5.518305727	0.293580725	-2.727188931
am100	IP	DESK	0	1	2511.4054	2.693873307	3.156473195	2.139389339	3.03741445	6.312695869	13.41028325	-5.446831878	-5.195032434
am100	IF	CARROT	0	1	2741.1818	-1.39326241	-2.958977872	-15.73640499	-20.82423043	-2.220732658	-30.4806049	-12.47176769	3.086472459
am100	IP	CEREAL	0	0	2780.776	0.915147042	0.722426044	18.84864933	22.4324214	24.39591477	19.33997138	9.438031956	8.362514258
am100	MP	BONE	0	0	2875.3858	1.50416695	-0.449834284	-17.2356714	-25.78943626	-30.58650154	1.256066779	-13.6646476	21.39479875
am100	SHF	GOAT	1	0	1785.3001	-1.45196432	1.621763053	16.48257281	8.621511809	34.76684922	16.87054463	25.0271172	22.01859552
am100	IF	DRUM	0	0	3333.8177	0.625873669	-0.277709959	-18.55410906	-25.04494253	-2.351730202	-16.60575645	-17.68736526	-6.547728343
am100	SHP	KITTEN	1	1	2130.2045	-1.310517858	0.272390712	13.4961622	10.33953439	22.16167857	17.98053524	11.95604453	18.45672152
am100	SHF	STOOL	1	1	2434.5692	6.84937385	6.848835171	0.775831557	-6.494431965	32.88384478	12.00096997	0.47043118	-8.361415692
am100	MP	CLOCK	0	0	2234.6364	3.021006776	0.890289082	-23.92922367	-24.80616577	-36.20859403	-19.2963268	-27.82967274	-2.455471834
am100	SHP	DOLLAR	1	1	2728.9275	7.982450795	5.56331123	12.21536525	14.70268372	6.850025085	6.170661659	-1.461499412	33.40139775
am100	SHF	NEST	1	0	2072.7041	4.203245067	1.251907626	-5.523687246	-10.36378764	-0.595554244	-0.376719851	0.706116499	-0.62595971
am100	SHF	DEER	1	0	1970.1897	-0.345538395	-3.253317477	-13.41111562	-19.85994604	-20.54172042	-26.04439418	23.28242824	-19.95185106
am100	IP	PAN	0	0	3978.4685	2.996894912	0.985476381	6.631826814	11.46876388	5.000755197	19.20644459	-19.50591848	14.74016903
am100	IP	BIBLE	0	1	3230.2596	0.400781892	2.120807666	20.35842273	26.30225979	23.39250247	5.471432478	13.7135449	9.620874288
am100	IF	NAPKIN	0	1	2251.1197	0.398220957	1.168845549	19.84949531	25.59863629	3.53391618	19.30252443	24.98407173	0.744886029
am104	MF	SHOWER	0	0	1895.0785	2.323321566	2.901643745	3.159222214	-5.239199501	22.47168232	15.83269082	-0.810204063	9.742220632
am104	MP	FORK	0	0	3019.3356	-1.917205513	-0.967452747	8.22704886	0.935194793	-10.30791178	8.663176231	28.74423174	19.01184336
am104	SHP	CROWN	1	0	1482.6035	-1.830055511	1.97089653	10.94040813	14.46747094	16.3390923	12.55966223	17.99886057	-9.749260685
am104	SHP	MOON	1	0	4264.8869	0.534251245	0.884789403	2.623692187	-9.053135853	11.31026728	23.86484401	12.37696836	6.74944355
am104	SMF	TIGER	0	0	3240.4663	-0.105397061	-0.53172786	-11.45987565	-22.02353843	-1.385766526	-14.84954011	12.50706381	-12.49795247
am104	SHF	NAPKIN	1	0	3701.7031	1.068310759	-0.971961877	-6.14197968	-15.5437539	-17.40821535	-14.6506021	7.68604889	16.66090816
am104	SMP	LAMP	0	0	3484.6969	5.077366692	-0.892817366	-10.85103283	-2.530370573	-17.27790025	-3.649009648	-39.81015197	-3.366259878
am104	MF	MOTH	0	0	1822.8875	2.196645407	0.850877466	-12.66992935	-4.017344076	0.481090492	-9.409602854	-59.1568745	0.4442638
am104	SHF	ORANGE	1	0	1724.0058	-1.110576937	0.506548329	2.297114939	8.559670479	3.838741489	3.767608187	6.153839823	-19.74989471
am104	SHF	CAMERA	1	0	3889.323	1.027177898	-0.576950114	13.98192553	19.20745334	-21.47116018	-9.610129452	20.05881914	30.0021438
am104	SMF	BANANA	0	0	3257.7531	-1.209643302	-0.024120304	10.48224264	18.46167766	0.944243042	15.0758467	-2.343753078	6.23968584
am104	SHF	CEREAL	1	0	2897.2449	1.713723996	1.828777852	-10.71006285	-7.375521783	-27.08077949	15.155671	-43.42834888	10.47650154
am104	SMP	ELEPHANT	0	0	2124.0866	3.902726298	1.604153646	-41.21924282	-56.7460826	-6.630567694	-20.21877418	-70.58254818	-5.146639219
am104	MP	TRUMPET	0	0	1765.724	2.861317453	-0.825539493	-0.010587927	11.47164505	-13.79743389	-5.888030504	2.170841688	-20.10082954
am104	SHF	MUG	1	0	2226.2023	1.308563892	1.442466773	8.659037449	4.249601807	23.81690286	16.9022773	-1.831038143	16.32050545
am104	SMP	DEER	0	0	1329.4958	0.274803625	0.468223867	-18.71579039	-17.49250732	-28.77740661	-11.92522653	-33.50155749	-4.084689143
am104	SMP	SCISSORS	0	0	3004.8419	-0.929362426	1.296294642	6.12040797	-9.778075455	14.97319185	16.09935258	22.49753122	20.47913687
am104	SMF	CLOCK	0	0	3763.9888	-0.032967736	-2.095712786	13.18955428	20.12461705	12.99821617	-24.74725283	21.96304193	6.130491451
am104	MP	PAIL	0	0	2288.4387	-0.745428086	-0.415179428	-11.84595315	-12.23722242	-21.95830194	-20.159367	2.386889169	-13.9452037
am104	SHF	BROOM	1	0	1870.3316	0.338067985	1.008156177	10.0343847	23.20638131	7.199190796	5.02698347	-6.98637903	-3.107201262
am104	MF	PIGEON	0	0	3789.1134	1.131580369	-0.058768306	-4.729480785	12.1225808	-6.094192445	-4.967388591	-29.38067188	-23.3913828
am104	SMP	MANURE	0	0	2901.2855	0.640387737	2.24890882	19.70026881	11.23960711	31.72453353	3.975520255	28.28566682	33.56153671
am104	SHP	CASTLE	1	0	3863.9713	0.372296881	-0.158644605	-42.9444639	-59.62859728	-68.28949902	-35.01939487	-19.58008145	-9.736135523
am104	MF	KNIFE	0	0	3004.8647	1.961734332	1.992199532	-5.639697266	-9.038913317	3.285046502	-3.134345386	-12.50251593	2.880950258
am104	SHF	TOILET	1	0	1599.9985	4.866740349	0.471108566	6.82964631	13.58049344	23.2040828	10.81025788	-2.765855146	-14.26002147
am104	SMP	ANCHOR	0	0	1793.4135	-0.784455296	0.686328167	7.918890565	-2.196783441	10.63531872	16.73777991	34.24435804	1.889395883
am104	SHF	KEG	1	0	1966.8622	4.592044996	0.095209579	4.093884287	24.19664353	-3.809700165	-16.97674265	-28.22985279	-0.29807796
am104	SHP	HAMMER	1	0	1734.5459	-1.895505453	-0.67199669	-13.17284161	-15.13163743	-0.194757456	-7.253247242	-29.45537748	-3.526512038
am104	SHP	UMBRELLA	1	0	2820.8608	-0.183223636	2.230052578	18.49554671	13.82110579	54.19953281	19.06542251	5.626920476	19.58805104
am104	SMF	FAN	0	0	2517.6702	-1.247598673	0.261972364	20.97892968	23.31137199	4.956216068	20.40860238	14.91714525	31.80575271
am104	SHF	ARROW	1	0	1799.7511	-3.622477059	0.165210071	15.27009774	14.95159674	39.18153125	0.8096928	8.098350062	14.9057927
am104	MP	LADDER	0	1	1718.2839	-2.025816086	-0.95920606	-3.93518283	0.438877274	30.47837119	-34.95984594	-35.79933839	9.595911776
am104	SHF	OYSTER	1	0	2383.1576	-1.199534196	1.402887876	24.54907817	25.16573085	59.34581723	-6.271545508	11.92453722	28.44554427
am104	SMP	PLATE	0	0	1701.909	2.516801549	0.237119043	1.875115524	-6.054194254	4.575827586	36.59636751	8.616665579	-3.875701913
am104	SHP	LIZARD	1	0	3131.3714	0.150012281	0.240164441	6.30839397	11.1819877	-41.65578437	15.97642978	32.83429018	-6.082646224
am104	SMF	GOAT	0	0	2821.527	-2.973070852	-1.063242249	-15.96054273	-31.0606972	-22.11603493	-10.05988099	5.751005066	3.069391311
am104	SHP	FLAG	1	0	1085.968	-3.110721901	-0.288655071	24.30095907	27.65526298	49.91255095	57.51915276	-19.2179783	24.52306952
am104	SMP	BACON	0	0	1749.4125	1.491985321	0.832820051	21.64308077	7.508916768	47.27387627	16.44006891	32.67918893	33.45793939
am104	SHP	SHOVEL	1	0	2136.4067	-4.687782482	-1.114052031	-4.502847522	11.60823848	-36.46871864	-19.65369528	-2.540819044	-19.64349459
am104	MF	PARADE	0	0	2371.9497	0.942236861	-0.038921842	13.01228753	24.73771931	19.69324588	26.28061187	5.555421104	-21.65563882
am104	SMP	KETTLE	0	0	2526.7349	0.382787324	-1.053442104	4.468726458	-1.129775508	-19.19130244	10.94389893	16.83754014	19.17079206
am104	SMP	DOLLAR	0	0	2842.8481	1.165453015	0.682776073	-14.63720139	-28.05506867	42.22709092	-18.57378295	-38.98005891	9.113823237
am104	SMP	QUILT	0	0	4666.34	0.119726331	-0.2605244	3.847283014	1.129228331	32.07557368	4.70970591	0.482667536	-4.838042747
am104	SHF	SOUP	1	0	2604.33	0.120085016	-1.762763121	-1.35450022	-9.064580419	-9.61549115	-2.824013263	-6.851478459	30.57350926
am104	SHF	JELLY	1	0	1683.2752	4.296374018	0.049733412	-1.558891273	11.59184778	-25.85032284	-17.43612778	7.376246799	-20.57756937
am104	SHP	BENCH	1	0	2384.6065	1.185891552	2.386979583	28.5753814	26.70026949	28.61384041	-16.40392853	45.45146757	40.07762901
am104	SMP	MONKEY	0	0	3131.5405	2.942828886	-0.938439081	-9.571006288	-12.56899832	4.608567618	-2.145178128	3.138456815	-27.60500157
am104	SHF	PENCIL	1	0	2147.1112	2.510380295	2.622317805	9.409753432	-9.366674894	26.0327208	14.8383423	19.24329171	35.03877708
am104	SHF	LION	1	0	1888.1302	0.521981202	-1.25347781	-1.414865498	20.86036117	-3.39369921	-10.64449169	-32.5454038	-22.7758637
am104	MP	WALLET	0	0	3027.445	-0.373400003	-1.293805671	13.93748609	9.246600936	4.621356284	20.66943176	44.65733743	-1.628650204
am104	SMF	MUFFIN	0	0	2930.6423	1.798909676	0.674492852	12.36825321	7.168866455	-3.558206877	0.548757169	28.79430782	26.37641621
am104	SMF	PILLOW	0	0	1936.4164	0.995132358	1.106889982	2.159752784	-16.88594737	32.64096112	23.86595227	10.80989903	12.02127625
am104	SMP	CANE	0	0	1791.6841	2.427856035	1.795774294	-6.500245515	1.814307143	0.66826818	-13.36796081	-48.09770316	11.87113999
am104	SHF	BASKET	1	0	2474.6296	2.1710986	-1.295329775	-18.36365264	-16.86704024	-19.36910293	-36.47937688	-22.55956492	-8.030470993
am104	SHF	COUCH	1	0	1711.5813	-1.408086737	-0.110602887	13.71726741	10.7782477	33.15069368	19.66133767	0.27549026	18.81836129
am104	SHP	PAN	1	0	1546.3996	-1.893478324	0.109777516	-9.442600538	-9.380690533	14.00085756	-2.71568067	-12.38012503	-25.72190498
am104	SHF	BADGE	1	0	3093.9826	1.57571883	1.683503743	12.29084927	11.00938386	-10.63827999	22.49233494	13.04703186	24.79405295
am104	SHF	MAP	1	0	1728.1602	0.809226785	2.060125408	6.715795266	-2.296738021	29.86274452	-1.177024063	8.795375714	17.04783084
am104	IP	COFFEE	0	0	2291.7201	0.404864835	-0.048047778	0.653483134	0.830221145	-5.672439361	7.471139523	-1.843746479	3.320885896
am104	SHP	VIOLIN	1	0	3285.3616	-0.440251417	2.246134453	8.676993677	8.76802182	-5.494524329	2.681835418	12.67249233	16.97674685
am104	IP	BOOT	0	0	1633.7797	-4.146251342	-1.071280401	-16.9130858	-9.40919761	-44.25245848	-35.60707764	-18.33894033	-7.334031518
am104	SHF	MITTEN	1	0	2214.4696	4.26149217	-0.32093542	-13.00661706	-30.41451984	-11.10361308	-20.75556	-4.013332927	26.47796172
am104	SHP	CHEESE	1	1	1548.404	1.106576442	0.102218389	-5.347996714	-17.54541449	8.538329843	-7.239270082	8.145374268	5.006633015
am104	SHF	PENNY	1	0	1856.9989	-1.34977986	1.782307056	30.3462458	36.29079948	53.1623789	23.79547971	-1.497637009	34.69901006
am104	MP	PURSE	0	0	2709.3476	-4.866839407	-1.775173568	-42.21623689	-47.04405729	-48.32574851	-12.77115969	-34.34649311	-48.6400342
am104	SHP	SPOON	1	0	2925.4683	1.203312134	-0.176137474	-23.75010058	-32.77617534	-2.47775901	-39.39686595	-6.229677378	-23.46050801
am104	SMF	TROPHY	0	0	4341.447	-2.369390676	0.664041731	35.9519115	29.71251044	44.70200639	15.16721427	41.77598585	51.53415487
am104	MP	FLASK	0	0	2459.5421	-1.537770953	2.235011567	5.544098138	10.76530169	-26.98440887	35.4697528	-2.799896855	6.146354935
am104	SHF	PIANO	1	0	1501.2764	-2.077709154	1.153097886	-9.45310889	4.584443007	-41.47718052	-8.240384664	-18.36906165	-16.80982967
am104	SHP	TRACTOR	1	0	2118.0788	-0.622114712	3.034574605	-10.89871815	-18.05314221	-11.93899738	-2.529462375	-0.582401899	-6.05350826
am104	IP	RABBIT	0	0	3455.9892	2.033979432	0.066628752	-8.497896936	-5.271895323	6.364749443	-5.363539852	-14.00902847	-22.96127595
am104	SHF	DOLL	1	0	1473.3817	0.510857914	0.931807056	-5.375489874	-11.45949143	-11.6261055	14.42103381	19.43794293	-20.2405918
am104	SHF	OVEN	1	0	3273.8545	-3.055886944	-2.369274957	-0.19269313	-10.50163834	-4.436369828	8.191150533	18.75961457	6.455541343
am104	SMP	WOLF	0	0	1595.671	0.205083412	1.187246691	-32.424627	-34.07229973	-81.37249362	9.914093247	-5.616952615	-44.32819601
am104	SMF	OMELET	0	0	3870.0491	-3.791606678	0.678227876	-10.59151018	-9.561155504	-36.29487934	4.216644896	-3.266139757	-11.24007325
am104	SHF	TOWEL	1	1	1965.3271	0.264314574	-0.538320906	13.41967081	7.383888514	72.90549896	-20.20483939	-15.40331791	35.96309064
am105	SMF	RABBIT	0	0	4288.3107	-0.203885288	0.103741128	19.78179304	22.00603761	13.82039298	-17.45856025	24.42934479	29.34608561
am105	SHF	DIAMOND	1	1	3711.3275	1.102224771	0.408357496	-10.18284757	-8.711959775	0.89004152	-39.04685497	-21.88920613	-2.958658213
am105	SHP	STOOL	1	0	3542.686	-2.028975897	1.749271523	10.99665467	12.07592077	5.435626557	50.07734878	-9.346092645	14.50338518
am105	SHP	KETTLE	1	0	3484.3222	4.423686798	3.056445859	12.04615661	8.557305043	9.904249235	-4.598817908	11.6661739	34.22716819
am105	SHP	TOWEL	1	0	2406.0317	3.348819675	0.36879861	4.157683756	6.640863654	8.177112446	-6.541061315	1.809593269	-1.9029917
am105	SHF	MOUSE	1	0	4339.1511	-3.172782933	0.188911574	-0.324627968	-4.887999702	-1.483525453	16.39126212	0.386974455	9.358515645
am105	SHP	DOLLAR	1	0	3140.9622	4.950804729	1.349652191	12.82950054	14.68357046	14.87141487	0.590418028	13.18266585	9.121656858
am105	SHP	TAXI	1	0	3372.5309	1.813191395	5.789242542	36.06214706	48.03392993	27.09439089	26.16295065	6.836631324	33.0398328
am105	MF	LAMP	0	0	2052.1881	5.037674935	0.969211543	5.780293742	-2.820876472	-6.36775013	38.80710003	21.47576951	19.7802237
am105	MP	TOAST	0	0	4333.4295	-3.412609744	-1.325833956	10.20116148	-1.543161437	34.38129944	2.009114955	29.04979727	15.01263134
am105	SMP	MAP	0	0	3226.7852	-0.291310976	1.467698151	8.800254837	5.539143304	5.124913829	39.6639966	8.819989362	10.78045628
am105	SMP	DEER	0	0	4058.5012	0.046987018	1.077826048	27.07450934	29.60667434	46.02650881	-3.54836964	17.78483952	21.32681039
am105	SHF	ORANGE	1	0	3171.0814	5.630046638	3.848666646	27.67333412	21.75295326	31.71413816	30.34932126	31.38628656	40.45797192
am105	SMP	HOOK	0	0	3862.0122	4.778602454	-1.021200976	0.165572051	-0.836262754	-9.279223961	14.83551537	25.36124458	-16.70196188
am105	SHF	SOUP	1	0	4440.4684	3.00845782	3.817394536	12.00942154	17.87395604	14.78874987	-31.62070322	5.65269566	12.9090881
am105	SHF	FENCE	1	0	2378.4318	2.921337169	0.71190744	-9.399112408	-17.33627417	-19.59965561	7.427562853	11.57557418	2.415555638
am105	SHP	STRING	1	0	3556.8997	0.812471138	1.538380793	3.169921694	12.96298291	1.766204503	-3.701512304	-26.43113757	-0.332826568
am105	SHF	BIBLE	1	1	2208.5517	2.885456046	1.506049731	20.76685721	33.16550519	1.076159972	2.858642168	5.174160144	17.47681557
am105	SMF	PENNY	0	0	3364.9671	-0.667345183	0.484907654	-1.065068307	0.361101369	39.74585627	-45.90857559	-22.92906973	-6.329748608
am105	SMP	MUSTARD	0	0	2840.5139	-2.029854615	0.553382142	20.39852334	14.88240735	15.06064446	24.19370251	33.94455731	31.26812472
am105	SHF	NET	1	0	2210.4364	-2.364770419	0.271093232	11.54394673	10.90419594	15.07625045	-4.667485678	14.8246715	14.36522699
am105	SHP	PYTHON	1	0	3101.4323	-1.11182918	-0.168994942	9.766047967	17.79798536	24.19925618	-36.35116344	-7.412415722	2.6135861
am105	SMF	TRAY	0	0	3454.6235	-2.102781666	2.021533742	-5.764307073	-4.450760314	-18.48649927	-5.376659823	6.056179996	-9.222481948
am105	SHP	ELEPHANT	1	1	3538.6286	-2.030941494	1.272339794	25.91285465	37.89970142	22.07175688	-1.696037451	1.596867928	20.93992152
am105	SHF	CEREAL	1	0	2273.7898	2.613014271	3.053237544	24.44326489	24.75137586	3.041292359	-13.40636981	24.57972957	60.38152426
am105	SHF	STAR	1	0	2576.6603	-1.278491547	0.163927446	8.18050154	7.861074272	19.80080402	-6.363377757	1.052609528	10.89544569
am105	SHP	JACKET	1	1	3240.8113	-1.630176949	0.700394603	11.42531901	16.18317495	25.14438773	-13.23674895	8.166991957	-5.399133809
am105	SHP	OYSTER	1	1	2798.2456	-0.526561458	4.092596853	25.45129956	16.3166121	44.43249326	25.40010515	32.18869913	33.63562065
am105	MF	OTTER	0	0	3175.0322	0.756543943	-2.095215731	25.14365564	26.15941076	38.11195316	9.302146927	6.395344965	33.06362852
am105	SHF	BUTTER	1	0	4260.1344	-1.306150913	3.570257918	-6.429144313	-13.6316732	16.93667153	-14.69617507	8.564660108	-13.57208762
am105	IP	PLATE	0	0	3297.435	-0.440396768	0.020384688	-13.62456196	-13.04309336	-17.54273008	15.81064974	-37.73363136	-2.273796504
am105	SHF	DUCK	1	0	4336.2364	-2.470037573	2.036082632	19.17258526	23.77812297	-0.214326127	37.09089989	-6.571843501	37.58368248
am105	SHF	CROWN	1	0	4474.7032	1.718341122	1.478296814	2.560645195	2.523961055	15.5781333	10.91264674	-13.8476373	1.612488588
am105	SHF	ANCHOR	1	0	2949.9675	-0.033933743	2.691187239	4.535574632	-1.178015427	7.720717798	22.105052	-6.267467141	24.42758685
am105	SHF	ROPE	1	0	2145.2775	1.92171747	0.191411407	22.98734452	33.18573744	9.19748157	15.54741044	15.17985177	10.14322458
am105	SHF	MOTH	1	0	4841.7524	-3.533252952	-1.381035179	-12.98964719	-22.36811516	-13.3242176	-34.5919189	5.63586761	13.1685807
am105	SHF	FLASK	1	0	4363.2802	3.734967353	0.686453763	39.00598756	40.07692357	31.31717613	51.86673091	19.08649531	55.53840631
am105	SHP	POTATO	1	0	3468.5883	1.413951735	1.976883792	1.474387236	0.440729463	-2.206275319	-4.464931559	3.330887164	9.622937987
am105	IP	BADGE	0	0	4287.0764	0.644033531	1.11137756	-27.64255221	-34.36209526	-36.33130834	-2.057896691	10.17122304	-41.06138833
am105	SHP	PIGEON	1	0	4120.9447	-1.994421773	-0.398290463	15.19482119	27.42999382	18.529134	-13.44898042	-4.156583488	-1.810794593
am105	SHF	MAGNET	1	0	4548.5146	-4.501080934	-3.104131167	11.45029152	-4.909932264	4.066932154	45.10715283	30.75606265	45.1273242
am105	SMP	MITTEN	0	0	4403.6013	1.059940803	-1.481607496	1.72151554	-4.909492161	0.269510525	29.32506339	14.02993398	3.692345151
am105	SHF	BRAIN	1	0	3028.0707	1.978779534	0.084610705	-1.094365954	2.965629748	-2.294124046	-30.27644317	-6.121549242	2.708964457
am105	MP	SOAP	0	0	3723.2237	2.511573727	0.148513307	5.620702205	6.704371191	1.906220687	10.6035986	20.48424556	-10.58262222
am105	SHF	TIGER	1	0	4030.4942	-1.207159475	-2.11526646	15.13784111	22.30433917	0.352117959	17.30202824	-18.60481846	34.05741401
am105	SMP	SOCK	0	0	4228.1768	5.137422597	0.023516927	-12.25673263	-14.83513312	-0.629659793	-39.58249309	-13.58310578	-1.273724812
am105	SMF	BROOM	0	0	3910.5335	1.778812934	-4.248538823	10.00169254	15.26648858	11.55094743	5.567199577	20.56242306	-18.32879582
am105	SHP	VIOLIN	1	0	3582.6217	4.444494013	2.408022351	14.55620068	24.72844894	41.81796552	-37.09382857	-1.125795929	-11.79069671
am105	SHF	KNIFE	1	0	3734.0712	0.529154952	-0.751974747	-6.010621785	-8.688597599	9.987855706	-20.1273562	-6.491737724	-5.409223111
am105	SHP	CIGAR	1	0	3323.2628	-2.475640643	-0.351520104	-5.623997961	-2.238946488	-13.22217765	-6.173828388	-6.081056002	-9.751280363
am105	IF	APPLE	0	0	4211.0887	1.789604465	1.084124188	11.59956534	1.254448886	14.98196226	32.76497112	11.82524505	36.20500387
am105	SMP	LIZARD	0	0	3486.1079	3.171457034	-0.583622486	-10.93355314	-11.12004962	-16.68049833	-12.18796498	4.276454645	-18.21434861
am105	SHF	HAM	1	0	2655.995	8.731761091	5.316273219	18.39935525	32.55677812	6.841548771	8.590641902	0.427654522	-0.43300909
am105	SMF	CRAB	0	0	3429.2736	0.418414936	1.462751065	-3.301691856	0.301912806	23.30212506	-43.75085065	5.084550093	-32.48968807
am105	SHF	WHIP	1	0	2754.3289	4.976250934	2.944887637	10.25626368	2.121925354	14.74581753	22.00942028	22.47950132	18.77348098
am105	SHP	SPOON	1	0	4154.9046	2.86821276	1.169024858	1.943119296	5.317148157	-16.31351542	26.72470678	-2.193289985	0.709222146
am105	SHF	MUFFIN	1	0	3626.8765	-1.329201853	0.101439075	11.46856655	12.05873049	14.7938146	10.27016424	3.028977604	14.44116452
am105	SHP	TOILET	1	0	3655.8685	-2.23076941	2.977927545	16.31071568	24.55172672	7.437916062	27.84446366	-6.966105238	11.86634474
am105	SHF	KITTEN	1	0	4518.9521	-6.064859034	0.648422885	-9.357383234	-17.50743189	-9.436121212	-4.459600078	1.534671088	7.856195841
am105	IF	PHONE	0	0	4212.2955	0.825892439	0.670466914	-7.848330535	-11.80903666	-17.9791866	-1.012723559	22.29517465	-14.59804277
am105	SHP	PAN	1	0	3399.166	2.35895739	0.146257885	-14.12681343	-11.09117938	-32.17812359	0.144068364	-12.42147145	-15.21751763
am105	SHF	COFFEE	1	0	4346.1597	-0.620692829	0.853877994	7.838937715	10.83632652	1.25766525	45.83700412	-20.93222451	13.70843546
am105	SHF	PAIL	1	0	4417.3039	1.033913486	-1.094258721	-10.14920082	-19.05672527	-8.900751353	9.7218183	1.635205073	1.210296894
am105	SHP	SWORD	1	0	3124.5971	1.034328455	-1.034175746	11.27396518	20.49171569	6.496422675	8.259116694	-11.14768853	4.812558039
am105	SHP	CAGE	1	0	4828.3918	4.612803332	1.856475345	-14.05506009	-11.62324282	-30.89640117	0.896353922	-9.94034311	-16.67569722
am105	SHF	CHICKEN	1	0	2791.7924	6.197641331	-0.06136394	16.62398207	26.16053817	53.29873241	8.727376788	-18.21839543	-17.73419224
am105	SHP	CASTLE	1	0	4325.2233	-3.55275154	-0.130370027	-2.73861771	5.662675821	-6.504510609	-36.95643159	-21.32710793	2.670016121
am105	IF	BELL	0	0	4502.5412	-2.32440975	0.92260493	-1.018076559	4.739208936	4.177474657	-33.44803657	-1.00138593	-12.82250331
am105	SMF	NEST	0	0	3865.1704	1.459864714	2.54060682	-25.87397374	-31.27105058	-14.4825485	-18.65858427	-24.10912551	-22.28496493
am105	SHF	BASKET	1	0	4021.2808	2.154385968	1.815721446	-4.431477671	-1.089315436	1.326072158	-29.39370453	-6.601641766	-9.285868219
am105	SMP	KEG	0	0	4325.2683	-1.550526527	1.5295257	-4.083087641	-2.03302633	-22.32260865	23.91321154	-1.802541488	-7.898893988
am105	IF	COUCH	0	0	4408.2949	-0.133285637	-1.207612111	-4.752510744	-15.48197267	1.028314917	27.48228943	10.89840735	-0.164700162
am105	SHP	BALLOON	1	0	4080.6049	0.202080617	0.315202964	21.18822244	24.95143251	8.076039186	6.171330642	25.0421921	23.31877341
am105	SHF	CAPE	1	0	4510.409	-3.952541915	-0.215814613	-0.13965176	-11.23998302	0.054088038	27.76208594	14.9928749	13.57359844
am105	SMP	TIRE	0	0	4584.5246	-3.04216106	-1.060888401	0.10915195	5.597135246	0.650509703	-45.83718085	-5.726172876	5.060124053
am105	SHF	CANOE	1	0	2428.9919	2.665582503	0.706919604	-7.00243449	-9.53164165	6.122534895	-16.99857893	-28.62949735	13.67075113
am105	MP	MUG	0	0	2788.9179	-0.904353613	0.451758684	9.244381645	9.70589234	-17.84632105	38.70961214	41.248323	-8.401596761
am105	SHP	RAILROAD	1	0	4529.7654	6.70639509	2.274417986	2.349980462	16.42272631	-24.97391889	-12.27852034	-1.038333949	-12.25505309
am105	SHF	SEAL	1	0	3822.2449	0.012113135	4.247702598	5.259136123	9.835124747	-2.340004421	5.719390181	-11.52736154	11.53570211
am105	SMF	OVEN	0	0	3147.4799	0.285836687	0.103391113	-8.820000137	-8.92795292	1.168799008	-17.28789584	-21.78210689	-2.495736463
am105	SHP	BARREL	1	0	3100.7966	-0.499796939	1.036696809	17.93716087	14.97605304	11.21654107	45.42781109	35.63874215	6.879270325
am105	SHP	CHERRY	1	0	3880.1096	-0.139988569	0.350183317	-23.1003846	-22.54264649	-21.52381795	-23.3236968	-8.862833194	-39.7354117
am105	SHF	CARROT	1	0	2066.8775	-0.289265994	1.610410634	5.581762659	8.149622583	1.725350132	-1.600809617	10.12647549	-1.017597346
am105	IP	SHOVEL	0	0	4828.4091	-3.048399507	-3.939972443	12.94783578	16.82742836	32.04992013	16.82117638	1.576546261	-10.75634266
am105	SMP	PIE	0	0	4961.407	2.639655075	0.405045774	-3.963039016	-11.34684042	23.32887594	-5.329229657	-9.16044915	1.44900157
am105	SHP	GLASSES	1	0	3490.8788	0.053402123	0.410317844	25.37235159	22.89299473	13.25969894	36.65067389	33.34754644	33.8368995
am105	IF	DOLL	0	0	4397.3816	3.714193187	-0.10844232	-19.18582854	-43.08551558	16.00803623	57.98476143	-3.642422291	-15.11797021
am105	MP	QUILT	0	0	4470.0967	3.97387207	-4.251109794	-35.49391632	-41.96482627	-61.99172127	-35.42429641	2.232578848	-21.37484087
am105	IF	GUITAR	0	0	4233.2195	1.843305145	0.842689274	21.88874143	29.71694763	16.53694791	16.24217825	-10.90011871	31.72793263
am105	SHP	CRADLE	1	0	3054.1018	4.744295637	4.765352049	8.104917336	14.82766484	7.592721123	-16.00600626	6.70417633	-3.894960781
am105	SHP	LION	1	0	4216.3758	-1.826219457	-1.366330519	16.98421567	22.43487723	22.62749107	8.247579324	-6.980249589	17.83627674
am105	IP	PENCIL	0	0	2955.8671	1.558184453	3.908184185	13.85441474	5.396563796	31.17303179	36.9660294	-4.157038638	34.1496215
am105	SHF	CANDLE	1	0	4895.7007	-1.407847769	-3.116559308	14.81829851	11.62886776	8.842777997	26.33392888	23.93812085	18.70078014
am105	MF	HIGHWAY	0	0	2705.4175	3.094101568	-2.474125044	-2.694382275	6.194313289	-23.90275169	-12.43267817	-0.616065152	-11.76576635
am105	SHP	NEEDLE	1	0	3092.4981	4.711304058	1.541729366	16.14714478	22.08939848	20.67717537	-37.10978989	5.807205237	22.90683327
am105	SHF	FAN	1	0	2892.4195	5.452576286	1.681827261	8.793887856	18.54191325	21.64754861	-12.16652736	-16.89968501	-5.967973906
am106	SMP	KNIFE	0	0	3210.3786	2.307232544	0.1653156	-6.593276922	-34.3495731	11.02293956	16.89755995	7.048445243	31.33673555
am106	SHF	NET	1	1	2374.7235	1.179426697	2.712791551	11.61179839	45.32637312	-4.071166758	-27.02576716	-15.63201521	-25.29531721
am106	SMF	PIGEON	0	0	2930.2528	-1.223167929	0.666626261	-14.16396223	-11.59704305	-27.83609025	-6.091621565	-6.572534491	-17.65154375
am106	SHP	MAGNET	1	0	2885.3441	1.106321388	1.635890235	7.623873817	-15.14740197	31.22023692	1.780254828	14.11838909	46.99750444
am106	SHF	JACKET	1	0	3706.5817	2.464852817	0.790394577	-2.454881807	-3.922578995	14.30883589	3.548810983	-43.14911208	16.86958953
am106	SMF	WHIP	0	0	3350.6398	0.29463157	1.553322412	7.029261292	7.873882149	-10.39985352	18.47233847	23.35219915	3.133703359
am106	SHP	SOUP	1	0	3312.3397	-1.39954424	4.283127952	-6.990958317	-18.16530534	16.59059059	3.368252242	-14.19504017	0.027487612
am106	MP	MUG	0	0	3371.342	-1.207014032	-1.466603863	-4.368430154	-12.33570246	3.699962578	3.369489719	20.8121038	-17.68975375
am106	MP	DRUM	0	0	3165.4253	-4.475971677	-1.59740101	11.02959589	4.079619145	33.73862378	9.183822502	23.55380926	-5.355249589
am106	SHF	CANNON	1	0	3078.7357	0.608769179	-0.79265008	-18.32263321	-30.30866982	5.8585032	-2.446855791	-26.13796702	-12.17967673
am106	MP	PHONE	0	0	2438.8868	-4.1118783	-0.05604455	-0.321296768	-19.19038573	24.31725611	14.22982437	7.867533545	12.20496771
am106	MF	CRADLE	0	0	1535.4492	-2.288598782	-2.631212207	32.53418197	41.15986993	10.63501919	32.78060125	40.91044023	24.03681686
am106	MF	MILK	0	0	3019.2041	0.457087468	0.509076623	3.172438969	16.04753096	-31.82423733	18.97800258	27.2618739	-26.73254585
am106	SHP	BRAIN	1	0	3975.3478	1.483826565	-1.257566325	17.08066628	34.05812942	-11.15810996	24.32688769	22.39901965	-10.83507255
am106	MP	HOOK	0	0	3037.123	-5.010763599	-1.045586758	-0.324769286	-6.125805029	0.334312985	-5.676224839	1.810477704	17.90878723
am106	IF	TOAST	0	0	2887.516	1.671683885	1.787317441	12.2075948	27.24490173	-5.87684126	-0.023025783	26.56919928	-18.92801693
am106	SMF	FENCE	0	0	3299.9859	-4.69661467	1.890280011	0.014534499	4.089185437	-7.031693582	5.43475827	-6.934160881	-0.778122215
am106	MP	SOAP	0	0	3435.1944	-3.77653755	-0.246267027	-2.09558572	-0.228958724	11.4754004	-12.38192887	-11.4852314	-9.166131782
am106	SHF	DIAMOND	1	0	2271.2258	1.121010713	-1.289832041	7.448829176	-4.387609572	18.45251796	31.81247669	7.88476515	16.10300156
am106	SHP	DEER	1	1	2316.879	7.836965011	2.505537921	25.55933534	46.18001262	-0.900397714	18.53478217	-6.261963165	27.6465018
am106	SMP	CAMERA	0	1	2474.6127	-0.698832038	0.202975096	3.465721685	-13.99642944	15.72142381	30.08713477	4.987955081	25.62577769
am106	SHF	WALLET	1	0	3050.425	-1.005974651	2.123931157	18.3488834	47.78601711	-9.853717536	0.500039797	7.242963742	-17.83021149
am106	SMF	TRUMPET	0	0	2791.6303	-1.916661694	-1.460942157	-7.846892547	-3.664642163	-31.34976891	-8.21169913	3.151172789	-2.837884133
am106	SMP	SHOWER	0	0	2671.7773	4.504555895	2.349714114	22.61304093	38.30280752	7.067644045	5.40707206	29.94072587	-4.018628974
am106	SHP	CASTLE	1	0	1963.8194	5.42922614	2.326798232	4.803013342	7.524851923	17.84527744	5.728158961	18.42670523	-32.53314773
am106	SHF	KEG	1	1	1609.0353	2.36925342	-0.814029218	26.58935058	50.27285193	8.550794319	11.02627979	11.31499308	-1.393133953
am106	SHF	BONE	1	1	2007.685	1.787772564	2.503776819	0.118427581	1.324453773	10.17560708	-11.57751526	7.54294834	-15.73130119
am106	SHF	BOWL	1	0	2525.6759	-4.021059658	-1.689409518	-19.13077537	-21.78416745	-11.83582218	10.29778497	-8.930546714	-46.54030632
am106	SMP	STAR	0	0	2498.9626	2.028485743	3.552917024	1.11336697	-26.28439876	30.48211403	1.21451714	23.42750232	29.47365978
am106	SHF	DESK	1	1	2151.7603	1.962792221	2.270025646	-2.855693191	-10.35876041	4.284205532	4.770349675	14.2573369	-8.835612063
am106	MP	CLOCK	0	0	3652.2473	4.600858964	3.666678165	16.58278731	35.73256641	1.56165692	-5.462811715	-0.083796227	4.097531961
am106	SMF	DOLLAR	0	1	3159.495	-1.060586504	-1.779871489	14.41399496	23.34577972	17.6451248	25.23015195	14.60371893	-23.51582516
am106	SHP	DUCK	1	0	2138.4696	-1.063248628	1.949379417	-10.17651387	2.505224271	-35.85817537	-13.54566919	8.596347848	-34.33785664
am106	SMP	ROPE	0	0	2616.2925	-1.943197529	-0.99300171	10.57178496	6.640765245	10.98312021	0.706570875	23.21826654	16.08325965
am106	SHP	OVEN	1	1	2478.193	3.637463755	1.471400814	8.846472622	-7.889062677	39.33133581	11.97336165	15.80381261	15.6823929
am106	SMF	STRING	0	1	2621.6335	-0.428055139	0.368376172	-0.625080748	-0.522077599	-12.91463715	-12.933933	2.296843739	18.19967415
am106	SHF	SPONGE	1	0	2202.2468	4.62494477	3.654213231	-12.48863554	-14.06044625	-6.593385199	2.177964893	-23.73976535	-12.69051604
am106	SHF	COUCH	1	1	2184.7206	-0.658688241	-1.188495771	9.53465269	12.28779566	-17.91524736	15.39879171	-6.077031058	45.06948074
am106	MP	HAMMER	0	0	2366.4001	1.869239197	-0.540414734	-16.63156827	-33.21711711	-5.406039558	-10.85300807	28.42303634	-24.71319224
am106	SHF	PAN	1	0	2150.6985	7.211423235	4.312176461	-21.57987686	-12.09031873	-46.36688204	-31.67352276	15.3223086	-50.0934906
am106	SHP	MAP	1	1	2089.8434	0.916598089	-1.630773813	-8.903551006	-9.459775149	-21.28832757	-26.7224869	4.762464006	5.1825379
am106	MP	ARROW	0	0	3595.3635	-0.080530371	1.587903417	44.60330331	50.34031171	40.12643392	20.5258574	47.17999846	43.96318015
am106	SHF	FAN	1	0	2640.0355	5.266250972	1.956635085	-13.27741015	-22.88373829	13.64344913	-22.9911095	-26.13289269	2.027834859
am106	SHP	CANE	1	0	3053.1403	1.078591119	-0.249371369	2.042000244	-2.258147441	14.68722721	0.240756133	-9.212184697	11.86863134
am106	SHF	OYSTER	1	0	1773.4348	2.788477539	0.184887682	16.42142339	23.18048998	16.82914503	-3.694875728	4.070382643	18.53479651
am106	MP	ORANGE	0	0	2427.9869	2.276329557	-1.020779769	-15.34801982	-26.10126178	-9.542692151	-1.373969905	-9.397094043	-2.924856356
am106	SHF	MOTH	1	0	2855.6485	1.131547075	-1.847176621	17.83244259	2.906928206	18.09242344	31.31064172	33.09030243	41.26557654
am106	SMP	CROWN	0	0	2944.6483	2.034234022	-2.580135727	4.258221235	2.467676058	6.267824601	17.90307716	7.498214245	-3.681242617
am106	SHF	HONEY	1	0	2491.6171	0.059504794	0.81362248	-18.35242445	-25.71913315	-15.37861051	-17.01694135	-2.002897216	-15.36809384
am106	SHF	ENVELOPE	1	0	1608.9358	4.817554213	0.464854519	16.35524986	9.198834504	22.27823283	13.2957218	12.44680463	36.83308697
am106	SMP	GOAT	0	1	2401.8402	3.250862699	2.421900422	5.787841198	3.101009517	5.757405335	17.81399116	-10.81159075	22.6850902
am106	SMF	WOLF	0	0	2529.892	3.341237151	1.719990989	-10.0992421	-15.5909758	-11.17020712	13.83292729	3.002149235	-18.27636027
am106	MF	CHICKEN	0	0	2596.3103	1.48450647	-2.260247084	24.66568782	20.72101502	42.52627365	49.97798819	-4.389647651	28.02055794
am106	SHP	CANOE	1	0	1872.6406	3.906945478	1.988529273	33.18427446	45.15298308	44.18024142	15.01809029	3.463892877	21.81009294
am106	SHF	LADDER	1	0	2572.057	3.585965135	-1.599604562	1.629272822	8.499618048	-7.223672781	8.315465298	-9.516161495	-2.41872838
am106	SHP	TURTLE	1	0	2682.748	2.903356861	0.756976396	25.43378309	52.05448532	-0.346184753	0.557191486	24.7351658	-10.62836951
am106	SMP	MUSTARD	0	0	2952.3251	0.515159083	-0.208429603	-18.69208395	-27.78514161	6.648763484	-20.01846532	-38.12906265	-1.808700845
am106	SMP	DOLL	0	0	2076.3897	-1.393345006	-2.196335341	-20.84480952	-14.09685769	-38.26924212	-20.44075646	-10.03990367	-31.27246135
am106	MF	TIGER	0	0	1400.2832	7.004177347	2.042410838	-19.83316864	-21.96627115	-43.09736779	-13.12482728	-0.379632446	-7.750429934
am106	SHF	LAMP	1	0	3008.0402	3.215548196	4.263070717	-16.68650973	-40.41070412	10.80188689	-5.672204449	-16.0953741	16.6438384
am106	SHP	BALLOON	1	0	2834.4373	4.514483358	1.347447512	-17.41121869	-30.39955575	-16.06343239	-9.209435973	3.706651222	-3.672422497
am106	SHF	PAIL	1	1	3040.0846	2.434447137	0.366761981	10.9852303	23.76858925	11.46424687	-6.186018189	-0.326261094	-8.272848975
am106	SMP	PILLOW	0	0	2351.404	0.891226695	-0.403278769	-7.970437626	7.374471538	-29.45517845	-33.34480206	-5.984953727	-16.62206998
am106	SHF	BIBLE	1	0	3300.4488	-4.088926362	-1.43460798	-3.638774065	17.10882319	-32.2075059	-16.69547125	-6.387655762	-23.26870907
am106	IF	SEAL	0	0	3209.0467	-1.192725941	0.800668077	11.65296872	11.65585908	12.11357363	26.90323687	3.288805272	10.01942008
am106	SMP	VIOLIN	0	0	2820.1011	2.086417844	2.906400664	-3.112714956	-13.59794803	13.38855963	1.077071813	11.05370331	-6.276341113
am106	SMP	PIE	0	1	2114.6205	-1.756542755	-1.255581642	-21.09242759	-17.98728224	-49.0215524	-15.30190995	14.46462317	-34.22557533
am106	SMF	STOOL	0	0	3386.3831	-1.14864576	-0.110358061	16.84002438	-1.536394984	30.53671967	31.61166585	32.02200544	34.19003226
am106	SHF	POTATO	1	0	3227.1546	-3.131482155	1.29213434	17.54151977	10.84452281	39.82768817	-18.78859663	25.04462991	25.85642242
am106	SMP	LIME	0	1	4163.7086	0.61316307	0.812088553	-8.396592343	-8.371198191	-13.86209358	14.56833279	-5.708146763	-17.9665402
am106	SHP	CAPE	1	1	2597.2662	1.513107651	0.685278994	11.22321539	13.28610077	19.16449766	7.556736766	5.099629515	3.303839014
am106	SMF	APPLE	0	0	2486.6682	-1.365060919	-0.188661319	0.792760721	9.971069041	-13.66079816	-11.36967897	-13.32853148	10.18093935
am106	SMP	BANANA	0	0	2243.0334	4.525620097	4.749994981	21.84056928	27.10863636	32.42659381	15.6441689	24.0432981	-5.477344124
am106	SMF	CEREAL	0	0	2099.1345	-2.46724718	-0.857850375	-25.31088605	-30.15664332	-9.155638932	-30.65820695	-12.06694643	-38.98480682
am106	SHP	FLAG	1	0	1830.2852	3.847841443	2.812341273	33.35066102	36.52757589	20.84216099	36.74575355	29.99816382	39.64755374
am106	SMP	MANURE	0	0	2434.6622	0.804240794	-1.08595162	-7.432671192	-6.883331924	-0.747873315	9.426592584	-17.62951132	-17.39864617
am106	SHF	SHOVEL	1	0	1819.4907	0.897788922	-1.065644581	-0.424677273	-20.87646968	55.33209321	0.767673726	-0.310590495	-4.709879711
am106	SMP	KITTEN	0	0	2689.5181	1.634720223	-0.464832144	-20.11370938	-15.33267058	-66.29777141	-13.12176112	10.37094271	-12.55442918
am106	SHF	TOWEL	1	0	2912.8866	2.579981267	-1.381662128	-37.23538391	-44.21805028	-56.17771232	-25.99105126	5.317182257	-39.77643971
am106	IF	FORK	0	0	2796.1156	-0.807300271	0.82494792	-4.559075421	-17.91728327	19.58535631	-4.210987875	-3.615424809	6.725147337
am106	SHF	FLASK	1	1	1940.2222	4.628083696	2.548429452	-16.94700743	-21.06946454	2.950192372	-14.29275269	-29.13740226	-18.05789135
am106	SMP	CAGE	0	0	2622.8157	1.986762452	0.771394925	-11.60333042	-22.6188946	-16.6449554	-17.39505845	2.662895849	18.34711164
am106	SHF	ROSE	1	1	3059.2785	2.346624629	-0.326380882	26.08939308	28.77500637	33.95550412	21.8028083	22.51810899	14.29928339
am106	SHF	CARROT	1	0	1970.7111	7.557422853	2.031779894	-1.474565421	-3.650852556	-17.20830907	-9.529760711	10.26981699	17.68253629
am106	SHF	PYTHON	1	0	1705.7287	4.158248972	1.20552172	22.37501907	19.87704358	27.14696035	8.529782518	35.03504804	20.58647352
am106	SHP	CAKE	1	0	3008.2209	6.063536696	-0.867107637	-16.39588545	-33.02333836	14.24982982	-10.36332638	-16.82135045	-4.83704559
am106	SHF	CHEESE	1	0	2206.1593	4.431755095	2.974984825	-6.290841993	13.5143788	-27.4254873	-37.67699195	10.63811893	-39.6616472
am106	MP	PAINTBRUSH	0	0	1421.3986	-1.072107376	0.406430035	-13.19160298	-24.92620741	-23.07163693	31.17425596	-12.95860911	8.522183665
am106	SHF	SWORD	1	0	1946.5323	3.47664281	1.431123907	-12.29577706	-18.21448882	-5.789103988	-18.95080242	-19.03825403	8.448859359
am106	MF	MUFFIN	0	0	2181.8208	1.425504841	5.012130723	-0.426542911	-16.34503056	16.9038986	31.5244528	-8.15596538	16.50158927
am106	SMP	CIGAR	0	0	3796.7256	-0.211181734	4.383974225	7.47039767	3.021974799	27.8947974	6.406749726	1.325296042	3.224004006
am106	SMP	LIZARD	0	0	2433.9715	6.553338416	0.799049537	27.08372104	53.54891433	-17.62690398	7.826250778	22.53434987	14.42398701
am106	SHF	TAXI	1	1	1715.7377	4.950490046	3.838928877	-3.797595044	-16.87104919	8.910831282	26.07917972	9.368116819	-8.59068037
am106	SHP	NEEDLE	1	0	2930.722	3.789603534	2.906353929	2.88855775	-0.308448138	10.28411865	-27.72612125	19.33246157	6.405434395
am106	SHF	PURSE	1	0	2310.7798	8.256298843	1.602884776	-6.725987981	-18.83875885	20.71619103	-3.155599114	2.033364077	-12.47224236
am106	SMP	CANDLE	0	0	3095.3804	-2.172534432	-0.867826352	8.263513026	19.83432194	-16.61935189	-12.89068812	1.75529673	20.82941775
am106	SMP	BROOM	0	0	2831.8247	3.571893632	1.505148177	14.01934103	18.06062593	14.42523098	26.96366027	13.69859821	-6.225358455
am106	SHF	HAM	1	0	2548.8534	2.213600213	0.411574262	0.754366429	7.120518827	-3.660238687	-7.101765732	6.3784163	-14.2941636
am106	SMF	ELEPHANT	0	0	2509.0408	-3.355756398	1.213175791	-1.79863094	6.601369256	-26.47865538	-27.34202012	16.86406123	-0.828954895
am106	SHP	TRACTOR	1	1	2483.1388	6.302554878	0.922045787	0.256806125	-9.250003276	-9.254787913	10.10798506	17.99943907	18.43111643
am106	IP	ROCKET	0	0	2751.875	-0.714308122	-0.920455437	-7.83705231	-0.803137803	-15.14436402	-19.99280446	-14.52640903	-7.369561602
am106	SHF	CRAB	1	0	2636.0509	6.245396225	0.898862929	14.63063193	9.477010914	14.15444603	-0.754488163	21.12136828	34.01078455
am106	SHF	CORN	1	1	2832.0814	1.362951581	3.102583236	-11.39937146	-2.07368406	-17.77603817	-36.39508896	-21.71442311	-8.15670956
am106	SHP	ANCHOR	1	0	2871.4949	1.508438015	1.906910848	-17.92709419	-11.00972683	-31.48557761	-5.159962199	-7.801107914	-40.11022436
am106	SHF	MOON	1	1	2536.8864	0.576542244	-2.207624741	15.86344964	24.42489693	34.47073944	-2.110083383	-5.777614592	-1.810960239
am106	SHF	BACON	1	0	1935.4148	2.177369907	0.531520689	10.87461778	-7.682127231	13.63008088	33.74863368	24.09924552	38.92643937
am106	SHP	JELLY	1	1	2752.4313	0.814126577	3.20615231	43.27520965	57.54545051	36.41313854	18.83601111	36.41942244	28.2637259
am106	SHP	SHEEP	1	1	2590.45	4.0310902	1.600586961	6.057682799	17.70075309	-5.057327543	-0.655511883	0.717580544	-7.610414243
am106	SMF	RAILROAD	0	1	2612.9532	-5.06290068	-1.614577581	-3.306013893	-32.82684177	35.57026294	30.60025055	-19.11356518	36.31512762
am106	SMP	QUILT	0	0	3111.9757	0.72173453	4.97872959	34.04775477	28.98787739	65.74730951	28.51244341	1.538611002	45.68809079
am106	SMP	GUITAR	0	0	2307.1053	-1.619624853	-4.57820238	10.13662253	-2.052372248	27.48184673	17.97796365	33.31474088	0.587627121
am106	SHP	LION	1	0	2735.8487	0.43763585	0.802360412	-17.78922104	-18.11234229	-15.06313687	0.0913478	-34.3369306	-14.95721963
am106	SHF	NEST	1	0	3355.4586	-3.72531507	0.653082823	-28.67355077	-44.3756802	-34.32236617	-15.41340193	-5.290641743	-3.318257497
am106	SHF	PIANO	1	0	2849.2128	-0.871144221	0.146736714	-9.330101893	-11.9520213	-11.53690804	0.203231338	-2.733214012	-10.4213428
am106	SHP	SCISSORS	1	0	2752.0558	-0.576954272	-1.20771046	8.246442995	11.78273114	5.715650335	13.4511891	10.51935755	-4.835018375
am106	IF	NAPKIN	0	0	2570.7578	3.504222237	2.023487645	-15.91741538	-30.1437455	-3.664955153	-2.731451746	-13.17734457	3.008440286
am107	IP	SPOON	0	0	2728.5358	-2.800040616	2.415599553	3.236104405	13.2678853	-15.78522387	-8.733223041	-1.642579102	-4.88811553
am107	SMP	BACON	0	0	2503.5887	0.072714674	0.06517337	-36.22980206	-41.67056577	-27.8945172	-26.84689032	-48.11109907	-13.04117553
am107	SMP	SHOWER	0	0	3185.6241	4.658358832	0.077104432	1.387934516	-1.594434262	-8.139607048	29.51670651	-2.793141513	8.112970574
am107	SHF	CHICKEN	1	0	2046.5651	0.278366599	-0.321016919	-5.473730255	-3.845146966	-2.924982328	-14.99501036	12.70162633	-31.75496496
am107	SHF	MONKEY	1	0	1940.3986	-1.110935932	4.940632574	-1.398550237	-6.605838182	-15.48469818	27.66325793	11.36515224	-0.55912204
am107	SHF	CAGE	1	0	1988.8783	1.541335202	1.152722203	-10.66891539	-11.52636513	-7.375911968	-4.230339949	-17.60350418	-7.562896243
am107	SMP	DIAMOND	0	0	1510.6806	-2.00053147	0.860212776	-7.985556463	-13.82749132	28.27712145	2.283338997	-8.595696032	-34.36894465
am107	SHF	TRUMPET	1	0	2380.9343	2.621606446	0.148781024	9.630775156	7.074052532	13.39133644	0.691334842	11.98181797	22.71495752
am107	IF	PILLOW	0	0	2379.9775	-0.302990686	-2.125277691	-3.211084959	-5.468611994	-17.18272626	-2.88185118	-10.20582978	34.91356413
am107	IF	LIME	0	0	2399.2188	3.132809456	-0.810870859	16.34721704	13.2635598	32.92498555	11.84400004	13.55114393	18.09507856
am107	SHP	CEREAL	1	0	2242.1319	0.132709586	3.68591875	-0.731495248	0.228859963	-3.566107487	-2.665601508	-7.944861431	9.297853866
am107	SHP	MUG	1	0	2176.849	0.463805461	0.860063663	-34.10742561	-39.80772646	-35.9845801	-39.01830817	-29.67743288	-4.453708205
am107	IF	HOSE	0	0	2449.7929	-2.20168265	-1.34977825	0.442401589	1.571003994	3.42748869	11.99888832	-1.34156501	-17.38116065
am107	SMP	BELL	0	0	2183.5541	4.759771335	0.633099064	-6.185521032	-5.204418861	9.702411085	-5.136857676	2.651247098	-44.07891748
am107	SHF	ARROW	1	0	2851.9081	1.17579904	-0.911180937	3.940560096	3.8311317	16.92998021	-0.826321075	11.16921431	-17.3114541
am107	IP	KEG	0	0	2464.0646	0.59436742	-0.118343333	4.159738551	9.842832201	8.911926838	-11.43312676	-7.093316411	-1.362353688
am107	SMF	PENNY	0	1	2155.047	1.292206663	2.4387042	18.80871449	13.83245424	54.09595983	23.80879635	-0.007356606	17.88677796
am107	MP	SHOVEL	0	0	1358.6191	3.0857534	-2.898199937	-8.872819077	-5.399472187	-3.259710933	-32.98562601	-13.93865417	-4.667875988
am107	IF	COUCH	0	0	2431.3435	3.424523498	2.729701301	16.87954193	26.27866691	20.10894983	-8.842562484	1.636768347	9.292578138
am107	SHF	TURTLE	1	0	2373.4625	-1.773207493	0.506676429	28.67488472	30.38553857	35.79031264	28.34536328	3.925986188	43.41180114
am107	SHP	BARREL	1	1	1904.8386	-3.457762468	-0.072564975	20.31827017	22.03286425	28.7575789	2.799926056	13.55568854	25.77998522
am107	SHF	HONEY	1	0	1902.7941	0.881411171	2.301879288	-13.94415464	-24.81875909	-16.23311488	13.52261401	12.05518684	-15.79731884
am107	SMP	BOOT	0	0	2600.8592	-1.39628617	1.774204963	-12.991475	-14.10853772	-24.02594047	-16.46555978	-9.851352463	5.970808776
am107	IP	RABBIT	0	0	3031.6873	3.92717986	1.711280224	-1.021837847	-2.895125372	-2.487371143	2.248162846	30.25835368	-33.45137671
am107	SHF	OTTER	1	0	2661.9695	1.661533599	0.792129411	-19.64182275	-22.68556185	-17.31743644	-15.50981682	-11.55572168	-21.76924745
am107	SHF	SYRUP	1	0	1405.1276	1.175247228	3.606678162	22.4376605	21.38828124	43.67604734	40.59561998	6.882466009	3.709351276
am107	SHF	JELLY	1	0	2471.4811	-2.030869428	0.633070337	-7.695206906	-18.88216802	-2.304133009	22.88394769	8.709034668	-8.312217398
am107	IP	BROOM	0	0	2169.6129	-0.088494024	1.35592458	27.23281583	35.96645721	30.78843513	0.339398314	8.629926071	27.99420425
am107	SMP	CHERRY	0	0	2396.1897	0.433243081	-2.27504575	-30.28131148	-24.55836205	-44.76078139	-63.14542805	-24.74114401	-17.05557603
am107	SMF	TRAY	0	0	2173.7571	-1.400471088	-0.746266967	39.38707542	44.63505819	52.29525688	15.96266075	25.57643348	36.03397203
am107	IP	FAN	0	0	2490.505	-0.678744986	2.265548212	7.546515588	4.64248603	26.73169312	10.34700967	8.951464935	-7.164662906
am107	SHF	DUCK	1	0	2064.6606	0.810569063	1.046888055	-14.58991151	-20.53301088	3.659764253	-23.669716	-14.84036208	0.180887953
am107	SHF	TOWEL	1	0	2860.0935	-0.841787757	-0.249239125	-5.348148412	-5.128420736	-14.26127829	23.76267939	-25.27608934	4.160961053
am107	SMF	MILK	0	0	2500.1168	-3.077134223	1.854243871	12.58459655	8.282071536	28.08692954	-4.002179185	20.0443499	19.6100371
am107	SMP	HOOK	0	0	2508.0237	-3.283734158	2.450588334	15.10131934	11.55462784	20.88817133	21.59237561	18.83547482	14.49242356
am107	IP	FLASK	0	0	2205.5593	-1.490493668	-1.559603053	8.762813698	19.45745301	15.61635987	3.458270489	-10.51866881	-23.5409638
am107	SHP	CRAB	1	0	2493.4377	1.666136582	-0.120696106	-1.359938751	-8.276370229	18.61341779	-3.365195724	-2.173387483	10.2553033
am107	SHF	MAP	1	0	2674.2367	2.862262779	0.470969488	-15.68456271	-16.21847681	-33.59620978	-10.83586687	-6.581257078	-6.163629255
am107	SHP	BRAIN	1	0	2264.4538	0.245612097	1.128805696	18.5543321	24.31892104	-6.297179887	2.177338642	48.21438364	-1.565819529
am107	IP	STOOL	0	0	2613.4969	3.307023794	1.125795824	-11.59406723	-10.8069439	-9.440316273	-17.51652504	0.058868708	-28.00024878
am107	SMF	FENCE	0	0	2321.2474	-0.643084647	1.794029773	12.40869843	13.04000862	24.76023986	10.95146213	11.43337723	-4.101465049
am107	SHP	CANE	1	0	2728.5378	1.751845953	-0.458058953	-0.545829271	-6.466123445	10.21773013	8.263297833	4.87495001	-0.06638534
am107	IP	ELEPHANT	0	0	2052.4597	-1.606968489	0.479610369	0.30685882	4.514008699	5.458312317	6.099060375	-32.51210693	9.968622517
am107	SHF	GOAT	1	0	3531.5892	-1.321384935	-0.150215109	-5.686568543	-2.637215984	-9.166186493	18.29356169	-37.66434107	3.062225813
am107	IP	RAILROAD	0	0	2478.6022	-2.723565225	-0.163456237	34.68643147	48.45920495	35.01395202	29.51590124	7.608273769	5.463383011
am107	IP	BASKET	0	0	2212.8092	2.342434352	2.00017642	4.550129336	11.65838177	18.68373844	-15.79611844	-18.94686418	0.080608509
am107	SHF	MOON	1	1	2060.454	2.750331233	0.039274658	8.801126526	-0.860044728	-9.042713292	13.9505013	33.06429559	43.82060938
am107	IF	MOTH	0	0	2139.8139	0.848284954	-3.154549404	13.52920286	26.34370777	3.404850728	-9.22761925	5.043451458	-5.362185604
am107	SHF	PENCIL	1	0	1789.6307	-2.272055532	-2.019435187	-5.857530829	-21.63783812	7.937244671	7.062925664	4.5895466	29.61013666
am107	SMF	WHIP	0	0	2311.2949	-2.122296677	-2.553848656	28.74863829	39.34986315	20.52273238	8.694768461	7.853014768	32.09567745
am107	IF	CORN	0	0	1999.6592	1.878897036	1.060225538	10.40098054	13.46654201	14.24159274	-2.222343192	23.66932813	-15.48765357
am107	SMP	PIE	0	0	1809.5109	1.652928847	0.593771052	16.22482588	12.98308768	10.31857843	24.2139474	12.44339488	37.60075125
am107	SMF	PARADE	0	0	3220.7653	-2.976926485	1.374036894	2.576735173	-2.225962256	30.75501544	-2.278545023	3.371349822	-6.433778729
am107	IP	KITTEN	0	0	2623.6749	-0.020171967	4.885286944	9.989191739	16.13900554	-14.44938893	11.58482031	-6.620389758	31.00184175
am107	SMF	COFFEE	0	0	2478.2895	-2.294805413	0.289357965	-5.863098627	-1.874570939	-8.607296837	-2.499908275	-11.77412555	-17.64399601
am107	SHP	CROWN	1	0	2463.9503	-1.527708167	-1.681376477	-0.593898456	-1.770521657	-17.6698481	34.53263479	9.728624663	-18.42829484
am107	SMP	PYTHON	0	0	2137.0069	-3.073441848	2.008863562	9.039459998	8.958055712	-0.344674004	16.69854471	19.5318693	0.880813062
am107	SHP	MUSTARD	1	0	1930.9257	-1.270417998	1.60002355	-6.705293253	-9.288397675	8.332424598	-7.306436451	-26.24596849	12.70694551
am107	IF	FLAG	0	0	1778.2455	2.250476337	-0.766733321	-7.717936634	-3.622817404	18.10813789	-20.56315003	-42.73822535	-4.191384892
am107	MF	PAINTBRUSH	0	0	2375.9684	-1.689429163	1.821804822	-28.64794754	-39.14159133	-25.41921144	-23.90543957	-4.925706678	-15.63777316
am107	SHP	CASTLE	1	0	2261.6317	2.183622388	-3.980338101	-9.188806163	-13.06820891	-3.252328132	-6.869747055	-2.363064699	-8.504831709
am107	SHF	ANCHOR	1	1	2158.4898	4.623929433	0.997222921	32.98667779	53.12664385	16.76305563	12.24908686	4.442358775	9.6213537
am107	SHF	DOLLAR	1	0	1783.54	-1.811226445	-2.874037441	-26.87194047	-42.75840727	5.403610844	-26.0898611	-12.12807721	-9.168410846
am107	SHP	UMBRELLA	1	0	2317.9167	-2.440889503	-1.781105849	19.33361575	24.72745563	20.68012526	6.983203101	29.51868768	-11.19847108
am107	SMP	APPLE	0	0	2809.3412	-2.097113149	-1.341713773	22.92873809	35.04428035	30.76610735	-6.178958021	10.57498529	-4.814490927
am107	SHF	SOAP	1	0	1484.1916	3.053841297	1.066598223	0.505394582	-8.841819733	25.29841343	11.83290929	-10.45989302	18.93824702
am107	SMP	CAKE	0	0	2047.7283	1.081046075	2.213782145	-22.44636227	-19.17831315	-21.48176754	-18.4690901	-33.74687674	-28.98445122
am107	SMP	TOILET	0	0	2906.5332	-2.15273436	-1.841767759	22.11855864	23.49868512	43.65826168	15.18186895	3.85978901	17.5080899
am107	MF	DESK	0	0	2688.784	-4.215613752	0.916708773	10.36966763	19.01726575	-5.97185386	-5.922591384	3.186134418	12.67144446
am107	SHF	MANURE	1	1	1677.2105	0.904281465	-1.158967746	25.35759247	34.39388742	31.12727981	2.605151119	14.41379808	7.972963388
am107	MP	STRING	0	0	2944.1342	3.196454337	-1.078171297	-8.089141162	-14.06402824	-5.602971034	-1.564734288	-6.450035601	10.3857415
am107	SMP	CIGAR	0	1	2096.1228	-1.121704025	-1.151745025	16.3072123	3.854407856	25.24497412	54.76761271	16.34258936	31.44253469
am107	SMP	SEAL	0	0	2377.082	-0.68989579	-0.672741613	-7.137181594	-11.94242309	0.435124111	-26.45618687	4.433534011	9.823946357
am107	IP	KETTLE	0	0	2670.122	2.035358673	1.974310709	24.0295034	29.56136886	21.95238761	9.06723747	13.97612741	25.9511515
am107	IP	NEEDLE	0	0	2298.5711	-1.476586167	1.794591544	3.750352721	-3.370471273	24.878932	-3.847712223	27.17061017	-11.45788553
am107	IF	BENCH	0	0	2940.9266	-0.308091149	-2.934390343	-6.3214508	-14.66582256	1.301350973	-16.65196218	1.763255388	24.49432194
am107	MF	HAM	0	0	2937.6684	1.730415195	2.313412748	3.951119075	6.698773993	-0.114475965	10.26986031	-12.53875902	11.103277
am107	SHP	CRADLE	1	0	2730.5823	0.1711449	0.003252223	15.05676099	12.41508606	23.5347822	20.78522698	8.760698912	20.19190474
am107	SHF	ROSE	1	1	1814.1062	3.743977787	2.038973567	21.39345006	31.6599141	30.63910581	-2.691073294	0.207716878	7.914770737
am107	SMP	LAMP	0	0	2330.5435	1.498086289	0.602219422	41.746185	55.39485266	43.53317728	20.60929922	24.61797044	13.03282082
am107	SHP	TROPHY	1	0	2360.8675	0.536261421	-2.157806248	-25.78109392	-43.78367207	-4.415510811	-28.40600279	12.84444951	-11.31398012
am107	IF	SOCK	0	0	1637.4401	-4.476226204	-2.692941106	1.221104383	3.74238174	-5.236720304	-14.57823202	6.043816206	5.270206098
am107	SMF	OVEN	0	0	2842.5284	-5.274909696	-1.451908827	10.41565374	4.799161548	11.38141707	25.04432452	34.01865614	-6.953775483
am107	IF	PIANO	0	0	2072.6546	1.487171576	-0.368932367	4.904563451	10.39769741	1.368886188	-17.03174467	16.50773288	-12.82212325
am107	IP	SHEEP	0	0	2243.264	0.784404479	1.863651907	-6.68131778	-13.67705435	-1.999594778	3.68944748	-1.304233582	5.64846764
am107	SHF	STAPLER	1	0	2372.1925	-1.465027491	-1.871896001	33.85639878	54.02648487	23.6779735	15.44177414	-13.01609392	24.21129199
am107	SHP	BONE	1	0	3663.8746	0.280039948	-2.665992296	17.1011014	18.56553181	50.41981856	-0.115386373	-6.592925999	13.37906744
am107	SMP	LION	0	0	2127.3563	-3.962305723	0.59742833	-13.88759023	-19.68737716	-7.820362645	-7.977863909	-7.509385358	-6.511198129
am107	SMF	OMELET	0	0	2578.5743	1.523552457	-0.805692896	11.69392699	9.932887997	16.44225976	-1.831859878	17.39893023	19.3941694
am107	IP	LIZARD	0	0	2756.9206	-2.008134855	-3.231543235	-16.71971917	-31.42037275	-10.76179706	-12.79204199	12.60621527	7.233013147
am107	SHP	ORANGE	1	0	2167.8521	-0.397630307	-0.387707107	-5.643705602	-4.162394343	-16.46734361	5.575859085	-9.704099117	-4.10577929
am107	SHF	GLASSES	1	0	2329.1042	0.724412285	0.872885645	3.573500882	0.465160862	35.38298284	8.693575476	-8.803483267	-10.65982103
am107	SHF	TIGER	1	0	1781.3997	-0.65690072	2.869363493	3.378951194	1.783578307	-11.68897532	-6.795472709	6.353789998	36.33281097
am107	SHF	MOUSE	1	0	1969.4352	1.888906593	-2.55042348	-17.28866238	-27.92397472	10.5458024	-18.17528801	0.361116426	-22.30180411
am107	SMP	MITTEN	0	0	1388.5697	-1.258931946	-2.088892365	-0.339991422	2.454748091	-7.488808081	5.348788726	2.96086945	-14.58425158
am107	SHF	BANANA	1	0	1936.1235	-2.486268241	-0.080255346	29.04258836	32.33564546	43.34403794	5.505735135	23.25035183	23.32852994
am107	SHF	GUITAR	1	0	1638.5143	-1.340108262	-0.613741086	34.51724262	44.77198069	31.15847	24.64941584	16.26071577	20.48519601
am107	SMF	WINE	0	0	2237.8352	-1.335682975	-2.206440071	-31.03566785	-31.06718643	-38.83397862	-19.58472593	-42.17391959	-16.86769607
am107	SHF	PLATE	1	0	2065.7909	0.247118535	4.130219429	-23.84140357	-26.89675062	-55.14843512	-2.104807216	-4.074062282	-13.83723743
am107	MP	QUILT	0	0	2221.4195	-2.116274802	0.030587014	-32.36741037	-44.08968747	-16.43573768	-27.43923541	-19.56365033	-15.62298152
am107	SHF	DOLL	1	0	1847.0908	3.144499132	0.242607357	-6.0157976	9.114257703	-28.24488378	-28.43477092	-14.67177405	-20.90871751
am107	SHP	VIOLIN	1	0	2373.4107	2.049724359	-0.067018767	-17.96130542	-18.96206151	-6.428383271	-32.1892186	-30.78139349	1.901026145
am107	SHF	BALLOON	1	0	2539.5971	1.425492201	-2.362267588	-12.21886382	-18.74507525	-5.58851417	0.368445777	-8.894914316	-4.125958407
am107	IP	CHEESE	0	0	2713.8778	1.170466581	-2.575892717	-24.22114136	-37.15751896	4.309220411	-23.91903528	-9.438733038	-16.01283803
am107	MP	PAN	0	0	2882.7157	1.260159623	1.462057481	-16.59628066	-20.25167386	5.024661102	-26.20283583	5.763696467	-46.51442946
am107	IP	HAMMER	0	0	2145.348	0.913061338	1.511636192	-5.762142495	-12.79164595	6.804326611	9.713741904	-12.7314693	7.888717479
am107	SHF	NEST	1	1	1943.2376	0.226876589	0.332788839	10.04206532	15.74677651	-7.383086121	35.44973454	-5.701468325	1.142730194
am107	SHP	NET	1	0	2353.6069	1.480886334	2.461630918	-9.161518965	-13.06138814	2.295201986	-4.070807935	-7.729054511	-11.0548632
am107	SHF	TOAST	1	0	2299.5465	2.355362206	1.492559466	2.741821493	2.30094247	14.34517156	-1.906313133	11.73597085	-17.46787665
am107	IP	DRUM	0	0	2674.3465	-0.359177008	0.485488886	-22.50916159	-19.66153766	-52.66044418	-1.056358132	-22.92413426	-16.97340158
am107	SHF	OYSTER	1	0	1954.4972	1.491377328	-0.836691947	5.658142288	12.28491172	-10.05046879	8.625937056	-9.734399311	10.15631241
am107	MP	HIGHWAY	0	0	2618.2037	5.063191689	-0.566291581	-12.52743346	-19.90864271	-4.262061696	-0.468690243	-12.63389558	2.667075217
am107	SHF	SPONGE	1	1	1990.7714	3.281663551	-0.205784329	-9.14225106	-16.02457658	27.74820771	-22.26542231	17.88772658	-45.52078206
am107	SMP	MUFFIN	0	0	2010.3134	-1.033694885	1.767095826	-9.474088603	-18.75457371	28.80590756	-0.625705536	2.108819459	-35.83945216
am107	IP	CANDLE	0	0	1823.1694	3.573913339	-1.093286149	-6.131060871	-0.781103905	-13.53442634	9.429481573	-15.36074442	-25.61047758
am107	SHP	PAIL	1	0	2357.2004	-1.67116894	-3.903501108	-8.854666695	-14.84541613	-37.75483833	28.53344038	9.24142173	0.444697678
am107	SHF	LOCKER	1	1	3987.7076	1.751837739	-0.285290306	7.705155691	14.18480555	13.96049515	-25.06354178	6.244620326	-0.641360645
am107	SHF	BOWL	1	0	2576.0016	-3.723115441	-1.751138504	0.558033459	-3.563730712	8.651911138	14.97253964	6.26881207	-10.03276446
am107	SMF	PURSE	0	0	2428.1384	3.38452365	1.772004859	23.91848985	26.60929928	22.97808025	43.56797755	-1.557299139	26.71240434
am107	SHP	CAMERA	1	0	1722.5839	-0.340444845	0.488896311	24.52176798	26.1747836	32.05504678	21.87648125	11.99398831	25.25260015
am109	SHP	CLOCK	1	0	2471.0231	1.629054417	-0.395086999	11.72684909	13.98264365	4.706002498	11.72732947	13.46399241	8.26636391
am109	SHF	BACON	1	1	1284.5888	-2.552918381	2.925360921	15.11137651	22.83914422	25.2881462	-14.87555013	5.100310232	3.610632922
am109	SHF	HOOK	1	1	3105.0527	0.845490341	0.991941697	14.44515559	22.54052338	-13.22270762	5.530193975	35.20534648	-4.255314936
am109	SHP	WHIP	1	0	3113.2848	7.023575282	1.136155724	6.396184188	9.317691764	-2.91708633	-9.926068893	1.586457641	19.09175566
am109	SMP	TRAY	0	0	4131.5663	-2.594990481	-3.921440772	-12.94316347	-18.16687238	3.242085601	-45.6416544	-4.249316565	2.841604327
am109	IP	STOOL	0	0	2030.9254	-0.080194401	-0.458534909	-10.81770117	-15.60926623	-7.428495178	8.523114294	-0.185331579	-18.03473145
am109	MF	COFFEE	0	0	3081.3236	1.520868688	-3.008563043	-9.237969359	-5.579818236	-29.50556173	37.0294605	-19.93927706	-21.36942358
am109	SHF	LIME	1	1	1587.2631	6.257970298	2.480978196	6.345861907	-4.973910299	-4.884499906	51.67248672	22.03652234	17.70184727
am109	SHP	RAILROAD	1	0	3396.8346	0.163771716	0.421233963	8.132648361	13.52016879	5.713442445	24.01370312	7.468328526	-19.34537931
am109	MP	HAM	0	0	4722.226	2.348251399	0.08099085	-0.599227102	2.291166198	3.72601344	-26.25520571	18.18556917	-18.55734936
am109	MP	DOLL	0	0	3868.3243	-0.455551718	0.984363984	-7.543360317	-18.21645761	5.499135214	-10.13657649	18.12122267	-2.83799842
am109	SHF	MUSTARD	1	0	2626.9361	-1.77655194	0.270335008	9.557683954	4.959013933	29.84516937	0.297172567	2.058630742	20.29907103
am109	SHF	SOUP	1	0	1702.1887	-1.647211663	-1.871750119	38.58663356	47.86110974	37.95547052	11.59079797	20.23979803	38.09793894
am109	MF	DOLLAR	0	0	2274.6398	3.557114696	-1.816552282	-10.67496375	-13.55869607	-20.4749237	5.338572998	-0.218753486	-10.01324337
am109	SHF	MONKEY	1	0	3329.1201	1.120654734	3.804138061	6.625836823	8.9947183	46.40739843	-28.11158955	-26.90922071	12.50805107
am109	SHF	SOAP	1	1	2143.0831	2.788191085	-2.272406127	4.68315466	0.822849881	3.095600106	24.03896002	15.13281673	-1.04306692
am109	SHF	LION	1	0	2675.0947	-0.381205089	-0.13616761	7.225157705	8.830229301	9.613379817	-15.78068135	11.56701263	8.618307558
am109	SHP	TRUMPET	1	0	2952.4086	2.108248461	-1.395893947	6.705240129	24.35836696	5.172481455	-37.31366647	-16.07690255	-10.31040366
am109	SHF	CIGAR	1	1	1449.0664	3.822475815	0.926003761	14.56082974	17.05089344	0.398428331	6.897757659	12.26813861	25.89950508
am109	MF	PHONE	0	0	3303.8852	0.980680133	-1.958456991	7.268890984	5.423283712	11.37349885	48.43516643	14.13472377	-21.74726877
am109	SHP	HIGHWAY	1	0	3331.2911	0.928050013	2.26317977	3.493895603	-11.50134972	-6.802180004	38.04567478	38.1928254	16.11335064
am109	SHP	ELEPHANT	1	0	3060.1886	0.5055179	0.432315073	-12.64281856	-28.6025358	-15.27495146	-11.69103562	36.63242926	2.57109395
am109	MF	STAR	0	0	3321.6127	0.293473157	0.003463938	-12.51675307	-17.50405811	-6.203651138	-18.24563049	6.185683881	-14.31528416
am109	SHF	PENCIL	1	1	2818.6518	0.893435438	3.983619439	19.56975833	-5.067898449	70.9949459	20.98347485	47.50218715	35.49531227
am109	SHP	FENCE	1	0	3548.4208	-0.924391233	0.251090255	-7.73431139	-8.148538693	-4.411570401	-0.716958974	-9.272341672	-12.23270954
am109	SHF	JELLY	1	0	1453.189	1.840786441	-3.119446522	13.74311976	16.39325905	25.81889944	24.02839916	-15.09808467	13.52416213
am109	SHF	WOLF	1	1	1595.3886	5.980580355	3.252355505	-2.309271208	-1.691513877	0.339363657	-6.562241578	-6.18461299	-0.885864416
am109	SMP	PAIL	0	0	2132.9774	3.161081504	0.17665228	5.105512061	-3.650432532	4.187465243	45.08312213	18.08752677	2.377918625
am109	SHP	KITTEN	1	1	2100.6873	-1.012219731	0.736985219	27.33685477	30.59351098	47.73111228	9.24054745	-12.38494143	44.7116746
am109	SHP	BOWL	1	1	3617.1225	3.511856566	-1.153064647	-16.77051049	-16.28264692	-14.50978288	10.62302547	-44.55707311	-10.56601128
am109	SHF	UMBRELLA	1	0	1430.2495	0.424212131	0.141097655	30.27873991	37.62706469	31.88861973	27.67165553	0.469201453	31.18443374
am109	SMP	TOWEL	0	0	2641.3693	2.215729663	-3.132273491	3.161250252	4.459321709	17.87937501	-9.328988232	0.74301547	-6.279394263
am109	SMP	SOCK	0	0	2061.6523	-1.594020699	-1.194737743	6.120532817	0.9840021	16.30310902	-0.227099151	20.25196894	5.935549395
am109	SHF	GOAT	1	0	2391.009	0.172662026	-0.798995992	29.37349172	36.05791939	38.88025485	-6.033279252	11.21476996	33.85647794
am109	SHF	TAXI	1	1	1965.0312	4.72861574	0.625671388	-16.7445782	-31.45020214	7.945152352	4.21885008	-23.23416668	8.944450779
am109	SMP	JACKET	0	0	1745.7504	-1.805824166	2.852794022	-13.53212673	-19.70958734	-4.278533891	-33.06906897	-0.494630206	0.397735732
am109	SHP	WINE	1	1	2315.3801	1.180902127	3.537381897	20.32087835	28.98715191	12.11463801	10.12230707	-13.67607142	34.60148854
am109	SHF	STAPLER	1	0	1824.4824	2.008498952	0.208734755	9.211413779	1.298410098	14.01026536	8.998579366	25.34873416	19.27455736
am109	SHF	LADDER	1	0	2630.4353	-2.997819848	-0.900336143	8.424533654	0.673964537	23.59552484	10.03573397	17.58225616	13.34520637
am109	SHF	CASTLE	1	1	1913.9324	1.893704259	-0.228036988	14.71032704	2.550705684	10.44612572	35.56591369	34.21330608	33.77600303
am109	SHP	PILLOW	1	0	1886.8127	4.17130541	2.714765416	4.251490714	11.38930607	10.42360369	4.010932992	-19.93108652	-5.491204818
am109	SHF	RABBIT	1	0	1493.281	1.660774031	-2.711994456	36.06948896	40.51376313	43.8667811	22.37180989	22.09210431	33.39491166
am109	SHP	BALLOON	1	0	2602.8223	5.210240227	3.647739241	-3.842577869	-16.78335625	13.50309234	-8.200204838	23.85094625	4.449557683
am109	SHF	PARADE	1	0	2516.1133	2.994385576	0.167785499	11.8626952	21.68088572	3.757768138	-6.219278394	-1.00814981	5.799961507
am109	SMP	CROWN	0	0	4036.8552	0.060273529	2.618640058	26.05942184	38.80807624	16.22823159	-1.849188152	2.879248939	26.55986807
am109	SHF	BASKET	1	0	2015.3636	3.599842611	-1.09686823	17.46209028	3.376416845	36.0548239	12.19621072	51.26225093	23.51614025
am109	SMP	TIRE	0	0	2730.7439	-0.582837418	-4.150903945	-19.78183915	-26.24848508	-8.330933229	-32.35270877	-16.9615896	-1.200273836
am109	SHF	MITTEN	1	0	2173.5578	2.111952933	0.296954527	35.29819863	38.50261555	47.60183788	29.6734682	13.2888952	35.83818213
am109	SHF	CHERRY	1	1	2397.4657	4.309300441	-0.090575221	-5.515838022	-28.96272233	-0.821983933	11.81422469	41.56400527	23.34718544
am109	SHF	COUCH	1	1	1589.1733	4.178349562	-0.368099451	10.10835198	8.889186596	38.49506291	20.21867949	-11.31258751	1.552070315
am109	SHP	OMELET	1	1	2603.1349	5.614244844	2.79777534	26.14016527	35.26489792	6.744854671	26.4359514	-14.28478761	49.50796248
am109	SHP	LIZARD	1	0	1967.9452	3.944685187	1.352619201	21.49419926	11.38983136	50.04292939	33.10126346	20.06611543	26.48682911
am109	SHF	MOON	1	0	2745.7459	-0.111343737	0.41659398	13.97267309	21.3348847	18.62190257	-22.27466942	15.24151338	2.147318771
am109	SHF	ORANGE	1	0	2227.8239	-2.329067654	2.778674822	-5.997837907	-23.98282236	13.43942453	2.887660831	34.1899962	-0.737446193
am109	SHF	MANURE	1	0	1941.5043	2.465679893	1.741707339	-19.53876427	-37.63959709	6.348613961	9.62349202	8.510437057	-20.80380176
am109	SHP	SCISSORS	1	0	3983.6667	1.461259506	1.651839875	5.130610854	3.79366044	10.17209311	19.58076686	-14.56536637	15.67389163
am109	MP	TROPHY	0	0	2750.4919	-4.90602121	-0.894112071	-6.632708033	-9.168548539	-18.90814491	6.242581827	-0.242570346	1.040643402
am109	SHF	SHOVEL	1	0	2716.504	0.804670445	-0.092773728	8.665171725	7.881954524	-8.053955375	15.53514187	8.188499687	24.39048246
am109	SMP	BONE	0	0	3195.4376	0.061852085	-0.249278413	-26.27148883	-60.93749568	-8.330557379	9.081227739	23.19721644	19.26783605
am109	SHF	MUFFIN	1	0	1637.9825	-0.237923606	-2.145901474	33.12030602	35.49787894	21.2884207	42.52733836	37.96770819	25.09601717
am109	SHP	SHEEP	1	0	2185.0688	2.610617549	-1.610458555	17.61563117	33.81346142	-1.586769651	12.45825118	-9.062643409	3.488261699
am109	MF	WALLET	0	0	1768.561	2.17495074	0.775882465	-14.50448697	-17.66186617	-20.7430237	-24.63986064	-7.20673696	2.896381635
am109	SHP	TURTLE	1	1	1692.6641	-1.163231124	-0.268043534	11.40653571	4.156709732	16.5414093	24.22603943	15.0887442	22.74391849
am109	SHP	HOSE	1	1	1928.9464	4.494915872	0.754826466	7.209459457	20.50341879	-0.350781525	-5.439100754	-9.536015926	-12.32048863
am109	SHF	GUITAR	1	0	2556.1496	3.834551248	-1.217109572	-9.437167079	-17.92042948	-10.48959744	-3.969907874	16.2946584	-4.297823672
am109	MF	HAMMER	0	0	2160.2757	-1.890334707	0.750720245	-17.90486684	-27.31026123	-28.63023126	22.45185389	7.203010038	-20.56407446
am109	SHP	CAMERA	1	1	3057.2092	7.543368148	3.997571548	19.14112462	15.85088471	61.19306726	-8.643163697	11.38165744	15.06319542
am109	SHF	BIBLE	1	0	2035.1404	0.1612353	-0.588021895	12.88117363	8.535683303	14.02671775	0.128004943	24.55390632	24.90915759
am109	MP	SPOON	0	0	3048.3822	-0.938425262	0.157187394	20.62210839	22.46310481	14.47268933	0.195520657	25.37948667	27.52620828
am109	SHF	NAPKIN	1	1	1982.5201	2.719758101	1.467618183	29.31204081	31.66404665	21.89858196	1.466919989	48.99574519	25.46313126
am109	SHF	SYRUP	1	0	1630.7072	4.290062868	3.673079992	21.58147497	17.00145945	35.70328791	23.97762744	19.9246759	25.43231988
am109	SMF	ROCKET	0	0	3091.4144	-1.118917994	-1.106509219	-26.98892699	-48.82006706	-24.04126803	-17.65320736	24.23919408	-1.756164383
am109	MP	ANCHOR	0	0	3487.2161	1.770757993	0.093199909	-3.247866547	-5.589708858	-16.04377236	-12.43780193	4.356975868	16.59454098
am109	MP	MAGNET	0	0	3183.9857	-2.579959267	2.541800686	7.823970413	-0.153269517	8.152749691	23.9268435	11.80653966	24.38055998
am109	IF	LAMP	0	0	4438.4514	-4.598290016	0.847404218	-5.402188645	-4.052231474	28.82078868	-24.9692407	-24.07151632	-14.00793874
am109	SMP	STRING	0	0	2012.6399	2.75794671	2.248099546	0.973076993	-15.00154575	-8.057304491	17.79824265	16.79660011	45.49729333
am109	SHF	HONEY	1	0	1673.8577	3.7737892	3.246949509	-6.549833055	-12.53044221	-9.058582247	-13.4493592	19.23265641	-2.037391041
am109	MF	KETTLE	0	0	2357.6119	1.353812058	1.107941726	5.566783197	21.78501894	12.40352726	-66.94850516	-4.557399543	-9.00652253
am109	MF	BELL	0	0	2429.9612	1.195944549	2.51055608	21.13086115	30.16110495	6.299217347	28.93655785	13.46501952	3.692082138
am109	SHP	DRUM	1	1	3250.8815	3.110574808	1.107590501	6.001314612	-7.050534246	32.88692592	19.6526808	21.16996235	6.479249649
am109	SHF	PYTHON	1	0	1400.9	5.013523809	3.14663584	-14.51776247	-21.96758821	19.26497131	-32.96135362	-9.559723931	-12.63532973
am109	SMP	MOUSE	0	0	2337.0768	-2.347047834	0.406425961	-3.750858393	-3.227830272	-14.87537388	-6.438044591	-3.657162502	6.763402884
am109	SHF	CORN	1	0	2264.8465	-3.797564563	-0.198983858	24.43279546	40.76196751	16.04154487	30.30118769	-16.33796811	6.140472756
am109	IP	BRAIN	0	0	2729.9725	-0.378296186	1.818518825	-11.12680042	-26.31700894	-24.17966079	26.26599633	-1.194333429	27.43782978
am109	MF	SPONGE	0	0	2664.6774	0.55169542	0.943576426	-1.727084184	-12.6780511	-16.9083779	33.63041906	1.870031517	30.07451715
am109	MP	MAP	0	0	2200.6129	2.78835314	-0.001079064	14.12817084	23.1509919	-13.05996587	15.00439572	20.19244412	-0.268114638
am109	SHP	QUILT	1	0	2164.2213	-2.289000061	2.933346199	3.930112031	9.336478497	-0.059277069	14.02229679	-17.5285651	1.834909368
am109	MF	PENNY	0	1	2244.9686	2.625613888	3.011355877	30.37970475	52.00289257	7.706937882	12.86380999	9.366422105	0.866862522
am109	SMP	ARROW	0	1	2417.869	1.711412194	1.947983001	-9.171818679	-19.99947778	-0.514035358	16.58975208	2.305242714	-3.136371955
am109	SHF	APPLE	1	1	1198.6466	5.691294361	2.496005939	4.27101765	-1.953827472	-8.123401961	10.42963784	18.93720821	22.2972161
am109	SHF	POTATO	1	0	1734.2974	-3.135304117	-1.248731837	-15.16118787	-33.08231889	-23.48845664	22.89038756	7.482767929	16.41353086
am109	SHF	SWORD	1	0	1481.2982	-0.746583303	-1.808472655	-8.191161378	-11.10248626	-7.855904192	-5.737783742	-10.16605717	3.10153696
am109	SMP	GLASSES	0	0	3273.1257	3.552013622	2.75667395	-46.65443007	-73.41378891	-79.94191965	33.53759747	0.062642096	-5.979132665
am109	SHP	PIGEON	1	0	2900.0278	-0.93241406	0.460037942	-18.56869061	-31.4429589	-15.06717232	0.573208313	4.223018699	-6.568054295
am110	IF	CANOE	0	0	2719.8121	3.703839612	4.099156748	-3.097712886	1.641105535	-13.0942354	-10.46360637	8.402677819	-22.80058966
am110	SHF	RAILROAD	1	1	2134.9365	4.268044208	-3.432167745	10.30763192	6.306016826	16.88487376	23.01715809	9.511795836	9.978203774
am110	MP	POTATO	0	0	2150.7535	-0.707794002	3.16052423	-0.325445987	-8.529637206	8.728432755	28.68448744	4.01258018	-7.046969313
am110	SHP	MUFFIN	1	1	1831.3916	5.252714952	0.746494087	6.978432059	13.7330578	11.43830158	-3.735372219	3.982711979	-15.30828901
am110	IF	TRACTOR	0	0	2103.2634	-0.329082724	2.265185787	-0.701449597	-2.971104661	7.799656035	-1.261722516	-10.19200657	13.67330166
am110	MP	SOAP	0	0	2475.8848	-2.02913989	-0.374500069	-8.028979889	-12.81782377	-2.56446805	-25.03392558	-5.886119848	18.4636687
am110	IP	BELL	0	1	2019.042	3.873987968	2.020625754	12.25137441	6.203760139	35.46943095	8.620432718	5.878425597	22.84243072
am110	MF	MILK	0	0	1338.4314	-1.363197274	0.344217312	-5.284460046	-5.305724129	-1.151550769	-14.00653458	-2.538512847	-6.957182856
am110	MP	JACKET	0	0	1394.3341	0.352054217	-1.647089862	8.87525625	12.43874475	5.09407604	18.32028952	16.09569424	-21.82081516
am110	IP	ARROW	0	1	2894.1938	4.79432045	-1.878890683	-12.91724358	-25.24798682	-9.869293254	-10.65217293	5.520024965	8.931641381
am110	SMP	CARROT	0	0	2292.3838	-2.354004912	-2.272443475	-1.848211976	-10.04936372	8.48356989	20.26331396	-2.033862707	2.792535525
am110	IF	BRAIN	0	0	2364.8585	2.739954259	-1.34734979	-8.442877699	-13.48286746	-3.726452659	9.529454134	-11.22679601	-3.302513735
am110	MF	PIANO	0	0	2213.0284	2.041313555	-2.124627253	0.148215363	5.958677799	-14.77062986	15.53901461	-7.210396344	-9.45986907
am110	IF	SHEEP	0	0	2655.0191	1.677513027	2.441345056	4.063294783	-1.274390691	24.07365974	-9.123453583	11.46725877	2.977141132
am110	IF	PARADE	0	1	2309.0538	-1.155344588	1.08122616	9.819823621	9.432106305	10.68289488	11.86666113	8.513431713	10.65305526
am110	SHF	OTTER	1	1	1707.6195	0.526945806	1.170751155	-5.761822206	-4.517813739	-6.192223455	-12.16439473	-7.24644709	-2.914572057
am110	MF	MUSTARD	0	0	2469.8074	0.309661787	-1.064038969	-12.29725637	-19.7127378	9.411875898	-1.932682441	-17.41084738	-7.884360386
am110	SHP	HONEY	1	1	2305.3262	6.347578709	2.43024877	12.41242503	10.26473577	22.12703745	-10.19311541	25.10123131	10.33726449
am110	IF	DOLL	0	0	2760.5751	0.570725471	0.319768211	-4.864306002	-4.403470015	-4.68767625	7.634216648	-2.179621813	-22.34656432
am110	IF	CORN	0	0	3267.4016	-1.996631029	-4.091116825	14.21946622	13.8503322	5.984928895	-6.789602003	30.72361732	19.85984467
am110	MP	DIAMOND	0	0	1602.0876	-2.533417789	-0.643900212	1.675466904	2.94797209	-6.85229021	3.359453669	-7.935965903	20.02462119
am110	SMP	WOLF	0	0	2477.2675	-1.518470071	-1.055957984	0.937769604	1.589854056	-10.44134736	17.48158853	-8.332581392	12.07777487
am110	SHF	BANANA	1	1	1936.7642	3.501490464	1.163507874	-5.054806456	-1.931098113	-14.04249467	-9.510720817	-2.834264923	-7.137045964
am110	IF	SHOWER	0	0	2767.6293	1.245286271	0.274921771	1.068581658	-0.422951532	6.983739632	-7.994839787	-10.23266326	25.52529957
am110	IF	MAP	0	0	2084.6605	-7.506680568	-0.278848892	-8.577954184	-25.05340642	5.259330144	4.663465685	5.369950714	15.36226853
am110	MP	BOOT	0	0	1652.068	-1.885944098	0.158002154	7.751553631	10.25359741	24.39731669	-9.484020011	2.294006916	-1.346662494
am110	SHP	UMBRELLA	1	1	3824.1618	5.416870567	2.652675935	-5.968744458	-21.07354634	0.778984466	8.673108047	5.053773763	24.07457862
am110	IF	DESK	0	1	2392.2999	-0.504130924	0.233508885	14.48911106	18.15945152	16.05972944	8.281553926	8.487051475	10.49248838
am110	MP	WINE	0	0	2524.3052	0.452176882	-1.791612013	-13.86090028	-18.04335845	-21.65588346	-10.01970662	-6.306670742	0.165916139
am110	IP	LOCKER	0	0	2427.7904	0.49239344	1.158652062	1.097574994	-6.08346674	16.84686683	20.54143681	-3.67879977	3.536084494
am110	SHF	MOUSE	1	1	2325.3539	2.544375482	-0.647789175	30.79800523	28.10748405	31.0131121	43.44974755	42.34851674	13.88447248
am110	SHP	CAMERA	1	1	3137.414	4.412914003	-0.544175336	-5.11213128	-8.854700326	11.11956704	15.13383578	-38.85055783	24.62308878
am110	IF	FLAG	0	0	2413.0599	1.099012073	-2.700002532	5.0789192	2.346679217	2.507127005	-5.109250796	17.65181069	10.5923624
am110	IP	LAMP	0	0	2417.8458	-5.768947447	-0.157937728	-2.834933345	4.632301255	-1.196633561	9.452277668	-29.13665543	-9.520000344
am110	IF	PAN	0	0	2053.0113	-1.411563121	-2.533048877	-14.30324541	-13.73110714	-15.91483049	-11.57586238	-13.4728024	-18.51369487
am110	MP	OVEN	0	0	3266.6646	1.516654464	1.260522237	-8.232462449	-14.79701472	-1.641136284	17.09196794	5.406005495	-30.16625072
am110	IF	MAGNET	0	0	2257.0569	-1.527953382	2.376765943	-6.284019886	-20.49831241	3.756049598	20.78619351	-4.943879271	19.27617253
am110	IP	CAGE	0	0	3273.5071	-2.128016988	0.161602246	7.266080332	21.2187931	-0.212011631	10.71527462	-15.17201356	-15.20781045
am110	MP	GLASSES	0	0	2145.9549	-1.553848733	-0.1104422	-4.166391171	-14.55611756	14.90893101	22.57936863	-7.221322653	-0.53798273
am110	SHF	PENNY	1	1	2048.4677	0.216064318	2.183220247	8.320317454	9.448466826	33.73239794	-2.665284798	4.664574123	-14.07564988
am110	SHF	LIME	1	1	3009.7959	4.179545151	2.551492189	2.690388971	12.29707169	-11.40539708	3.782194118	10.35771343	-35.46527337
am110	IP	SEAL	0	1	2474.4423	4.500837009	-0.957886445	6.638011065	1.034930961	0.304837067	18.75938119	14.98360783	16.69148073
am110	IP	SCISSORS	0	1	2307.9088	-1.569076522	2.138070348	20.95612047	14.02063923	43.50047957	39.05369438	17.348407	12.97480485
am110	MF	SHOVEL	0	0	1880.0134	-0.872348435	1.658556211	-15.80133221	-18.38185458	-22.17129036	-17.36112056	-21.91494757	14.78371957
am110	IP	PILLOW	0	0	1791.85	-2.416823745	1.174971305	3.496206166	5.494135814	-1.776064019	11.44217679	7.503678157	-11.95612826
am110	SHP	FLASK	1	1	4299.331	0.718701013	2.188043069	-0.541551096	5.884446682	0.155642444	-8.282446269	-14.78707413	-1.969969011
am110	SMP	PURSE	0	0	4234.9401	-1.19412522	-0.085115533	-17.24966171	-24.25784555	-7.740989857	-27.31239668	-17.5007427	11.62742058
am110	IF	COFFEE	0	1	3122.7655	-2.211231403	2.686940689	-6.830248007	-12.99058982	6.442662267	-7.322806147	-5.679520738	2.760480257
am110	MF	CEREAL	0	0	3172.4591	0.956695028	0.13655156	-20.06832676	-5.361959746	-40.44933665	-22.56064079	-27.54190761	-46.99769885
am110	IP	CRAB	0	1	2550.6621	3.502878505	-1.3544043	-5.293384224	-10.76988617	-2.734218412	0.685288264	-1.437867787	5.076638687
am110	IF	BASKET	0	0	2388.7879	-1.432746071	0.410757715	-3.136653175	0.599594842	-6.729753332	-17.05410227	-3.997991315	-1.831300293
am110	SMP	LADDER	0	1	3382.9089	2.833371562	1.175259728	17.82415159	26.26582626	11.39641796	11.420829	7.045721074	9.915571583
am110	IP	RABBIT	0	0	2835.975	1.992814555	-1.984370811	1.072517802	1.604717666	12.56876932	11.91106826	-8.018049149	-11.80271454
am110	IP	HAMMER	0	1	1600.332	0.138867477	1.195358183	-18.70663126	-23.69126848	-16.44973888	-7.492596086	-9.834552244	-22.47401515
am110	IF	KETTLE	0	0	2553.0544	-2.041695568	-1.573522251	0.539309828	-8.5320138	21.08528788	1.663721163	15.41575377	-8.384954151
am110	MP	MOTH	0	0	2407.6594	-0.637035586	1.570154484	6.23448005	-1.427085838	16.31884958	8.570146841	23.87824615	-0.963187974
am110	IP	TIRE	0	0	3071.4485	1.10842293	0.241433784	-12.98081037	-13.93493759	-16.44524586	-16.49783487	-12.243883	-2.222290546
am110	SHF	STAPLER	1	0	2400.2503	3.836171041	-1.474869145	14.34476777	19.14198224	11.03885291	-3.267879397	16.32648022	9.40257605
am110	MP	GUITAR	0	0	3206.3791	0.675547784	1.452235647	2.269439461	8.209159986	-14.89480736	8.415975146	-6.491844307	5.282096615
am110	IF	KNIFE	0	1	3225.1619	-0.885190367	1.930150306	1.640625939	0.793350407	-10.28441761	26.78036804	-5.673888412	9.681708142
am110	SHF	DUCK	1	1	1691.1328	3.492780481	1.561481944	0.85269245	8.387743585	25.83440791	-38.15253503	-13.74455382	-8.526642888
am110	MF	PHONE	0	0	2721.1046	4.80142837	2.303978545	4.720825712	1.682006861	5.76862945	10.91447448	18.07980085	-8.72368509
am110	IP	SOCK	0	0	2906.4895	0.146649668	-0.148429345	4.462545345	8.481774272	6.9397808	18.02526161	-4.479237087	-15.29711984
am110	SHF	LION	1	1	3276.0029	-2.541288414	-0.195166235	-2.96127697	-3.177899146	-0.06445177	-5.446855712	2.690247534	-12.12135963
am110	MP	MONKEY	0	0	2326.0176	-0.872647477	1.121161128	3.31159577	1.046230033	-11.72435404	10.04720497	22.60862701	-2.559168346
am110	SHF	TRAY	1	0	2814.0513	0.519777572	0.896120249	-1.266337449	-19.87339833	-0.288363631	19.58816637	26.40342704	21.13991615
am110	SHF	PENCIL	1	1	2102.8592	4.451935177	0.675578396	9.619740175	18.05248805	5.899917905	4.861604869	-2.677301547	-0.859420577
am110	SHF	PYTHON	1	1	2901.2943	1.227971445	-1.938033719	1.1078307	6.151394326	2.853529597	-0.919797409	-6.89696799	-9.983693038
am110	SHF	NAPKIN	1	1	1847.7413	-1.189899675	-1.835778389	14.70854229	21.46058482	10.61615212	9.719612369	11.86055344	-1.893580422
am110	MF	CHEESE	0	0	2183.8041	-1.668988051	0.863295265	9.27388746	21.26983263	19.80680107	5.51046057	-15.26658282	-17.82893194
am110	IP	KITTEN	0	0	2199.7336	1.206119394	2.525690859	-9.990561684	-0.455033999	-27.18851265	-3.609275136	-11.71732337	-34.18693256
am110	IP	TOILET	0	0	3303.8158	-0.610799136	-1.673562472	-1.903659751	-2.431159892	-16.95127786	-5.390880008	0.980543967	18.47047561
am110	MP	BONE	0	0	3375.6478	0.121665843	3.098627407	-11.2400765	-18.35089737	-12.42127553	2.386128629	-9.304150478	7.496137531
am110	MF	OMELET	0	0	1511.5844	1.495807839	2.154243502	2.332494578	1.03388622	27.03630465	-11.68781452	-9.440762827	6.928987768
am110	IF	DEER	0	1	2492.487	-2.424577008	-0.854127565	6.504373476	0.118954377	-4.016446507	23.09788362	16.97316537	18.27407687
am110	IP	CLOCK	0	0	3602.4861	0.4177857	-0.06550762	-6.016980707	-8.154583	-1.096246241	6.657504844	-13.62474106	-2.243208819
am110	IP	HOOK	0	1	2355.2834	1.629646024	-1.948925161	2.614130054	2.148776921	-6.502879925	3.744121913	-8.793640309	32.83208772
am110	IF	FENCE	0	0	2102.6364	-1.251162613	-1.54264216	12.00094188	10.30784659	30.18615359	15.19060098	11.17633642	-5.208953755
am110	SHF	HAM	1	0	2852.7499	3.253808906	1.295089436	8.15994936	7.482861888	15.59868741	-12.15902341	10.45531858	16.17833839
am110	SMP	WHIP	0	1	2878.4523	1.739207004	-2.39887671	3.810843439	-6.415122333	19.72992205	7.827489397	15.85539373	7.818305059
am110	MP	DOLLAR	0	0	3010.9016	2.256494603	0.729608205	-4.839564631	-6.908067494	-12.32503165	13.08829581	-1.14014066	-7.383590936
am110	IP	OYSTER	0	0	2441.8097	2.839090011	1.011918714	-11.94567042	-6.37336476	-11.86653037	0.106592323	-21.56012112	-33.30763557
am110	SHF	NEEDLE	1	1	2677.2127	6.867947607	3.848528692	4.603297113	2.580509554	-2.009709992	7.578845248	6.601690934	16.57030975
am110	IF	BADGE	0	0	3094.7971	5.258310348	2.911625092	-1.690980978	-9.658007426	21.18328901	-7.714685154	-6.459554616	17.71360501
am110	IP	CROWN	0	0	2912.9134	0.936712625	1.595638061	-13.78482425	-27.43620638	-10.63473761	11.00025628	4.987306863	-6.531306213
am110	IP	ROCKET	0	0	2769.4695	-0.23657285	-0.204148636	1.648365983	-4.523468154	12.1061389	13.05760718	6.560954373	-1.380840348
am110	IF	CIGAR	0	0	2969.5604	0.219442224	-0.694104609	-1.78019564	-4.712723802	1.290886696	-24.01093728	12.90274168	4.846968191
am110	IP	PIE	0	0	2597.0538	-1.699085289	3.181848921	-9.601245371	-16.28987772	-8.281462606	0.134442749	5.246970027	-12.25512925
am110	IF	PAIL	0	0	2638.9741	1.374405206	0.176097773	-5.486173669	-0.536768607	-26.06490017	-0.223138003	-2.068549702	-11.41562012
am110	MF	TOWEL	0	0	3886.9245	-2.072345441	-1.098068752	-18.72113535	-31.53527346	-16.58881127	-14.32344172	3.565291758	-1.271137524
am110	SHF	SYRUP	1	1	1085.7733	-1.768576914	-0.232005642	16.43430349	24.30008528	7.793624609	-11.8567474	28.56383844	-1.617493569
am110	SHF	CAPE	1	1	1697.203	3.602656214	1.914009233	4.47224987	-1.106899822	8.145108684	-15.34387091	10.67102846	33.14315772
am110	IP	FAN	0	0	2925.554	0.312846564	-0.252982427	0.906238048	2.599130965	12.49635988	1.59567786	-3.747646774	-15.13892924
am110	IP	CANNON	0	1	3557.3533	2.215054039	-1.290387672	-0.528413811	-1.365289297	22.58280749	-7.431114888	-17.85537213	6.19314228
am110	IP	ROSE	0	0	1932.1375	-0.988455969	0.213172518	-2.341115278	-9.132633359	6.84493293	16.93516887	6.015528862	-13.15387976
am110	IF	ROPE	0	1	2836.8634	0.550170113	-0.838936316	-2.796041482	-9.330274346	2.767319562	-7.724322076	19.98660732	-10.72092351
am110	IP	PAINTBRUSH	0	0	3684.7342	3.714793873	0.974353486	3.55575775	7.225284952	7.092142848	12.90266137	-16.29814016	4.416268501
am110	IF	BROOM	0	1	4003.1921	-1.135315622	0.685869673	1.776763941	6.743894242	6.62437281	-14.94725345	-1.933459624	-6.489212845
am110	MF	CAKE	0	0	2758.9397	0.7620616	-0.158832213	-1.595042826	-0.201640121	-1.005391061	-17.58382056	22.10854191	-30.70009193
am110	IP	TIGER	0	0	3334.9407	0.242369788	-1.988810663	-9.725859007	-15.94808737	10.86452642	-9.241437855	-13.76835696	-2.175281655
am110	MP	HIGHWAY	0	0	3256.3426	4.715510539	1.864108928	3.835095816	2.111358481	13.96582295	13.51976382	-8.356799834	8.696893231
am110	IP	VIOLIN	0	0	2530.2299	2.717009594	-3.094203849	-15.07682187	-17.91852543	-24.3205605	11.69171581	-13.96863677	-15.73229811
am110	SHF	PIGEON	1	0	1894.2669	1.417145857	-2.945406056	13.56990261	2.939100151	37.69392746	7.954856218	18.26644438	28.63782252
am110	SHF	SPONGE	1	1	1078.3528	6.561122883	-0.479780524	3.845688054	0.46912647	-5.272942507	-0.850589925	14.33838307	18.98948009
am110	IP	CANDLE	0	0	2904.0463	0.692075474	-3.814221032	-5.464767342	-1.115149556	-8.198180432	-10.33425098	-5.209588428	-17.75969289
am110	IF	BOWL	0	0	2891.4092	3.391428264	-1.447961569	8.316715703	3.165398818	34.46382116	6.259726965	18.55699992	-15.67013649
am110	MF	CHERRY	0	1	3209.5231	0.973082164	1.449200156	-10.83590612	-24.6075817	3.219260579	3.657638568	0.122742344	4.020020722
am110	SHF	CASTLE	1	1	3078.0329	-1.38538291	0.704851326	13.69540863	19.52006803	21.38257644	12.75330029	11.95241457	-19.07870202
am110	IP	SWORD	0	0	3059.096	3.284859685	0.321963299	2.757802705	-3.38852106	9.822318137	5.963607977	-7.051371612	33.70466664
am110	IF	MUG	0	0	3026.5115	3.393681801	-2.318513987	2.210068588	1.372807629	-10.84302947	17.68587846	1.318008269	10.40450829
am110	IP	WALLET	0	1	3696.0078	-2.153569323	0.573229613	-3.190251654	-4.57677406	11.11766467	-12.04818009	0.488812905	-13.02558635
am110	IF	SPOON	0	0	3228.8845	-1.95241841	3.559833805	-12.15489504	-12.56975426	-2.853139455	-33.04152717	-21.00232131	9.799807388
am110	SHP	BACON	1	1	2940.6389	6.3705115	4.603884846	8.490302302	10.84193633	13.83939675	4.131442569	-0.725508683	8.896954553
am110	MP	BIBLE	0	0	2947.8643	-2.788522065	1.377866031	7.549699693	11.68129797	-0.871171997	26.98078117	-7.734468536	5.743327637
am113	SHP	CANOE	1	0	2712.002	2.871823044	3.292730305	8.037031268	16.56735907	-7.394531522	-18.85455191	14.6419991	-3.119964272
am113	SHF	QUILT	1	0	1901.9375	0.749701678	0.465665311	-12.92557505	-6.031896637	-19.82349316	-7.615425146	-13.03370567	-35.67975985
am113	SHF	APPLE	1	0	2482.1503	-2.07199078	-0.278063301	-4.188800565	-11.37706426	-0.837444654	-4.48325283	-8.115333049	26.82543394
am113	SHF	HONEY	1	0	1562.3246	4.131535229	0.105243659	0.851673064	4.828986977	9.435730868	-23.40332282	-2.053866725	-4.447643758
am113	SHP	NEEDLE	1	0	1631.3874	2.065945336	0.541196271	9.060707764	-8.518249013	32.99814597	3.256580803	32.52169734	18.86013015
am113	SHF	CAKE	1	0	2614.0914	3.799734455	2.185233079	-6.188392503	-6.53086056	-18.56622615	-20.10509222	17.08174954	-20.16618868
am113	MF	CRADLE	0	0	2510.1084	-0.406438897	3.480061386	-4.516312095	-9.626894587	40.36033626	-30.95391287	-3.198465265	-18.0622817
am113	SMP	BENCH	0	0	2592.2512	3.047520639	1.149761255	11.95464641	5.76688756	7.629014058	-0.200094419	37.28767678	7.992248813
am113	SHP	LADDER	1	0	1990.1754	5.640396796	3.881629596	9.925688504	23.75402239	-3.727537777	-8.398283622	2.490066309	-6.813401915
am113	SHF	LIZARD	1	1	1738.0595	3.462190602	-0.057689749	1.424949961	-7.405094645	19.1711478	4.030201144	9.241073989	3.214512581
am113	SHF	ROSE	1	1	1863.4445	7.028906602	1.29452367	19.22221567	32.53909393	24.4510375	11.73664489	4.004212489	-9.785510278
am113	SHP	SOUP	1	1	1786.5828	0.362429164	2.219331855	8.021736691	16.99731615	1.964442154	-0.018160042	-1.373996952	-0.914104929
am113	IF	FENCE	0	0	2889.9878	-1.505954163	1.42345088	3.341743159	-4.528108507	16.53675601	13.97394122	12.43682977	-0.722733627
am113	MP	TIRE	0	1	2837.187	2.54433879	-0.129040282	-3.918639549	-8.609615386	13.66762734	-19.64298724	-0.612434066	0.144500193
am113	SHF	DOLLAR	1	1	1718.3907	2.852787084	-0.985511148	-18.28238885	-26.10635405	-9.408453677	-24.33837977	-13.18177668	-1.445042184
am113	MF	SCISSORS	0	0	2118.7123	-0.224400397	0.323049306	-2.342855543	5.013627612	-14.34309457	-9.906451579	-10.4211814	-1.015908075
am113	SHP	MONKEY	1	0	2290.4787	0.041031195	0.690669754	-1.225806809	-6.108131978	8.014217659	-7.201211611	-2.93689932	14.45762381
am113	SHF	STAPLER	1	0	2947.2411	-1.77986719	0.177413877	2.083087131	-3.206517266	10.01318179	-9.216669342	-3.356891812	29.90907492
am113	SHP	NEST	1	1	1261.2239	-1.107666023	-1.86430875	15.22477484	24.18669725	9.148688532	-2.078172188	15.52562473	-3.379541147
am113	SHF	UMBRELLA	1	1	1766.5848	1.714513238	0.916367353	29.76014523	41.837934	41.00293538	-13.69615544	18.54876527	14.78119909
am113	MP	BASKET	0	0	3335.9658	0.757172546	0.411300764	20.52911299	20.86713923	6.516380207	38.11206582	25.7749467	15.02981646
am113	SMP	BUTTER	0	0	2938.8186	3.614505063	-0.748641643	14.93421347	10.53482685	18.30114583	14.52733817	17.12234438	25.37484685
am113	SHF	BADGE	1	1	2472.7508	-0.847502397	-1.549679268	22.31071998	19.21268735	31.12857438	-1.243774935	28.74464321	29.23638774
am113	SMF	CASTLE	0	0	3034.1847	0.353430478	-2.860595257	9.751340241	7.464960498	7.772425426	19.71279697	8.237663688	17.14035222
am113	SHP	SWORD	1	0	2165.7011	1.231133978	-0.342449146	16.2926159	20.7483559	25.01828359	-6.777978394	13.09800352	8.706312626
am113	MP	PURSE	0	0	2834.427	-1.079583857	-1.741538644	-7.192660058	-23.78625081	-10.61456106	28.29004419	3.398158499	23.02528781
am113	SHF	BRAIN	1	0	2062.0333	5.756371671	-0.134668704	-6.133403456	-6.98411188	8.926659747	-18.97089132	-1.261077894	-18.67832074
am113	SHP	MOUSE	1	1	1483.1515	2.040405234	2.972240622	13.0924744	32.66121433	9.484430571	-17.9847917	-0.465766322	-19.30250286
am113	SHF	FAN	1	0	3193.6166	1.119449508	-0.504359261	-0.86740361	-4.833846235	4.767660921	1.778471692	-2.519795455	9.706365474
am113	SHF	MAGNET	1	1	2444.9444	1.73966212	0.784428315	6.561827798	17.75924001	22.42570368	-25.52367597	-8.325675916	-10.9604968
am113	SHP	SOCK	1	0	3223.2142	-2.161307311	-1.270569861	10.17955064	9.41539706	-1.446383179	37.29908371	4.28780139	18.3288559
am113	SHP	MUG	1	1	1598.9832	3.839141917	-0.208618778	9.779789394	1.495161966	43.4829107	22.04427788	9.315544809	-0.230114182
am113	SHP	SPONGE	1	1	3093.0197	6.747065244	-0.758380307	-5.069047539	-10.46161801	7.797292969	18.29953935	-12.1621912	-0.563987536
am113	SHF	NET	1	0	2150.061	3.374586686	1.135083511	2.333371907	-1.287736015	21.84764974	12.26033807	-5.065471867	1.522513486
am113	MP	KETTLE	0	0	2581.2589	-2.868648628	-1.323716442	-4.940384977	-7.452957159	-0.843963572	11.10078437	-4.178851657	-10.41830647
am113	SHF	MOON	1	0	1889.9033	1.603918093	1.036725434	-6.936741442	-14.2013387	3.06837754	-12.10617582	-1.379446463	5.245727282
am113	SHF	DRUM	1	0	3327.271	-1.769456183	1.508472215	-0.207772219	1.911203635	-0.25069562	-32.80839092	1.528326285	8.637333864
am113	SHP	MANURE	1	0	1707.7105	1.468993742	2.456107707	1.21746705	9.472821347	3.335422597	2.762123756	-7.176591603	-20.99036858
am113	MF	CLOCK	0	0	3594.103	1.026914566	2.133871555	8.569679771	6.490474462	64.99255334	-25.63482059	-7.031497074	2.479857489
am113	SHP	HAM	1	1	2243.4426	0.828259798	2.470870153	11.26295526	21.57273322	-1.752284047	13.73837986	-1.730974775	3.781483608
am113	SHF	MUFFIN	1	0	2524.0489	3.778307424	-0.166447567	0.666622198	-2.163009093	6.548807845	-9.167572687	4.762854691	5.005828633
am113	MF	NAPKIN	0	1	3100.7878	0.892938327	3.010142379	-8.302234693	-16.69904754	18.57841727	-16.99278627	-7.754502468	0.516793487
am113	SHP	ARROW	1	0	2156.8689	-0.352120175	1.301318436	10.38324717	7.993224217	22.19937124	-6.782665774	6.533332523	23.78098706
am113	SHF	BELL	1	1	1478.9878	5.225751972	2.683047513	-10.04593348	-13.4018413	-14.63300217	-15.76554851	-3.857918928	1.629422952
am113	SHP	GOAT	1	0	1893.8912	8.096834749	1.159685131	8.117682793	3.44635925	7.602158097	0.385744667	33.37027496	-8.390297748
am113	SHP	MOTH	1	1	1650.572	4.66189128	2.605841829	19.50479682	27.26753584	-3.298474833	13.00147954	24.91960919	8.641019081
am113	IF	LOCKER	0	0	2651.7588	1.217725242	1.371896105	-1.474256052	-2.434864715	10.033153	14.47250029	-17.19132513	5.31180974
am113	SHP	CAGE	1	1	2961.6957	0.445741515	-0.969551661	15.85445772	32.92630315	22.09619112	-18.30540185	-5.810280453	-2.463643773
am113	SHP	DOLL	1	0	2931.5399	-0.853908268	-1.466908879	-6.914325673	-3.070751376	-7.504631974	-7.19120264	-7.188200244	-20.74180275
am113	MF	PYTHON	0	0	3109.0739	4.629590081	1.774366853	3.038764463	7.282639913	-11.46869994	-5.153848643	15.60843357	-13.15751485
am113	SHP	BROOM	1	0	2556.3384	2.064652566	1.147349659	13.03795445	12.8350574	3.522172035	0.752316116	24.89573331	12.59118787
am113	SHP	STOOL	1	1	2246.4066	2.353186305	2.695703083	15.00950436	11.79469327	50.49098001	3.775080087	16.67521282	-5.81341002
am113	SHP	KEG	1	1	1904.0057	-0.010853242	-0.789317752	41.30107933	51.81523888	33.76526769	17.66543828	34.25428658	33.67726365
am113	SHF	CEREAL	1	1	1278.9639	2.068553868	1.271150875	13.89319084	7.676520708	30.80897013	15.54391967	10.42448311	24.81009729
am113	SHP	FLASK	1	1	3160.5927	-1.269671857	-2.064256848	2.215342918	2.863687366	-0.01395076	8.799212862	-0.071248846	1.656849294
am113	IF	CHEESE	0	1	3097.5739	0.384441108	-0.148759711	-16.14932965	-29.3751049	-13.6802867	18.71359037	10.69544331	-30.77827524
am113	SHF	MUSTARD	1	1	1812.1385	2.931615439	0.490369377	5.035106353	12.64933311	-1.576031827	17.05100245	-6.140416458	-7.3716149
am113	SHP	PILLOW	1	1	1458.0209	3.533498476	0.586693513	8.971185066	12.83382204	-2.835086937	-22.94703746	10.18414104	23.87113096
am113	SHF	PAINTBRUSH	1	1	1755.15	0.759062325	0.434288038	7.182298022	19.93563393	11.82675405	1.069002998	-11.20549045	-14.80534137
am113	SMF	STRING	0	0	4189.0177	-4.022628487	-0.438160148	-10.65609826	-14.16015739	-11.2682049	-0.348758798	-9.353947815	-4.623965883
am113	SMP	PAN	0	0	3295.043	-3.901652525	-1.003707576	9.792162458	14.35132973	13.97764951	3.503544405	10.62764867	-10.00023867
am113	SMP	WALLET	0	1	3238.5924	0.940693942	0.525589609	-0.494386445	-5.165234306	2.629706117	-6.711889339	-1.631325465	20.08100116
am113	SHP	BACON	1	1	1706.2749	6.427383273	3.174037853	-3.114219059	-6.115095296	-14.86753138	-4.076848896	16.34916053	-9.19035831
am113	SHF	SYRUP	1	1	1382.1506	0.587254373	-0.846152888	17.42756992	19.4405677	1.385078242	34.06620572	22.0143366	9.139466261
am113	SHF	GLASSES	1	1	2100.7771	3.47422687	2.012007902	19.63173768	23.90330596	14.00892574	13.83974088	17.10425931	16.39699393
am113	SHP	LION	1	0	2563.2306	3.019244882	2.629457728	5.932988845	15.26565531	-4.270984997	10.99247698	-9.77294634	2.027536715
am113	SHF	TOILET	1	0	1196.2131	2.581667631	0.116727648	-3.566596577	-1.710678138	6.912479763	-6.567501407	-7.55978993	-13.78348516
am113	SHP	COUCH	1	1	3238.7923	1.422727735	2.734694713	-12.75386258	-28.97628171	6.685413758	-4.564408317	9.562884934	-10.20677324
am113	SHP	WOLF	1	0	2168.2682	-1.640011048	0.636695285	7.71041683	2.425548552	9.594558385	18.40819293	19.47959266	1.228736007
am113	IF	LAMP	0	0	3114.701	-3.472155845	-0.44006484	-0.122486927	-4.725777827	7.050645273	-5.498203932	-10.99904454	30.83457813
am113	SHP	DEER	1	0	2535.4439	2.793695775	0.988007963	-3.563779559	-18.05056722	-12.71815451	37.08908679	16.68565393	6.006676065
am113	SHP	SHEEP	1	1	2629.0613	-0.593946223	-1.03742646	-5.630248627	8.235332347	-31.40938039	-41.70185325	-19.32799431	11.083392
am113	SMP	CROWN	0	0	3368.7845	0.930361336	0.365419329	8.81883232	14.45040279	25.98001281	-17.61181641	-9.567339917	13.83078888
am113	SHF	TOAST	1	0	2710.8585	-1.111281686	-1.86888782	4.88461443	2.584971108	-4.873732568	13.05728325	14.93547977	3.315609439
am113	SHF	HOOK	1	1	2776.1113	5.05185826	0.518208556	19.67911287	19.74637993	36.93295669	-14.07592479	11.57756043	34.53435724
am113	SHP	ROPE	1	1	2392.5585	2.980174764	0.950341144	-0.35480103	-5.031417153	-22.15675483	13.94502043	18.83318801	1.928215969
am113	IP	PAIL	0	0	3261.9429	1.749047707	-1.519013597	-2.932217492	-6.532092219	19.80360286	-37.37054847	-14.09755621	25.75331139
am113	SHF	TURTLE	1	0	1871.7839	0.146153338	-2.061303845	28.5787244	36.77267117	11.39290857	16.31308997	27.08568257	24.53888964
am113	SMP	TIGER	0	0	3337.6553	0.372494567	0.980676542	17.98930475	9.377280065	36.91159499	21.21397103	26.69758715	15.88536775
am113	SHF	STAR	1	1	1071.2703	2.275711065	2.597204231	-4.010709184	-16.82983784	-2.761901181	38.91043269	5.258867746	4.035838757
am113	SHP	PLATE	1	0	2373.2342	7.798105984	3.382613541	7.939325559	12.35650057	9.152434434	-2.383101563	6.953901022	-2.80018841
am113	SHP	COFFEE	1	1	1552.7245	3.000955869	2.877177679	10.4639597	11.34563555	29.94082298	-20.45422099	3.883395989	15.63148408
am113	SHF	ELEPHANT	1	1	1575.2815	3.485996856	3.456007095	-4.856760777	1.99115807	9.398424623	-12.73609338	-22.12763665	-14.59635559
am113	MF	TRUMPET	0	0	3327.4129	-3.841833658	0.192705026	-5.941199646	-7.826076588	-2.750374318	-11.26144554	-4.589661209	-0.844358878
am113	SHF	DIAMOND	1	1	1355.3443	4.8395658	2.814971749	11.21288187	4.704541106	16.25368089	23.5768518	23.49204752	4.353538715
am113	MP	TOWEL	0	0	3173.7401	1.764330403	-0.642690383	2.926771304	-5.750630886	7.290853463	15.72097384	14.98429565	5.371304488
am113	SHF	JELLY	1	1	2807.0423	0.833987164	-0.95386476	16.61009044	4.451902947	32.81918746	25.7222941	23.97424424	29.82067729
am113	SMP	SPOON	0	0	1430.3343	-0.562038117	0.328970349	-18.69643751	-24.04533518	-25.25017078	-9.111111582	-11.34970895	-8.288310077
am113	MF	SHOVEL	0	1	3358.4646	1.274270069	1.832945997	-16.89362298	-33.70089044	11.5940002	-18.17348987	-3.882218199	-1.118477929
am113	SHF	CAMERA	1	0	1543.4286	3.552235767	1.675409272	-9.517068659	-5.121788325	-9.932453655	-13.07115356	-15.0926047	-15.28438286
am113	MF	CHERRY	0	0	3352.0326	-4.632532098	1.243048505	-1.045797136	-13.84244389	21.1978427	-25.75806017	21.10763497	5.4054726
am113	SMP	OMELET	0	0	3370.9542	0.838162205	1.202432106	4.582319151	5.92470297	28.25175369	-1.920215651	-6.614090343	-4.046436622
am113	SHF	BANANA	1	0	3300.6447	2.864961451	1.315473163	-14.13980955	-20.55442045	-14.41177691	-16.50204481	1.827570433	-12.61662489
am113	SHP	PIE	1	1	1845.3856	2.872794846	2.071070445	10.91404774	17.93258839	26.64116751	-1.69695381	-10.99826984	9.190788893
am113	SHP	SHOWER	1	1	3203.5077	3.000393062	0.688364162	-2.952251354	-4.835016632	0.770325133	-8.844499678	2.482072175	-4.556256812
am113	SHF	CORN	1	1	1491.4562	6.554890812	1.57035851	17.09732578	11.05130987	37.37972576	13.79233465	22.35689344	12.94763704
am113	SHP	ORANGE	1	0	3337.8844	3.525739211	1.902946708	-4.657067734	-3.724295977	-7.877338972	-10.64860881	1.912912738	-11.67110453
am113	SHF	WINE	1	1	1125.5479	6.327299111	1.629334916	8.399999749	8.857887125	17.32103513	13.15891766	7.241740525	-3.912067668
am113	SHP	LIME	1	1	2389.9531	1.598827542	1.072107667	24.3812626	13.37882898	46.09601707	27.45026526	32.52616366	29.66941443
am113	SHP	TRACTOR	1	0	2292.8587	2.227614143	1.306647865	6.874328399	8.626234178	15.64905103	-32.09778994	-1.368247641	27.52054139
am113	SHF	OVEN	1	1	1397.742	2.476953162	0.934067005	-14.32715729	-26.88988296	-6.406043504	-5.998605581	-4.291748479	5.494038873
am113	SHP	DUCK	1	0	2489.19	-1.701248351	-0.834396122	20.55418107	19.27994063	30.93233389	12.09792506	3.345723937	46.99403753
am113	SHF	RABBIT	1	1	2777.5649	0.746835467	1.207312138	9.557130549	6.318378511	14.44128608	-9.691203551	14.80088913	20.46995674
am113	SHF	FLAG	1	1	1674.784	4.245755575	3.33374866	17.10680389	23.2787286	22.68645464	-10.80823442	9.467496873	16.13468624
am113	SHF	TAXI	1	1	1305.5245	0.96617	2.269768391	8.098374223	-2.505780455	22.20486025	20.77877214	25.48784718	-0.627497718
am113	SHP	BARREL	1	0	3096.0767	0.755288623	1.339823059	1.668301803	1.423264752	-5.708229365	5.907036145	5.720913333	1.437600174
am113	SHF	DESK	1	1	1364.4473	-0.564939798	1.467347146	11.70102455	15.87337569	18.15955525	-8.216860424	6.732816509	8.522023079
am113	SHF	MILK	1	0	3220.1116	2.61297417	1.688865133	-12.1967539	-29.33643251	2.336438873	-10.2029024	17.3569234	-8.563186244
am113	SHF	PIGEON	1	0	1659.6035	1.083336036	-1.831421364	-1.701401224	-4.431129345	8.063466758	-20.67219622	-0.275317218	7.930723847
am113	SHP	HAMMER	1	0	3296.4838	2.10144124	2.102777399	21.71530562	26.99604825	10.23447517	1.98433139	22.30693965	24.27849596
am113	SHP	ENVELOPE	1	1	2914.3952	3.216588149	1.836611499	29.62156641	31.15615308	62.27065589	7.177800195	32.11913109	-1.296346017
am113	SHF	JACKET	1	0	3319.4912	3.876720813	1.852912243	-4.509331538	-7.767444947	11.34261506	-6.830139635	-10.19112511	1.875604671
am113	IP	BOOT	0	0	2516.9074	4.236662705	1.707547507	-13.65450858	-20.89791438	-9.80021258	-33.01973087	-3.327935597	6.045001092
am113	MP	ANCHOR	0	0	1486.4953	3.977826262	2.525776486	-5.800019009	2.589339976	-13.0702032	-3.676631321	-6.163282792	-31.67299498
am114	MF	MAP	0	0	1493.3551	1.249270793	-0.919348092	-3.809703435	-4.223704546	-9.953638954	-15.29586019	-10.22816765	18.33186476
am114	SHF	CASTLE	1	0	2179.3949	0.195026604	-0.601379708	-0.199563402	-8.844419722	0.155983335	25.18448924	16.20238978	3.167206273
am114	SHP	DOLLAR	1	1	3247.6196	-0.19236152	0.110256948	11.77046248	13.13951115	15.42220933	-10.2189588	14.63528189	13.02512201
am114	SHF	TRUMPET	1	0	2079.4417	2.77908237	5.077400265	-22.07849904	-32.35340633	22.51073252	12.69107976	-15.75163237	-32.0468169
am114	SHF	PLATE	1	0	3307.8633	-0.17593877	-2.460027955	-1.806121017	-6.019835755	-27.3492102	20.54856062	6.197415944	10.16343971
am114	SHP	LOCKER	1	1	2309.8875	5.233062737	3.520058027	15.34400164	21.37290265	-38.68675669	7.305790439	29.8587529	6.717272593
am114	IP	SPONGE	0	0	3250.6586	3.365123859	-1.287786445	-1.938687935	7.473632147	5.178837139	-13.82059626	-22.47620628	-17.05031864
am114	SHF	BIBLE	1	1	1306.6665	1.989274925	0.661314377	-2.81268988	-1.950667129	7.686982585	13.96369393	-8.086206823	-17.56851694
am114	SHF	TAXI	1	1	2787.3639	4.67538607	1.583431042	-6.32130824	-18.40986474	10.85099758	35.6536414	4.950477979	-0.888045445
am114	SHP	CORN	1	0	3835.5604	2.097626448	-0.07835095	-1.414404763	0.001750873	2.432931619	-7.775003802	-4.430656883	-2.647058639
am114	SMP	CANDLE	0	1	2594.4433	-2.043866637	-1.182526302	1.067935722	6.412774655	-9.780330567	15.84831687	-11.20901794	-10.86438525
am114	SHF	CANNON	1	0	1408.6097	1.39644549	1.149014341	12.49280162	19.63732375	21.23777634	-3.560461608	4.323725199	-6.664860163
am114	SHP	KITTEN	1	0	2364.811	-0.716401784	1.262396959	-1.05104452	5.921497106	1.089007739	-22.24147098	-5.16749359	-17.22774206
am114	SHF	CHERRY	1	1	1783.6273	3.343916401	3.694415685	2.582189318	1.486770264	-6.899349011	16.48342391	12.08494094	-7.726888352
am114	SHP	FLAG	1	1	3728.2594	6.685377672	4.552544837	3.827368311	3.209634186	1.290058401	-15.75064565	4.514884384	20.21253418
am114	IF	PIGEON	0	0	3527.5097	2.709721469	4.1408259	17.15097379	1.745572149	45.55346534	40.79737311	41.65886743	25.35936788
am114	SHP	BALLOON	1	1	2669.3662	3.770065416	3.808161762	15.63089262	17.5671543	6.925804399	25.69204683	21.38260301	-2.425944417
am114	SHF	CHICKEN	1	0	2631.1279	1.814980104	3.829248174	26.9075252	30.35188034	25.53448954	8.193595554	32.22577131	15.8729499
am114	SHP	BACON	1	1	2507.1606	8.160048417	3.677334021	21.36609832	32.54908069	-16.12785458	15.48336148	6.261990961	15.49936521
am114	SHF	SEAL	1	1	2186.8914	4.261421942	1.7233655	25.97194686	30.74288245	24.49042003	3.318357516	26.25559277	17.89395143
am114	SHP	TROPHY	1	1	2008.2021	0.813559759	3.409516689	12.47827071	10.67378844	5.570492535	3.650165415	17.60462471	24.55644393
am114	IP	APPLE	0	1	3499.6563	-2.658805272	1.226704965	14.85047581	4.642781215	43.92097634	20.12781086	11.90654295	46.28559387
am114	SHP	SCISSORS	1	1	2216.6023	6.926385908	2.644718434	23.33795535	23.63142967	11.00350699	42.83686599	36.23658533	-0.10305735
am114	SHP	WOLF	1	1	2906.8436	0.388262432	-2.946285935	26.10423365	35.74344522	19.26363374	29.94989375	14.38612383	-3.103851865
am114	SHF	PAINTBRUSH	1	1	2001.7036	-0.217019929	4.09608197	1.9236706	13.0118376	-9.971537566	-38.89542956	-23.84451202	16.81353234
am114	IP	SOUP	0	0	3455.837	-2.409218859	-0.784409818	1.482599652	0.459190476	-26.42027692	-22.20654064	16.72267812	19.35483433
am114	SHF	PIE	1	0	1349.4878	5.13482123	0.234901883	-2.990535639	-10.31900017	-20.8784444	33.65405885	16.57588528	-5.699045187
am114	SHF	BADGE	1	1	3308.6176	2.562994947	2.98420064	10.43695238	12.82023174	-0.17244713	16.03364094	5.878134618	8.286366206
am114	SHP	VIOLIN	1	1	1432.5606	-1.968724409	-1.860469455	4.348590677	1.194075158	25.94149055	4.117186321	-9.921314964	25.1266742
am114	SHP	BROOM	1	1	1653.1702	-1.917667729	0.910781179	-2.695498855	3.330380982	-8.684435946	-22.2088325	-13.78362529	-0.586531877
am114	IF	OYSTER	0	0	3277.4084	0.884863696	1.7455323	-12.23663183	-18.48870101	-35.06433471	4.023937198	4.049474251	0.631320297
am114	IP	PHONE	0	0	3351.9807	3.834624173	1.824782625	8.306797867	7.701714474	49.73931117	-2.111855047	10.40959144	-11.90426221
am114	SHF	PYTHON	1	1	1558.7437	4.311192812	2.2491831	12.9508444	7.707657532	17.04126947	48.14740408	2.694311602	27.03559619
am114	SHP	PAIL	1	1	1580.0844	0.48685696	2.848377398	10.87462065	24.36551729	-25.88702424	2.34357758	5.368390172	-18.02401664
am114	SHP	FLASK	1	1	2065.8158	7.731284273	7.44326274	9.222095117	9.061078909	17.55074162	53.34691488	3.990784389	-16.84180087
am114	SHF	OVEN	1	1	1468.6159	-1.562301281	-3.365558063	10.03972683	15.12211962	-0.580974538	50.61197946	3.698472286	-25.45507225
am114	SHP	HAM	1	1	1989.6011	0.461888205	4.191273238	13.79063862	12.29455518	0.146136459	-14.3285029	17.02387998	43.78319394
am114	IF	SOAP	0	0	3776.5018	-5.55151332	3.698612584	3.783728171	2.089334928	-18.60648333	7.682787554	13.21542121	11.38126752
am114	SHF	DEER	1	1	1564.9726	1.762836634	0.914587543	7.304444071	14.0945181	-13.30675652	0.97944636	-8.652042252	13.30284987
am114	SHF	UMBRELLA	1	0	1855.6717	6.222744127	2.768801544	8.86740736	9.265283323	17.93010865	-4.152068845	13.75698912	2.796172089
am114	SHP	CAMERA	1	1	3740.4515	1.676189135	-0.655131593	8.863969519	4.349083112	39.9047518	23.30711501	13.82610229	-5.404758341
am114	SHP	LAMP	1	1	3101.7773	1.912414722	2.762112484	-9.597661883	-4.718832568	-43.67885243	-3.340015148	-11.04415202	-13.25099984
am114	SHF	HOOK	1	1	1258.1594	3.311327001	-0.035562687	8.384170164	10.13971227	19.61353326	15.56006652	-2.09880612	2.04469644
am114	SHF	MUG	1	0	1780.4695	0.470982158	0.353315123	-5.745449899	-7.178132869	19.26587745	-11.58344848	-13.0127041	-1.466562432
am114	SHP	ROCKET	1	1	1570.5218	6.405489462	4.386949687	3.34491569	6.694447772	-23.75126756	18.04246873	0.572269462	-1.057072133
am114	SHF	GUITAR	1	0	1416.1916	1.352594365	2.260972178	-5.39442847	-12.03593496	-7.580183659	6.667199209	11.95650752	-2.830010706
am114	SHP	ANCHOR	1	1	1512.748	5.62522748	2.668485431	6.077969524	17.10502303	-24.66871982	12.6795804	-2.692093149	-20.07215135
am114	SHP	RABBIT	1	1	2305.8055	-0.753537846	0.722227953	22.11065842	23.65983551	18.14896891	39.22056094	9.852800947	22.68280139
am114	MF	BENCH	0	0	3330.9196	2.276121515	-1.601097278	-35.56606883	-29.8081144	-70.65996664	-57.25060684	-35.61232267	-26.70033293
am114	SHP	SOCK	1	1	1644.1163	3.101464554	1.536765394	-11.19668829	-8.825225233	4.837721961	-16.31270676	-25.87173807	-10.06438741
am114	IF	CAKE	0	1	4316.1866	-0.443210389	0.942843221	-15.77475101	-12.22650583	-37.80123919	-30.02303857	-17.81460046	-6.754369641
am114	SHP	DESK	1	1	1876.9565	-2.657173083	2.68481589	18.5394705	30.10430709	45.4814052	-41.97166324	-2.707331885	12.34530327
am114	SHP	ARROW	1	1	2222.1569	-2.22624575	0.82315338	8.503139311	9.456958703	-4.843253751	3.316641444	5.694070998	19.71243471
am114	SHF	STRING	1	1	1998.0934	4.084736485	4.25661968	20.76088456	27.15709354	2.260010939	39.11893958	12.02691398	1.58291481
am114	SHF	MONKEY	1	0	1401.194	4.906208539	4.710067463	3.93222836	1.70419623	-7.348683503	20.29070193	7.754472167	6.432483341
am114	SHP	KETTLE	1	1	1887.7733	0.395225542	1.598026899	8.402952875	9.723093151	-17.9569321	24.57584528	-2.231838097	23.12153495
am114	SHF	SPOON	1	1	3882.0561	0.350612974	0.917941487	-10.29163759	-14.37156694	36.89683425	-10.04025995	-1.302246814	-33.51271632
am114	MF	ELEPHANT	0	1	4708.1704	1.522916422	1.706667692	9.265300033	5.662190234	21.65353371	-42.75554126	22.66646926	34.21809492
am114	SHP	MUFFIN	1	1	2080.7962	4.058502812	1.80083704	-1.52068545	11.44637552	-18.25456949	-15.9029828	-24.25772646	-13.82333903
am114	SHF	RAILROAD	1	1	4343.3741	-4.159479677	-3.588141293	20.98079257	18.07888152	60.38330817	4.129316332	28.21905084	10.50811157
am114	SHP	PENNY	1	1	1579.6202	1.211205498	0.211935991	20.42563014	24.0527284	32.45514477	4.470341498	29.28874333	-6.831937132
am114	IF	BRAIN	0	0	4383.0378	2.447744811	2.535447547	-0.018536193	-6.750934601	5.579002034	6.197099256	6.153204591	16.82288004
am114	SHP	FORK	1	1	1717.1664	-2.975825431	-0.574483715	12.60093129	11.79476674	12.49589131	26.63180791	13.79501392	5.926554894
am114	SHP	COFFEE	1	1	3205.0709	4.173651066	-0.282735174	26.65533224	34.07073471	8.055071945	3.702095246	31.58922427	10.73823935
am114	SHF	STOOL	1	1	1128.2122	4.525514409	3.745494132	4.007403935	-4.557737551	-8.359084712	19.05808315	7.986910084	38.7853729
am114	SHF	DRUM	1	0	1816.7101	-2.31365689	0.030019864	29.23016936	21.16347171	60.26382969	38.09167947	40.21105384	27.76024892
am114	SHP	DUCK	1	1	3097.5488	-1.037072275	1.937863023	9.55985371	18.74505142	-11.8288571	-1.812485838	5.296222469	-8.201392849
am114	SHP	MOUSE	1	1	1418.2082	4.907401203	0.819766647	-1.932431893	2.22523508	9.97738488	-20.87620731	-3.365056994	-15.82986002
am114	SHF	GLASSES	1	1	1931.2619	6.068615038	4.732613931	-5.899379324	-13.0565763	-25.30156335	8.924815835	1.783837881	21.72865728
am114	SHP	MILK	1	1	2391.7265	3.128803256	2.273026617	8.812754485	0.643780227	10.51305352	53.30152911	17.44848923	7.156757803
am114	SHP	LADDER	1	1	2099.958	7.713508455	3.141082392	-0.789377129	10.93449366	-39.03556134	-10.84020974	-13.46522547	-9.40202984
am114	MF	MOON	0	1	1817.2552	0.117586776	0.629882819	10.58764453	3.817211297	12.65027093	22.71683936	22.4064222	18.4560537
am114	SHP	WHIP	1	1	1728.7173	-1.236226948	2.479033625	7.236557446	19.96508968	-8.652417432	-13.70442602	-1.604552131	-19.03473901
am114	SHP	PARADE	1	1	2093.6992	1.1856853	0.623399525	12.97973853	12.29453357	-0.67840761	24.51969931	13.41928298	17.19249754
am114	SHF	SHEEP	1	1	1807.5504	6.179558893	7.816429871	6.233231142	-3.820369912	-0.098552818	54.14039139	10.62826483	22.5559517
am114	SHF	BANANA	1	1	2934.8716	1.918696476	3.255866565	-7.266938231	-10.59885153	-13.57285397	9.442190531	10.7238925	-22.03825657
am114	MP	TURTLE	0	0	2798.4957	2.846333372	-1.300231811	-25.29048872	-27.01470669	-40.81106662	-30.75212286	-27.20632232	-0.619800673
am114	SHF	HOSE	1	1	2273.1547	-1.269711871	0.605815338	13.99391834	16.96183326	9.84112894	-13.45558231	4.944807901	32.19737747
am114	SHF	CANOE	1	0	2501.9619	-0.496049245	-1.645419208	-1.819496648	-1.54721907	-1.433442783	4.884254795	10.67183505	-24.64559918
am114	SHF	CEREAL	1	0	1130.364	5.25554661	-1.757656598	3.76449031	0.563114823	18.46416905	-6.257458636	11.01016203	6.458465529
am114	MP	PURSE	0	0	3943.2857	-4.278058351	-3.484121927	-8.09955924	1.992955561	-44.70436065	-13.87400513	-30.09910289	0.044523452
am114	SHF	QUILT	1	0	1467.3692	-2.261073311	-0.567583745	19.89031886	27.70253901	5.220480791	-7.64366225	-0.176389609	36.28366888
am114	SHP	SYRUP	1	1	1366.9248	2.613768516	2.691380789	14.72714347	10.88389924	12.09545823	34.38906049	24.39432596	9.418256229
am114	SHF	HONEY	1	0	1266.9008	-1.604304335	-1.751901184	-0.55993361	-9.683118803	2.299900773	16.94191111	-1.163847569	31.62663877
am114	SHP	FAN	1	1	4258.9736	4.234143701	0.959035541	-13.92900586	-21.74013536	8.715186324	-30.96928793	-3.321190896	6.063301694
am114	SMP	JACKET	0	0	3435.5205	-4.656785363	-2.036953021	-15.76856212	-23.48495822	1.248760662	-5.300297317	-15.8077265	4.086205496
am114	SHF	NAPKIN	1	0	2034.1025	0.686337063	3.079971531	-1.614417893	-14.40217824	-13.11703749	25.65823644	25.49168092	14.00360739
am114	SHF	NEST	1	0	3414.7011	-0.269047446	-2.6498686	-15.71994196	-27.49112653	32.52596082	11.35503247	-22.32543617	1.711493005
am114	SHP	DIAMOND	1	1	1236.9884	-1.867229493	3.364608773	14.44512984	24.90275555	8.135448728	-10.25829602	-6.851627194	12.30405609
am114	SHF	OTTER	1	1	1707.9022	6.41834658	2.466278184	4.008129712	19.16092938	1.589610494	-21.48962677	-11.55669205	-30.84357699
am114	SHP	NEEDLE	1	1	2111.2649	6.452984883	5.928093736	-5.919080665	-4.482372933	-17.38919874	2.543313853	-0.11820728	-18.76621564
am114	SHP	LION	1	0	3363.9949	2.273785957	-1.052260928	-4.01742032	-9.104312693	15.58590026	4.314197871	-7.925156469	7.930782877
am114	SHP	CLOCK	1	1	2662.4508	6.660501584	4.81655549	26.81252348	24.88442334	37.0375134	29.19825698	10.57671584	49.99595832
am114	SHP	LIME	1	1	1853.314	3.053337484	1.883968994	3.175691355	10.44210481	-8.688855457	1.377936522	-21.42723287	9.923886969
am114	SHF	DOLL	1	1	2501.521	4.452278984	3.188137135	14.70358208	17.09251338	45.42584596	11.61266128	-9.588859435	17.87837533
am114	SHF	MUSTARD	1	0	1795.6159	-1.384465257	1.033445548	9.454902319	11.5805984	20.14530565	11.11580529	6.433420998	-4.882162783
am114	SHP	BUTTER	1	1	2481.8149	4.383994708	1.785610559	15.3526768	21.19072671	12.39194293	-5.350827471	4.240146218	17.20357443
am114	IP	BARREL	0	1	3240.6953	0.326907201	0.227331439	17.66230794	11.02614809	6.546382366	26.65795913	45.87991518	13.29486636
am114	SHF	CAPE	1	1	1777.232	5.745684214	3.461328638	-7.527822298	-5.787544036	-24.05233039	-16.52217517	-14.23158352	9.649930458
am114	SHF	CIGAR	1	0	1328.1493	7.371705938	1.371090762	-0.228661101	4.930486596	-21.60373567	-33.51674918	3.582256777	4.87577907
am114	SHF	SHOVEL	1	0	1382.3745	-0.033330699	4.002118866	-6.021876756	-8.348925996	2.73087684	21.51435323	-11.82878834	-10.29524378
am114	SHP	MOTH	1	1	1851.7883	2.489072068	0.957843816	-11.02281296	-10.48192294	-31.53524926	4.928216645	-6.189826607	-17.11972101
am114	SHF	GOAT	1	1	1307.0543	7.156188206	3.21702808	9.931221299	6.818251148	0.912840108	28.15624857	25.16378919	-1.382198324
am114	SHP	JELLY	1	1	1845.9879	5.117993901	7.360081879	13.22768611	17.89194459	-11.89067059	-20.24061193	27.89837473	8.602125392
am114	SHP	TIGER	1	1	1268.2491	1.829238654	-2.193196471	7.962844646	0.47356226	29.86240136	5.092552859	16.86976955	20.02183052
am114	SHF	COUCH	1	1	1461.6182	4.004824931	4.541777218	-0.610868184	0.519551172	19.56424739	-12.97038685	11.27067586	-27.40678154
am114	SHF	SWORD	1	1	1683.5799	6.283747477	2.371427042	0.373066437	0.156736956	10.65505928	-15.1901073	-10.69197977	19.7524516
am114	SHP	PAN	1	1	1179.7125	4.93108965	2.949018335	-17.95783392	-22.92532216	-15.22945283	-24.47585457	-9.795078873	-2.332034672
am114	SHF	WINE	1	0	2792.1295	3.003562838	-0.584242946	8.653106606	7.112651165	8.236955125	-3.633245662	27.86454589	-1.63537594
am114	SHP	PIANO	1	1	1883.3414	5.446959882	4.836409016	0.065008069	1.947885378	7.150700403	22.301347	-18.33270247	-3.199879388
am114	SHF	CARROT	1	0	1411.4102	4.499988008	1.424273354	3.069725569	-0.149240286	26.36116705	32.45643637	-9.787664252	2.012533955
am114	SHF	STAPLER	1	1	1407.1945	0.632549369	-1.689822872	-1.265106117	-5.48865893	7.565206522	-26.53400116	16.33691686	6.073234153
am114	SHF	MITTEN	1	1	1465.3735	1.462447241	1.286789096	-23.51057333	-19.39461617	-36.10612508	-51.98938189	-31.15492443	-6.638061952
am114	SHP	FENCE	1	1	2161.4682	6.969634661	3.243859273	10.58225475	3.909572156	21.88470993	1.234110425	9.842339241	42.81924105
am115	SHP	CORN	1	0	1680.2401	3.446580562	-2.671263918	-6.976555634	-6.001360407	-4.763722316	-3.550296088	-12.90618406	-8.216162005
am115	SHP	TOAST	1	0	3205.7549	4.34010152	-1.226316343	13.20833075	18.38298123	-8.780016041	-6.928373382	25.26570894	13.93290687
am115	SHF	KNIFE	1	1	1440.958	3.144022862	1.55776264	13.20080381	17.00712171	-9.897759032	5.885149122	29.39168535	9.404861112
am115	SHF	CRADLE	1	0	1300.4923	3.093783588	0.514549336	-20.2775451	-5.493064955	-26.90504119	-40.64574019	-58.04252915	-18.52934487
am115	SHF	CASTLE	1	0	2407.5936	-0.660933833	-0.012935414	0.475827137	-0.953160838	21.57928928	-26.22783731	-1.266440254	4.864867739
am115	SHP	MONKEY	1	0	2935.1768	1.730690201	0.655912907	3.993813434	8.722581747	2.572916286	-0.600536674	2.289622754	-3.867265084
am115	SHF	SEAL	1	0	3220.246	-2.105242207	-2.730110452	10.63483781	18.15900795	-7.508358172	7.279761391	23.50102963	-4.986960818
am115	SMF	ANCHOR	0	0	2831.3934	5.350286368	-0.476789919	-5.126754157	-5.968039157	-14.01329146	15.79707861	-16.39889662	0.562253026
am115	SHP	SOCK	1	0	2415.7147	3.479874145	3.475287862	4.370253329	7.022190012	-53.84260565	37.78794218	15.74640351	9.175474623
am115	SHF	BARREL	1	0	3012.8992	5.37075783	1.014098958	15.9917174	17.76477051	18.57596853	-13.26821587	17.31558824	22.28621382
am115	SHP	ORANGE	1	0	2116.3041	3.027331026	-1.118819793	3.759039323	-2.703098253	5.408614852	-11.50463121	26.8640845	10.10556563
am115	SMP	RAILROAD	0	0	3397.6136	4.833390291	3.449400298	17.11158862	21.45644552	2.797112597	30.29571953	13.09928341	11.4052321
am115	SHF	CROWN	1	0	3228.4713	0.664949262	2.525878333	3.285573944	3.937498768	-15.11059331	21.68873341	-7.021792816	11.29982814
am115	SHF	NAPKIN	1	1	1101.013	1.030733263	1.639378063	-7.790051538	-6.029999167	16.59293261	10.78546295	-30.22601752	-19.60667757
am115	SHP	HIGHWAY	1	0	3111.062	1.733162722	0.260295385	-2.908643178	1.52981916	13.12799257	-16.81290088	2.407088033	-20.98693984
am115	SHP	CAKE	1	0	1986.7083	1.204979827	-0.349944732	1.946172485	5.547575761	-2.787371864	-10.91029739	17.44629083	-9.215340096
am115	SHF	BROOM	1	0	1726.2486	2.773328524	-0.94503443	5.958352793	10.64629735	29.96474929	-7.187807606	-6.94918061	-5.265280581
am115	SHF	CANDLE	1	0	2129.5039	3.255866053	1.803414454	5.166642368	13.41601653	8.753276546	3.022115961	-25.30192279	4.136432381
am115	SHP	BELL	1	0	1991.8299	-1.938540836	1.211468464	18.23246344	9.486844311	9.227993404	0.261570714	29.43414653	46.06403466
am115	SHP	PIGEON	1	0	2029.6576	6.309806644	2.770797241	-1.45512871	17.01221472	-40.3220461	27.38751371	-37.4863623	-13.36413173
am115	SHF	SHOVEL	1	0	1712.4222	5.616770111	1.488321242	5.303145057	6.570178154	-10.62811639	13.06822297	11.02865558	4.076270397
am115	SHP	HOSE	1	0	1870.4257	1.809956565	2.062003713	7.306933856	7.542599575	25.72408542	-26.10106774	3.290662931	13.67094059
am115	SHF	VIOLIN	1	0	1454.8234	2.831642297	2.021397903	4.56170717	2.733670885	2.865135263	8.977194312	2.455429846	9.639677824
am115	SHF	CANNON	1	0	1786.1377	1.927238936	3.745990541	-2.258507817	-2.973400523	-8.212813716	-3.875138604	-11.18410479	9.941742826
am115	SHP	PLATE	1	0	1007.6585	2.636290286	-0.895030957	-10.79535803	-10.33815973	-13.3260593	-0.687514989	-32.91370876	0.202405512
am115	SHF	COUCH	1	0	1638.9553	5.621727207	0.899401168	-4.094842154	-3.238193287	-12.34119718	-18.90903953	-4.993834743	5.92632837
am115	SHF	CEREAL	1	0	1771.8101	2.504284222	2.070707742	-10.14172037	3.05887614	-13.94854375	-30.38010955	-26.15563126	-21.08647578
am115	SHP	TURTLE	1	1	2000.5578	5.280685055	-0.668929205	5.348645397	5.286676469	-6.527024215	7.88385555	2.221308732	13.53569106
am115	SMF	CHEESE	0	0	3255.0059	-0.400077357	1.374223086	9.356106349	6.064529695	39.48629547	17.90805974	-24.58697118	19.35110668
am115	SHF	MOUSE	1	0	1343.2078	-0.566522203	1.204827222	-8.620575961	-13.79232602	-36.4699536	-9.235216865	25.49339415	-2.280813982
am115	SHP	OTTER	1	0	2544.2139	6.645349835	3.180641078	17.50981787	32.45256347	-25.24939164	26.3977084	34.69089674	-10.79845244
am115	IP	TIRE	0	0	1873.1929	1.524047296	0.951167149	-12.13578983	-23.90434963	12.00555663	11.74479821	-5.92935406	-11.73104884
am115	SHF	WOLF	1	0	1037.0805	7.884792745	0.655235349	16.49088537	12.28417742	43.84874786	8.064450354	8.261546028	20.41004578
am115	SMF	TAXI	0	0	2528.6423	2.440447417	-1.129912835	7.803072837	7.551762854	-4.59236749	-1.007039848	19.23499453	11.88037186
am115	SHF	KETTLE	1	0	1381.5053	1.533330889	1.543287553	3.396436789	9.315151088	-9.284605274	12.66126878	10.89283178	-13.4028403
am115	SHP	CANOE	1	0	3818.8066	4.976663295	-0.089401255	9.969608749	25.42510116	-13.23481082	-0.119341948	-8.047877451	1.593881926
am115	SHP	MITTEN	1	0	1873.938	3.533952267	3.361538352	-0.762024429	3.265917547	-14.6516097	22.38936585	-10.06622025	-6.778465645
am115	SMF	OVEN	0	0	3260.063	0.226013966	-3.606030989	2.05331833	-0.632051467	9.946109441	-11.7589261	-2.246264831	13.36779123
am115	SHP	PYTHON	1	0	2094.5624	5.099928429	0.82211466	4.2956089	21.12567413	-41.47007942	20.79287887	-11.63641633	-7.652651277
am115	SHP	SHOWER	1	0	1460.4553	1.857970271	1.847354993	9.611000395	11.38282574	-3.272765685	21.20060042	9.024336984	7.922951319
am115	SHP	FORK	1	1	1392.2539	-0.593785564	1.765356947	24.55408997	25.72867191	17.29595512	-1.135822041	46.2879715	22.52375174
am115	SHF	CAGE	1	1	1510.1447	3.534633999	-1.150278122	4.014143042	13.44792985	-34.6351992	21.60712559	-9.183724968	4.170403357
am115	SMP	PIE	0	0	2025.6651	1.596690289	0.945999818	2.8534858	-8.134820277	20.39405569	24.8662574	3.02710933	10.1854457
am115	SMP	PILLOW	0	0	1428.6113	-6.072368475	-5.154974902	-9.953573157	-6.362373689	-18.74503309	-10.53711147	-17.27594886	-8.526271279
am115	SMF	APPLE	0	0	1924.7778	-0.269756847	-0.649935054	1.937061148	3.405613527	15.24025663	5.454625761	3.864620231	-12.55634805
am115	SHP	ENVELOPE	1	0	1460.3332	1.620642718	-0.138436183	8.486894761	25.48854791	-19.0490378	-23.82066211	1.732070107	1.04941054
am115	SHP	SPONGE	1	1	2809.9289	1.112666456	0.808878018	6.038399545	4.738170296	0.136729392	4.44528775	16.0973134	6.611366648
am115	SHF	LAMP	1	0	1405.3544	0.230097054	1.322041796	-1.086327226	-8.042349462	32.03638396	6.656221691	-7.269825974	-2.339305981
am115	SHP	HOOK	1	1	1827.5708	7.846502847	2.653696336	-20.38113249	-37.19558396	-2.22383402	-3.724699266	-5.220570565	-6.58652477
am115	SHF	LOCKER	1	0	1275.8741	2.019401102	-1.864380985	-1.694125085	-11.60100604	36.81573916	12.62807444	-15.2351456	3.415202055
am115	SMP	FAN	0	0	1249.6842	-0.565099025	2.948017663	-7.176845772	-7.087023749	-6.919665634	-21.61312893	-21.00034388	8.476645499
am115	SHF	MOON	1	0	2001.151	2.078241574	0.818361901	-6.239478724	-3.465456923	-10.89363266	-25.55570197	10.2567053	-13.12540407
am115	SHF	QUILT	1	0	1423.2587	5.311791269	1.80127136	2.28025361	7.793876019	-19.47738546	3.159109287	19.74263932	-11.19862533
am115	SHP	SWORD	1	0	2458.7226	1.577463776	-1.044495549	5.336159049	12.7981928	-26.39874666	-10.86673553	15.64082993	5.474487215
am115	SHF	UMBRELLA	1	0	2098.0541	3.53900147	0.105141376	13.15675785	13.32490058	-15.535596	21.18577839	38.6228739	8.549399041
am115	SHP	CAMERA	1	0	2571.5774	5.070634417	0.653963996	-3.028922988	-6.178893945	-9.216524144	14.32249701	13.34941483	-10.5172243
am115	SHP	SHEEP	1	0	2409.5939	-1.822342709	2.022777597	-3.907972577	-1.393315927	-8.014841805	7.915261817	-19.46572368	-2.466534717
am115	SHF	MANURE	1	0	1240.1044	0.748055814	2.486371447	6.205930939	23.95481583	-47.5956465	5.806817759	2.590646125	-4.157082065
am115	SMF	NEEDLE	0	0	1744.2386	-0.0296143	-0.269763057	-1.616172713	14.54427761	-36.7261365	-20.03798986	-2.231488156	-12.94478894
am115	SHP	PENNY	1	0	1796.2025	-0.889199721	-1.877366225	11.30659964	18.36545746	10.20222176	-5.203671904	-20.50952021	23.47404343
am115	SHP	CIGAR	1	1	1635.1456	3.406921295	0.993717543	20.87340984	28.0991969	-8.589023254	9.397095447	25.87592767	21.77897892
am115	SHF	GLASSES	1	0	1394.1978	0.870716214	1.376098727	-5.927151427	-18.22490904	22.55784315	-11.40067426	-2.080736846	8.12678152
am115	SHF	WALLET	1	1	1344.1892	-3.438063011	1.923615965	-2.527822647	-14.84553524	19.69255349	24.21479357	-13.72871919	11.08733079
am115	SHF	COFFEE	1	0	1177.2209	3.718881272	0.226225035	0.690630104	-6.925988093	19.47371782	-17.8697692	16.97888302	6.001641242
am115	SMP	HAMMER	0	1	1845.8544	1.774866308	2.065583776	-6.037746959	-11.6093669	22.06266525	-13.07941594	0.343818232	-9.788951909
am115	SHF	BASKET	1	0	1447.5792	-1.308305561	0.357740399	-15.64885129	-19.09226007	13.39819105	-10.46692328	-17.97516031	-24.86544771
am115	SHP	DOLLAR	1	1	1577.3325	0.270201718	-0.710357327	-6.443747113	8.797136596	-55.13622733	2.392218192	-1.304105077	-23.68642338
am115	SMP	STAPLER	0	0	1432.3211	4.612142653	3.84088255	-6.160259265	-7.206689776	2.432828286	5.861587079	-9.279885816	-11.88036779
am115	SHP	MUSTARD	1	1	1220.3702	3.814282121	1.23611222	2.554729787	18.09350268	-39.9694843	-6.794692767	-11.5452379	2.36434079
am115	SHP	PAINTBRUSH	1	1	2760.1318	1.874891036	1.139076991	-20.17300354	-40.57063405	16.97284626	-12.32749062	-22.12931636	7.204565368
am115	SHF	ROSE	1	0	1183.2344	0.797516394	0.56320136	17.62610604	11.56474295	46.34510773	2.031736921	24.94693763	17.96272449
am115	SHP	STRING	1	0	2216.0511	4.751247282	0.409306627	-3.684987171	-16.23097344	14.35898053	-1.528459297	-5.976366629	17.94901998
am115	SMP	CRAB	0	0	1318.228	2.901610865	1.022536934	-0.123215499	-3.988595205	13.94149066	-23.52826143	33.7711313	-11.42881629
am115	SHF	MILK	1	0	1084.1358	2.897664275	3.386490637	18.28648442	29.43641851	-2.256594299	19.90672827	0.08161096	14.05741432
am115	SHF	CLOCK	1	0	1635.65	5.131908473	-2.221852261	-1.097929007	-13.90986079	21.53237054	3.000436178	13.06373938	6.296257876
am115	SMP	HONEY	0	0	2660.3503	-2.353489453	1.103178297	7.461515493	21.56346229	-31.65099261	11.83348512	-19.5561482	11.57698001
am115	SHF	JACKET	1	0	1091.3877	1.485237889	3.77719458	3.634763527	6.950357984	4.204238089	-0.287823713	11.72506798	-8.876167866
am115	SHF	POTATO	1	0	1436.3044	-0.176394113	1.917047737	4.884444444	2.610361631	-16.14238616	-1.395404436	13.08252029	20.26037932
am115	SHF	FLAG	1	0	1244.8748	-0.256362518	-0.975066569	-10.26848847	-16.22014032	-7.559627395	-1.180467918	-0.822908731	-7.435834059
am115	SHF	JELLY	1	1	718.582	4.365794401	3.972467841	5.51606276	-1.61048401	7.585041173	10.61504722	-2.250359498	25.34228163
am115	SHP	MAGNET	1	0	1380.6337	1.420154513	2.714300656	-15.52141791	-16.17583787	-33.04645276	-22.13530542	-10.00313255	-4.314120891
am115	SMP	BADGE	0	0	1055.5324	-3.256461468	-0.842725216	-4.077987067	-13.04263135	12.5933786	-9.902122503	-10.12961678	15.51001601
am115	SHP	BUTTER	1	0	2811.92	-1.458915509	0.62210994	6.683343629	22.93219573	-43.35046469	-16.03458419	-13.53014593	19.38437066
am115	SHP	NEST	1	0	1266.5572	-2.128974174	-0.823661568	2.893578966	11.29903966	-34.78005665	-16.28460352	5.312653049	10.93045659
am115	SHF	CANE	1	0	3755.1449	3.291600427	0.905570512	1.466065587	5.768320165	47.76117138	19.01083544	-16.98655979	-32.00891242
am115	SHF	CHERRY	1	0	1812.9064	0.935833978	-0.505535245	-0.210015598	3.042556989	16.8578771	-1.1779172	-26.58037337	0.061662985
am115	SHP	TRAY	1	0	1382.468	-1.022792197	3.30754208	23.21202889	15.30363472	12.04858817	56.5098232	1.722815478	49.54820273
am115	SMP	CAPE	0	0	1589.9124	2.110055007	-3.034739056	-15.29460863	-19.13394554	-31.34349522	-4.539657387	-13.80630205	-1.983067078
am115	SHP	KITTEN	1	1	1150.3007	2.344856873	-2.801942639	5.678143445	15.6680026	-13.18932507	-5.803502931	10.64383074	-6.638856247
am115	SHF	SOUP	1	0	2636.5953	3.992893676	0.822147697	2.895895236	5.981541551	4.890007973	-1.136744894	-4.251668545	0.659463867
am115	SHF	SCISSORS	1	0	1034.5963	-0.547732968	1.747707292	-8.326823056	-18.04776054	12.09630162	21.19365713	-2.832170781	-12.95445169
am115	SHP	ROPE	1	0	1689.4671	-1.91361414	5.242577748	0.352452942	-10.5065983	61.03926829	-8.574231429	-12.37941352	4.695059336
am115	SHP	TOILET	1	0	3190.7729	3.271550808	3.167155992	12.46189329	6.851279738	24.26007468	3.944039634	12.29422128	23.6239908
am115	SMF	BENCH	0	0	2833.1445	-4.980700099	0.020137588	-3.240297871	-3.975251508	-13.6517881	-9.941896536	-2.390703524	7.21603732
am115	SHF	MUG	1	0	996.7819	2.048226776	3.991780616	-10.72302013	-19.44674755	-51.23798615	10.36693176	22.54568634	2.862182897
am115	SHF	BOWL	1	0	3337.6127	-4.089822336	0.080586755	-25.64414388	-28.58933043	-2.45229541	-34.30399673	-31.16370001	-24.20830963
am115	MP	STAR	0	1	3459.3996	0.550071533	-1.177791254	-2.097315062	-10.81208854	4.244737955	15.93017169	12.17873295	-1.792612526
am115	SHF	PHONE	1	0	2252.3498	1.330636397	-2.279243494	5.881832482	5.986930446	12.55451861	46.48107855	-22.86449496	3.11732563
am115	SHF	MOTH	1	1	1796.1031	3.040954854	1.404272035	4.551413976	-1.493435459	14.95840159	14.11050302	8.912357791	6.35327586
am115	SHP	WINE	1	0	1250.4964	3.764450243	1.276746591	3.950609447	17.58541084	-35.59033459	1.597001489	-15.23568912	7.14790232
am115	SHP	PIANO	1	1	1690.2669	1.072712354	2.353648821	10.09745529	13.16199339	-11.36522422	-11.73789368	29.66781614	11.44006261
am115	SHF	ELEPHANT	1	0	1286.5582	2.895846028	2.135852052	-23.61750385	-25.00506287	-21.89243001	-26.22934745	-36.84235177	-10.85099839
am115	SHP	DRUM	1	0	2373.2641	2.509899994	0.96062024	9.193239253	9.340187572	35.30532608	-15.13963498	13.13570265	1.655233123
am115	SHF	LION	1	0	1071.5957	0.849914784	4.160478363	8.191519493	14.59840557	-27.06800847	20.36089571	10.68440798	5.643101701
am115	SHP	BRAIN	1	1	2089.1865	-0.720280727	3.510377647	4.415842722	4.723268216	-24.89247815	19.55611876	5.547336562	13.35568635
am116	MP	NEEDLE	0	0	1145.0575	-2.303285902	-0.449976117	-3.407380158	12.91588376	-40.69113238	-27.68449751	-24.77456755	-3.762260322
am116	SHF	PHONE	1	0	2233.7141	-4.009278267	1.369663692	21.88171303	39.88158087	7.476819218	10.81307428	-15.18610227	4.298811374
am116	SHP	VIOLIN	1	0	3420.711	1.494195622	-0.1266873	6.60916305	-5.532520386	23.26835443	20.74532004	19.27460465	21.27060808
am116	MF	TIRE	0	0	1097.8739	5.037317451	-0.145201109	17.00182688	31.99483512	7.65373761	-24.80070448	-16.94608539	16.02592719
am116	IP	KITTEN	0	0	2818.2896	-3.200101502	-0.63209938	8.791046007	-8.52243398	49.33610558	19.48974196	18.49680322	26.54463058
am116	SHP	OTTER	1	0	3276.5945	5.039964386	1.988893073	-8.960652379	-15.40213812	-9.976647618	12.17410914	6.291984135	-6.00407223
am116	SHF	MUFFIN	1	0	2658.0293	0.378474841	-1.209398638	9.970933992	7.848492074	41.14917419	18.88789315	-23.39456586	18.476653
am116	SMP	HONEY	0	1	3416.7316	-3.773800751	3.288160539	21.69672803	7.936304559	61.8218777	12.84376111	38.74485058	27.02853462
am116	SHP	TRACTOR	1	0	2415.9649	1.638129974	-0.924060517	13.16663722	23.31532876	-19.92842436	5.99777554	-2.697421473	20.93979404
am116	SHF	DESK	1	1	3355.4071	1.525692902	-0.141649605	-20.0223452	-33.82145908	-19.63474782	14.31499911	5.067076162	-4.407558295
am116	SHF	PAIL	1	0	2258.6184	-2.910762481	-1.427921698	25.41894423	44.84102332	4.466604604	43.78190747	6.468782456	-20.79385587
am116	SMP	MITTEN	0	1	3249.4337	0.606695296	-0.568376159	21.0725237	50.64929019	-21.44887948	-18.06519621	-10.568429	-10.2934842
am116	SHP	SHEEP	1	1	2188.0358	0.974867115	0.792298163	17.43814743	25.30999819	-8.159062336	-17.71290423	21.14917886	20.23595992
am116	MF	MAGNET	0	0	1615.8652	2.026350744	-0.400615478	30.86415171	18.44264329	15.90983536	84.17353435	63.71288706	39.75218867
am116	MP	MOON	0	0	2040.3929	4.179348839	-0.421464552	15.36974648	35.66421733	-30.76371696	-5.231599045	-3.552026991	3.678752831
am116	SHP	STAR	1	1	2634.0827	-0.030828059	-0.326937851	-7.057698362	-27.47621477	-18.55420376	47.03827018	45.00619403	11.3172761
am116	SHF	CRADLE	1	0	2736.3866	3.64850837	0.883331452	-5.221971394	-3.428036992	6.580962754	-12.42348247	-7.918396526	-17.14994943
am116	MF	PENNY	0	0	1390.7162	-1.920958997	-0.30716004	5.246796866	7.122783875	-16.36396357	-30.42462323	31.67442589	6.549374779
am116	SHF	CEREAL	1	1	2348.5435	2.11763117	1.334896565	5.42379006	0.53582053	-15.73254111	12.21722107	19.38814964	27.14110187
am116	SHP	WOLF	1	0	3537.9286	-1.045161521	-0.065903748	9.01360383	8.717207319	23.60001548	16.83730952	3.685439151	-0.853834731
am116	SHF	CASTLE	1	0	1802.8478	1.959969695	4.533523225	-43.77787123	-59.11999468	-36.43682608	-7.609008014	-29.66933789	-18.73036091
am116	SHF	SOUP	1	1	2769.9715	2.333033316	-1.974218755	-5.226468093	-10.76587331	27.81040383	-27.84977319	1.792994617	-10.46482035
am116	SHP	COFFEE	1	1	2344.5282	-0.544849267	1.196150979	18.71843908	17.30681785	-1.574309397	18.86481827	51.26376271	11.40020926
am116	SHP	LOCKER	1	0	3174.2999	-3.718921088	1.348012035	-4.980877554	-15.96702074	-12.39624655	-20.21837311	19.45740264	27.21006802
am116	SHF	PAN	1	0	2266.1771	3.150562132	1.033564642	-12.43874448	-12.89511546	-10.02099461	-11.94250646	-3.906371379	-21.04119731
am116	SHF	LIZARD	1	0	2336.8639	-0.979069442	-0.21724771	-3.295457063	-14.24009312	28.95394519	-0.852692974	6.046941876	0.801849207
am116	MF	RAILROAD	0	0	1694.4691	-4.562161319	-3.310913513	19.87704225	21.10293808	6.423480673	43.28053428	42.91008077	-4.095403388
am116	SHF	CHEESE	1	1	2476.3581	1.158924801	2.488285456	-23.91876542	-38.43910271	-49.94442159	41.57503298	-4.783109491	10.87555048
am116	SHF	BANANA	1	0	2360.4852	0.476810089	2.169024472	14.50146877	30.50772018	1.187378257	32.08939927	-15.20480544	-14.79756667
am116	MP	GLASSES	0	1	2024.5909	3.562954343	0.385023044	8.684399512	10.32772555	-3.471515194	-38.76984332	28.43928865	13.56418012
am116	IP	PIGEON	0	0	3042.0999	1.566009065	0.337244476	-6.033237888	-11.7320537	5.721290308	16.26404414	14.82004013	-22.97011065
am116	MF	ANCHOR	0	0	2807.8504	-3.223482027	-0.093765985	-12.87073592	-22.64860664	-11.55658503	-39.1621064	17.87980546	5.441750452
am116	SHP	RABBIT	1	0	3353.2859	2.399834509	-0.914594194	-1.249790932	-6.562224615	-5.83384201	11.99314217	18.63539203	-0.696362102
am116	SHP	GOAT	1	0	1438.953	1.694300717	-2.887017699	-6.99029783	-18.48436536	6.204923747	-1.259304667	-5.798140458	22.41054449
am116	SMP	CRAB	0	0	3579.8349	1.076660973	-2.257713469	-5.510298722	21.37913261	-41.37868014	-18.44720594	-37.02378177	-43.01976569
am116	SHF	SOCK	1	0	2212.1556	0.631228766	-2.406939743	-3.722682377	-16.62788943	11.81795149	31.20256157	-0.339630122	15.25179486
am116	SHF	NET	1	0	2120.6951	1.00330845	-0.206685096	6.602178588	10.73367892	-2.289791211	-11.29174461	11.43922966	1.115065137
am116	SHP	CARROT	1	0	1962.9234	-2.500480187	-0.535212878	-7.377753646	-2.064878082	-21.72197764	-14.39508696	-14.82624801	-5.433292773
am116	MP	TOILET	0	0	3480.541	-1.796176805	2.403431373	-14.71215935	-24.44606145	11.12232063	13.79138308	7.664826656	-32.4002517
am116	SHP	PLATE	1	0	2562.0677	-0.500442838	0.544960074	11.11124976	-5.951411694	43.54271401	27.91682663	48.98756571	6.076545248
am116	SHP	FAN	1	0	3698.0646	-1.727236423	3.186329662	-3.595421098	2.09040428	-1.430603818	-76.72029672	-9.007022481	7.023133538
am116	MF	CANOE	0	0	2208.0917	-2.421584272	0.461477285	25.63994715	31.49617039	21.4348172	10.996068	26.74805182	11.54146631
am116	SHF	WINE	1	0	2085.6549	-0.471641818	-0.707475718	2.698575079	8.927565473	-1.310945352	-28.8810249	-12.54708382	9.200992241
am116	SHP	SHOWER	1	0	2600.297	-1.585254683	1.794773286	18.95375343	19.90590358	3.225618772	-2.686382168	18.59513563	38.20851196
am116	SMP	STRING	0	1	2529.3025	2.084355959	-1.264452101	24.74470258	34.39267476	-3.892433923	20.06089973	20.67235534	18.41577579
am116	SHP	DRUM	1	0	2606.8635	2.374642308	-0.727990185	6.989762931	8.986711363	7.940697402	16.13516504	-3.672806491	4.779043983
am116	SHF	SWORD	1	1	1574.259	1.686228166	-0.043604238	-13.98449384	-11.58951841	-34.4435559	-23.51056554	-10.66413401	-4.476757795
am116	SHP	CHICKEN	1	1	2574.6737	1.891325549	3.31763617	0.046830375	-6.629787186	2.582625188	14.02149939	16.96135606	2.094624326
am116	SHF	LADDER	1	1	1593.557	2.964368665	0.626995321	-16.56097373	-17.43641018	-20.20111291	-37.4185627	-8.193761207	-9.439261067
am116	MP	DOLL	0	0	1695.1411	1.917613018	-0.718189512	-21.45771199	-22.02897112	-20.91401394	-24.74233343	-8.239570384	-30.85028668
am116	SHF	PYTHON	1	1	1772.7513	2.823315588	0.343323373	7.000003834	16.5012639	11.54778509	3.579926292	-29.55934741	2.012351162
am116	MF	LION	0	0	1565.5746	-3.93262583	3.33321599	-6.576451141	-1.717016837	-15.52809815	-31.09912523	-18.46117848	3.585187859
am116	SHP	KEG	1	1	2597.251	5.444888057	0.456416303	29.70984785	24.85812247	42.53808976	32.48642565	30.5133891	35.28339407
am116	SHF	MAP	1	0	3078.5228	0.313192292	-2.067250812	38.11125922	41.3425985	47.51689496	19.91765994	23.532312	38.35090748
am116	SHP	SOAP	1	0	2913.3893	-1.717676784	-0.624364167	1.77170908	16.37031742	-8.049067035	12.50988117	-16.87239956	-32.82255025
am116	MF	PURSE	0	0	3328.1879	-0.127336643	2.666090113	-29.68179328	-40.56033767	-66.20685303	9.850688543	7.078781359	-5.852420661
am116	SHP	ROSE	1	0	3227.6539	2.839096047	-1.125755952	6.276563025	-1.221607715	0.249227857	57.24652081	33.42009732	-5.459297437
am116	SHF	BONE	1	0	1395.2897	1.773301941	2.105557321	-52.76257338	-48.09198656	-88.11930853	-77.0331846	-39.85347683	-41.99760503
am116	SHP	MOUSE	1	0	2485.1669	-2.781844383	-0.545042674	-30.51058522	-36.04477583	-14.30561426	-55.77187203	-7.257126752	-35.12779394
am116	SHP	UMBRELLA	1	0	1853.9775	-2.67372296	1.974760934	16.9702869	24.45369034	7.023511338	2.066941393	2.282906981	16.62178388
am116	SHP	ELEPHANT	1	0	2455.2743	0.306928994	-0.378426651	-5.878637424	-7.971152603	1.529431788	-29.92283858	17.94474637	-17.0734981
am116	SHF	COUCH	1	1	1483.0638	-1.375787291	-0.680599251	-10.09832671	-2.177616964	-11.82944732	-49.57245102	5.610414292	-38.12223803
am116	SHP	CAKE	1	1	2469.8647	1.660054994	0.717138049	-1.186508498	13.3804904	-12.11782906	-4.160804679	-29.5422264	-20.01304283
am116	SHP	GUITAR	1	0	1855.2732	2.85918067	3.159355945	46.12048924	56.4037576	23.74671378	41.76551994	32.21657986	40.9262066
am116	IP	CANDLE	0	0	3378.7044	-0.855346387	-1.035556083	24.89386531	17.3554464	40.67449986	78.88826221	39.90715907	4.258483309
am116	SHP	MILK	1	0	1899.7067	-0.48397492	1.926828602	-1.543469482	-3.295922901	-1.255588097	-29.89551656	-13.82715881	27.96479182
am116	SHF	CIGAR	1	0	2025.4554	5.1578927	1.389260706	-1.8190298	-2.58681404	25.19043134	43.19678803	-1.321301162	-41.29200816
am116	SHF	HOSE	1	1	1955.4861	1.225657084	-1.350340564	1.735027686	-2.713599861	28.36709334	7.509463882	6.386169013	-11.27152717
am116	SHP	LAMP	1	0	2613.5128	3.550766147	-0.82764638	-14.94564952	-9.88594685	3.017675239	32.90729865	-21.82875074	-63.17570193
am116	SMF	DUCK	0	0	3121.5392	-3.39955288	1.52750865	-6.314364814	-3.650548377	-20.50318333	-22.25464119	32.94042477	-34.63645983
am116	SHF	BACON	1	0	1691.0412	-0.771836519	2.12092711	-3.980151541	1.61955215	-20.25241339	-16.24893874	15.30635221	-24.50141145
am116	SHF	CORN	1	1	1571.9743	0.976017167	-0.228877512	-37.79996996	-50.25782364	-39.67740503	-4.425244958	-5.102980769	-32.1511675
am116	SHF	FLAG	1	0	2462.1565	4.341373616	0.820768175	-23.36067832	-22.10415909	-33.66007757	-65.13729163	2.38372699	-26.54870369
am116	SHP	DIAMOND	1	0	2194.4384	-0.480173979	-1.715561458	4.557880066	9.096490212	-1.759510178	-0.635687548	4.762474989	-5.52985789
am116	MF	APPLE	0	0	2849.1543	0.810212743	1.656744527	6.58235473	6.959235146	15.38020486	-23.01760501	14.07815499	2.213381481
am116	SHP	OMELET	1	0	2295.1134	2.065575401	1.188025874	-5.02792864	-6.501454748	-19.36381895	-67.19349029	9.306923504	24.86566814
am116	SHP	WALLET	1	0	2555.4713	0.363498461	0.731683684	-6.84125353	-19.38819368	-3.94614697	15.32031182	30.28762759	-4.720883265
am116	SHF	BARREL	1	0	2475.4343	7.000214919	3.310256099	-5.369342965	4.78256646	12.63462275	-21.61202865	-20.64775778	-39.63337345
am116	SHF	JACKET	1	1	2841.5466	2.973164533	1.340330341	-3.757273772	3.527179636	-0.600748331	-26.36651591	-30.88862551	-0.088459983
am116	SHP	POTATO	1	1	2237.2833	4.012599175	1.332199589	-8.184770521	-19.44148917	-9.903033343	-6.045805997	-6.53301971	34.48125797
am116	SHF	BENCH	1	0	1785.805	-0.270532817	0.405901946	-9.668773284	0.49754833	-30.57472416	-36.11369312	-45.31880561	13.66188485
am116	SHF	PENCIL	1	0	2174.5302	-2.635917577	-2.434823459	27.5816305	36.46872869	61.25842174	43.25004303	12.88329329	-29.02185528
am116	SHP	WHIP	1	0	1963.74	5.001466416	3.356779371	13.68930646	7.812670681	12.06857243	46.3200699	33.75915263	5.829954021
am116	SHF	ROCKET	1	1	2234.7482	-3.156827323	-0.123747175	23.05672651	19.87824605	17.19159953	35.45401317	32.29041233	26.85228114
am116	SHF	KNIFE	1	1	1432.5061	-1.922660468	0.472173171	-13.56077774	-1.143938265	-32.38221739	-2.215380869	-18.96466387	-44.47358071
am116	SHF	BROOM	1	0	1578.6741	1.727993023	-2.919248679	1.142351478	-4.996185241	-2.908662192	-51.29621175	9.464939408	41.75223078
am116	SHP	MOTH	1	0	1956.7867	-3.400395493	-0.820823532	-51.07266136	-56.0629356	-21.85232124	-54.36072255	-36.78086411	-69.69742509
am117	SHP	MOTH	1	1	1438.7859	5.700808548	1.820332556	23.41885807	31.45649688	13.09838766	4.658982006	15.07319062	29.56912286
am117	SHP	PYTHON	1	1	1468.7056	2.006351129	1.335022322	25.63924392	38.19671337	-3.702938953	4.235161259	24.13481653	29.15703868
am117	SHF	PURSE	1	1	863.4196	1.047676683	1.759617417	5.231815759	13.77425027	-0.162327487	-17.28534538	5.569446492	-1.011816681
am117	MF	STAR	0	0	1030.7874	0.165205541	-1.090732658	0.032645387	6.502375705	0.495914407	-24.28619263	1.820779733	-5.852611622
am117	IP	ARROW	0	1	3022.3742	1.324476928	1.081023766	6.569271467	12.81288201	1.279550425	8.385105308	-3.192214757	3.324369379
am117	IP	MOON	0	0	2920.2137	0.618071453	-0.275057878	-2.682754434	-10.90826711	15.9374153	-2.599136919	-6.168920339	8.150310195
am117	SHF	CEREAL	1	0	1748.935	0.864345436	-2.140690287	25.66509922	32.23950778	21.72132563	-11.08201418	31.42317818	25.88916926
am117	IP	JELLY	0	0	2678.9758	0.891239763	0.751800339	9.336380366	8.129351488	30.3528878	15.46114514	-3.844512298	6.187617665
am117	IP	BRAIN	0	0	3546.2313	0.471736362	0.090255289	15.570349	13.2143736	26.061159	15.29840893	18.55374647	10.47238709
am117	SHP	FAN	1	1	2356.6455	2.578957224	0.880597496	-5.899944765	-1.023552162	-27.36121737	-6.405835092	-0.468636598	-7.250614283
am117	SMF	TOWEL	0	1	1461.7263	-0.046375015	-0.973429345	-0.781534313	5.418128863	1.99133164	-6.834986077	5.133985056	-22.54441146
am117	IF	FLAG	0	0	3338.3053	-0.332499385	2.046620766	-1.962323214	-8.674481891	-0.612662201	-4.900408788	-0.283357864	14.91965302
am117	SMF	CANDLE	0	0	1531.0809	2.289210439	-0.827180427	1.73197969	-5.073488589	18.26875518	18.2554778	-15.39894555	15.54764229
am117	SHP	ROPE	1	0	2165.11	2.024799743	-1.174361667	18.55248776	18.26017565	6.902342803	6.754861549	22.39511962	31.33157785
am117	IF	BADGE	0	0	3272.2011	3.610247107	0.107567817	6.688759272	-2.851672391	14.57394101	16.402672	5.060777281	22.25596709
am117	SHP	MITTEN	1	0	2633.055	1.663297541	0.636345115	-9.463676271	-25.94942766	-15.42857	17.08016738	3.431378824	10.99076987
am117	SHF	CANE	1	1	2559.115	0.313792031	0.023160967	2.224959	-5.531864242	32.20603262	-3.120295124	11.73406728	-8.034953821
am117	SHP	SWORD	1	0	2440.7977	3.902644941	0.517113026	15.8684619	17.12259432	12.27015426	17.89596393	5.865456424	24.83851551
am117	IF	ENVELOPE	0	1	2924.2876	3.05895696	0.134355601	-10.30610325	-21.2856511	-5.704102537	13.83375762	-2.407461585	-6.515651698
am117	MF	LOCKER	0	0	1398.0018	0.567692528	-0.049598772	-9.535603057	0.729622422	-17.3941095	-30.21548683	-1.355972678	-27.79628129
am117	SHF	CAGE	1	1	1655.6166	-1.481911168	2.766420258	-14.77324751	-28.92159961	-10.36860571	0.514739179	-6.687675185	2.5391936
am117	IP	BASKET	0	0	2486.3273	-5.309408815	-0.641345559	6.908759299	7.407603015	4.819614583	10.72935905	9.799952788	2.009831281
am117	SHF	TOAST	1	1	1776.3204	4.912919983	3.775497917	-13.50214531	-24.11280049	-7.605466002	31.80486078	-11.26926624	-17.75835978
am117	SHP	BARREL	1	0	2324.302	-0.466064454	0.77522057	-6.006092294	-8.919820881	-3.443342216	-1.092464882	7.176242932	-16.98596225
am117	SHP	WHIP	1	1	1715.9147	7.044931147	4.972730875	6.844815818	9.639548839	-5.505683238	26.8015124	-8.725785277	14.42468047
am117	SHF	STOOL	1	1	1547.5429	3.400669442	-0.823422067	20.73522162	21.18148876	39.80397359	16.03793687	7.978309988	20.39503078
am117	MP	DEER	0	1	1154.2287	4.820553381	3.627397879	1.443676005	0.90349558	4.393888116	-4.460585807	-2.618174092	8.18606156
am117	SHF	TROPHY	1	1	2502.6924	8.202512074	2.330924549	6.530875547	-0.405847797	38.39593779	22.20164032	0.266110577	-2.661371975
am117	SMP	SYRUP	0	0	3742.5513	-1.577323329	1.551335104	-15.45846022	-5.837188318	22.44586413	-29.51954017	-52.58796679	-24.49597641
am117	SHP	PAINTBRUSH	1	1	1673.778	-1.62635248	-0.595362747	-17.41566342	-26.18813839	2.578680696	-11.23856329	0.809818569	-32.69524878
am117	IP	PAN	0	1	2956.6223	2.692620805	-1.806816302	5.959589019	10.18957686	-52.354092	6.328526247	29.94245266	15.81306313
am117	IF	CAKE	0	0	2757.4107	3.811932659	0.841875853	-11.36663693	-33.29841013	25.42876336	-7.238619773	22.66537151	-20.30660342
am117	SHP	TRACTOR	1	1	1857.2007	1.810458042	3.774419581	36.94884296	54.57449369	29.35417433	20.86206047	3.817193525	39.84523814
am117	IP	PARADE	0	1	2499.078	2.513260255	0.432462102	-2.684113553	3.720193476	3.569857256	-25.58672193	5.852238367	-21.00833167
am117	SHF	POTATO	1	1	1325.7325	3.737068629	2.962991677	-8.890761622	-16.57262029	9.817055384	-22.65085615	15.08395324	-20.84829242
am117	SHF	CANNON	1	0	2648.9724	3.32443007	-0.138059315	7.825291426	8.396156168	13.04151892	-1.870070114	9.241592528	6.097434247
am117	MP	APPLE	0	0	1119.1409	-1.797709817	-1.659978415	-36.6404346	-42.99813464	-21.36757196	-18.24616325	-53.31199568	-24.56397269
am117	IF	BELL	0	0	2597.1331	-1.572506553	0.965331841	-0.889307284	8.40485164	10.74968517	-17.35143576	-36.01740982	11.31341723
am117	IP	TIGER	0	0	2955.5454	1.412927413	2.298202542	13.71727709	23.68302341	-10.39941952	-7.315589176	22.64602359	8.741296245
am117	SHF	TRAY	1	1	1113.4392	-3.05717569	1.069785902	4.93144643	12.72064172	9.895991841	5.536578449	-15.75034229	1.545223109
am117	SHP	SCISSORS	1	1	1583.8637	5.602494928	1.05331287	8.275991223	22.17800882	-39.77820747	-9.689897192	34.26204209	-7.883410694
am117	SHF	LIZARD	1	1	1956.0559	-0.840611942	-3.24819792	-12.49940383	-19.70445308	26.30547091	-15.42987695	-30.42437297	-3.622829025
am117	SHF	BALLOON	1	1	2511.9388	-0.76336298	-1.009557629	4.271313473	-17.31100564	26.70524421	2.13893566	32.6297706	15.50758666
am117	IP	PILLOW	0	1	2426.6531	-1.90066961	0.884360162	9.758582384	8.030630202	41.92418796	14.12555782	-17.28160226	14.74198044
am117	IP	BROOM	0	0	3300.559	2.240560034	0.707628036	11.7376756	25.53447337	18.58932362	2.316512459	-7.535708575	-5.147107285
am117	SHF	PIANO	1	1	1214.4343	0.244401858	3.68805796	7.385788962	17.01415433	12.32395948	-2.155378204	3.891598523	-13.39554295
am117	IF	SPOON	0	0	2108.3372	0.983497172	3.878226179	16.94252269	39.5837599	-15.48809673	-9.716753525	-15.67435074	31.75586174
am117	SHF	HONEY	1	1	1583.0647	3.298798436	4.43307729	6.945084556	26.14969044	-22.16726113	-4.85225682	-18.07385195	11.85162594
am117	IP	ROSE	0	0	2243.7396	-4.698465773	1.266130764	20.63569815	31.45802994	21.54491468	26.92820902	1.865288727	7.084231669
am117	SHF	HAMMER	1	1	2155.4806	-0.717297694	-0.721983065	9.648094194	7.96267822	9.089387046	-3.4787899	21.73454953	9.275591345
am117	SHF	OMELET	1	1	2450.6205	3.527449179	0.520122964	0.690699494	-5.292309532	-11.28372054	1.663241291	6.756527985	19.44955883
am117	SHP	PIE	1	1	1757.3295	6.039281469	2.771738879	22.34596497	19.14336657	28.80099659	12.73156049	23.75087079	29.75189595
am117	SHP	STAPLER	1	0	1890.0879	1.24623749	3.063739673	8.161157857	10.35351099	21.60688298	2.699166254	-10.1353678	13.94685969
am117	SHF	LION	1	1	2468.1176	3.632868156	0.989006146	4.591741846	-0.878777413	31.35554125	12.68743293	-6.514342654	4.986521522
am117	MP	COFFEE	0	0	1997.0595	0.841529422	-1.803966049	-14.49186323	-15.77717479	-13.97152921	-29.4115598	1.000745205	-19.40312512
am117	SHP	CHERRY	1	1	3158.9204	0.617178082	-0.718736274	-0.371198726	-2.260827919	-26.07375467	-20.38901388	25.57079655	9.244390758
am117	IF	NEST	0	0	3122.5167	-2.168300266	-3.248928121	15.12197874	13.43253205	25.77423013	4.105530615	6.46320615	26.54430465
am117	MP	SOUP	0	0	2315.7523	-3.487659923	1.056478606	10.95590029	4.337716191	4.537683925	-13.26987624	40.64853278	16.21534043
am117	MP	BUTTER	0	0	1218.9832	1.037292617	-1.356035244	-7.229647638	-6.60225535	-19.27550429	-14.16501724	-13.71139609	11.57638495
am117	SHF	SOCK	1	1	1322.4231	0.562619078	0.277587001	-2.867932872	-3.555935129	7.415980677	1.063557921	10.11368123	-25.28017404
am117	IP	CANOE	0	1	2749.3429	0.079605134	0.509931956	-9.405667646	-13.42862901	-8.966998972	8.776654542	1.010341344	-20.29139631
am117	SHF	QUILT	1	1	1668.0577	-1.645469123	1.530141951	-10.22100425	-9.074418957	-8.6586369	2.493461972	-17.34686591	-14.22967945
am117	SHP	UMBRELLA	1	1	1372.6961	9.070878426	6.048122045	0.306421245	15.05612683	-5.53870814	-31.446725	-17.05859824	1.721009931
am117	SHF	NEEDLE	1	1	1396.2682	5.335225323	3.836576134	-11.20780422	-14.26245516	-10.17053353	-7.438192538	10.78726966	-29.2761314
am117	SHP	TAXI	1	1	1867.7089	2.455883373	1.944319206	11.26837512	13.91789865	-20.05917774	20.11772562	26.81387203	7.812030365
am117	SMF	SEAL	0	1	2082.3507	1.779978941	3.526031467	-14.04244814	-20.04952966	-18.81767968	-15.58737522	8.084943916	-16.60762513
am117	SHF	WOLF	1	0	1313.776	-0.60707339	-0.241510247	14.78935727	21.18763289	-0.442285283	25.4673085	-5.482202357	25.23296367
am117	SHF	LIME	1	1	1920.0201	1.208209757	-1.02177152	24.16014912	25.32636666	56.8529865	8.966944595	-8.966203006	38.48450003
am117	IP	MAP	0	0	3587.8899	-1.234105207	-0.866622865	-26.25247952	-27.62204547	-38.08732391	-9.987546533	-8.983442313	-40.59439828
am117	IF	HIGHWAY	0	1	2353.3028	0.050426974	-0.507853482	-23.50890068	-19.12749627	-53.04511692	-19.1779173	-23.09748165	-14.45788917
am117	SHF	PENCIL	1	1	1580.4269	0.627085624	4.353842965	5.929558185	-2.590314824	0.531002453	9.538541208	26.25469457	9.618010398
am117	SHF	FENCE	1	1	2361.1446	-1.151563091	0.769619421	8.542571286	5.914970349	33.48596822	-0.029932261	9.877284603	-0.982458949
am117	SHP	DIAMOND	1	1	3467.4332	1.712409316	0.2749518	7.893520793	1.484822414	12.13890279	28.85284777	1.215394369	16.92106822
am117	SHF	RAILROAD	1	1	2591.1373	2.753393917	4.113351743	-2.49034252	-2.219709969	17.46034214	-10.00252634	-11.38193676	-5.566550745
am117	SHP	ELEPHANT	1	1	2081.8401	5.344490279	3.810697103	14.39348436	28.64001482	6.744455876	-1.967836132	-2.679490413	9.563992536
am117	SMP	CHICKEN	0	0	2735.6567	-4.482859835	0.343179834	-5.470214518	-27.41080154	12.38660417	14.98567809	18.75805423	1.963871343
am117	SHF	ANCHOR	1	1	2555.0371	2.01256039	1.10417242	-9.145598402	-3.531662349	-39.11176963	-0.216135134	-0.892306142	-13.99462525
am117	SHP	HOOK	1	0	2584.6963	7.054421016	3.044924469	19.55650638	31.71525211	-16.83165287	13.19225575	4.654331862	35.47880244
am117	SHF	CAMERA	1	1	3178.9235	2.193697911	4.463525795	20.94631508	35.57286276	21.84309464	11.31500909	-17.48119072	27.04293324
am117	SHP	SOAP	1	1	1873.4059	2.75703229	1.96208779	-3.507904578	2.107293641	-17.48439913	4.168823664	-18.45875949	4.098391788
am117	IP	WINE	0	1	3069.7146	-0.295820707	1.092944486	22.45626624	37.58352537	9.383829097	11.91312408	-6.379803079	28.78372724
am117	SHP	CASTLE	1	1	1958.7538	2.900694219	5.16984404	-2.960196771	-4.013957188	21.99839561	10.5860825	-10.06073384	-20.35253564
am117	SHF	PAIL	1	1	1583.461	2.904619236	3.083234416	1.19281713	-0.735290434	-10.6579085	-8.798903018	16.12310081	5.757421526
am117	IP	CROWN	0	0	2218.5128	-1.020676011	-0.225036756	-5.211130046	-8.01858182	-7.484078729	-15.28219634	-4.977787871	9.64947916
am117	SHF	OYSTER	1	1	2645.0501	3.991263354	0.396782207	-6.687301116	-16.30296806	-0.979070123	-11.51672912	22.7917387	-13.89168059
am117	SHP	BACON	1	1	2074.9844	3.323502964	3.42526528	24.43872623	26.27758114	39.48874311	22.46987607	15.54370858	17.93470545
am117	SHP	GOAT	1	1	2692.895	4.390094651	2.721289691	11.93100448	25.18879976	7.637799154	-4.50267156	-12.83686938	15.26648867
am117	MF	DESK	0	0	3228.953	-0.174648956	1.293340413	-0.002916586	2.981484018	0.877629886	2.440285268	-3.13691516	-6.813641557
am117	SHF	SHOVEL	1	1	1769.56	3.195718194	1.799538266	-17.80292006	-30.72843715	2.453488654	-14.42325573	7.238317936	-27.74538999
am117	SHF	TRUMPET	1	0	1420.5683	0.708523175	0.051193787	-6.229844164	-5.797433076	-2.7440934	1.646020387	-12.00379741	-8.547236247
am117	SHP	TOILET	1	1	2194.4536	-0.270225861	3.267192059	-1.79307845	-10.37998126	-7.262654714	-3.955933762	17.04097983	6.991486684
am117	IF	BIBLE	0	0	3164.705	-1.70676703	1.820659481	21.51536472	27.88694581	15.18492918	-16.73375335	15.02193449	38.04785889
am117	IF	KETTLE	0	0	2528.4145	1.126781182	-0.455488005	-9.111263153	-11.23241561	5.060548456	1.487228192	-1.651222673	-28.72056067
am117	IP	MAGNET	0	0	2709.7422	-1.60809761	-2.696803497	-20.46690704	-44.82203971	-3.764639779	0.03822014	-5.713460409	4.417172045
am117	SHF	CRAB	1	1	1666.0973	3.484857448	3.435777447	-2.453099541	-4.239239965	3.104976397	19.13766574	7.32982175	-24.74392242
am118	SHF	WINE	1	0	2898.014	2.676900857	2.45234543	10.5216444	5.835123505	6.408331042	1.152099344	36.67816024	7.101032769
am118	SHF	BROOM	1	0	1886.8685	1.894103311	2.625181397	8.568217414	10.44455644	15.0590101	-14.50045971	9.871130995	8.504381598
am118	IP	HAMMER	0	0	2776.8955	2.196793823	-2.104588093	1.239386714	-1.055154762	12.83543131	17.97700274	3.581873304	-12.16824178
am118	SMP	BARREL	0	0	2469.5893	1.91703713	2.109520953	7.588952793	8.501620482	-21.47942954	-24.95848459	16.31934566	37.32509506
am118	SHF	TIRE	1	0	2848.1903	-2.292632319	-2.248168012	14.34414266	16.47467507	20.04824557	32.78570835	14.95885165	-11.34677247
am118	SHP	ANCHOR	1	1	2289.7419	6.179693718	2.993901256	34.00113175	46.18900864	16.15518005	6.560518368	20.47730903	32.3310215
am118	SHF	PAIL	1	0	2947.367	2.736998628	-2.027990624	-4.334752678	-5.082214656	2.19363199	5.758171466	-12.60985995	-2.855337797
am118	SHF	ELEPHANT	1	0	3181.6135	-2.133073996	0.405208411	19.26780563	23.4842306	13.28529153	5.075806457	2.889259353	35.72420325
am118	SMP	CIGAR	0	1	2955.8732	1.95218319	1.857089777	12.41425991	25.49504837	11.19330198	-22.52623874	-6.902808565	5.317394882
am118	MP	SOCK	0	0	1439.0321	-4.784216749	-3.16690467	-5.406515278	-15.73004478	-8.121004277	29.51271274	-5.765973744	17.56885241
am118	SMP	LIME	0	1	2214.6601	0.881380682	3.892959757	9.646276507	10.39548495	16.32306299	15.3032217	13.53167415	-7.135619842
am118	SMF	MOUSE	0	0	2613.7832	-7.026099201	1.205967912	2.960619836	-1.723563458	24.11739449	11.34359096	-4.80968434	9.105616232
am118	MF	CARROT	0	0	1511.0797	6.443335643	1.02853296	0.408725464	3.273262109	-30.6365479	13.83875091	14.37266261	-11.474157
am118	MP	DOLL	0	1	1846.9353	-0.371500516	0.369210641	1.093071954	2.646624899	-15.80367001	7.605417376	11.5881326	-8.37469975
am118	MP	GLASSES	0	0	2654.2473	4.139304141	-2.013566046	17.66894751	12.97759259	20.77668753	29.44947014	30.45477118	11.38310287
am118	MF	CAKE	0	0	1700.9784	4.124314761	0.501030822	-11.43143207	-21.8149631	-5.028540074	23.01750039	9.071205826	-20.72660226
am118	SMF	HAM	0	0	2201.1793	-0.839951341	-1.561946239	2.235054157	2.658994223	1.803833445	11.80635141	-0.900196486	-1.343262949
am118	SHF	KEG	1	0	1553.347	4.41798653	0.499274302	13.97762404	9.098191619	30.29208911	10.03543328	9.228053656	28.92585265
am118	MP	SHOWER	0	0	1276.9541	-3.122938826	-0.430345163	-11.99327626	-17.05282345	3.259743597	-35.94149126	-4.553994019	2.283560426
am118	SHF	BRAIN	1	0	1883.1781	-0.28371876	3.003310465	8.863603244	22.27227632	15.11927573	13.14596934	-25.7988143	-11.61311844
am118	SHP	DUCK	1	1	1900.3302	3.613224308	2.338873115	-7.559737257	-9.145545856	35.11942487	-6.480013255	-18.08383867	-23.67740241
am118	SHF	TURTLE	1	1	1663.2243	0.908697584	4.542736986	10.79854999	20.93354309	5.004226853	0.159560164	-3.865697181	-1.44042246
am118	MP	CHERRY	0	0	2367.885	-4.383499905	0.013944786	-7.59170002	-4.275203349	-19.72846789	-12.86472766	-2.871870788	-13.72075092
am118	SHP	FLASK	1	1	2477.8755	0.581469649	-1.376530385	-7.626024099	-14.11553758	-0.428317231	8.543048855	-9.063770387	4.674248439
am118	SMP	PILLOW	0	0	2635.21	-2.348377692	-1.871628552	-12.65533594	-9.882930468	-23.20739964	-1.759304224	-27.85728765	-3.754061165
am118	MF	JACKET	0	0	2852.9939	-0.116086784	0.868099047	-10.11158262	-13.34157653	-10.68441285	-0.511584851	-18.70063241	8.000548846
am118	SHF	GOAT	1	1	2164.5166	-3.069146509	3.899493917	0.01320173	-1.226022044	9.350668657	-13.87692222	7.039303047	-2.34433115
am118	SMF	TOWEL	0	0	2617.4078	-1.600218636	0.626624475	24.25671015	19.87274549	26.41904919	24.35360203	45.7289144	14.24665924
am118	SMP	WOLF	0	1	3078.1096	0.014968749	0.836088632	18.81327871	8.55190217	40.53211385	33.58338469	17.92024541	34.94782729
am118	SMF	KETTLE	0	0	2224.9161	-0.103201554	-0.828155978	14.07929747	15.09981639	40.7922714	15.55214178	-0.761180217	5.296028897
am118	IP	FAN	0	0	3279.3774	-1.665172961	-0.961228838	-3.939925915	-3.418255723	-11.39014057	-3.233443651	-10.85345561	7.959529716
am118	SHP	MAP	1	1	2558.4818	4.769863365	5.402341318	-2.665550211	-11.56704257	3.749878818	11.23463868	-2.624424013	19.76852581
am118	SHF	KITTEN	1	0	2406.2026	7.683211721	1.120262153	-11.20343139	-13.9895441	-4.119732173	-12.67625116	-10.61418761	-5.357956766
am118	SHP	FENCE	1	0	2176.0179	4.249329077	4.001974962	-11.80385518	-15.6239799	-29.22076811	-19.10090444	3.754759818	3.654750593
am118	SHF	SYRUP	1	0	1809.1479	3.696840916	2.49644797	14.48203418	10.96639512	24.87068523	15.50880332	12.55966031	22.11066568
am118	SHP	LION	1	1	2282.3812	2.429848994	3.123257183	14.33689409	18.60173913	7.280016726	25.25403923	-0.780086661	14.16798835
am118	SHF	WALLET	1	0	2060.0416	-1.63402461	-0.359550837	31.40067137	56.24084175	21.00874206	-11.36230358	-19.45450227	26.93249969
am118	SHF	MUG	1	0	2243.5528	4.619101299	5.785079878	-1.284874626	-1.686745691	5.290988639	6.389266585	-4.516457691	-5.878088714
am118	SHF	PARADE	1	0	1888.8856	3.844495498	-0.321969479	14.98488198	15.12736368	29.11244278	35.66988186	1.226408299	6.659076955
am118	SHP	LAMP	1	0	2042.8011	2.039966712	5.575562905	4.281908964	1.266843038	16.40555219	-2.300424495	13.21986627	0.009676269
am118	IF	PENCIL	0	0	2529.0602	-3.867012744	2.28255316	1.699479662	1.669679026	9.736461856	-5.937373289	-1.004183455	3.365462637
am118	SHP	HIGHWAY	1	1	2678.339	2.933484026	1.429298623	-2.574519213	6.577137165	-32.96152725	-28.17619014	12.93942828	-18.10469856
am118	SMP	CAGE	0	0	2774.9722	2.022967691	1.32520274	31.73048141	37.86080856	52.68866925	4.116965324	32.61070185	5.847363084
am118	SHF	BACON	1	1	1847.2677	4.096223227	-0.038788148	13.53141555	14.35312604	3.380074488	22.19771958	15.92029034	10.08183186
am118	MP	APPLE	0	0	3242.4678	2.259540056	0.4201243	3.975962541	7.785939972	-0.087383615	-5.881541247	7.328872804	-6.20206724
am118	SHF	BIBLE	1	0	1674.3298	4.447434973	3.8778237	13.23009207	21.12796064	15.34716837	26.52290942	8.002010447	-22.80306308
am118	SHP	SPONGE	1	1	2264.7266	-1.56614028	1.306280466	3.472726022	12.50278832	12.28611628	-36.65164757	1.829119418	-13.46648617
am118	IP	MILK	0	1	2866.3151	2.060113146	1.359524857	-3.171859448	-12.29749949	7.603094934	17.45725591	19.45657956	-15.08391787
am118	SHF	HONEY	1	0	1914.7831	-2.386164268	-0.372783019	4.72555598	11.89535622	5.403316401	-26.2769625	-2.217746829	2.744805335
am118	SHP	OTTER	1	1	2389.7184	3.247883203	0.674389357	23.65820868	32.30353692	28.07824548	25.68771932	-5.967014952	19.45613565
am118	SHF	TOILET	1	1	1509.7256	5.518775811	2.944233071	-7.101163411	-7.930362737	-3.951232103	-6.415275494	-0.20986669	-15.08888473
am118	SHF	UMBRELLA	1	1	2354.0622	4.721926881	0.394603942	19.32982587	13.87601491	32.66568799	25.59428507	17.66628667	28.88874932
am118	SHF	NEEDLE	1	0	2006.0862	-2.065316595	0.944032051	10.84791895	23.56842469	8.29829273	-7.131589341	-15.21747594	3.870328924
am118	SHP	ENVELOPE	1	1	2667.7643	7.292010603	3.08856193	-1.604778045	2.165846764	3.632474139	-40.58053639	8.447906738	-9.062425045
am118	SHF	STAR	1	0	2324.6747	3.907704312	2.089921262	16.91225182	31.8700634	7.109505178	-0.962737809	-15.79893293	14.70367857
am118	SMF	BASKET	0	0	2736.384	-0.162955062	-0.076627855	-3.974983349	-9.649665748	-14.66732605	16.82938321	18.43472233	-12.38234144
am118	MF	ORANGE	0	0	3213.0603	-1.313760432	0.991738641	7.495947413	2.867992927	28.27298607	0.94063267	7.093349464	14.13284107
am118	SHP	CLOCK	1	1	2565.5815	6.335991537	0.989633554	14.43675351	22.15862961	21.35023097	-2.041697296	2.724044618	1.805622483
am118	SHP	HOSE	1	0	3319.2427	-1.199292809	2.724359484	-1.96173998	-16.14485278	10.84366706	17.98417025	0.18186189	30.53400882
am118	SHF	ROSE	1	1	3047.6389	0.050384781	0.277118818	34.01570708	37.41182946	25.04711915	50.91092238	19.13012564	34.92324942
am118	MP	BONE	0	0	2387.3573	0.505971465	-0.103851771	2.682279176	-2.607990884	8.898969784	5.37099467	15.40480712	2.103110465
am118	IF	STOOL	0	0	3377.5574	2.380302472	0.484531186	7.407749191	3.797314145	20.59270293	20.54123453	8.332564955	2.081246668
am118	SHP	OMELET	1	1	2045.3961	0.993359173	0.893406153	-12.91011448	-7.429416856	-29.05359813	-10.98375811	-9.434889429	-27.64180255
am118	SHP	CAPE	1	0	2023.8987	6.547661451	3.993834548	13.70818363	23.70164299	8.154899738	-20.45139321	-4.998734775	21.54120831
am118	SHF	SOAP	1	1	2131.3634	0.990980157	0.172756551	25.92176513	36.19379929	16.17044538	15.42382946	11.56547172	15.8793263
am118	SHF	BALLOON	1	0	1636.4282	9.62007362	4.778650258	4.791894462	12.74710633	-3.168665811	-9.68996702	-7.798358321	3.126835776
am118	SHP	STRING	1	0	1718.7973	5.027806653	5.089275343	13.9213134	7.083009449	34.83598911	24.55512041	13.93156254	18.19756188
am118	SHF	PAN	1	0	2331.965	1.264977069	1.787320729	4.753879028	9.641593327	-7.477302125	19.17522471	9.541159035	-20.17767981
am118	SHF	PHONE	1	0	1881.5252	1.21095608	-0.093880544	-16.0909821	-11.48564595	-29.47173475	-15.54596429	-11.51173384	-29.96483389
am118	SHF	LADDER	1	0	2324.8893	1.125080034	2.605398235	2.60410552	-7.060833915	7.100513604	2.798040289	21.88454456	14.91594683
am118	SHP	MITTEN	1	0	1451.2782	3.694306591	-1.127711049	7.884062055	18.20955466	-0.699561638	10.20294026	-31.28368636	18.82148655
am118	SHP	LOCKER	1	1	2571.562	5.29826739	3.14765905	23.46098563	26.13383601	19.12603756	20.47670257	21.0462871	20.86206426
am118	MF	BELL	0	0	3024.4634	1.310436151	-0.72351153	9.095053948	11.75183119	29.47548771	17.37637919	-10.95107062	0.829397235
am118	SHP	MUSTARD	1	1	2337.1287	0.387786796	1.62502745	0.544393965	-3.026962422	-10.41693182	23.89708612	-5.104536088	16.29578415
am118	SHF	BOWL	1	0	2663.5294	2.03347928	0.102554043	5.711928368	7.380325229	12.458307	11.49278033	0.009826272	-3.298166816
am118	SHF	CRAB	1	1	1909.0964	1.803454571	0.439951752	-2.459511394	0.157791554	-15.21392433	10.12869435	-17.18826125	7.230771274
am118	SHP	DIAMOND	1	1	1902.5827	1.676534896	0.057248185	11.87373125	15.48499454	4.620792216	-5.977293235	17.43202311	7.44034167
am118	SHF	PAINTBRUSH	1	0	1972.5464	3.164932555	1.892445292	5.364764991	-3.787731871	17.00062028	13.61316184	14.27785861	17.32815798
am118	SHP	FORK	1	0	3556.5788	2.898853368	0.961313319	-8.767992135	-4.610337307	-35.45595755	-2.751925125	-12.33357776	-3.500626752
am118	SHP	SOUP	1	0	3557.422	1.304858017	2.536728219	0.621853845	-4.203771871	-11.29855343	-8.545783232	5.905509555	29.40183678
am118	SHF	TRUMPET	1	1	2859.3749	1.129722842	2.313977627	-6.971396168	-3.767899035	-3.80143224	-37.54236252	-9.743927284	-0.093543759
am118	SHP	LIZARD	1	0	2645.4138	-0.25945064	2.903614441	15.88802825	20.515461	19.57993789	10.82891136	7.843248429	6.910384036
am118	SHP	CANNON	1	1	2280.9603	2.379756757	2.72360666	23.24185358	29.00734893	21.4332033	10.49717965	9.221402558	26.18182357
am118	SHF	GUITAR	1	0	1428.898	2.695138512	4.511714024	7.69683551	3.352889497	9.394854466	20.25456025	5.5983589	18.76347604
am118	SHP	OYSTER	1	1	2508.2913	2.398020548	-2.053989475	18.5926767	17.79190661	40.6476318	12.01348204	6.540257891	22.71810959
am118	SHF	NAPKIN	1	0	2292.75	4.424218914	4.265169042	8.113248795	13.51524615	3.601392191	10.14768893	-11.14214708	11.83261191
am118	SHF	NET	1	1	2771.961	-0.231468261	-1.781992563	24.04100921	37.09267703	9.07327184	-20.53949783	20.57132569	15.01847589
am118	SHF	JELLY	1	1	2430.6345	7.651883704	4.27453135	7.822706462	10.76103088	-14.73454113	-3.216210411	26.69608195	-1.881882533
am118	SHP	MONKEY	1	0	1577.8849	1.640887159	0.283581704	27.17845461	23.8394912	16.12610819	17.51051444	54.0011906	23.26684728
am118	SMF	MUFFIN	0	0	3275.8446	5.228623867	3.532980536	-0.836271969	-10.66953042	12.33316998	12.50410737	16.89062055	-1.258937048
am118	SHP	TROPHY	1	1	2538.1614	3.41877005	2.606494268	17.36857086	25.48877455	-16.30544149	0.832720383	37.41452554	-2.472570577
am118	SHF	RAILROAD	1	1	1786.751	4.099524836	-0.442974411	5.337430984	5.522875457	10.91983014	15.79616873	6.760846288	-8.264898887
am118	SHF	ROCKET	1	0	1377.5875	2.979376464	2.396261075	-2.272158495	-2.987987381	-10.64487662	3.423800276	-10.03890044	13.34876305
am118	SHF	POTATO	1	0	1809.3218	3.482714698	0.378223929	15.49149123	9.791622256	14.00492995	-16.22777489	45.30642755	23.66153236
am118	SHP	CORN	1	1	3349.9051	5.262564462	2.258789589	5.312470183	12.13129893	13.76333627	-29.74736975	-7.015000366	7.541752313
am118	MP	DRUM	0	0	3842.9603	1.414065188	0.140197026	-0.093520486	-2.858395569	0.050603085	22.51480041	16.86827237	-23.7334771
am118	SHP	MAGNET	1	1	1303.9977	-0.829498658	0.902102083	-0.504814038	-6.269540372	11.16474605	-3.608396151	5.158430595	8.648150603
am118	SHF	TAXI	1	1	1856.5044	2.578886543	1.530950545	-19.973066	-9.318602225	-18.6561474	-48.97766927	-25.56693542	-39.63370914
am118	MF	MOTH	0	0	2599.3576	3.122808228	0.788127219	-10.92013423	-2.535352496	-28.43372016	-15.21053562	-0.522137672	-40.94494961
am118	SHP	OVEN	1	1	3400.5908	5.726810067	0.610767651	13.59992022	26.80940528	-7.7470275	-0.056177999	-10.70898809	15.06863308
am118	SHP	CASTLE	1	1	1960.0519	3.443461158	4.806876085	2.495687353	17.63234319	16.51719098	8.868563312	-49.2665405	-11.87598195
am118	SHF	TRACTOR	1	0	2271.3246	4.931773005	2.975591954	-2.760968736	3.730037627	-9.431313738	-13.14292674	-16.08584553	-1.163456174
am118	MF	FLAG	0	0	3704.5756	1.450732021	-0.12758791	2.067686585	-0.095834365	2.73696466	30.18989516	-6.777018849	3.484622423
am118	SHP	BADGE	1	1	2578.4935	5.419965793	-3.088249566	-18.59262732	-21.77290231	26.83686905	-22.49712317	-38.10694564	-16.35154034
am118	SHP	PIGEON	1	1	1689.4808	-1.798889774	3.881662861	0.436191652	5.102098209	-16.47474593	26.14195599	14.12367988	-37.69600043
am118	MF	SEAL	0	0	2419.654	1.745516291	-0.601811477	-0.323452615	-6.558284497	26.3286493	21.28512913	-11.11609972	3.06934589
am118	SHF	PURSE	1	0	2253.2322	8.639785872	5.425742253	0.19119656	-4.648600504	-7.63773137	5.31992677	4.685621021	17.68265776
am118	SHP	STAPLER	1	1	2251.2742	-1.479658653	0.649241364	4.942792588	11.1124839	-10.4899504	3.176496749	0.627029845	-1.3867755
am118	SMF	BANANA	0	0	3275.8228	-1.810232118	1.8503381	-8.372967399	-10.2229854	-13.62862909	-9.004281535	-6.295462236	1.345033505
am118	IF	HOOK	0	0	2568.2035	-2.438526447	-0.543100682	25.30856665	19.462818	21.70595738	36.86989613	42.673443	23.77427199
am118	SHP	BOOT	1	0	1948.3734	9.148152663	3.334860454	4.608802874	4.762977613	16.19191943	-5.575267175	-1.003907819	7.775266075
am118	SMP	CANDLE	0	1	3040.2085	2.80235403	0.775474709	21.10742838	7.854372902	31.61765381	24.99102388	30.290886	53.18235506
am121	SHF	ENVELOPE	1	1	3773.8381	0.031267766	-1.736274306	6.260242029	9.858992512	1.105844717	3.933876447	8.61747949	-0.206008103
am121	SHP	PARADE	1	0	2498.8153	2.920009424	2.705950278	15.56251888	26.81195816	2.713109503	9.118048288	7.741148554	6.535753638
am121	SMP	HOSE	0	0	4181.978	0.13900558	0.293527598	1.15898436	4.262562507	5.185738372	18.63122313	-12.97593477	-6.739412306
am121	SHP	PENCIL	1	0	1688.7078	2.141537085	-4.269688084	4.802316117	13.95496473	-4.932868759	-3.416623493	-12.90709026	9.273995219
am121	SHF	ELEPHANT	1	1	3456.6361	-2.767861568	-1.878215514	16.29247945	16.65530461	29.62867687	-21.87425062	35.26966346	3.787670407
am121	SMP	ROSE	0	1	2146.696	-1.151038422	0.027394398	24.32247444	29.20880155	21.48808032	1.115751409	19.26680483	29.83383491
am121	MF	OTTER	0	0	2330.7484	-2.567786957	1.641155229	1.856716038	-8.030551701	26.46186381	8.631607647	3.315184823	1.874027604
am121	SHF	HAMMER	1	1	2445.5098	-1.763560996	0.388339582	-4.052196533	-19.58588632	9.220244382	19.17657947	4.396345546	7.594017026
am121	SMP	MUSTARD	0	1	3280.765	-4.3331168	-0.962013515	-6.35176523	-11.88138227	8.566725143	-21.50645172	-2.308368149	-0.881559498
am121	MP	POTATO	0	1	1895.4912	2.92343926	0.810283847	-4.6007711	-11.75771496	6.502876174	12.18734709	-0.583773006	-7.181775506
am121	SHF	DEER	1	1	3484.6923	1.26509637	3.330415026	9.956283154	17.49165391	-9.95604759	13.8256449	7.315708142	7.904726742
am121	SMP	MITTEN	0	0	3425.527	4.327194491	2.154196756	3.904450132	1.967611371	10.22990337	-9.515987	9.495241701	4.886161216
am121	SHF	DOLL	1	0	2397.0227	5.38855515	2.59469831	2.804302477	5.287852063	-17.86378073	7.771434989	7.901394503	7.807963668
am121	SMP	TROPHY	0	0	3787.9678	-2.679986591	-0.56086444	21.16068499	18.72505932	20.55310995	27.16817328	12.7129832	33.77466826
am121	MF	APPLE	0	0	3873.4997	2.249194056	0.528534931	6.967315315	10.404494	11.67242521	2.618166089	5.753923069	-3.874896136
am121	MF	DUCK	0	0	2091.9884	2.246425827	-1.303003375	28.65588351	38.3826969	22.57212092	23.83054722	23.68580563	13.98186151
am121	SHF	BASKET	1	0	2919.5934	4.615634128	1.768928977	-13.10373668	-14.11217397	-17.79160208	-5.977603489	-22.02040635	-0.813408388
am121	SMP	TOAST	0	0	3403.7468	1.999706372	1.779575228	13.10069872	19.11859981	8.658576161	-6.890128268	5.932498019	17.31062596
am121	SHF	CANDLE	1	0	3320.3567	-0.974963615	1.036910934	13.24119538	3.707818832	25.22852515	25.47965228	15.07825143	21.02534218
am121	SHP	TRAY	1	0	2569.0083	0.708094127	4.615028294	19.48156541	32.85838119	25.54730343	0.263821314	-1.026984202	5.308195239
am121	SHF	LIZARD	1	1	1478.5735	-0.617887737	0.22206871	-0.180710709	-4.071001415	-1.872328414	13.28993049	18.80439037	-12.7499197
am121	SMP	CRADLE	0	0	3529.5365	-4.327420824	-1.359938126	-7.199788409	-17.33704642	0.342979892	15.17972308	-7.731900851	3.618273815
am121	SMP	PAINTBRUSH	0	0	4723.0838	0.830753722	1.619168004	10.12297095	12.81629674	15.94775386	2.005775434	16.22572031	-4.812289627
am121	SHF	SPOON	1	0	2162.7697	5.099400279	-1.765454535	1.922714853	7.989887815	-7.404158123	19.13316716	5.234695634	-18.53183857
am121	SHF	JELLY	1	0	3071.948	2.501848415	-2.328920313	5.495333961	-0.8421853	16.57094969	-18.76818751	17.22539152	14.11774553
am121	SMP	STAR	0	0	2042.8038	-4.076865419	-0.181857681	-2.866560466	2.433975179	-3.568483319	-0.649583454	-13.25340781	-8.382229562
am121	MP	HONEY	0	0	2354.6416	-7.980410911	0.045553746	3.452792218	8.755431583	-8.706983303	0.624745884	-10.39152011	14.68834583
am121	SHP	QUILT	1	0	2552.927	4.087178389	3.974576668	1.108954031	1.197785947	6.541632599	-15.25080398	-0.420803647	5.55612862
am121	SHF	BELL	1	0	2218.2085	4.541263688	4.725008869	14.79615859	22.95582478	5.474466611	18.07493777	7.095351187	6.148592252
am121	IF	DOLLAR	0	0	4320.1859	-0.005348992	0.420548931	-3.395578568	-15.71308539	7.989798698	-1.153180252	10.54957428	6.279939274
am121	SHF	CANOE	1	1	2310.2464	5.478653266	1.869253703	12.88690699	8.637003459	11.70314309	19.53165118	23.96683433	11.99609912
am121	SHP	MILK	1	0	3681.713	-0.441216838	-1.110330777	11.38312867	16.74873445	3.950141478	36.83193858	-4.945998714	5.927470455
am121	IP	PURSE	0	0	4083.5189	-1.95156933	-2.148192567	-0.815283979	-0.256667183	-9.212176297	6.572551192	3.046576269	-1.975738152
am121	SHF	MONKEY	1	1	3903.5329	0.422570094	0.230147788	0.588052499	-6.24672333	18.60232835	6.764973302	5.378777517	-4.773040288
am121	IP	COUCH	0	1	4825.7659	5.441625242	4.14425858	4.35126487	9.874087404	1.007269056	-5.780362115	11.65974725	-10.10873874
am121	SHF	PIE	1	1	3016.069	-5.609343819	-1.908937057	11.93146979	22.52170365	16.44647874	-3.646588247	6.849281289	-9.622481809
am121	MF	BADGE	0	0	2119.851	-3.394135967	1.184209923	-11.59821894	-14.93875798	-5.239628198	-14.65321508	-8.168614654	-9.855024733
am121	MF	SEAL	0	0	3520.3831	-0.941657517	3.15474365	-5.476980235	-16.76948703	-4.025252974	23.33935044	4.196147264	1.230200406
am121	SHP	ARROW	1	0	3120.1131	9.72634461	3.071721508	17.56804305	15.69722695	24.63485598	-0.561099694	33.13060957	10.4195907
am121	SHP	SPONGE	1	0	4702.6311	4.83080565	0.848786401	-8.448607573	-15.52486363	7.150107097	-15.42491561	-3.833871725	-3.947891277
am121	SHF	SOAP	1	0	1598.2287	3.316787598	2.9576423	11.20918095	15.00330239	8.474420906	18.38374098	15.94895206	-5.26016297
am121	MF	CAMERA	0	0	3862.5815	-3.996793447	-0.838212551	0.700412535	-3.220839092	5.597532681	-19.99615078	9.967280871	8.845039357
am121	SHF	CAGE	1	0	2583.3036	-1.159548177	1.203891195	-1.263452317	-2.347424943	2.981576488	-1.317790175	-2.379407591	-1.08348253
am121	SHF	UMBRELLA	1	0	1645.5667	-0.26068839	-2.064303577	-8.882615712	-3.249379997	-6.076329381	-20.87579414	-12.15930495	-18.28207158
am121	IP	BRAIN	0	0	4011.851	3.399786968	-1.357228537	-15.29465141	-3.266235072	-20.2577373	-38.61998407	-31.05095791	-17.69741984
am121	SHF	KEG	1	1	2349.0573	6.354912548	1.501315271	13.05406787	7.860315624	15.20557082	36.59432247	15.05439667	11.84929725
am121	SHF	RAILROAD	1	1	2106.5296	4.318229221	3.509991243	22.94742197	5.036104893	24.50970926	13.04667561	51.63952691	49.77985476
am121	SHP	TOILET	1	0	3089.6589	1.228980055	-0.526228518	23.05471971	22.5328389	8.426022363	9.584403113	22.63967389	45.65769142
am121	SHP	PLATE	1	0	2500.6657	-2.023220536	0.115436933	4.283782669	-8.027333612	25.51867801	-3.217577918	-3.586751599	30.70897906
am121	IF	ROPE	0	0	4291.2588	-5.094834735	-1.370172353	-37.9851144	-59.7203046	-47.32868753	-12.87678283	-15.39124675	-1.935496009
am121	SHP	CHEESE	1	1	1783.5267	-0.817539214	-0.033617692	15.02993906	20.78751503	8.314802236	18.88326637	19.59940686	-1.40546327
am121	SHF	STAPLER	1	1	2170.3422	-1.277232703	-2.250107188	5.318003653	19.59062712	-0.528905034	-31.7754395	-8.053806795	2.086880439
am121	SHP	SHEEP	1	0	2441.9942	-0.391048179	2.63587428	6.133140494	10.04096111	-14.51003395	30.12186154	6.754558398	1.669348031
am121	SHF	STRING	1	0	3379.6047	1.635264824	1.385055344	3.566855999	4.121228483	6.685392131	9.419835585	-4.533016739	3.88468642
am121	SHF	MUG	1	1	2326.8287	-3.511521155	-1.12479292	-0.370877586	-14.34414169	24.04778329	-1.442181537	1.559419105	15.01093307
am121	SHF	CHERRY	1	0	1289.96	-3.011778966	0.141123957	-5.201946601	-7.352711709	15.04409846	-31.70037822	-2.568448522	-7.23303904
am121	SHP	TAXI	1	0	3454.0005	4.050673251	3.208445725	-1.63882591	-3.321283562	-2.236657462	6.413530385	-5.094400623	2.947050756
am121	SHF	RABBIT	1	0	3362.3592	4.139216885	3.894107165	7.223222786	-4.186754488	16.24255277	0.471033794	28.05077368	14.48880094
am121	SHF	SCISSORS	1	0	1590.4472	6.142880708	3.646169681	-1.597780317	-0.555817452	-10.56689469	9.637390402	10.75865398	-13.77666072
am121	SHP	DESK	1	0	1884.5273	1.263196145	1.030032569	-3.007286687	-1.19449367	-4.958389975	-9.679170093	4.268714184	-9.955018666
am121	SMP	TRACTOR	0	0	4256.4729	-1.194864711	0.067570874	8.038377995	7.371149771	4.634894422	0.407894435	19.86108609	5.618036398
am121	SHF	KETTLE	1	0	1901.685	-1.717198203	-0.611243066	-6.15931838	1.211428665	-17.94358316	-12.25460174	-20.64022495	1.116489371
am121	SHF	MUFFIN	1	0	1381.3068	1.787319535	1.359565509	14.16623918	24.28760981	21.68874332	3.473021905	-5.654962604	2.866360996
am121	SHP	NET	1	0	1443.0931	-1.79365897	-4.041046569	4.77154433	-7.03075318	23.84252029	12.76916711	4.423867689	16.59852248
am121	SHF	BUTTER	1	0	1548.2121	3.249643325	1.349996684	6.133512462	15.43746677	15.26237255	-15.33072839	-17.56492035	4.895827502
am121	SHF	LADDER	1	0	1459.0852	2.934648241	2.086790532	7.048017984	3.905582908	11.12462436	11.95894311	0.495878955	15.97171503
am121	SHP	MOUSE	1	1	3156.8983	0.731833645	-3.17671045	26.45682268	35.12365453	21.38318288	6.597883	3.425276419	38.9989368
am121	SHP	FAN	1	0	2691.736	2.559940735	3.957381419	19.07830968	17.89813469	44.73868644	13.22991362	6.758221605	13.0795654
am121	SMP	NAPKIN	0	0	3274.8361	2.437680312	2.237543952	4.756631305	2.089105676	24.01775758	9.486641624	-1.538675907	-2.187438414
am121	SHF	KITTEN	1	0	2399.9895	5.882616444	3.655697921	10.03400723	-0.413581916	21.96059594	7.094198548	30.7808723	9.940041552
am121	SHF	HIGHWAY	1	0	2880.7601	-3.284060215	-3.244405781	12.95842681	16.80606661	8.080430643	11.59170192	25.91128269	-5.218356494
am121	SHF	ANCHOR	1	1	1848.9293	-2.383183694	2.8527019	-0.476529814	5.509080399	-35.15451921	-5.521348686	4.33076033	13.19752308
am121	SHP	CAPE	1	0	2036.646	-1.403906941	-1.363216325	0.683763053	11.76107134	-36.06827458	-1.507793312	11.91335462	-5.851649945
am121	SHP	TIGER	1	0	2077.572	-0.424763675	0.67329757	-1.527430398	-5.806201101	-7.808334575	0.333343465	9.937649606	4.555483688
am121	SHF	SOCK	1	1	3095.1603	2.595410489	-1.967699595	22.34591277	24.14520337	46.73168802	12.53177714	16.09505528	5.222153051
am121	MP	CANE	0	0	4403.9597	-0.570682611	-1.604870323	-15.94824805	-14.99095296	-36.7589414	-3.792901333	-10.28359047	-10.68451777
am121	SHF	CASTLE	1	0	3382.0389	-1.526977043	-1.399448291	14.07101811	24.83859871	-1.213394684	0.655219041	3.223099333	15.20846514
am121	SHP	BENCH	1	0	1128.4054	2.050976003	4.054649318	-2.599392564	-1.934368273	9.528105449	-13.87130606	-3.751098189	-9.089033391
am121	SHP	TIRE	1	0	1317.0318	-1.512275768	-2.095030732	3.526524998	-5.214479718	11.53867615	9.293761808	8.634411181	12.95504766
am121	SHF	GOAT	1	0	3362.8072	4.019313441	1.811980899	5.611283602	8.512666041	-16.24432401	-5.313560245	15.95873027	13.58759416
am121	SHP	HOOK	1	0	1418.0359	-1.68780642	-0.438640696	8.335591779	8.353995476	19.761436	37.1556829	-1.953553702	-7.291370728
am121	SHF	ROCKET	1	0	3175.0955	-3.307081824	-2.100311539	9.733668221	9.373586957	1.827799359	17.50311025	18.79662616	5.498720946
am121	MP	CIGAR	0	0	2236.3979	-2.004801951	-2.69341014	14.70448026	20.5217381	12.993678	2.842294597	19.29819951	1.371871057
am121	SMP	CLOCK	0	0	1960.0948	2.166339571	1.665889534	-22.81110838	-28.4431811	-14.4411143	-15.88497124	-34.70109366	-6.723132184
am121	SHF	TOWEL	1	0	1710.7083	-0.752599402	2.017572572	0.764412932	-1.829923011	-1.658342055	2.093516511	-8.172894019	18.41058849
am121	SHP	MAGNET	1	0	1513.0114	-0.632047026	-0.658154004	12.23614594	15.83823792	32.87382676	1.101681829	8.985940959	-8.705574427
am121	SHF	FLAG	1	0	1488.479	-0.707429311	-1.201506756	-0.583622077	-3.697752579	-12.02646254	18.99603813	0.982292395	7.588322425
am121	SHF	NEST	1	0	1662.4307	3.717788726	1.569012252	-7.40987139	2.413164241	-18.05421117	11.28070231	-41.20160498	-2.176941489
am121	SHP	TRUMPET	1	0	1893.6893	3.742453111	-0.08516913	5.407847208	0.892471845	18.49854005	-4.399521838	6.378912985	9.958494586
am121	SHF	DIAMOND	1	0	1902.2723	1.118873317	1.186643076	6.825166839	-9.481981448	25.56023843	23.72370039	3.707129619	29.93164356
am121	SHP	CRAB	1	0	3842.7232	-0.659913749	4.755773649	2.065096404	18.11089483	-10.95344638	-13.05827598	-17.7399082	-4.43427373
am121	SHP	CROWN	1	0	2083.8541	1.70524933	-1.473382865	-3.210405683	-6.86363961	-6.358993072	8.258998219	-17.77158758	18.39782907
am121	SMP	SHOVEL	0	1	2774.9952	4.018280179	2.203761919	0.364213333	-4.637197388	5.32838713	12.47206884	18.44878853	-13.76741616
am121	SHF	BACON	1	0	3178.9213	1.209776867	2.867740908	10.89062619	15.83256859	-4.693323016	-1.639339396	9.207991544	19.58277331
am121	SHF	SOUP	1	0	3967.6128	-5.093811962	-2.096567786	-9.529367563	-6.947930624	-13.31646815	-28.32359192	-1.175569338	-11.77956566
am121	SHP	DRUM	1	0	2285.861	2.145659929	0.912661555	14.48543901	16.15451929	11.34233324	-22.32540449	22.10681288	24.13716225
am121	SHF	SHOWER	1	0	1764.3883	-0.628650744	0.23675743	4.949759482	8.148529015	-11.08317549	-6.115683275	25.06621047	-2.805681858
am121	SHP	PILLOW	1	0	1763.2131	0.966490816	3.080465497	23.18253679	37.6160948	23.49008118	12.27760426	-1.3494524	11.09047489
am121	SHF	WOLF	1	0	1477.4596	4.773794696	2.255424524	-7.064719818	-4.271220961	-11.01871716	4.197196886	-26.8280676	2.084507735
am121	SHP	CAKE	1	0	3191.7216	-4.594863914	-2.096054045	6.834561068	11.16834176	9.977750787	4.99392745	-1.635930863	0.654947097
am121	MF	PHONE	0	0	3799.6545	-1.49703878	-0.428211732	-1.52535771	-3.774121978	1.669921949	-12.01716072	3.966482652	1.904292913
am121	SHF	OVEN	1	0	1676.8583	0.998583883	-0.147312556	-0.844921914	7.029000801	-18.99595549	32.57206721	-13.64845936	-10.78961198
am121	SHP	FORK	1	0	1995.4563	-3.461833452	-0.209909746	15.00886059	4.751815835	15.67674098	-3.277358785	36.21811848	32.41177894
am121	SHP	OMELET	1	0	3200.5152	2.473883417	1.729284758	13.43074243	18.40788564	19.35991956	20.09339017	0.600110736	2.658262506
am121	SHP	SYRUP	1	0	2277.4319	0.833638856	-2.71427119	9.071119234	6.351693219	-4.037586995	11.05624836	29.09271745	8.828986055
am121	SHF	BARREL	1	0	1598.6252	-2.251701606	-1.426315226	14.60702207	14.94967135	11.80914348	19.54101176	1.414808984	26.51844353
am121	SHP	PIGEON	1	0	1825.0707	2.944531088	-0.566948186	6.037928661	10.55652338	20.35453966	9.416296793	10.80878178	-26.70996486
am121	SHF	CHICKEN	1	0	1359.1007	0.947590196	3.506889991	-28.6677294	-34.97606591	-19.90807814	-25.42069735	-35.71761559	-13.82507861
am121	SHF	HAM	1	0	3033.2855	-0.44625075	-1.711216365	-2.139570539	-6.841611122	8.91095232	-1.246465518	0.672595545	-2.375652859
am121	SHF	GUITAR	1	0	1968.0556	4.145023223	-0.805007474	20.04817897	25.01327375	42.24756627	3.058856057	14.45064388	-0.99011158
am121	SHP	MOTH	1	0	1519.4802	-3.244476144	-0.528567334	21.25650818	31.68096436	23.95422537	2.661437752	1.948842832	17.19609088
am122	IP	STOOL	0	0	2940.457	-3.533477211	-6.700233176	0.568742025	-3.468544829	21.16263587	-1.372447689	2.037633453	-18.60724272
am122	SHP	MUFFIN	1	1	2548.5312	-0.22450472	2.081053828	7.212501217	4.783939912	-1.18051329	13.54146679	10.8695057	24.28989054
am122	SMP	CANDLE	0	0	3402.8541	1.988862496	2.011261655	2.87792948	-3.416119566	10.87373036	-1.490480873	3.537189015	27.8738857
am122	SHF	ANCHOR	1	0	2488.4256	6.950234555	2.29234659	19.31834872	27.99153459	3.71209603	17.20805912	33.66133135	-24.19227888
am122	SHF	PAN	1	0	3084.3929	-0.636297968	0.203981228	22.92600255	23.3142156	7.405704673	17.99620106	39.27699707	28.21227708
am122	SHP	OTTER	1	0	3365.2967	2.148428659	1.642342316	10.9196712	14.31675999	8.524111355	7.287444178	13.2856357	-4.210955091
am122	SHF	PENCIL	1	0	3383.4485	-1.079658381	0.595321787	23.17779399	35.61180085	-0.284691394	-6.376484965	40.31077214	2.695357054
am122	SHF	ARROW	1	0	3110.9193	3.329815318	-0.889367618	-26.13101619	-14.66636131	-38.03457131	-27.29154845	-42.97432076	-36.29029809
am122	SMP	BACON	0	0	3147.5019	-1.145925778	-0.313779234	-9.289003365	-3.777178399	-18.59148905	-17.97831221	-20.07460895	8.505370767
am122	IF	SHOVEL	0	0	3185.3118	2.113328324	0.892058593	5.25583749	-1.372808035	14.13387515	31.50057138	-0.827795913	4.858827662
am122	SHF	DEER	1	0	2158.6973	-2.057437932	0.327994147	9.672131976	14.0032787	-6.67760376	6.32018038	18.31192054	5.823514644
am122	MF	SHOWER	0	0	2788.7771	-1.695586332	0.200489128	31.49649147	43.48203076	28.30003118	18.53553583	21.04616432	2.825748467
am122	SHP	STRING	1	0	2537.7026	2.670194817	2.364095219	-3.391894557	-9.693476992	-4.433717564	17.72972925	12.22617149	-19.63730772
am122	MP	KNIFE	0	0	2284.4064	-2.797552751	-2.728672535	17.04545798	12.79172776	35.51386386	-11.7010771	18.78888331	36.56469535
am122	SHF	CRAB	1	0	2731.8305	-2.215740112	-0.481445622	-10.21003685	-19.77505467	-9.730827784	3.539423087	2.614802388	4.260930864
am122	SHP	CHEESE	1	1	2711.4071	3.818214738	2.607862954	10.64768775	6.642584606	13.88965638	15.36466548	15.24839152	13.13410039
am122	MP	APPLE	0	0	3509.8526	-1.359901921	-2.722675805	11.72207446	12.86893371	13.02570574	-22.14057241	24.2313702	20.92634897
am122	SHF	WOLF	1	0	2546.616	-0.860247381	-1.526317454	0.629189535	-0.969225898	-18.88585289	-0.895693677	19.67465059	16.69071968
am122	SMF	SOAP	0	0	2829.381	2.153096977	-1.109034222	18.12857321	24.97378609	32.93527692	-6.340729517	0.932242267	9.680176796
am122	SHP	KEG	1	1	1552.8018	2.725214212	1.647006878	-19.25132957	-30.1332259	9.619919376	0.933215951	-38.71782899	-3.127100879
am122	SHP	TOAST	1	0	2906.1763	0.854400532	-1.215341523	16.37885888	19.27854353	5.128690107	-6.75724199	40.29083054	6.354195369
am122	MP	JACKET	0	0	1992.6101	0.600440044	0.178387654	25.16485523	34.1987235	17.70113326	5.168981783	28.86434234	5.012346529
am122	SMF	TOILET	0	0	3026.5164	-0.9686148	-2.558649178	-11.17628172	-16.11990295	-16.02866107	7.185686998	-5.782968475	-4.830909317
am122	SHP	NEST	1	1	3448.6097	5.022564221	1.179250667	15.32169016	20.41932558	17.8666208	1.88306395	4.724878818	16.52093946
am122	SHP	CANOE	1	0	3084.2938	6.078951869	3.237700552	-1.642990442	9.822902094	-14.22743979	4.71638442	-34.68655799	10.7660256
am122	SMF	BENCH	0	0	3280.9775	0.298662395	-0.533640931	14.53044482	13.88512605	26.03691136	10.92104959	6.239283306	14.589361
am122	MP	GLASSES	0	0	2929.4622	0.182688126	-2.704713207	-12.28888045	-16.32253202	-28.93636188	28.13005443	-3.263374946	-21.24601539
am122	SHP	BROOM	1	0	3882.3424	5.12675191	3.729801088	14.23736638	23.21662576	-9.548314522	5.586398886	14.9873663	19.73433671
am122	SHF	DIAMOND	1	1	1658.9448	-0.275921146	1.753118871	10.96543176	12.0010758	25.36170002	20.43549494	-17.59516804	16.91081459
am122	SHF	MANURE	1	1	2739.2848	1.93769043	1.231831541	2.475772828	12.63780014	10.7772985	-16.38672414	-23.53571595	-2.537155366
am122	SHF	OYSTER	1	0	3143.718	1.86562884	2.79504759	19.96271701	29.67751123	14.32722809	12.82038781	16.06980606	-9.783458814
am122	SHP	CARROT	1	1	3340.1187	6.196170697	3.595930157	22.74397793	30.76324148	19.05167252	17.78334448	13.40468631	6.580445441
am122	SHF	CRADLE	1	0	3469.9438	3.010239648	1.245038823	2.623571277	1.051109707	-10.61368082	-10.223277	35.93674024	-7.285726491
am122	IP	TRUMPET	0	0	2517.958	2.462593796	-0.436105282	-3.789433859	1.332038917	-17.16246097	-17.10274237	-2.943519065	8.628472735
am122	SHF	MAP	1	1	2644.1083	3.214504563	0.712820652	11.06792227	6.530596336	18.07036725	18.57197681	17.84329466	1.311288297
am122	SHF	PURSE	1	1	1899.018	4.957639741	1.550830401	4.254709532	1.665418149	22.78895078	11.17727218	-12.55438738	4.155407737
am122	SMP	CHICKEN	0	0	1888.2432	-1.903019936	-2.607181208	-9.626316452	-16.70212583	-16.73055341	6.217592764	7.210461536	-4.365083396
am122	SHP	COUCH	1	1	2376.3978	2.413836332	6.249591674	8.626546315	10.3925234	7.966817896	-6.940237071	16.47259615	4.160934797
am122	SHF	NEEDLE	1	1	1901.7087	1.84700689	-0.331101379	5.880821798	-6.306419036	29.74567433	19.64492538	7.455305464	8.508586116
am122	SHF	STAPLER	1	1	2391.8383	5.285300674	1.60898326	19.15732555	24.53891126	6.131446691	-1.648790609	32.65805106	14.80185791
am122	SHP	TURTLE	1	1	1999.9535	0.315736867	1.546443003	8.387481857	9.865315855	9.899523614	-4.278572696	15.63247223	-1.374032046
am122	SMP	COFFEE	0	0	3120.7352	-1.752471189	-1.094108373	11.85065045	15.24325019	2.111037895	-3.899617868	40.88421395	-23.13824264
am122	SHF	WINE	1	1	2279.5558	0.098372788	-0.93967686	12.08180032	21.60822002	-21.41693348	24.20359804	17.52498258	-0.293372694
am122	SHF	WHIP	1	0	1623.2618	3.814313216	2.049155805	-12.08250296	-20.92316358	11.72222517	8.198339072	-23.37936226	-13.08493158
am122	SHP	CANE	1	1	2135.5873	3.171411071	0.413506669	-9.081460142	-10.19708207	-17.27107292	0.924051794	-6.630134811	-2.551425076
am122	IP	TOWEL	0	0	3296.0838	1.505134025	0.526163234	-23.08525606	-30.39510954	1.78523436	-12.69126748	-38.58975944	-15.10613746
am122	SHF	PAINTBRUSH	1	0	3250.0751	2.02447408	1.550639009	-2.291208498	1.046008655	-2.32666703	-16.86205256	-6.941210618	4.933990804
am122	SHP	BELL	1	1	2531.4923	0.340244387	0.004182904	17.73156941	18.60440779	28.98121475	7.366296519	15.59640648	6.134268218
am122	MP	DRUM	0	1	3362.4529	-1.948066236	-1.923290338	20.41766348	22.1884108	-7.626449429	10.40454692	49.59381208	25.69236763
am122	SHF	SWORD	1	0	3407.1145	0.198612507	-0.489526453	6.337211685	15.94747622	-24.56321328	-21.04118957	31.009585	1.162434246
am122	SHP	LION	1	1	2950.9907	2.659872406	1.963029659	-3.428676093	-1.983232113	-3.974053891	23.13427489	-14.33708322	-23.51154074
am122	SHP	LAMP	1	1	1804.1098	0.429779971	2.058125476	13.86201306	13.62114915	33.20504166	20.75975212	-2.493402023	-2.701109618
am122	SHF	BIBLE	1	1	2470.8695	7.43146364	3.483764588	-6.896581206	-2.547660545	-6.521566661	8.54472933	-29.56654053	-10.06071847
am122	SHF	NET	1	1	2603.6481	5.588834538	4.828609783	1.658460206	-6.617031798	13.60720309	-5.444351736	9.62103778	19.851458
am122	SHP	ELEPHANT	1	1	1383.8859	3.944111381	2.347585104	13.98679555	15.1706242	5.198181937	13.09919462	26.60671149	2.531158714
am122	SHF	MUG	1	1	2159.2267	6.616614291	4.086928594	14.24191827	17.43900527	25.05915802	3.514463999	19.14345355	-23.09065289
am122	SHP	SPONGE	1	1	2689.9005	1.15085193	-0.374180902	2.621102746	-0.109400013	3.293519942	3.838945261	12.99939795	-3.648886863
am122	MF	OVEN	0	0	2326.3479	-0.169372384	-0.230985389	2.826158103	4.61309391	17.31999607	11.75794299	-12.0093009	-21.11418187
am122	SHF	CAMERA	1	1	3257.3081	-0.254956006	0.288558453	15.72523631	20.16914418	29.40101429	15.17266476	-0.329200026	-8.149898767
am122	SHP	CAKE	1	1	2301.968	4.828359993	1.5195103	-25.37985398	-30.16296765	-16.61975912	2.841754026	-42.52876302	-18.09788678
am122	MF	HAM	0	1	2681.327	-2.193817849	1.030599394	-5.047579847	-5.660429765	-7.853565663	-1.603919175	3.913070286	-16.77774671
am122	SMF	SEAL	0	0	3641.1026	-3.197786847	0.12623263	13.15374244	18.87203945	27.89813643	13.37198228	-13.28094228	-1.90014576
am122	SMP	CROWN	0	0	3239.4784	3.703164828	1.593421951	18.95033944	19.81897839	19.04715019	23.78010582	25.25219691	-4.33826494
am122	SHP	PLATE	1	0	3180.7959	2.920979259	1.796477244	13.90000662	17.40746507	-6.730033901	-0.120737253	44.44348018	-4.134517672
am122	SHF	PIANO	1	1	3354.0214	5.732447544	2.293078831	21.52210118	25.3526271	21.88434473	58.49493499	-11.23129021	13.57205153
am122	MP	CANNON	0	1	2745.9283	0.671010519	0.169514958	4.060548689	12.6228244	-0.898802958	-26.66873802	-2.160120842	13.63263772
am122	SHP	BOWL	1	0	1824.58	6.280406369	5.21225943	-12.82288623	-5.677194741	-14.23975636	-17.5948021	-27.2765583	-19.11480788
am122	MF	FLASK	0	0	2805.8729	1.675852693	1.212232622	-7.944564753	1.341230144	-28.43436172	-35.42660741	-1.355254478	1.400450039
am122	SHF	CEREAL	1	1	2211.5866	5.724442829	2.752214865	14.6695055	18.61042702	10.47368241	18.51390587	18.33774967	-11.75184561
am122	SHP	PILLOW	1	1	2795.8911	-0.630409012	3.027277704	1.158503566	12.77405718	0.593851845	-8.576919544	-19.92220675	-14.76546033
am122	SMF	TIGER	0	1	3062.0626	-3.544464832	-2.93102662	8.994712001	8.204113355	-4.296653566	10.32410756	19.76865539	19.34806286
am122	SHF	HONEY	1	0	2109.5063	3.66919757	4.264646626	10.94853927	23.29527915	-2.573410935	18.75071386	7.343523909	-37.26321902
am122	IP	TIRE	0	0	3958.1824	0.384508911	-0.148793973	-7.182910555	-6.204765375	-13.61145414	1.642153295	-10.07709004	-5.199611491
am122	SHP	LIZARD	1	1	2756.8725	0.924701767	0.638792803	1.72121827	4.597360184	-1.085085251	0.378686752	-6.850645816	8.311436781
am122	SMP	FLAG	0	0	3494.5851	3.95944614	4.397056821	29.19814985	38.05172195	16.16784641	13.46515016	34.04512387	14.19996347
am122	MF	LOCKER	0	0	2826.3502	-2.946401601	-2.19203321	-7.497934469	2.537475912	-33.95550826	7.927350408	-18.49693896	-10.65395965
am122	SHF	BALLOON	1	0	2391.5524	2.071352281	3.352153019	0.671406742	9.070867984	-1.920451602	16.20466342	-25.62898806	-13.66269383
am122	IP	BASKET	0	0	4312.0344	-1.206838388	-1.591285235	0.742069439	-9.136940498	8.617182977	18.68825807	16.11857205	-8.360246044
am122	SHF	MONKEY	1	1	2534.8429	4.274915201	7.650397526	0.54775583	-2.036435534	-7.85229818	10.46591347	23.5568192	-22.42678842
am122	SHP	KETTLE	1	1	3485.4092	4.69882319	7.462138319	25.0314907	38.92007578	20.92747172	-38.74703039	8.808842815	61.34856287
am122	SMF	ENVELOPE	0	1	4128.0279	1.799983281	-1.035641808	-0.306033785	-1.320101385	15.56697318	5.207503913	-15.2690036	-5.954205114
am122	SHF	HIGHWAY	1	0	4055.683	-4.965423101	-2.915563313	13.94721283	13.07119738	4.981892165	19.46094856	9.238349173	39.78778325
am122	SHF	MOTH	1	1	1951.4482	3.393457193	2.495136392	11.41877195	18.13433245	2.24650424	-7.079933734	10.14949625	16.09882008
am122	SHP	CASTLE	1	1	3359.9069	0.785138313	3.254341382	-0.103760866	0.372587505	11.02079892	3.691495433	-9.352857649	-13.36572413
am122	SHF	SCISSORS	1	1	1710.9083	8.284571699	5.131266695	-2.160494826	-2.088453544	-6.226570662	22.40172548	-14.25375421	-2.023550383
am122	SHP	PIGEON	1	1	2548.888	2.465716813	2.500165642	-3.93298051	-2.03620293	-3.315361717	2.180432632	-19.42264811	5.087138389
am122	SHP	MITTEN	1	1	3968.3269	3.500181913	2.538791	11.93956297	9.598149905	26.76246772	5.37244958	8.302252937	10.10028342
am122	SHP	MOUSE	1	1	2234.9141	3.649741694	2.219801428	-12.1983842	3.668517857	-22.74159917	-16.52875153	-34.31374498	-37.44260175
am122	SHF	ROSE	1	1	1338.2305	6.157775591	5.356840382	-12.78820418	-12.37892257	-4.451969971	-15.69855065	-20.67752693	-14.03615255
am122	SHP	TROPHY	1	0	3959.0373	3.054329938	-0.719125953	-13.56763686	-19.66989709	-7.99613659	-26.77465091	5.60000907	-8.535365611
am122	IP	PIE	0	0	3325.2584	0.414851569	0.014420529	-21.39651998	-42.34681998	1.348467012	14.75318344	-16.30681671	1.027527284
am122	MF	NAPKIN	0	1	3184.1495	0.937989678	-1.141330008	-27.14585935	-46.93385194	-6.23854636	-1.94118722	-26.74744439	14.72267511
am122	IP	HAMMER	0	1	3852.0537	3.177986875	2.24052283	14.11640616	18.51887196	-2.150988714	-8.234966258	31.51777479	16.89444504
am122	SHF	SOUP	1	0	3174.6934	2.419670098	0.937022442	-13.45290688	-37.98127547	16.40826497	7.630321522	-1.307351443	20.96101355
am122	IF	CORN	0	1	3507.6307	-3.08203672	-2.059504961	-6.214558881	-7.945625394	-20.74077247	-31.09239484	26.00818472	4.594888745
am122	SHP	PARADE	1	0	2423.0804	3.429244758	2.336479516	27.49876401	19.12642684	19.62627752	40.5749838	36.14933997	60.96487284
am122	SHF	RABBIT	1	1	2069.6	5.027721191	4.039476459	12.81483832	27.55095272	-16.65069813	-4.123631127	10.59165604	11.87717059
am122	SHP	GOAT	1	1	3250.5121	3.52427413	3.784137887	3.71588276	-6.602579017	18.66259192	23.87309071	0.867194927	14.13516731
am122	SHP	JELLY	1	1	1878.1462	2.548575703	2.12928057	15.41120678	15.73858342	10.53597072	7.639668409	30.43741697	4.97334937
am122	MF	BRAIN	0	1	3301.255	7.55739166	3.487301541	-7.924453843	-0.239687697	-36.15576594	10.09333648	-10.57235456	-12.41545381
am122	SMP	SYRUP	0	0	2940.9081	-3.988506868	-6.56363221	-31.24262512	-26.75171284	-37.52182916	-9.16703293	-58.15764606	-21.69801662
am122	SHF	TAXI	1	1	1570.5743	0.987966328	1.814121123	17.63295415	8.425471965	43.71875683	18.0934915	26.75935448	0.316701024
am122	SHF	ORANGE	1	0	2682.9094	-1.295835996	1.425695949	16.15077722	21.63770477	3.33869582	26.62199979	26.05942866	-21.59607313
am122	SHP	CIGAR	1	1	1849.2321	4.467347234	0.753314104	-9.343731327	-12.04462545	-6.582028222	-10.46367933	-16.72479462	16.28839078
am122	SHF	MAGNET	1	1	2020.4667	4.462771066	4.644669661	29.22769844	44.62759205	0.974024217	11.06013023	48.05728266	-16.35185218
am122	SHF	RAILROAD	1	1	3473.2815	-1.893358245	-0.491670878	-12.47048627	-20.49091175	1.133898773	-5.351339541	-11.82237144	-3.216090067
am122	SHF	MUSTARD	1	1	1822.6276	4.640798031	1.740015061	25.07886281	36.24183586	12.37868008	14.5809476	20.55191876	6.807748198
am122	SHP	BARREL	1	0	3138.9266	6.10854775	5.61073137	-24.212329	-40.89319565	-16.94102081	7.095033181	-11.86898243	-2.614164398
am122	SHP	OMELET	1	1	2121.5777	4.406135406	5.034276022	11.20258448	3.780090784	13.43463202	30.30224354	2.772037461	42.70267326
am122	SHF	HOOK	1	1	1971.6527	4.524322099	1.794378298	5.182608839	3.418767504	22.60591215	16.70300617	-7.214382327	-11.58237594
am122	SHP	POTATO	1	1	1806.772	-0.957680695	1.172598149	22.07401163	32.30346079	-1.807365026	28.69771502	13.61585962	18.61646485
am122	SHF	FORK	1	0	3245.0451	-1.921983389	0.995656111	-24.42222913	-38.12309126	-19.98860071	23.14874002	-28.1177959	-4.707974917
am122	SHP	LIME	1	1	2239.4284	1.984232558	2.750188652	20.78697992	31.82945627	-8.79413728	14.23099433	30.08923771	7.322354202
am122	SHP	PYTHON	1	0	1361.8174	3.003020539	-1.550687222	-22.26395586	-33.56387851	-11.02120933	-16.81801966	-15.74687214	2.412726575
am122	SHF	MILK	1	1	1923.0583	1.58658401	0.341623215	-19.9651925	-38.12214339	15.51238962	4.988294015	-25.31994474	-6.923225031
am122	SHF	SPOON	1	0	2007.5893	2.610780842	0.567652222	19.82807322	38.60632943	7.99088317	-10.39568122	3.906930173	0.654215504
am122	SHP	TRACTOR	1	1	1507.4998	2.11896599	1.982470124	-2.30534284	2.933389504	9.768410576	6.439286021	-17.95591524	-39.95611611
am122	SHP	DESK	1	1	1645.0874	-2.696599961	1.803489028	16.00268929	21.14821196	23.16075011	27.29260517	-6.463774527	-1.196074864
am124	IF	DOLLAR	0	0	3247.6171	1.561470784	0.807293675	-4.652367863	-14.711246	-1.903857712	-23.75624093	16.57931528	14.0279984
am124	SHP	DRUM	1	0	3276.7158	-0.185283826	-0.721558054	1.531157338	16.70962365	-8.771272147	-4.666488521	-3.180936954	-31.07942775
am124	SHP	RABBIT	1	0	3218.6819	5.398968447	0.386918681	-1.399303992	-8.924819303	16.9561171	-12.16183931	11.93936932	-2.192280974
am124	SHF	HAM	1	0	2703.5302	5.221409426	3.089135275	-17.9054424	-42.34128887	-10.90830323	2.635517146	13.23063052	7.525311762
am124	SHF	MUG	1	0	2921.9205	6.251064981	-1.225410133	-11.4760932	-14.40923174	-2.465538542	-12.0972421	-10.07592644	-11.25574358
am124	SHP	PAINTBRUSH	1	0	3212.6277	4.321697271	2.930334851	8.200451065	9.385098486	-4.7456337	8.624542563	1.177246	24.86063274
am124	MP	TROPHY	0	0	2612.8294	-2.272248506	0.186159443	2.20395513	8.973309753	6.883988714	-2.143808353	-5.796992444	-12.82805821
am124	SHF	SWORD	1	0	1653.2949	3.569798235	-0.362761095	11.24395773	19.95011032	6.064547664	5.251698468	5.889473339	-3.241977409
am124	SMP	PAIL	0	0	3172.3907	1.132350695	-0.364385437	-21.79768313	-30.78188817	11.89543698	-20.90778546	-29.14589494	-14.41676542
am124	SMF	LADDER	0	0	2548.5636	-2.563917535	-3.138256113	-7.309218915	-11.37154304	-20.28457841	1.253067067	-14.08973074	21.74032284
am124	SHP	RAILROAD	1	1	2509.9693	2.425123614	1.127566619	17.79076362	34.63719351	4.694567822	28.80253319	-3.244690637	-9.274778501
am124	SHF	ANCHOR	1	0	2387.6236	5.386498376	1.293103146	3.022027291	-2.613547773	24.00491324	-7.765654712	1.950243409	11.03516795
am124	IP	CAKE	0	0	2582.9489	-2.919299694	-1.774617043	-2.872741801	-17.66870879	-1.758862401	20.97874809	19.45163368	3.551834492
am124	SHF	ROSE	1	0	2593.8815	5.970346072	1.009120243	3.83121223	10.21451272	-1.09418999	-2.020610914	9.178430894	-16.20458109
am124	MF	PILLOW	0	0	2772.6629	-4.460243133	-1.952388314	-0.162942567	-12.9338134	4.521428783	6.757607989	4.074449011	29.59329145
am124	SHP	DEER	1	0	2472.8555	2.919090619	2.509343582	32.39134622	35.27683251	37.81636742	0.292416414	41.91784874	27.00713559
am124	IP	FENCE	0	0	3077.6107	4.71688318	-0.227519104	4.952246053	-9.246804904	6.70275423	16.13148641	25.13860718	19.85592802
am124	SHP	OYSTER	1	0	2966.7978	5.268398993	0.306684337	6.970117913	16.83181174	-17.51832452	11.05312747	2.020023841	-0.348397822
am124	SHF	LIZARD	1	1	2549.1933	4.452623234	3.08272285	-12.392743	-25.63836261	-1.508071577	9.425920208	0.139345623	-7.168159946
am124	MF	TOAST	0	0	3098.7969	-1.346510048	0.398599095	-21.16301572	-31.47139747	-26.22345328	-19.699583	-18.28544652	14.72784429
am124	SMP	PAN	0	0	3222.4558	0.162970308	-0.55795566	-4.187419834	-10.76292145	0.119048281	8.300144044	-5.125202794	7.195949585
am124	SMF	MILK	0	0	2951.6897	-3.779694219	0.065703643	-13.16061757	-13.99270964	-20.45545735	-20.71049865	-1.623731268	-12.5306613
am124	SHP	SHEEP	1	0	3301.3849	3.627436779	0.899401713	-10.54074307	-26.84404395	-11.29621973	10.4858545	9.074058959	8.120318396
am124	MP	CHEESE	0	0	3062.5988	-2.916307572	-1.352556828	24.38396834	32.67291899	14.95073202	23.33928015	21.46948555	9.058975831
am124	SMF	NEEDLE	0	0	2444.5441	-5.096848525	-2.026709778	-6.317300266	-6.941150367	-1.444825937	-28.08139166	9.942212294	-14.31623786
am124	SHF	NEST	1	0	1642.827	4.364125337	1.707102993	11.36204499	6.6660595	-20.40675252	29.78908566	28.16995881	24.73324282
am124	IP	PLATE	0	0	2071.4808	-0.115994571	-2.725106831	-3.840395744	-16.98409809	21.35220768	-10.2455503	8.693891995	6.320103611
am124	SMP	ROPE	0	0	2945.5034	-1.019120575	-2.434630544	-14.6788733	-27.84597127	-19.52031445	-24.60098523	-0.8114151	24.92447326
am124	SHF	SOUP	1	0	3072.1802	1.913334595	-2.059195689	25.00238191	27.5770228	24.79495403	21.12973305	15.89174028	30.17475945
am124	SMP	HAMMER	0	0	2744.8075	-9.355671783	-3.21896976	2.492885279	-3.859139441	23.17834142	-14.13334234	14.32490921	1.222336306
am124	MF	MAP	0	0	3283.2279	-7.109483105	-4.450307915	23.8082746	33.80617343	6.676397434	28.03054777	20.38813016	7.015778538
am124	IP	COUCH	0	0	3331.4745	1.560177641	2.194314519	12.94757848	21.57496468	-0.507811836	13.91815066	14.45765177	-6.534252447
am124	SHF	HOSE	1	0	1776.3425	3.213142399	-2.253559746	6.46189891	12.86098315	26.30902889	16.46050658	-25.56534504	-1.670266834
am124	IF	CAMERA	0	0	3022.2915	0.361016376	0.639074705	-11.17671523	-13.12090956	7.628733066	-12.53547651	-12.46375397	-19.89731423
am124	IP	KNIFE	0	0	3226.6465	2.19980889	-0.498746422	-8.575774764	-7.522974718	2.218372118	-4.619816186	-26.61405318	-2.853292886
am124	SHF	PIANO	1	0	3243.1142	2.167092702	3.503877198	-11.99428232	-14.44436032	-20.03373327	-16.04846539	-8.98362909	3.134238779
am124	SHF	CANDLE	1	0	3371.3755	2.17660472	1.121286272	8.878158759	21.51274966	-4.908759497	1.84059042	-4.834385823	0.073772406
am124	SMP	PIE	0	0	3011.0665	-2.418693853	0.895837573	-11.49717112	-27.74911838	8.750824936	2.826446825	4.247567188	-3.764979994
am124	SHP	TIRE	1	0	2935.6617	1.682742588	-2.785035443	-2.491352639	2.294809839	-11.23529383	4.71826213	3.502558941	-22.93279943
am124	IF	TRAY	0	0	2672.5352	0.01825745	0.982120861	-11.54326686	-27.0518001	-5.082451673	1.604220373	5.493593757	5.964550618
am124	SHP	BALLOON	1	0	2537.2288	7.483938219	5.205522058	7.193583139	11.25466478	-8.512511185	13.54897914	20.65365923	-12.76318584
am124	IP	BOOT	0	0	2551.0364	-1.261972686	-2.338221082	3.938594166	22.8395349	5.29096363	1.895208084	-35.83310107	-12.07182275
am124	SHF	MOTH	1	0	1797.3086	4.933139531	0.546276151	12.01161517	32.06985841	-10.05798672	-19.56792276	6.069468526	-7.674233435
am124	IF	BENCH	0	0	2144.9827	-2.764407953	2.611354416	3.852715675	-1.690715393	10.66476008	7.820795832	9.484298333	6.872933806
am124	SHP	HOOK	1	0	3402.1073	5.482738086	7.30245582	7.596962442	-0.950028922	33.2132089	20.35582032	2.999979233	9.805147106
am124	SHP	PIGEON	1	0	3261.3949	3.224706783	-0.069389559	2.499784357	6.297836412	-13.7673367	-13.25703562	6.472578013	10.55942683
am124	SHP	BIBLE	1	1	2613.2738	4.944163453	2.642144414	23.29620895	38.25817332	13.53518564	11.75010999	26.41327009	-15.17739844
am124	IF	MUSTARD	0	0	3337.8429	-2.122644775	-1.641053402	10.84149427	25.05124976	0.626322179	-6.466416422	-1.313593928	-1.845072869
am124	SHF	SPOON	1	1	2159.6133	6.299701441	3.179364536	11.03505865	12.97206421	16.43138309	14.77428558	3.761318469	5.684183971
am124	SHP	BUTTER	1	0	2657.8825	4.544920567	1.365187941	22.00481062	35.11265611	16.87772589	2.855714162	22.36025685	-5.967608083
am124	MP	BASKET	0	0	3927.0609	0.461563532	-1.108959116	-18.69782264	-46.66213227	-34.46891275	-7.135369598	23.79250903	32.62137509
am124	IF	BROOM	0	0	3181.1969	-0.718314356	1.430530698	-4.84128321	-3.873455043	16.76117235	0.827865544	-14.49672404	-20.65375781
am124	IF	CROWN	0	0	4069.8862	1.271826036	-2.082825506	-22.34794625	-48.79802207	-24.68768794	-3.986914449	5.046310445	25.03762515
am124	MF	BRAIN	0	0	1826.0508	0.056512953	-0.471426135	17.97989901	25.05786214	17.60399631	0.36742408	15.28257282	9.046642518
am124	IP	DESK	0	0	3786.3925	-0.284784044	1.11264099	3.15921855	1.90387703	9.720417278	6.225418235	5.141116004	-3.272811754
am124	SHF	MONKEY	1	0	2612.1676	6.504671468	0.167669914	22.43488126	39.83035312	3.656347936	14.87050357	17.25885902	-8.256412782
am124	SHF	CORN	1	0	1842.1743	2.50822825	0.807125036	-17.57497089	-16.74546741	-11.40093718	-32.63038526	-17.34193817	-16.51498472
am124	SMP	HONEY	0	1	2580.2936	-1.950646907	-0.994018286	-8.724867997	-15.2083421	6.716907144	0.961637275	-23.40263156	10.59199068
am124	SMP	PARADE	0	0	3706.1411	3.190857553	0.133624525	-5.941760432	5.080550677	21.361303	-15.1441084	-44.5107794	-16.17888195
am124	SHF	TIGER	1	0	1870.8857	1.083885016	2.961770478	-1.053797184	-6.431413883	12.03069982	8.322795987	-10.69875338	10.67538678
am124	IP	OVEN	0	0	2923.9393	-5.070706305	0.290482435	-0.465988014	-4.400657553	2.881783164	2.392621011	1.441869035	5.652560942
am124	SMP	ORANGE	0	0	2822.4188	3.46718813	0.799050593	2.6981754	7.186118844	23.84465199	24.55519286	-16.90138176	-23.40122229
am124	SMF	WINE	0	1	2077.8085	-1.340074863	-1.335328483	35.22069264	54.37043655	40.8657101	20.35391421	29.18206067	-18.86133945
am124	SHF	SHOVEL	1	0	3887.3538	-0.834034068	-1.270447554	13.7760536	13.00052191	13.95121729	7.067490611	19.01507429	14.30955973
am124	SHP	KEG	1	1	3371.2466	7.601820056	3.923775384	-2.361625934	-2.173374074	25.5889593	-33.59460702	2.706348416	-14.98453509
am124	SHP	CRAB	1	0	2408.5464	0.467523366	-0.032729224	-26.22932768	-45.81565048	-2.040179447	-10.18716496	-4.060674259	-19.83863337
am124	SHF	STAPLER	1	1	2035.2211	2.369189878	1.77269546	9.363114324	9.466512683	-19.35699304	21.50574149	13.76931385	22.80533767
am124	SMP	CANE	0	0	3325.1941	-0.056664271	-4.052662778	-3.763305041	7.003702461	-11.25191467	13.55045202	-23.49513524	-21.02152666
am124	SHF	TOWEL	1	0	2514.6386	4.605329692	-0.25719547	-3.765625821	-11.89021376	-19.76516209	18.46429691	6.146464182	12.38185041
am124	SHF	STOOL	1	0	2448.2846	0.653796203	-0.092446161	0.620283113	4.325456919	13.98412554	12.48551589	-16.65821808	-11.51701241
am124	MP	ARROW	0	0	3383.5928	-0.335835415	-1.974877815	-33.07496509	-40.82495847	-18.96184172	-23.54825415	-44.80217844	-11.65828596
am124	SHF	BANANA	1	0	4520.3201	0.761114362	-2.628298405	15.04404027	5.807516571	26.52452476	30.95533906	20.51232364	18.55400701
am124	IP	MITTEN	0	0	3232.8627	0.022601331	-0.33760675	-6.738096176	-4.489339945	-41.39045537	-8.201359508	7.207501892	2.284768857
am124	SHP	APPLE	1	0	3808.2439	1.162919554	2.520628539	-1.200102539	9.484474507	-16.50090506	-10.17176619	-22.93109923	9.390361187
am124	SHF	STRING	1	0	2712.4203	-1.14327651	0.234717919	-6.257219404	-6.199354896	-24.25978581	2.929498301	-4.652407063	2.566749912
am124	IF	KETTLE	0	0	3966.4397	-0.984451362	0.629755465	-9.345298832	-21.04327367	6.387810024	-10.82000839	16.90090923	-15.42247472
am124	SHF	PENNY	1	0	3267.902	1.840858246	0.66041578	-0.252497108	-5.438899988	-3.043683515	-1.618279121	11.99897012	6.0870915
am124	IP	FAN	0	0	3316.3486	0.891706638	2.533303154	9.477537416	27.09236806	11.47200519	1.707535879	-10.15398897	-23.7705994
am124	IF	KITTEN	0	0	3187.4335	1.65719668	1.045505002	13.8943877	18.96927367	24.85367664	-6.198202865	26.23256125	-15.86577297
am124	SHF	POTATO	1	1	3215.7825	-1.185916032	0.942723323	17.18640129	13.69024676	31.14303856	41.63726943	11.68316508	6.346852458
am124	IP	FORK	0	0	3650.7709	3.765324337	-1.996966368	-11.05804643	-16.95211454	-25.08491919	-2.428688577	-2.699942095	6.552244329
am124	SMP	CANNON	0	1	3964.5395	-1.371923813	0.602123258	6.095723058	10.97918778	-16.57382857	30.13774163	-3.389861678	6.452762795
am124	SMP	ENVELOPE	0	0	3842.3858	1.619545655	1.111826492	2.571855918	3.936346128	0.988635586	11.23142031	8.985166606	-14.37398875
am124	SHF	SPONGE	1	1	2146.8527	3.755901153	-3.845981814	14.25537436	25.74113349	25.14840939	18.91274137	-18.35672593	1.403465116
am124	IP	CHICKEN	0	0	3280.2109	-0.954040289	1.516052049	-9.87617174	0.062035388	-14.85947827	-4.001931886	-48.00092161	3.763967835
am124	MP	FLASK	0	0	3097.867	-1.104108201	-0.820910035	8.900898457	19.80949019	-19.56812181	-2.423983728	11.28627831	3.030397453
am124	SHP	WALLET	1	0	2718.164	1.741618501	-0.030512255	1.277959311	-5.366433797	8.939377948	2.94934855	-5.12690829	23.71897304
am124	SHF	MOUSE	1	0	1925.6662	-0.941777438	-1.761528675	14.15916273	10.08730721	24.3235472	4.150067953	21.61331694	16.02386722
am124	IP	TRUMPET	0	0	3536.2093	2.691691923	-0.270377825	5.976935247	3.471925445	-0.161535476	-20.65311724	19.73212435	21.342055
am124	SHP	CRADLE	1	0	3325.1165	1.20179693	1.322948441	7.461206711	-10.01346245	23.96704807	15.84266591	25.42526418	24.22898746
am124	IF	TRACTOR	0	0	3261.4099	2.779575117	-0.282827092	3.09219201	9.898664812	-20.29469783	11.58848113	7.88362227	-9.734844657
am124	IF	CAGE	0	0	3568.5209	-0.393606565	7.339222433	-8.034064185	-20.56119414	2.518698817	-23.70796571	16.19261446	5.720639498
am124	IF	BELL	0	0	3384.9059	1.564137281	1.166712276	-2.715327558	14.12137428	-17.98433261	-8.935257349	-25.65513242	-13.75576557
am124	IP	SOAP	0	0	3587.6296	-0.720774073	-0.556678405	-14.92555627	-19.41729963	-27.00720698	-17.91119287	-12.04933573	10.56003637
am124	IF	PENCIL	0	1	4082.0712	-2.06181981	-1.718600049	2.229965338	-0.973199058	-1.614186903	20.0172709	6.959248087	-0.824948748
am124	SHF	CAPE	1	0	2632.7795	0.909496557	-1.858644001	5.916552611	5.641129601	42.0605246	26.27462011	-10.28541905	-21.2336518
am124	SHP	ELEPHANT	1	1	3287.2491	0.714575672	2.294184267	-12.64285939	-29.3300068	15.95634859	-4.145136515	-10.20979247	8.999791372
am124	IF	GUITAR	0	0	3903.8191	0.086225476	0.917034645	-11.76865337	-24.14896328	-12.09725559	-14.4220978	6.694778373	10.25000572
am124	SHF	TURTLE	1	0	2616.9269	-2.715655373	-3.31783378	-6.5868412	-25.73624617	46.53843848	14.78758627	-15.45884867	5.505381551
am124	SMP	CARROT	0	0	3823.5313	0.327078221	2.567183652	8.201711522	6.896192823	21.38022936	18.38750693	-9.112240325	14.71871182
am124	SHP	MOON	1	1	3401.2579	3.849173368	0.993357805	2.110676199	1.33258201	12.77518177	-15.75321429	13.910345	-7.981920923
am124	IF	CHERRY	0	0	3058.2085	1.892495769	3.376352369	-32.17962143	-43.48980207	-41.98773338	11.68478113	-35.91819327	-8.56972988
am124	IP	BARREL	0	1	2857.195	1.186104556	-0.777835796	7.019702418	0.782484661	-22.13251081	10.04247241	33.12625084	22.05428529
am124	SHF	SCISSORS	1	0	1842.5764	6.588259429	1.962652215	-9.009257793	8.084026406	-35.87624373	-27.57864098	-18.50529247	-18.21274226
am124	IP	WOLF	0	0	3315.3488	-1.240083784	-0.718096723	1.937393606	-3.271292714	-14.57705482	13.7605428	11.91877669	15.40248639
am124	SMP	OTTER	0	1	3225.0553	3.008665119	0.815005171	9.091054817	17.79634688	-2.610649321	-1.69627772	-9.983315504	21.01709631
am124	SHF	SHOWER	1	1	2365.9796	0.167813268	-0.8157305	5.202007709	0.296736479	7.278041282	2.131468758	14.26407737	11.01627352
am124	SHF	BONE	1	0	2843.5842	2.046013186	1.012861091	-5.861403838	-9.329515154	-3.979326369	-11.98078005	2.167118187	-1.501723313
am124	SHF	FLAG	1	0	4190.002	4.37287535	2.601722197	-6.433273646	-0.783246298	-17.43288837	-38.64002372	2.006498705	-4.281358633
am124	SHP	BACON	1	1	3278.0057	5.067005053	0.725954477	-2.310812559	-10.14650751	18.79880134	-7.222250149	-2.472676541	8.111838084
am124	IF	TAXI	0	1	3347.4418	-2.262689123	-0.495178638	-1.654706217	-14.76377365	-8.591874245	-25.52911393	28.10242087	29.45713234
am124	IP	BOWL	0	0	3636.1838	-1.169634734	-1.981524032	-6.536581482	22.38472362	-22.41166999	-24.75803638	-44.62490783	-31.9484472
am124	IP	NET	0	0	3663.7503	0.605090868	2.316345525	2.587982657	-1.743923791	5.4686056	19.39141866	-2.10344727	9.328764971
am124	SHF	SYRUP	1	0	3603.5852	-1.103436327	1.988041538	4.921363493	25.99873929	-18.20231365	-20.19523571	-20.37592788	2.323302907
am125	SHF	OMELET	1	0	2458.0409	2.715111373	0.155390205	7.601545649	4.270419114	4.713451042	13.30673427	5.734278519	23.60614891
am125	MP	RABBIT	0	0	2195.0271	1.23666592	-0.145979122	7.418258406	17.39461668	-6.643837612	17.54594725	-1.939812412	-3.140243001
am125	SMP	LION	0	0	3598.8914	-0.31380087	-1.912556876	17.04879723	28.05936014	8.987334147	4.68080665	8.240994139	13.05050835
am125	SHF	CANE	1	1	1927.6177	3.422855033	-0.487138925	8.060370085	7.915035338	20.35720551	6.236013291	-7.788211066	16.76837077
am125	SMP	SWORD	0	0	2648.0962	0.959606831	-0.112514968	8.601463308	18.14981937	15.28272214	-21.63912225	-0.345358934	3.258842315
am125	MF	FORK	0	0	1967.3591	-1.098385539	1.294722275	-1.480542409	-4.307457436	-3.400523557	-4.235948545	1.889164015	10.11021421
am125	SMF	ARROW	0	0	2549.4221	-0.325256503	-2.036699903	-11.63181024	-31.9582936	5.398706336	-4.916814983	4.414736354	8.104698175
am125	IP	TRAY	0	0	1906.335	1.981533434	0.298727365	5.30156433	9.00905322	-10.48854076	3.005017946	23.73970073	-12.37571918
am125	MP	PHONE	0	0	1869.2601	0.953760565	-0.543867948	-16.76479013	-28.84732261	-23.00412775	21.29821197	-3.864174801	-16.22897591
am125	IF	SOAP	0	0	2924.6734	1.778103561	1.192853815	19.53399126	36.15931918	9.550847356	-7.2189538	11.29278681	9.004050928
am125	SMF	NEEDLE	0	0	1639.2587	1.928875556	1.119665507	8.73945755	13.35246664	9.087804366	-21.46299985	13.80981283	10.07349925
am125	SHP	FAN	1	1	2664.6136	0.920908426	1.529218069	-5.926035557	-18.58629322	7.141684019	-7.717029819	-8.791966839	29.95532464
am125	SHF	BANANA	1	0	3398.0271	1.417289274	-2.706056135	4.124641515	-9.07375053	31.19773791	9.746814183	-13.28997673	36.26687457
am125	IF	CLOCK	0	0	1955.3258	-0.286320173	-0.01196381	4.166552757	-4.83553213	0.226180306	7.216537494	31.74457251	-2.777495907
am125	MP	BENCH	0	0	2276.4554	1.287617997	1.318939143	3.308785689	-1.667872454	0.566646717	6.689975083	10.21968672	12.99989908
am125	SHF	FLAG	1	0	2775.5101	-2.968140961	0.293791629	-7.823054919	-12.37926651	10.34961044	-1.594981492	-19.82243613	-5.512698902
am125	SMP	CAMERA	0	1	2659.6255	1.019490613	0.72322805	-1.144198027	-13.37100821	1.998751443	24.36928338	7.530873808	3.550903016
am125	SMP	CANNON	0	0	2298.788	-0.145829664	0.661667684	-9.624635068	-22.03662253	-1.875645451	-11.45889041	5.091218963	4.242018428
am125	IF	BASKET	0	0	2476.405	-1.090885408	-0.222591549	15.60273491	27.95278936	16.96738884	6.102424774	-2.917411112	4.118884332
am125	SHF	HAM	1	0	1471.2186	1.873526069	1.480378673	16.35878338	18.10163423	9.847882494	10.26442781	22.06756324	16.41894822
am125	SHF	WOLF	1	0	2263.5918	0.313169964	1.389603525	12.45522657	21.34640173	2.556177366	-6.399235241	11.14723027	13.61048569
am125	SMP	WHIP	0	0	2495.2701	3.110867276	1.43568209	1.28903496	0.982418689	-10.87577588	1.828499506	8.939290998	9.421530787
am125	SHP	ENVELOPE	1	0	1795.19	1.799661645	3.733480449	6.121526138	13.32464555	-12.4468723	-8.829190125	13.96731014	9.296553078
am125	SHF	STAPLER	1	0	2241.6029	1.125668556	-2.439289927	-6.483016988	-12.71064762	2.286482948	1.163238462	-3.161060706	-9.102906896
am125	SHP	SYRUP	1	0	2042.4527	3.896596097	2.348791264	6.995155965	-2.842845406	9.867528126	10.16016842	17.09706533	21.68083667
am125	IF	KNIFE	0	0	3003.9747	0.989538959	2.545919276	-9.44824219	-3.318359846	-22.11204068	0.569640641	-8.799698347	-23.75882432
am125	SHF	BIBLE	1	1	2191.8224	-0.621872414	2.554199105	2.503360146	8.642249583	6.019194454	-6.812231363	-2.341334433	-10.97345722
am125	SMP	PYTHON	0	0	3368.3731	-0.407533943	1.958976515	-13.71107303	-24.01784651	-16.13375582	8.204739586	3.381772817	-18.30335696
am125	SHF	UMBRELLA	1	0	1705.7327	-1.416653341	0.557240923	15.08670163	17.83753605	4.28957161	34.57293332	12.18663572	8.199875553
am125	MP	MOUSE	0	0	2228.6946	0.765731393	2.91108623	-19.97634521	-37.65540621	1.854392923	-2.106023849	-26.11326883	8.019400823
am125	SMP	PENCIL	0	0	2946.1435	0.505301467	1.407370501	8.205709799	1.007568067	10.13966665	-11.86828571	12.12129898	46.84244956
am125	SHP	ANCHOR	1	1	1592.7052	-0.853751914	-1.355627812	9.754881208	10.99958065	6.23917722	-3.286484647	27.05270354	-6.256647666
am125	SHF	HONEY	1	0	2067.8008	2.665466509	0.78472344	4.659265369	-2.595867827	25.9269724	-17.82627389	1.169912081	25.96728749
am125	SHF	PLATE	1	0	2069.0999	-0.076652611	0.561879323	8.399564262	7.478351884	10.33339955	33.51739749	5.8123565	-11.03123538
am125	SHP	SHOVEL	1	0	2084.7579	2.232107809	0.148084113	-7.072428919	-17.18263931	-5.927093331	15.22273261	-10.85480998	16.78946294
am125	IF	CHICKEN	0	0	2052.1187	0.762998972	0.471647843	10.40406739	12.4186373	14.15691311	5.333012543	2.88721172	13.67199373
am125	MP	JACKET	0	0	2275.488	-0.165479347	-0.917176961	-13.1822087	-27.73402847	0.215001001	-32.67412366	-3.892689131	26.19863689
am125	SHF	HIGHWAY	1	0	1737.5158	-0.11716043	3.683364681	11.90996345	12.35322851	-1.072543162	9.996326192	17.82901123	23.71230231
am125	SHP	TOILET	1	1	2863.9331	-1.825421779	-0.792824567	9.482226882	7.61103779	20.22651413	10.40215626	6.377404175	3.385584323
am125	SHF	MOON	1	0	1631.4224	0.646115374	1.824516776	-10.44980265	-15.70011589	-11.46879175	-4.01188461	-2.774083157	-6.815042691
am125	SHP	SEAL	1	1	2025.6753	1.706841993	-0.108963564	10.97187409	12.595204	9.211042612	-1.227769326	17.93724494	7.29091994
am125	SHF	LIZARD	1	0	2406.8473	-4.72744185	0.197841611	-2.781461856	-3.385422839	10.73506179	3.383472521	-14.12009211	-9.700504718
am125	SHF	SOUP	1	0	1941.2171	0.590892276	-2.39329064	12.84603457	28.65947571	8.592760372	-4.801240021	3.106206075	-10.29785614
am125	IP	STRING	0	0	2012.317	2.121956385	1.005091551	1.714927155	3.196488899	6.541227394	12.63598913	-5.509160047	-10.64985819
am125	SHP	OTTER	1	0	2680.7115	1.390352276	2.689521013	1.513310039	-5.809717756	15.04830188	-8.822987855	0.07508101	20.84325836
am125	MF	LOCKER	0	0	1912.6401	-2.957311862	-0.155006837	-4.725411007	-3.290413187	-1.623205139	-16.58141873	-9.437807421	3.767300418
am125	SMP	ROSE	0	0	2137.7099	-3.487288602	-3.107942253	-0.470813919	-11.37714206	-0.808737982	2.494611136	5.461755337	31.24809883
am125	SHF	BRAIN	1	0	3031.0545	1.590364477	2.198476728	0.687490585	-2.845660993	0.271537986	4.377103727	8.159038988	-0.633354289
am125	SHF	PAIL	1	0	2228.8149	1.117867217	-0.579323939	-11.62291729	-24.35422173	-2.875191599	4.143203087	-3.132232124	-4.563525112
am125	SHF	BALLOON	1	0	3203.8888	-0.965566041	1.271890064	-4.679508651	-14.12183918	-1.692703617	5.475400704	0.481931713	9.874279314
am125	SMP	KITTEN	0	0	2617.3113	-2.62620854	-4.278238455	4.582950315	13.49055742	-13.93603581	8.372972706	12.05506496	-16.73246193
am125	SHF	OYSTER	1	0	3067.8501	0.745613788	2.60206558	20.24173	32.5853298	0.643358624	3.551053879	24.62245744	11.94034047
am125	IP	BELL	0	0	2365.2425	0.500820859	0.259733878	-2.885423988	3.431814397	1.011873177	-13.92192399	-12.11598404	-8.575861795
am125	IP	BOOT	0	0	3264.3773	-2.194412714	0.297038499	-4.959692925	-10.71452128	-14.19730846	10.51756729	6.329861774	-0.373526678
am125	SMP	PIE	0	0	1789.4829	1.009528262	-2.08788445	4.98393618	5.69704685	13.12825805	-2.715496564	9.3428217	-11.58838342
am125	SHF	PAN	1	0	3515.7948	-1.130292775	-1.048106926	-10.30956749	-15.78938004	-10.62060908	-8.360296199	8.378125799	-21.38115425
am125	IF	RAILROAD	0	0	2938.4775	-1.472585058	-2.036158376	8.246813722	14.17444013	4.079092599	-2.393359704	19.09533324	-16.94257619
am125	SHF	CIGAR	1	0	2782.7247	5.276153356	-0.216933551	6.064303288	14.28956075	8.944728259	-11.52966863	0.26326959	-5.140812426
am125	IP	CAGE	0	0	2527.0744	3.611247981	1.021654747	8.881917885	1.795473832	22.79954086	-1.128641171	14.51741107	14.22483507
am125	IP	STOOL	0	0	3363.6363	-0.550245151	0.750855641	2.443460018	4.350157087	-0.887944371	-2.470297638	-1.14520282	11.21237406
am125	SHF	CARROT	1	0	2479.5255	1.684270009	-0.074312761	-6.388118595	-11.97828753	-13.82636067	-5.742531852	-2.703874775	21.8421947
am125	SHF	CAKE	1	0	2040.66	3.218644246	2.530069708	10.18494426	25.11256263	1.731224297	-22.81969653	7.23421595	0.979198383
am125	SHF	ORANGE	1	0	1574.7554	2.81030288	0.283623547	-5.04839807	-7.966757385	-18.38419589	8.016840731	7.533967424	-4.918360977
am125	SHF	VIOLIN	1	0	2556.7661	3.137578207	-0.936487759	0.128908027	-9.281750744	19.94617852	3.184543575	-8.956543302	17.42064714
am125	SHP	TURTLE	1	0	2667.2297	1.774328975	-0.61898074	10.82023322	17.46099019	10.42825208	-6.267303277	11.63705435	-0.248204414
am125	SHF	CRADLE	1	1	2229.2913	3.199087932	0.283324326	-2.007362627	11.23671999	-7.048620704	-22.47877933	-13.3214314	-8.004964202
am125	SMF	FENCE	0	0	2875.8117	-4.212941225	-1.836269956	1.767240325	-16.12586181	19.4116897	8.526678455	18.71381508	9.04258791
am125	MP	NEST	0	0	3407.4676	4.187563516	0.544873606	15.86207088	22.48890546	18.65722266	3.424799455	-1.396296282	25.82745379
am125	SHF	PURSE	1	0	1880.6565	3.449343079	2.367815263	-1.53574414	-7.326950669	14.2811257	8.031033775	-8.724754072	-1.703766736
am125	SHP	HOSE	1	0	3084.8758	2.247720772	-1.648967357	-4.946752822	-2.628960066	-2.734649292	-20.29609835	-6.260108639	-0.947138523
am125	IP	PARADE	0	0	3295.9671	-0.806310461	2.407893769	-4.62661855	-10.07423297	-2.18558197	-6.520934816	8.726514064	-7.634819581
am125	SMF	TRACTOR	0	0	2042.7565	-0.705081977	-3.200522279	-2.744604843	-13.46266223	8.706376493	7.621815268	10.02174083	-10.44989333
am125	IP	TIRE	0	0	1837.3898	-0.391988348	0.843221006	0.956180823	-5.701142596	6.553344243	0.35301566	1.672916353	17.8460563
am125	IF	GUITAR	0	1	2657.7823	-1.216632999	-1.311951844	3.910271936	-1.216615771	8.939840557	-2.910723878	21.42665127	-7.08509222
am125	SHF	ELEPHANT	1	0	2806.1859	-0.021797068	3.120275102	-3.464806827	2.0511187	-6.446518732	-16.39738828	-5.078603249	-5.498599904
am125	SMP	BUTTER	0	0	2523.929	2.303895071	0.98800834	2.884223338	10.25464139	-2.00289933	-2.220865383	-1.185422251	-6.838384426
am125	SMP	DOLLAR	0	0	1487.4799	-3.20007451	0.351368305	-8.813094726	-1.247914439	-33.80098101	4.234076583	-1.292694361	-22.85635689
am125	SHF	MUG	1	0	2298.1428	2.84771973	2.478071041	0.454979952	-12.67916731	16.15809221	17.96625622	-8.38910952	25.33163737
am125	SHP	SPONGE	1	1	2636.1629	1.140217996	1.950926842	0.238320311	5.613960168	4.770751355	8.497770333	-12.65124028	-15.14937083
am125	SHP	ROPE	1	0	2314.0616	3.834088834	1.198337976	11.04218832	12.37449055	9.662306521	12.48768319	15.98229122	-1.857904454
am125	SHF	WINE	1	0	2209.1063	-0.402235581	2.435688409	7.924377683	6.180989391	9.625141082	19.53108179	2.764212619	9.686153678
am125	SMP	TAXI	0	0	3713.996	5.160425886	1.031777523	-11.07305361	-9.083052919	-14.44413483	-24.76048318	-18.86595513	13.09447894
am125	SHF	GOAT	1	0	2248.7917	1.275317736	-0.284751062	20.52881558	21.78786741	43.71331715	-5.258151077	12.96137216	14.30484332
am125	IP	MAGNET	0	0	2942.1299	-3.16469358	-1.024596816	-0.349126093	-6.179886002	17.18951872	2.493388953	-2.529793184	-5.289194018
am125	SHF	NAPKIN	1	1	2413.5062	2.235919634	1.122705672	4.502103865	7.372280188	-0.527666582	-18.96735057	14.31541039	7.326976467
am125	SHP	CHEESE	1	0	2211.0115	-1.465754821	-1.736604514	-21.1760975	-31.84339658	1.03888658	-20.83012306	-24.03842759	-10.82738322
am125	SHP	DRUM	1	0	2492.8539	3.285382036	1.213334631	0.241313689	-6.944210243	13.30891677	3.564593184	4.373718809	-2.93028827
am125	SMF	LADDER	0	0	3299.6227	-0.620757217	-4.541389776	-16.08634764	-15.74689916	-26.180728	-32.33094774	-1.407434149	-9.794564141
am125	SHP	ROCKET	1	1	2565.627	1.916414896	1.234932687	-4.361148442	-5.546766017	6.963890902	-20.98227	1.873950778	-13.16283796
am125	MF	DIAMOND	0	0	2789.0939	-1.355710914	0.340091521	2.240300721	10.31770815	-14.50462924	-9.726733194	11.01577033	-5.666845834
am125	IP	FLASK	0	0	3215.4033	1.268726345	0.769826099	-3.436904887	-11.17173133	-4.933575065	-3.676020197	1.815831885	21.65745405
am125	SHF	BOWL	1	0	1885.8493	0.458820855	0.629331609	12.73221386	30.70954791	6.370650191	-20.67853746	13.11224181	-17.62797043
am125	SHF	TRUMPET	1	0	3205.3963	1.761447648	1.484084429	21.46664787	38.70863619	10.51144804	17.15287216	-5.760079308	20.74534077
am125	SHP	SPOON	1	0	2543.7669	3.098876073	0.785648376	8.432191518	12.14706523	18.65566975	0.64050435	2.060610036	-5.389134849
am125	SHF	PILLOW	1	0	1832.5347	0.267777407	-0.745077911	0.692972335	13.20498215	-8.423314918	-17.92279762	-6.693058066	-3.984421598
am125	SMP	MILK	0	0	1479.3942	-3.469136037	0.254794077	11.87031112	27.81313254	-7.461866387	9.586783992	19.98187597	-31.76312876
am125	SMF	KETTLE	0	0	2406.0925	0.506662304	-0.441769107	2.368485874	-1.0801324	3.701666531	-5.109616667	19.26889521	-7.513248069
am125	SMP	DOLL	0	0	1755.9298	0.692839031	0.113755129	16.85016049	26.08757659	2.054561702	3.377276484	7.553621968	33.26311575
am125	SHF	NET	1	0	3195.4881	-0.740083382	1.429924811	4.068226814	-10.12512326	24.0467848	-10.91966403	15.87956174	22.26060713
am125	SMP	DEER	0	0	1895.9463	-1.847606885	-0.06625387	-3.112338272	-12.76969464	12.85594656	-13.18691758	-5.675139954	23.23747443
am125	SHF	QUILT	1	0	1527.6793	2.533754637	2.012758824	10.26104014	5.699361468	6.693487197	2.875475773	16.17788535	31.78242491
am125	SHP	CANDLE	1	1	3501.2235	-0.619058124	-0.078886981	3.37540924	-0.861940378	13.79921984	-7.864622513	-0.866000604	21.10864295
am125	SHP	PENNY	1	1	2958.3913	-1.654663906	0.489058743	7.266584107	-0.495613772	21.4671166	1.633238833	8.015500557	18.96864059
am125	SHP	SOCK	1	0	2863.2386	3.600604036	-1.507880043	-4.915629777	-22.70425326	12.20067041	20.96930367	6.477810351	-6.217289874
am127	SHF	SOAP	1	1	2441.1882	3.985167584	-0.448346452	5.395601738	14.1648409	6.462543864	-6.998549106	-3.527493354	-9.148607323
am127	SHF	DUCK	1	0	2868.4865	1.844175214	-0.522574827	3.147880297	-3.115224252	9.792747939	9.622351714	17.56299134	-2.3641763
am127	SHP	STAPLER	1	0	2671.1552	1.301081457	0.272081251	14.65142146	10.66993541	21.92822819	1.330370102	11.11550576	37.53833923
am127	MF	SHOWER	0	0	1957.2681	2.444504042	0.160668152	-17.493141	-12.32501239	-24.93551886	-37.63416781	-14.2660218	-24.28677186
am127	MF	WALLET	0	0	1866.7038	-0.707968681	-0.591135062	5.613668887	10.53130277	-28.46210111	-13.21675849	0.250599387	32.06119283
am127	SHP	ORANGE	1	0	1457.2379	1.558634481	-0.458596522	-13.45603625	-16.28468679	-31.70789493	-17.35656972	-0.660764423	-4.372497504
am127	MP	MUFFIN	0	0	1730.9271	-3.613104735	-2.737529468	-7.723788899	-10.65526559	-2.064138467	-13.55769171	-0.78494803	-7.230193838
am127	MF	STOOL	0	0	1452.4411	1.636271649	1.554403395	8.137237212	11.55009929	17.22803045	11.51752644	-10.38741709	12.46481539
am127	SHF	CANE	1	0	2167.1973	0.189921084	-0.422708305	-6.231023208	-13.95473389	-17.95178959	-1.536260903	14.2866802	0.479742951
am127	MP	DEER	0	0	2157.8704	-1.746090641	-1.712206	-0.070234592	-5.553594178	6.938061226	3.912735765	-2.902784689	17.43208428
am127	IP	FAN	0	0	1367.7193	-0.166407112	-0.930678384	-5.263735423	-5.203889851	-19.00340657	-12.49141766	18.83820363	-25.16061701
am127	MF	HOSE	0	0	1774.1853	1.039357441	2.817873015	-13.79223841	-18.89749966	-19.37531492	-9.247749372	11.22262465	-28.38785732
am127	IP	PAN	0	0	903.6091	-4.144894114	1.78850475	13.4754029	11.5364544	58.24528372	-12.72667065	0.042459323	21.29717096
am127	IF	CAGE	0	0	2646.2309	-3.887711224	-1.809149303	2.38313241	1.426801933	-3.654758515	-0.496836354	10.19099588	1.2786287
am127	MP	ANCHOR	0	0	2142.602	5.201088273	1.662500123	-22.93344618	-24.74738963	-19.86093752	-2.870811277	-18.98872578	-36.02760094
am127	MF	ROSE	0	0	1975.397	-1.281469073	2.121578066	-2.065812608	-5.854765654	10.04186273	-25.78511551	11.42268623	-1.927676871
am127	MP	BENCH	0	0	1187.9817	-0.119965841	-2.053996054	-32.26772025	-34.63223888	-46.01643724	-28.32976176	-19.38981338	-33.31593865
am127	MF	BANANA	0	0	1380.6237	-2.519191104	0.146208238	3.089675618	7.30920632	-21.63095909	14.0156923	0.649426694	2.874945246
am127	SHF	FLAG	1	1	3147.3586	-0.38504623	0.000649429	11.38964912	11.14136375	41.13053551	6.208302776	-2.298046622	12.05811456
am127	SMP	NAPKIN	0	0	2895.0911	3.129540877	0.021901202	-1.389588216	9.435489852	-17.48334921	-8.138619473	-8.838251254	-16.0894753
am127	SHP	VIOLIN	1	0	3315.1055	0.164177211	2.082004821	19.38730072	18.56715908	22.55325905	49.99920103	14.69582282	8.451501793
am127	MP	DOLLAR	0	0	1589.8147	-1.805714927	1.411735858	11.97280097	11.88691371	5.746511585	44.02271844	2.537782114	11.44941532
am127	MF	SOUP	0	0	1163.6247	-1.493658483	-1.589008972	-13.00777388	-11.24494411	-11.02240522	-1.046570235	-15.11311486	-25.55028185
am127	SHP	RAILROAD	1	0	1412.6615	-0.111271891	1.965608176	2.070791766	14.1420705	-30.81526441	18.40477161	-11.10930955	-10.04664172
am127	MF	DESK	0	0	1224.2572	-2.05974514	-2.55293143	-11.82570442	-10.93947545	-4.736903022	-16.03174385	-12.47091922	-17.31313233
am127	MP	HOOK	0	0	2002.2693	-0.367665132	2.111069439	17.76706604	11.68599867	25.263678	22.03819873	22.27691796	26.46769462
am127	SHF	LION	1	1	1453.9029	3.707725104	-0.859790096	7.747838648	11.1815575	26.08292616	-1.868596451	3.756978382	-8.289821632
am127	SMP	ENVELOPE	0	0	2487.1814	2.654515877	1.787278807	5.82103543	11.27176542	16.33462653	-6.954679731	-7.604019693	3.51558542
am127	MF	BARREL	0	0	1327.1228	-1.530347255	1.858219749	-6.86749015	-7.208642186	0.688113987	-11.45358302	-4.607493908	-11.9099911
am127	MP	COUCH	0	0	1578.7188	-0.501591115	0.598204962	-18.78854563	-13.43777322	-30.08522627	-8.822416149	-27.02483661	-24.90260395
am127	MP	HIGHWAY	0	0	1275.7836	-7.31917419	-0.900960326	-26.33971541	-28.44249918	-26.05163696	-16.73193573	-17.91356287	-36.31264798
am127	SMP	GUITAR	0	0	2539.1155	0.774253241	0.019696442	17.81723924	22.76334945	14.88720208	4.697760714	18.30646919	8.09639213
am127	MF	PURSE	0	0	1865.2057	-0.240105614	0.112597028	-4.564948929	-10.41658815	15.48325633	-11.62163553	-3.950961437	5.911828645
am127	MF	FORK	0	0	1282.2031	-4.694137878	1.355936172	-6.353875467	-15.07271458	-28.41005524	-4.440473605	25.8790796	-2.940617814
am127	MF	ARROW	0	0	1130.6719	-0.382098074	0.525103084	-8.614274017	-4.736076599	-9.499421509	-1.171910618	-16.05241527	-16.73819031
am127	MP	NET	0	0	2213.5849	3.324670662	-1.246714679	-5.930416448	-3.249392639	-0.448118524	-29.85265603	-6.086334409	-5.978268333
am127	SHF	PAIL	1	0	2310.3667	5.3232266	0.537138404	11.08051509	12.79358736	16.17074959	-16.03030789	-4.20972591	38.79000242
am127	MP	BALLOON	0	0	1808.332	-4.59579058	0.121049037	31.69436889	34.6445775	46.10357829	35.18897619	15.78140998	29.85627009
am127	SHP	WOLF	1	0	3359.4333	0.391447083	0.630027844	5.377306826	2.564526818	-4.23237703	26.94737286	-1.24312089	20.3101757
am127	MF	TOAST	0	0	1333.7307	-3.137689894	-0.772705015	-4.532373061	5.851255706	-31.29282112	-12.40261968	-12.03979643	-8.473036982
am127	IP	CORN	0	0	2879.8434	2.482491141	1.002611571	20.69436179	25.25110508	8.907573021	-2.065933481	12.41904447	37.77692213
am127	SMF	BONE	0	0	2100.2264	2.19250045	0.7985141	7.594128673	5.973802642	24.84501716	2.079571346	12.73386225	-3.606902972
am127	SHP	OMELET	1	0	2127.2063	-0.915153653	-1.593328718	-7.505937634	-1.480143907	-11.15209158	-13.83070771	-8.252186211	-23.16568366
am127	SHF	MANURE	1	1	2176.1819	5.882456546	-0.011264488	28.25211298	37.71155531	24.38266655	11.65926231	6.063958093	36.48256665
am127	SMF	HAMMER	0	0	2159.8609	-5.04362896	-0.187499414	9.951830961	9.185378234	-10.36132168	-2.475716875	18.67223667	23.63130232
am127	MF	MOTH	0	0	1951.6386	0.400638389	-0.119841565	-6.060849029	-11.9526533	-22.44517973	-6.642528957	10.56870817	5.937580118
am127	IP	CAKE	0	0	3407.92	1.873061893	-0.432214404	-11.02248202	-15.85315322	-7.912258674	12.91713098	-2.176465338	-21.83124906
am127	SHP	STAR	1	0	3220.1758	5.975004186	2.347143072	2.87281221	-2.458730226	19.52713783	-9.40545059	12.99034363	3.432198086
am127	MF	SPOON	0	0	1250.3477	0.261875682	0.498220525	13.81712008	14.30583737	13.29960696	23.39937361	-1.484178881	28.5829741
am127	SMF	MUSTARD	0	0	1989.7849	-0.947376222	-1.537682763	7.050072734	4.61997265	15.50656762	17.01396248	-2.462784708	17.60299831
am127	SHF	BRAIN	1	1	1297.2898	5.335613566	-1.036244905	14.53137112	12.81988917	4.831744981	-1.357934929	16.60137479	35.28194609
am127	SHP	PENNY	1	0	1958.6831	2.723284599	-1.536612911	-28.18871248	-36.86224477	-31.83380945	-52.0626251	6.791408292	-27.70353559
am127	SMF	MAGNET	0	0	1981.5594	4.061434681	2.199250347	-13.46456376	-15.9361607	-18.7125087	-1.590230856	-1.532660386	-24.11389306
am127	MF	WINE	0	0	1942.9842	0.582079248	-1.032534369	-24.10357685	-30.64543123	-30.77565877	1.506483387	-1.208502892	-41.89838956
am127	SMP	HAM	0	0	2202.3797	-0.040860289	-0.567422871	-7.396704168	-4.144990778	-5.421961986	-34.42123636	-9.626791729	-2.081750254
am127	MP	UMBRELLA	0	0	2345.9569	-2.007807211	-0.856324317	-0.772543918	-5.772596462	12.17150601	-6.075374864	2.487396645	7.058868465
am127	MP	SHOVEL	0	0	2178.527	-0.067113218	-0.752227881	15.92901475	23.76092635	25.84841909	11.43365317	-0.327984631	3.946442418
am127	MF	BADGE	0	0	2094.7171	-1.733550997	1.200432536	-8.07815379	-10.47073166	-13.29518445	-34.78874273	-0.349286577	10.19408891
am127	MF	LAMP	0	0	1668.7224	1.47849815	0.250379429	-2.352460344	4.725106867	-41.03241652	1.670546061	-15.65386812	16.97742931
am127	IP	SHEEP	0	0	2027.1378	-1.390815383	-0.29168584	2.413301387	-2.032802017	23.81112519	-7.184889462	-9.631957746	26.13757705
am127	MF	PAINTBRUSH	0	0	2203.5372	-3.968959344	2.350319142	15.48955386	17.3530513	0.009741222	44.32411018	18.61319985	-1.5447785
am127	IP	RABBIT	0	0	2057.0298	-1.215052532	2.857776678	-4.026857811	-14.86948258	10.81280587	18.43492098	-6.622488169	16.72230601
am127	MF	MAP	0	0	2066.5656	-1.740573423	-0.434389709	-6.752542037	-14.79440164	-5.263877275	-23.04689424	5.352616325	15.65711729
am127	SHP	CAPE	1	0	3029.1654	2.318309762	-1.538174285	15.81747383	17.62606833	-12.06138982	30.78266865	20.0533903	15.37006525
am127	SMF	CAMERA	0	0	2515.7825	-0.555143185	-2.195077813	1.871170576	-3.046663748	-2.641709959	-10.64820237	10.12398183	20.10220813
am127	MF	PILLOW	0	0	2783.4578	1.778922526	0.15145494	-2.951409841	1.547039485	-18.38607874	8.853775308	-11.85085951	-2.696015848
am127	SHF	CANOE	1	0	2231.8819	3.429299147	0.345943743	17.55041752	20.17204846	29.1448596	1.920163533	0.709157436	32.01057974
am127	SMP	BIBLE	0	0	3387.1196	-1.988035179	0.667144735	6.359507802	4.614118832	6.124763901	-2.776441883	11.62471062	11.22748172
am127	SMP	JACKET	0	0	2190.2202	-1.3466784	-0.232633482	-12.91767887	-14.51887365	9.916108596	-11.12129267	-20.61251891	-14.45603832
am127	MP	CROWN	0	0	3287.3383	3.772568851	0.570406658	6.708589726	5.852029593	4.228019346	2.41128103	-2.266380588	27.45899689
am127	MP	TROPHY	0	0	2893.2036	-1.457007549	-0.484518617	-1.741558087	-5.608121748	-0.550208842	-7.768781635	-1.656416516	15.83067245
am127	MP	BOWL	0	0	1361.922	2.526038421	1.133660597	13.27262044	19.78653278	28.88970705	-0.27446293	-3.710920948	8.463391304
am127	MF	CRADLE	0	0	1867.5824	3.108618201	3.507479081	10.45684796	19.29933959	-41.66442627	-12.0406995	14.53056619	24.32803772
am127	IF	MILK	0	0	2350.6801	-0.271268021	2.08247151	-16.46520786	-19.97604737	4.400071745	-30.87079841	-8.415552073	-21.98388626
am127	IP	POTATO	0	0	2233.6661	0.930826339	1.197415453	0.130119361	3.294644969	5.837300975	-18.03668581	-7.742225189	5.676683311
am127	IF	BACON	0	0	2111.4263	-3.710940217	-0.829713256	17.88066867	24.12595875	20.54033888	46.75143719	-8.734669317	12.53546604
am127	IF	GLASSES	0	0	1700.3729	2.521077544	-1.391262421	-1.927190421	-5.329635828	-2.603574909	-46.01386981	3.592450038	30.36212665
am127	MP	LADDER	0	0	1936.4661	1.641469282	4.06728143	20.79315769	28.92099555	42.12529486	4.012037023	-5.692159241	20.90341136
am127	IP	ROPE	0	0	2546.363	0.352157479	-1.584606042	8.550592991	11.87316684	30.22327812	13.10992524	5.386887741	-19.36445788
am127	MF	TRACTOR	0	0	1578.629	0.295568558	-1.400249831	-8.613700823	-8.691363882	-16.92305874	-14.586114	-4.872726999	-3.648348762
am127	MP	SOCK	0	0	2138.4957	2.43535955	-2.930885443	-14.65994578	-18.8636466	9.545427643	-10.3174004	-13.07646324	-22.05495923
am127	IP	OYSTER	0	0	3278.8712	4.961325858	0.732724102	-2.896964985	-9.785422084	-15.3096847	31.4655933	-12.78639583	27.03288787
am127	MF	KNIFE	0	0	3676.9296	-1.415956183	-0.421878857	3.587356949	3.748270892	27.17703014	9.338185118	-17.38222702	11.35438843
am127	MP	CHERRY	0	0	1745.5754	-1.786658452	-1.844812508	26.44325938	23.29870238	28.33630078	24.36685483	28.6223613	35.28060564
am127	MF	SCISSORS	0	0	1452.7821	4.392521073	0.37504734	2.814020148	-4.46684947	11.69947612	12.0113969	8.140038415	10.95174516
am127	SHP	MONKEY	1	0	2266.9303	6.127830738	2.637008242	19.7112716	19.28683723	39.68689818	-9.051631161	7.051298076	41.3524944
am127	MF	OVEN	0	0	1186.2758	-0.280077449	0.327634519	-2.25886198	-4.491848996	-0.758323303	8.71269247	8.191879032	-16.4028051
am127	IF	JELLY	0	0	1946.545	2.108625269	1.090080741	12.68978754	12.87333716	16.09066418	21.81495536	26.39778757	-15.88049789
am127	MP	DRUM	0	0	1754.8664	-2.589316566	-1.117958152	-21.67772319	-25.52171939	-28.34207386	-15.30340412	-14.80252252	-15.31879071
am127	MF	SPONGE	0	0	1299.1099	3.442054143	-2.749415645	9.5645538	12.8979035	-16.96668549	8.746233293	-5.355395905	39.21678085
am127	MF	TIRE	0	0	1996.9472	1.131632778	0.377433735	-1.37900626	4.050438706	-10.95161085	9.156548407	-7.964711562	-11.8557699
am127	SHP	LIME	1	0	2124.4757	-1.328886536	3.291500948	22.65387058	25.48394255	9.620287296	18.16171542	24.21154918	22.26479651
am127	IF	CARROT	0	0	1636.341	-5.317715872	-0.276130422	-13.22247205	-16.72513646	-20.94150056	8.370868148	-1.616048771	-23.3289436
am127	IP	SWORD	0	0	2266.2337	1.851063755	2.830383876	-20.35308459	-20.64948288	-20.56758305	-25.50760767	-20.26898186	-16.05822906
am127	MP	CANDLE	0	0	2516.8405	-1.914602614	-1.669370925	-4.385241045	-0.648221287	7.950621372	-18.26945054	-29.8870579	16.58711109
am127	MF	STRING	0	0	1398.6901	1.877817003	0.239142791	-11.35459575	-12.60084837	-1.406194931	24.55235731	-12.21728652	-34.60245239
am127	MP	PENCIL	0	0	1595.3226	-1.271588806	0.766170741	-0.596960404	-5.176223417	-1.719409642	-23.7355673	11.69780951	14.25526023
am127	MF	NEST	0	0	1956.5982	-2.858171798	0.599816677	-3.300923647	-7.946366754	-12.29754208	10.86165115	5.403865277	0.661956524
am127	MF	BASKET	0	0	2091.86	3.944474424	-0.509222747	2.344790408	-3.928075655	20.15715095	10.55859087	11.40484405	-5.145858297
am127	SHF	PARADE	1	1	2233.9231	2.948796491	0.410835308	28.10372518	28.18250053	33.05899693	1.732228151	21.69440978	49.03057726
am127	MP	PYTHON	0	0	2766.5557	-0.644162003	-0.617365882	3.956871497	7.91584448	-2.144183199	2.474532349	6.387252614	-9.263210909
am127	MF	DIAMOND	0	0	1088.0666	1.303437672	-1.295942356	-7.96693854	-13.75437955	-5.665984178	9.168787838	10.13109441	-23.66004175
am127	IP	TOILET	0	0	1640.9455	4.497949745	-0.028177611	11.77589494	9.900354384	22.46094155	30.36077301	-5.491575394	24.42249593
am127	MP	PIANO	0	0	1802.3954	1.645781504	-0.280463944	-13.62339462	-16.72156221	-34.37183653	11.98720024	-13.83964609	-0.575167333
am127	MP	PLATE	0	0	2041.5094	-0.174620024	-2.328407914	-0.358228223	-0.508340989	15.16714339	-11.88132671	-16.47092668	18.2789848
am127	SHF	TURTLE	1	0	2049.2462	-1.984521334	-1.372561593	16.97407119	24.64731006	-3.967077018	42.28650873	-1.235792775	14.4719564
am127	IP	SEAL	0	0	2479.3271	-1.047917997	0.24787892	30.86884641	30.84659099	58.32933022	13.3926937	16.66374937	40.57075339
am127	MP	BROOM	0	0	2681.0251	4.707728197	-1.332863163	-0.45540571	-8.716358211	8.086903517	10.38062918	0.662794425	16.82052295
am127	IF	KETTLE	0	0	2050.0629	4.235098377	1.950974595	4.814690327	4.479838875	27.45316065	-16.27447496	7.009717707	-1.954393964
am127	IP	MUG	0	0	2676.4949	-3.378517831	-1.945232849	-6.396397629	-15.10822463	-5.581786346	-2.227539431	15.56722585	-7.358369126
am127	MF	CEREAL	0	0	1710.1024	1.068383796	-1.539968236	-22.84084477	-29.15168642	-23.78254497	12.72635503	-19.55523403	-23.75028554
am127	MP	PIE	0	0	1785.339	-0.511789007	0.73570039	0.970364806	3.416888317	-4.920002007	-8.401301591	-0.955409649	4.466013159
am127	MF	CHEESE	0	0	2661.3745	3.555590052	1.79557244	5.019726773	4.643302649	-1.708529361	-8.096610098	6.085260111	18.06170166
am127	IF	TRUMPET	0	0	2036.1157	-3.803828098	0.892081968	2.187791819	11.59755598	12.61070577	-14.9299232	-9.260465593	-15.63575051
am127	IF	APPLE	0	0	2125.5773	-1.434683221	-1.121015851	2.907607295	0.890689635	9.329382149	20.31489932	4.401774763	-6.878203732
am129	SMP	DOLLAR	0	0	2656.034	-3.564055271	-0.124375565	-51.18431786	-102.7880815	-8.259363773	-2.487280803	-14.26726089	41.65598369
am129	SMF	TROPHY	0	0	2323.4076	2.118830696	-2.771737989	-3.861078574	5.066608655	-34.98320407	-34.47325347	-3.177435862	11.22487667
am129	SHF	BONE	1	0	3983.3454	-0.073084423	2.26020892	39.23860203	82.01038911	-6.09117276	1.083550862	-0.180270742	-18.4988271
am129	SMP	COFFEE	0	0	2365.8652	-0.672133505	0.562049934	17.96075455	28.82376246	25.09815942	19.2724498	7.877336984	-23.40395218
am129	MP	DEER	0	0	2627.508	4.186288633	-1.613836955	-19.1038354	-17.06924396	-59.76049054	1.774423211	-32.58582724	15.750223
am129	SHF	DOLL	1	0	4114.2128	2.843425662	-0.732122998	6.975385163	-2.406138351	32.79312896	22.35866649	-14.26258893	35.08595074
am129	SMF	PILLOW	0	0	3978.9558	-0.385941039	2.081153504	5.733951826	4.224995005	6.300520809	10.08325089	23.77078258	-13.67050898
am129	SMP	BRAIN	0	0	2416.6238	-0.57352621	2.606345622	-37.39474571	-69.54732169	-15.47022034	-25.25511779	-7.074888699	29.20837819
am129	SHF	CLOCK	1	0	3980.9408	0.494892822	4.889059747	-3.371797085	-10.11966874	-8.174727063	34.967301	-3.491070813	2.995939793
am129	SMP	RAILROAD	0	0	2751.709	0.595579529	2.632734899	28.60206539	52.5551829	17.82671232	1.225422086	-6.48371168	1.496656617
am129	MP	MOTH	0	0	1811.5827	0.034239841	1.19659171	33.26268791	46.10505959	37.74785329	39.07326687	20.457467	-13.51153655
am129	MF	BENCH	0	0	1710.6227	-0.836110485	-1.634748282	-0.190840023	3.662900144	-15.34983099	20.90128532	0.326993329	-16.303116
am129	SMP	UMBRELLA	0	0	3983.4353	-1.96685058	-0.148697744	-1.46478871	-9.558218302	3.510129732	18.58700185	14.8129424	-6.677987544
am129	IP	MUG	0	0	3512.6363	2.28529945	-2.321556554	-10.64026346	-12.48210492	3.824012651	-18.37857351	-4.436196542	-19.86308807
am129	SMF	FENCE	0	0	2211.6774	-1.298189243	2.130965559	12.78146595	11.75282933	9.25393626	-0.893035325	17.78339658	24.18026305
am129	SHF	BARREL	1	0	3981.5167	-3.308508891	-1.003951793	-5.72027334	-17.00098607	24.7215464	7.593426477	3.831723145	-10.63158431
am129	MP	PARADE	0	0	3980.5525	-0.378360884	2.266307134	-6.495418058	-20.01823705	17.0148392	1.016103631	-0.931891084	14.02914309
am129	MF	LION	0	0	3319.343	-1.648706028	-2.119577499	17.19627981	24.48017872	20.27107691	6.675131028	6.741886587	3.744858919
am129	SMP	SHEEP	0	0	3982.8199	-1.698335303	-0.415298843	14.46896929	44.00147152	-28.41721872	-14.42978961	5.343654151	-33.91853733
am129	SMP	HAM	0	0	2134.1907	-1.126879331	-1.501955789	-32.35826079	-54.02305704	-5.998953133	-13.19691441	-20.28429911	3.195650341
am129	SMP	CRADLE	0	0	2043.4022	5.020234322	-1.74068002	-0.614332764	-13.90875171	20.94960543	19.52426498	-1.571053741	20.05161453
am129	SHF	WOLF	1	1	1650.7901	3.740778122	-0.053133472	19.24709215	43.02360463	1.09471113	-16.71169518	-6.393165489	-5.11618742
am129	SHF	BASKET	1	0	1822.9522	4.328472944	2.344908698	-26.01542438	-40.11825103	3.802323623	-22.58161257	-11.75512071	-17.29034995
am129	SMP	KITTEN	0	0	3838.7609	2.135926859	-3.103877517	-13.0108582	-27.43504455	10.50156527	-2.33792192	5.911652595	-7.295286754
am129	IF	FAN	0	0	4353.647	2.411447987	-4.124280005	26.5778821	45.46923761	16.36894774	4.001753554	3.791848826	1.657449836
am129	SMF	TRACTOR	0	0	3983.7012	3.830682901	-1.578003001	35.3891268	51.51611079	16.18754225	19.08022216	13.41697498	25.83321431
am129	SMF	CANOE	0	0	2543.4741	-2.199489967	-1.412328801	6.409068414	26.7806056	-14.05314593	-20.53738172	-5.280784464	-24.75169588
am129	SHP	STAR	1	0	3984.0536	1.396425721	-0.248693521	-9.433868558	-9.215455773	-11.35495803	6.252765473	-11.13506567	-17.32857989
am129	SMP	PENCIL	0	0	3985.2735	-1.726628313	-0.27224871	-21.62411896	-49.51055618	6.702341516	25.60331519	20.31471408	-18.32262697
am129	SHF	BADGE	1	0	1858.795	3.543109551	-1.338306893	4.037780716	2.34892628	12.1210014	-11.2407815	12.99129634	2.626912185
am129	SHP	TIRE	1	0	3759.5108	2.140105145	0.065200782	0.596413254	-8.818701407	1.547976983	31.97404813	25.94754666	-14.04276312
am129	SHF	MILK	1	0	3193.0494	-1.235110604	-0.722912279	11.31388457	14.07386457	3.863155375	1.237537932	16.45881425	8.148644588
am129	SHP	FLAG	1	0	3089.0772	4.173616994	-0.475310539	3.756438096	3.767719711	-9.009739433	36.3317571	5.972177157	-8.857732825
am129	SHF	MUSTARD	1	0	2876.5973	1.026984715	-2.27770007	18.31450407	37.65578129	0.409887308	-15.24409715	0.931521947	0.475381114
am129	MP	LOCKER	0	0	3583.0914	1.778422486	-1.522391823	3.692959029	4.670961522	7.540034391	-3.864683528	-10.01886366	17.77025102
am129	SHP	VIOLIN	1	0	4120.2885	0.136538934	0.132071328	-12.65333448	-23.66272828	4.914682255	-4.143533883	2.724651931	-9.305443944
am129	SMP	SHOWER	0	0	2265.9784	-1.776174289	-1.016969152	14.27860682	34.71421447	7.37800555	0.154814627	-6.437902654	-28.96558518
am129	SMF	CANNON	0	0	2069.125	-4.824352804	0.148056084	-16.3989341	-37.10846205	-11.5566358	4.997294219	-7.350274446	39.27269969
am129	MF	STRING	0	0	3376.3554	-1.123631938	1.848778756	5.350164313	4.173697017	9.518231902	-8.88415618	10.26472966	10.00573034
am129	SMP	HOOK	0	0	3343.5401	-2.336556147	-0.0980011	-10.74040474	-21.74621136	9.453068663	5.496533119	1.768042286	-12.00731811
am129	SHP	DESK	1	0	3081.0074	0.25479197	4.237468842	31.41141875	44.56914706	24.71764225	16.3075325	11.39463631	18.27061235
am129	SHF	CAKE	1	0	2712.5854	1.54709969	3.862714811	7.574430451	16.67874694	-18.70340201	17.27334854	-2.590903924	1.922444218
am129	SHP	MAGNET	1	0	2057.3943	1.022118431	-2.86095717	-17.24029032	-32.01387063	15.36890813	-1.446540213	-3.13691723	-17.05356117
am129	SHF	MOUSE	1	0	2792.8846	0.675062512	-3.090706382	8.97883361	29.8653932	-21.69105608	12.5590885	-7.813712879	-29.11769802
am129	SHF	SHOVEL	1	0	3350.3264	-1.036628933	0.955811105	7.939592526	18.17232909	-9.212221607	-2.482485027	8.601224324	-10.87917699
am129	SHP	DRUM	1	0	2293.16	0.614092031	1.885281579	48.96255157	94.08532868	-2.400690867	9.464759549	-11.95590885	14.81586783
am129	SHP	TOAST	1	0	1775.2251	-1.76866412	0.369448835	-2.53564263	4.567354786	-13.06090568	18.98276243	-16.13918137	-19.99765465
am129	SMP	WINE	0	0	2773.765	-0.014006531	2.642321575	7.57604928	7.788679343	-7.711647687	14.3793395	2.526081119	23.70786496
am129	SMF	JELLY	0	0	3397.695	-2.039867736	1.543305255	-17.05209126	-34.02871066	-13.36923529	-5.450236551	9.992638765	9.015039494
am129	SMP	STAPLER	0	0	1915.3078	-1.238016221	0.685956905	-2.654510857	-2.038847703	-13.33960399	-21.42801148	17.31987213	-5.581295895
am129	SHP	ROSE	1	0	2195.2436	-0.493077154	0.444832481	12.42251451	21.97498291	-6.092711312	3.272410979	-3.839800867	17.67766994
am129	SHF	FLASK	1	0	2257.7931	1.210729969	-0.782334022	22.8088513	21.24087858	24.90932317	33.07270384	18.65487568	25.10269098
am129	MF	NEST	0	0	3312.9676	0.476629134	0.652454068	7.861506451	12.80350159	1.331780448	-19.92284887	10.66477295	9.930699224
am129	SMP	PIANO	0	0	2000.2847	1.371200024	-1.819995172	-4.96484419	-7.364683775	-18.38389842	8.807499432	-0.678826753	3.868051815
am129	SMF	SOUP	0	0	2633.2207	-1.737236522	-1.066193472	-1.802734844	4.797236639	-5.924445939	6.845259346	-17.43807435	-12.16581682
am129	SMP	ROCKET	0	0	2399.528	-0.089990147	0.987336823	9.717700828	18.26382877	14.09684793	3.156394482	0.829713545	-15.05480007
am129	IF	GUITAR	0	0	3930.4927	1.214623973	-1.400079715	-2.327890815	-7.099277838	7.297488415	-11.97051877	-3.743086638	16.33287899
am129	MP	ELEPHANT	0	0	3332.3646	0.878053684	1.712789138	16.24119412	17.38884419	15.14611124	27.48413119	8.400504575	14.25261864
am129	SMF	OVEN	0	0	1953.8924	2.758927101	-0.127425535	2.795053497	14.60241136	-16.24786164	-13.61358989	4.970151658	-18.33215659
am129	SHF	RABBIT	1	0	1575.9991	1.568282744	2.432946832	-30.84858341	-59.35002028	-18.66510433	-1.687955858	17.58158076	-3.727704129
am129	IP	ANCHOR	0	0	3365.7413	-0.900428927	-0.66748902	18.13463441	19.70748963	8.322537497	9.425424837	13.42881142	33.45690079
am129	SHF	CROWN	1	0	1581.5434	3.693389194	-0.357465469	31.85844361	50.14264095	15.32624457	27.05431901	9.635214918	2.760615603
am129	SMP	BROOM	0	0	2055.3665	2.697604689	0.705344281	15.14747139	29.69647031	3.747475776	1.706067085	-3.671074363	-1.647974624
am129	SHP	BALLOON	1	0	2332.7309	5.464390023	-1.376041082	10.36065519	31.00692031	-8.76864801	8.772044979	-12.29681795	-27.70529653
am129	SMP	HONEY	0	0	3642.2193	4.26802412	-0.073595084	-8.425013374	-3.413438599	-4.663682809	7.711358287	-22.15035439	-27.7922833
am129	SMP	QUILT	0	0	2403.5095	1.373739518	2.121934251	1.359213157	-11.32645154	41.79779567	-4.590975177	9.155428595	7.809082133
am129	SHF	CAMERA	1	0	1844.8322	0.661745569	-0.680521555	17.10222289	28.51887338	-3.849658646	15.1174535	2.609646213	9.835261991
am129	SMP	HAMMER	0	0	2398.4155	-1.203909536	-1.526897246	-31.78658626	-57.00577139	-4.273065976	-0.564699079	-13.32532631	1.175780819
am129	MF	LIZARD	0	0	1782.4809	0.520957041	0.068781922	38.22023105	74.55444474	-5.643439904	30.93772947	-12.31308161	-2.141112523
am129	SMP	FORK	0	0	2887.8848	1.516201353	1.334383648	-13.77864144	-23.41661869	-13.88642188	-6.286847481	-10.35255633	17.23755775
am129	SHF	TIGER	1	1	2567.7798	-2.764954174	2.994088525	18.0179771	28.39653547	17.71358498	2.615745921	15.10991512	-10.75309932
am129	SHF	SCISSORS	1	0	1629.1859	2.732641338	3.728293083	15.16105223	24.94219677	14.22001335	-13.01094399	13.33648442	-2.80836427
am129	IF	SOAP	0	0	2794.839	3.137736334	-0.789091585	1.039734888	11.03027524	-22.14477532	-16.76282091	10.28904792	-15.92984754
am129	SMF	NET	0	0	2064.9038	-0.723582761	1.298621379	4.998732875	7.773098583	14.60112847	-2.243147414	13.28458602	-21.48944068
am129	SHP	CHERRY	1	0	2130.6635	5.123932296	-2.46288573	1.605039727	-3.993668641	8.090578972	24.55420749	-4.561197146	9.848642351
am129	SHP	MONKEY	1	0	2028.0143	0.646259138	0.789724862	1.401956155	6.615164644	-18.049813	14.09528133	-8.917708359	3.157287357
am129	SHP	NAPKIN	1	0	2495.0046	1.06080811	3.931330554	13.84557674	34.25997294	-9.772219909	-0.109253361	2.588044471	-23.93174354
am129	SMF	PURSE	0	0	1915.2154	0.346874122	-0.102220928	11.15000105	12.01980165	20.77576563	-21.92185412	20.12690425	9.924607963
am129	SHF	SPONGE	1	0	3207.0682	0.680436616	0.354554225	3.226451369	-5.667021183	-2.856938736	25.73499914	14.96732232	16.49202249
am129	SHF	DUCK	1	0	1593.691	1.021111144	1.172866522	12.35970261	26.7954067	-8.843163169	5.076964363	-8.963175967	4.792740292
am129	SMP	CEREAL	0	0	2511.6242	1.912297847	0.162522893	30.00881344	71.0096344	-22.67162558	4.966491353	-26.71666818	-0.823222603
am129	SMF	CHICKEN	0	0	2082.1945	4.523977896	0.690408552	15.84435959	29.93058352	4.880745359	10.51367653	1.379889151	-10.49184375
am129	SMF	PENNY	0	0	2134.805	2.624801792	-0.74411397	33.07422522	50.02115346	13.81016361	25.05493796	2.806486952	24.48021646
am129	SMF	MUFFIN	0	0	1943.0835	0.477654574	-0.207884066	-15.66109059	-17.12221017	-35.19824871	7.119144255	-12.32839164	-9.672992721
am129	SMF	MOON	0	0	3045.3607	-0.584564571	-0.984235467	38.81002178	60.58361292	25.0871777	10.70973166	13.4074519	12.49515067
am129	IP	CARROT	0	0	1854.587	-0.605416688	-2.036780557	-24.4137693	-43.0212994	2.702168598	-22.35557252	-0.143353018	-5.352467047
am129	SHF	CRAB	1	0	3239.9108	-2.910254693	0.665319354	4.454043158	13.13910823	-25.72777341	-3.580736355	4.323019172	4.723501075
am129	SHF	SPOON	1	0	2845.8414	-0.570113628	0.153932156	20.56262187	37.23225856	-10.67173057	24.44206644	-0.391559865	5.591203578
am129	IP	KETTLE	0	0	2146.7926	2.271866558	0.955641293	-21.46329255	-45.65852694	16.22727258	7.59570703	-10.24115024	7.19765514
am129	SMP	BUTTER	0	0	1868.6591	0.998612771	-0.26259464	-18.0547165	-25.27050169	-10.45374192	-27.99629426	-0.442084069	-10.17946588
am129	SHF	TRAY	1	0	2562.5731	-1.407012604	-1.687223198	29.30690771	52.83898765	4.59692861	26.97387089	-6.884261577	1.953118097
am129	SHP	ORANGE	1	0	2352.352	-0.389454394	-3.690858411	2.668053075	-12.62192102	24.11484013	9.940691755	16.35493477	22.92224943
am129	SHP	WHIP	1	0	2044.8549	-1.535326982	2.465859912	-0.438872494	0.737733043	-4.929822607	-10.10187265	1.791526893	3.28228318
am129	SHF	MAP	1	0	1431.1231	0.048748092	-2.034607828	-13.0408755	-18.53407342	-14.02300877	-23.74287789	1.480995992	0.708741426
am129	MP	TOILET	0	0	3203.8973	2.441868043	-2.531060752	-2.458075183	-12.96290501	4.714167407	7.317103562	16.94127942	3.584114437
am129	SMF	GLASSES	0	0	1324.2821	3.736889873	1.57730155	-0.405696942	-2.911195863	-4.194991976	7.554565466	4.490989767	2.368096309
am129	SHP	CAPE	1	0	2611.8382	1.184291298	-0.680111238	20.44553184	32.2943406	15.13167746	-6.212940978	16.51688453	-0.203343094
am129	MF	LIME	0	0	3180.275	-2.596906137	-3.176233646	-13.50447887	-12.8225161	-10.89549875	-16.78025522	-25.94223808	-1.492225722
am129	SMF	HIGHWAY	0	0	2894.1012	-3.325380459	-1.294239004	14.71186617	28.16991406	-3.904415188	34.19681357	-12.44069716	-3.078805604
am129	SMP	BOOT	0	0	1948.9559	0.926648886	-1.914202543	0.922966759	-2.112606647	49.62432275	-37.1418961	15.92355243	-27.73744663
am129	SMP	TAXI	0	0	1702.899	-0.707997949	-1.23595391	-11.64883514	-11.66017242	-18.76932381	-6.954924996	-5.208555174	-15.51242027
am129	SHF	TRUMPET	1	0	1234.0399	3.982745431	-0.087707831	-0.327096045	5.152724612	16.67805722	-12.33066257	-15.67077737	-13.42589933
am129	SMP	CIGAR	0	0	3367.4089	-4.4162855	2.577898643	20.5206145	36.21625407	-2.520964198	38.18567157	-6.48079627	-1.026408592
am129	SMF	CHEESE	0	0	2100.521	-0.765848035	-1.072390824	11.97072329	23.49272914	32.73855196	-41.53796149	-1.818467305	-3.009476585
am131	SHF	CRAB	1	0	2458.2722	2.23592773	2.720654574	1.182751951	7.058226731	9.072583314	-2.746458077	-12.66977276	-9.993790954
am131	MF	MOUSE	0	0	1356.3596	-0.435449026	-1.075709352	-18.21142517	-16.04678785	-36.52995056	-28.30339618	-14.39737935	4.423916087
am131	SHP	SHOVEL	1	0	3223.81	3.611371542	2.731533553	21.84473122	19.82781126	33.93793899	-4.976424371	15.42172264	44.73115473
[truncated: 7,811 more rows]
