# Supplementary material for: Hippocampal and cortical mechanisms at retrieval explain variability in episodic remembering in older adults
Source: eLife. 2020 May 29;9:e55335. doi: 10.7554/eLife.55335 (PMC7259949; doi:10.7554/eLife.55335)
Supplement: Figure 4—source data 3. [file elife-55335-fig4-data3.csv]

Subject	Region	Trial Type	Within Event	Within Category	Between Category
am100	ANG	Assoc Hit	0.027113635	0.031255489	0.018628546
am104	ANG	Assoc Hit	0.038253562	0.010889441	0.014580403
am105	ANG	Assoc Hit	0.054522047	0.02399914	0.019782981
am106	ANG	Assoc Hit	0.050210926	0.027787999	0.005956384
am107	ANG	Assoc Hit	0.009109012	0.011284485	0.009806338
am109	ANG	Assoc Hit	0.058472343	0.022269215	0.01159984
am110	ANG	Assoc Hit	0.062444783	0.031812599	0.009283395
am113	ANG	Assoc Hit	0.046335004	0.034105027	0.010132627
am114	ANG	Assoc Hit	0.023175463	0.014610724	0.009896343
am115	ANG	Assoc Hit	0.013405375	0.002640666	0.005748276
am116	ANG	Assoc Hit	0.072445438	0.027653259	-0.009568267
am117	ANG	Assoc Hit	0.033466373	0.036475007	0.014112179
am118	ANG	Assoc Hit	0.013001875	0.025524244	0.000941571
am121	ANG	Assoc Hit	0.046722433	0.020017545	0.01371562
am122	ANG	Assoc Hit	0.065033015	0.043889783	-0.003500713
am124	ANG	Assoc Hit	0.033813922	0.041092077	0.013456534
am125	ANG	Assoc Hit	0.024845974	0.021806591	0.008241867
am127	ANG	Assoc Hit	0.020739204	0.037375808	0.015324144
am129	ANG	Assoc Hit	0.049875705	0.008901335	-0.000814549
am131	ANG	Assoc Hit	0.068557423	0.078191676	0.046890302
am132	ANG	Assoc Hit	0.066228954	0.035031988	0.01783867
am133	ANG	Assoc Hit	0.033306195	0.025412777	0.014930432
am134	ANG	Assoc Hit	-0.000302661	0.002125712	0.006843662
am135	ANG	Assoc Hit	0.046374487	0.022270183	0.013013507
am136	ANG	Assoc Hit	0.040795557	0.0314867	0.002032432
am138	ANG	Assoc Hit	0.01472713	0.028392003	0.009432918
am139	ANG	Assoc Hit	0.039070043	0.021021741	0.010018565
am140	ANG	Assoc Hit	-0.002651993	0.016016862	0.007984006
am143	ANG	Assoc Hit	0.024570836	0.03532739	0.009041583
am145	ANG	Assoc Hit	0.009655855	0.024618452	0.00575389
am146	ANG	Assoc Hit	0.042523136	0.021640465	0.008791666
am147	ANG	Assoc Hit	-0.012070618	0.018755967	0.001686202
am148	ANG	Assoc Hit	-0.032486313	0.01407268	0.002535958
am149	ANG	Assoc Hit	0.017076077	0.024504142	0.002040175
am150	ANG	Assoc Hit	0.041253329	0.015865114	-0.007104226
am152	ANG	Assoc Hit	0.021583289	0.018517837	0.001525005
am153	ANG	Assoc Hit	-0.008913506	0.031313551	0.0090884
am158	ANG	Assoc Hit	0.023175463	0.014610724	0.009896343
am161	ANG	Assoc Hit	0.037798775	0.010514868	0.023713946
am162	ANG	Assoc Hit	0.052403583	0.023470814	0.012845644
am163	ANG	Assoc Hit	0.004676043	0.019407173	0.010942743
am164	ANG	Assoc Hit	0.042647111	0.023676493	0.017851198
am166	ANG	Assoc Hit	0.053490055	0.023024704	0.012516349
am167	ANG	Assoc Hit	-0.010982712	0.020350978	0.017865208
am168	ANG	Assoc Hit	0.039697855	0.012365493	-0.007759521
am169	ANG	Assoc Hit	0.030755197	0.025508613	0.012287061
am170	ANG	Assoc Hit	0.023175463	0.014610724	0.009896343
am171	ANG	Assoc Hit	0.031893367	0.028883507	-0.017978186
am172	ANG	Assoc Hit	0.020688452	0.014003222	0.006472969
am173	ANG	Assoc Hit	0.023175463	0.014610724	0.009896343
am175	ANG	Assoc Hit	-0.030318137	0.025486423	0.010946773
am176	ANG	Assoc Hit	0.023175463	0.014610724	0.009896343
am177	ANG	Assoc Hit	0.05396595	0.017062635	0.005183024
am180	ANG	Assoc Hit	0.030380901	0.040662931	0.01916227
am181	ANG	Assoc Hit	0.023175463	0.014610724	0.009896343
am182	ANG	Assoc Hit	0.023175463	0.014610724	0.009896343
am183	ANG	Assoc Hit	0.023175463	0.014610724	0.009896343
am184	ANG	Assoc Hit	0.023175463	0.014610724	0.009896343
am185	ANG	Assoc Hit	0.043197492	0.010632621	-0.004639032
am186	ANG	Assoc Hit	-0.042716144	0.011678799	0.000296245
am187	ANG	Assoc Hit	0.030999132	0.023304401	0.008919923
am188	ANG	Assoc Hit	0.020645907	0.030362433	0.00886006
am189	ANG	Assoc Hit	0.018999865	0.040015592	0.007232628
am190	ANG	Assoc Hit	-0.005371827	0.028942081	-0.006070302
am191	ANG	Assoc Hit	0.02253358	0.030912652	0.009864541
am192	ANG	Assoc Hit	0.029080998	0.020388854	0.013281022
am193	ANG	Assoc Hit	0.093240989	0.047783011	0.016262741
am194	ANG	Assoc Hit	0.010779091	0.025117562	0.008097814
am195	ANG	Assoc Hit	0.023175463	0.014610724	0.009896343
am196	ANG	Assoc Hit	0.005975956	0.005190556	0.008306925
am20	ANG	Assoc Hit	0.018638303	0.016041219	-0.008521705
am200	ANG	Assoc Hit	0.023668632	0.02837598	0.011691383
am202	ANG	Assoc Hit	0.04907392	0.019792748	0.004762353
am203	ANG	Assoc Hit	0.023175463	0.014610724	0.009896343
am29	ANG	Assoc Hit	-0.030291697	0.018525598	0.006095567
am30	ANG	Assoc Hit	0.061040945	0.026351384	0.015373265
am35	ANG	Assoc Hit	0.018023511	0.022782312	0.0122028
am36	ANG	Assoc Hit	0.023175463	0.014610724	0.009896343
am41	ANG	Assoc Hit	0.026461606	0.019469002	0.009535024
am44	ANG	Assoc Hit	0.053682581	0.012576373	0.005409211
am45	ANG	Assoc Hit	0.031797938	0.025103184	-0.002158801
am46	ANG	Assoc Hit	-0.002509746	0.026429933	0.016616391
am58	ANG	Assoc Hit	0.072976346	0.040309163	0.025919404
am60	ANG	Assoc Hit	0.046014803	0.018942374	0.007626401
am63	ANG	Assoc Hit	0.023175463	0.014610724	0.009896343
am65	ANG	Assoc Hit	0.019936898	0.021305541	-0.001116133
am70	ANG	Assoc Hit	0.023175463	0.014610724	0.009896343
am73	ANG	Assoc Hit	0.059609418	0.030950783	0.009827254
am77	ANG	Assoc Hit	0.025741385	0.014286113	0.009627519
am78	ANG	Assoc Hit	0.042679879	0.01673324	-0.023604346
am80	ANG	Assoc Hit	0.046488071	0.03896874	-0.005608327
am84	ANG	Assoc Hit	0.040741259	0.024728409	0.003940725
am85	ANG	Assoc Hit	0.018719132	0.023972433	0.013770281
am90	ANG	Assoc Hit	0.06792233	0.016967626	0.01803347
am93	ANG	Assoc Hit	0.031027407	0.012282875	0.001998302
am94	ANG	Assoc Hit	0.050669091	0.01583376	0.015711645
am95	ANG	Assoc Hit	0.023175463	0.014610724	0.009896343
am96	ANG	Assoc Hit	0.033293251	0.028113565	0.015808367
am97	ANG	Assoc Hit	0.011276921	-0.000203804	0.003223078
am98	ANG	Assoc Hit	0.061629689	0.035610663	0.012634185
am100	VTC	Assoc Hit	0.043210479	0.020548474	0.005964164
am104	VTC	Assoc Hit	0.013986456	0.015040127	0.023716107
am105	VTC	Assoc Hit	0.035880385	0.019805163	0.010320199
am106	VTC	Assoc Hit	0.02947886	0.020723876	0.021751046
am107	VTC	Assoc Hit	0.019555296	0.012980174	0.013866628
am109	VTC	Assoc Hit	0.048338953	0.01832835	0.013105902
am110	VTC	Assoc Hit	0.03370671	0.01939171	0.013255499
am113	VTC	Assoc Hit	0.024845206	0.019441993	0.01291919
am114	VTC	Assoc Hit	0.019980851	0.017134264	0.015239537
am115	VTC	Assoc Hit	0.01276564	0.011064185	0.012859739
am116	VTC	Assoc Hit	0.035019552	0.025294034	0.000462373
am117	VTC	Assoc Hit	0.017765238	0.026806299	0.016682064
am118	VTC	Assoc Hit	0.003874296	0.016927866	0.011893059
am121	VTC	Assoc Hit	0.019565342	0.018374702	0.014560594
am122	VTC	Assoc Hit	0.05556425	0.03230112	0.009895183
am124	VTC	Assoc Hit	-0.00613045	0.020347318	0.018257296
am125	VTC	Assoc Hit	0.025325398	0.024286792	0.014979715
am127	VTC	Assoc Hit	-0.001977677	0.021485257	0.024441494
am129	VTC	Assoc Hit	0.043050503	0.02043456	0.015135956
am131	VTC	Assoc Hit	0.012257108	0.028485646	0.018421314
am132	VTC	Assoc Hit	0.029035733	0.021247569	0.014043487
am133	VTC	Assoc Hit	0.022663741	0.020342338	0.019677534
am134	VTC	Assoc Hit	0.018573986	0.010514318	0.01369372
am135	VTC	Assoc Hit	0.040929631	0.023897853	0.015424241
am136	VTC	Assoc Hit	0.046738383	0.028825292	0.008259577
am138	VTC	Assoc Hit	0.023396972	0.031209635	0.013143316
am139	VTC	Assoc Hit	0.013259207	0.022329308	0.019175274
am140	VTC	Assoc Hit	-0.011043345	0.020358896	0.018237641
am143	VTC	Assoc Hit	0.021175148	0.025743607	0.019909939
am145	VTC	Assoc Hit	0.031143455	0.019816511	0.013720074
am146	VTC	Assoc Hit	0.020087002	0.014217067	0.018115487
am147	VTC	Assoc Hit	-0.003178839	0.015037448	0.01251839
am148	VTC	Assoc Hit	0.003151361	0.017010056	0.016907706
am149	VTC	Assoc Hit	0.010300023	0.019540667	0.006971447
am150	VTC	Assoc Hit	0.044570325	0.011959217	0.004846528
am152	VTC	Assoc Hit	0.038970101	0.021349467	0.014497489
am153	VTC	Assoc Hit	-0.025186996	0.016002327	0.008527872
am158	VTC	Assoc Hit	0.019980851	0.017134264	0.015239537
am161	VTC	Assoc Hit	0.014658812	0.012598617	0.017283563
am162	VTC	Assoc Hit	0.036580409	0.020813016	0.018670137
am163	VTC	Assoc Hit	0.002211909	0.022552998	0.009220285
am164	VTC	Assoc Hit	0.038227229	0.025816216	0.018216265
am166	VTC	Assoc Hit	0.02171326	0.018096276	0.014198994
am167	VTC	Assoc Hit	0.005384678	0.016142928	0.018582287
am168	VTC	Assoc Hit	0.049474156	0.02033959	0.007251431
am169	VTC	Assoc Hit	0.026394543	0.022667928	0.00949996
am170	VTC	Assoc Hit	0.019980851	0.017134264	0.015239537
am171	VTC	Assoc Hit	0.026785122	0.026198732	0.009643143
am172	VTC	Assoc Hit	0.012060394	0.024493314	0.015646674
am173	VTC	Assoc Hit	0.019980851	0.017134264	0.015239537
am175	VTC	Assoc Hit	-0.005414786	0.01777647	0.009183883
am176	VTC	Assoc Hit	0.019980851	0.017134264	0.015239537
am177	VTC	Assoc Hit	0.040757866	0.01432081	0.01123699
am180	VTC	Assoc Hit	0.008185463	0.016645878	0.009316961
am181	VTC	Assoc Hit	0.019980851	0.017134264	0.015239537
am182	VTC	Assoc Hit	0.019980851	0.017134264	0.015239537
am183	VTC	Assoc Hit	0.019980851	0.017134264	0.015239537
am184	VTC	Assoc Hit	0.019980851	0.017134264	0.015239537
am185	VTC	Assoc Hit	0.03071167	0.01921392	0.016300802
am186	VTC	Assoc Hit	-0.031364394	0.015114983	0.007344282
am187	VTC	Assoc Hit	0.027152621	0.021045435	0.001160319
am188	VTC	Assoc Hit	0.043335693	0.032695899	0.011867365
am189	VTC	Assoc Hit	0.014486275	0.012648591	-0.001709062
am190	VTC	Assoc Hit	0.003094232	0.022753947	0.003353574
am191	VTC	Assoc Hit	0.022543393	0.017968347	0.006613016
am192	VTC	Assoc Hit	0.023489132	0.015598586	0.014343054
am193	VTC	Assoc Hit	0.105030454	0.03244607	0.032073554
am194	VTC	Assoc Hit	0.026936051	0.02640886	0.015683172
am195	VTC	Assoc Hit	0.019980851	0.017134264	0.015239537
am196	VTC	Assoc Hit	0.02673019	0.013638551	0.005783009
am20	VTC	Assoc Hit	0.004036917	0.017707167	0.01607784
am200	VTC	Assoc Hit	0.021495716	0.019948631	0.013290242
am202	VTC	Assoc Hit	0.027835895	0.017979949	0.020700811
am203	VTC	Assoc Hit	0.019980851	0.017134264	0.015239537
am29	VTC	Assoc Hit	-0.000136875	0.022939221	0.005836673
am30	VTC	Assoc Hit	0.020186358	0.022816392	0.014364694
am35	VTC	Assoc Hit	0.028873897	0.017016738	0.01746672
am36	VTC	Assoc Hit	0.019980851	0.017134264	0.015239537
am41	VTC	Assoc Hit	0.013664415	0.011854724	0.01041397
am44	VTC	Assoc Hit	0.054288413	0.027600952	0.020798586
am45	VTC	Assoc Hit	0.016518626	0.024668021	0.015290742
am46	VTC	Assoc Hit	0.027540421	0.027567241	0.032573411
am58	VTC	Assoc Hit	0.031718997	0.023568801	0.019498995
am60	VTC	Assoc Hit	0.027471733	0.02061688	0.016864754
am63	VTC	Assoc Hit	0.019980851	0.017134264	0.015239537
am65	VTC	Assoc Hit	0.014307316	0.020615711	0.012364358
am70	VTC	Assoc Hit	0.019980851	0.017134264	0.015239537
am73	VTC	Assoc Hit	0.013317836	0.015078674	0.012059118
am77	VTC	Assoc Hit	0.014627258	0.011968778	0.009338038
am78	VTC	Assoc Hit	0.027216991	0.008334003	0.008589917
am80	VTC	Assoc Hit	0.014300756	0.013307589	0.01448527
am84	VTC	Assoc Hit	0.027803846	0.022275709	0.014360368
am85	VTC	Assoc Hit	0.021522876	0.0168518	0.018234398
am90	VTC	Assoc Hit	0.048657512	0.020019718	0.027245078
am93	VTC	Assoc Hit	0.014203414	0.015697352	0.014336231
am94	VTC	Assoc Hit	0.031866172	0.016362819	0.013444685
am95	VTC	Assoc Hit	0.019980851	0.017134264	0.015239537
am96	VTC	Assoc Hit	0.036769257	0.020261264	0.016383405
am97	VTC	Assoc Hit	0.025684078	0.014652874	0.012547667
am98	VTC	Assoc Hit	0.039199769	0.024487157	0.019700425
am104	ANG	Assoc Miss	0.049509293	0.010601628	0.006868497
am105	ANG	Assoc Miss	0.069619954	0.0104577	-0.001523388
am106	ANG	Assoc Miss	0.07762708	0.004801553	0.00817295
am107	ANG	Assoc Miss	0.005731725	0.018874182	0.010213655
am109	ANG	Assoc Miss	0.030253582	0.014375975	0.015627083
am113	ANG	Assoc Miss	0.009200948	0.00926856	0.011341506
am115	ANG	Assoc Miss	0.032945551	0.026580781	0.014044409
am118	ANG	Assoc Miss	0.054958074	-0.001568621	0.014675751
am121	ANG	Assoc Miss	0.018916642	0.020470931	0.009097056
am122	ANG	Assoc Miss	0.018194823	0.0086146	0.016266919
am124	ANG	Assoc Miss	0.042443725	0.006899069	0.00802826
am125	ANG	Assoc Miss	0.035529072	0.010078053	0.007111171
am127	ANG	Assoc Miss	-0.010031991	0.01179469	0.012957912
am129	ANG	Assoc Miss	0.016895269	0.011620534	0.012056045
am131	ANG	Assoc Miss	0.060373602	0.012743825	-0.008013467
am133	ANG	Assoc Miss	-0.029772078	0.016516618	0.015547739
am134	ANG	Assoc Miss	0.057856705	0.017520818	0.008851609
am136	ANG	Assoc Miss	0.028647822	0.009676608	0.015930955
am138	ANG	Assoc Miss	0.109458366	0.004879294	0.015618007
am139	ANG	Assoc Miss	0.002379997	-0.001103148	-0.006625667
am140	ANG	Assoc Miss	0.049953011	0.020079844	0.012350425
am147	ANG	Assoc Miss	0.020744997	0.018365513	0.0073988
am148	ANG	Assoc Miss	0.078837239	0.015148767	0.017256727
am149	ANG	Assoc Miss	-0.016251893	0.007748399	0.00815506
am150	ANG	Assoc Miss	0.005097597	0.013356333	0.026896911
am152	ANG	Assoc Miss	0.099498457	0.004192235	0.007420634
am153	ANG	Assoc Miss	0.055264432	-0.002092104	0.010704285
am161	ANG	Assoc Miss	0.008552151	0.018706579	-0.003921261
am162	ANG	Assoc Miss	0.029776056	0.009609822	0.005843803
am163	ANG	Assoc Miss	0.023700264	0.008645804	0.005486592
am164	ANG	Assoc Miss	0.070748231	0.017310102	0.004362051
am166	ANG	Assoc Miss	-0.007139129	0.006196743	0.007276336
am167	ANG	Assoc Miss	0.054652286	0.014653764	0.001856777
am168	ANG	Assoc Miss	-0.000746546	0.021580259	0.023976181
am169	ANG	Assoc Miss	0.060251948	0.007776088	0.002862226
am171	ANG	Assoc Miss	0.019631182	0.023499994	0.007515919
am172	ANG	Assoc Miss	0.028192763	0.013643043	0.011473704
am177	ANG	Assoc Miss	-0.000329078	0.008522054	0.008991639
am180	ANG	Assoc Miss	0.037016965	-0.018954824	-0.012232888
am185	ANG	Assoc Miss	-0.054020366	0.023541216	0.019194778
am186	ANG	Assoc Miss	0.156532981	0.023616431	0.033865606
am189	ANG	Assoc Miss	0.027351061	-0.010794145	0.012560058
am190	ANG	Assoc Miss	0.058306855	0.013838399	0.033765136
am191	ANG	Assoc Miss	0.023817346	-0.001691205	0.009928145
am192	ANG	Assoc Miss	0.026457371	0.015733847	0.011391088
am194	ANG	Assoc Miss	0.003946573	0.012101359	0.013406951
am196	ANG	Assoc Miss	0.076874327	0.0293048	-0.007500964
am20	ANG	Assoc Miss	-0.006638898	0.013281204	0.007424065
am200	ANG	Assoc Miss	0.045769274	0.004988954	0.014982189
am202	ANG	Assoc Miss	-0.002722994	0.009428699	0.015030332
am29	ANG	Assoc Miss	-0.027791971	0.028909849	-0.010188596
am30	ANG	Assoc Miss	0.014191245	0.012530703	0.013585793
am35	ANG	Assoc Miss	-0.006994885	0.008924427	0.005695797
am41	ANG	Assoc Miss	0.015852697	0.016373217	0.013463081
am45	ANG	Assoc Miss	0.048747769	0.022084154	0.013096909
am46	ANG	Assoc Miss	0.045899912	0.019407021	-0.000987463
am60	ANG	Assoc Miss	-0.002461517	0.021865652	0.010946832
am73	ANG	Assoc Miss	0.050357499	0.015977614	0.004151521
am77	ANG	Assoc Miss	0.021852659	0.016669118	0.012569537
am85	ANG	Assoc Miss	0.038531981	0.011239042	0.005292701
am90	ANG	Assoc Miss	0.005761035	-0.002937282	0.005923761
am93	ANG	Assoc Miss	0.015323519	0.016938572	0.017794384
am94	ANG	Assoc Miss	0.008619448	0.037771455	0.006622798
am96	ANG	Assoc Miss	0.013057675	0.001107882	0.003984318
am97	ANG	Assoc Miss	-0.006368543	0.023947366	0.01381518
am98	ANG	Assoc Miss	0.020515938	0.008283789	0.006911794
am104	VTC	Assoc Miss	0.024241108	0.01430997	0.020479691
am105	VTC	Assoc Miss	0.095803949	0.013892044	0.015011723
am106	VTC	Assoc Miss	0.032799107	0.010274882	0.017460888
am107	VTC	Assoc Miss	-0.012317923	0.020700761	0.015792179
am109	VTC	Assoc Miss	0.003493382	0.020237193	0.026919421
am113	VTC	Assoc Miss	0.042978584	0.020980666	0.01891932
am115	VTC	Assoc Miss	0.027196063	0.023204344	0.017619335
am118	VTC	Assoc Miss	0.036354965	0.015748965	0.018204514
am121	VTC	Assoc Miss	0.041191669	0.025245317	0.021259543
am122	VTC	Assoc Miss	0.02589838	0.012092607	0.019216881
am124	VTC	Assoc Miss	0.065761285	0.013204678	0.008666126
am125	VTC	Assoc Miss	0.014197054	0.015306754	0.012002181
am127	VTC	Assoc Miss	-0.016024878	0.016817973	0.014418824
am129	VTC	Assoc Miss	0.010557131	0.016068867	0.013594943
am131	VTC	Assoc Miss	0.060173266	0.011594441	0.010749714
am133	VTC	Assoc Miss	0.004787594	0.020174576	0.015851667
am134	VTC	Assoc Miss	0.022687562	0.023456638	0.020454392
am136	VTC	Assoc Miss	-0.029039038	0.012678621	0.018525399
am138	VTC	Assoc Miss	0.058325529	-0.003743727	0.022229241
am139	VTC	Assoc Miss	0.005038465	0.01328226	0.026934331
am140	VTC	Assoc Miss	-0.008000316	0.02858121	0.016123403
am147	VTC	Assoc Miss	0.047469471	0.022341445	0.018928217
am148	VTC	Assoc Miss	0.036810342	0.017258473	0.013571369
am149	VTC	Assoc Miss	-0.005509786	0.019597348	0.024843458
am150	VTC	Assoc Miss	-0.004608622	0.022309312	0.025632546
am152	VTC	Assoc Miss	0.030148174	0.012429145	0.008202328
am153	VTC	Assoc Miss	0.065148699	0.018266202	0.021951202
am161	VTC	Assoc Miss	0.02530289	0.021669912	0.013195511
am162	VTC	Assoc Miss	0.004201421	0.013066144	0.011335912
am163	VTC	Assoc Miss	0.038369381	0.007382913	0.028323527
am164	VTC	Assoc Miss	0.020132293	0.015264844	0.014331317
am166	VTC	Assoc Miss	0.018248443	0.016172253	0.01628008
am167	VTC	Assoc Miss	0.002813272	0.026590745	0.013586927
am168	VTC	Assoc Miss	-0.013139194	0.021329073	0.0184231
am169	VTC	Assoc Miss	0.036624576	0.017638496	0.017708335
am171	VTC	Assoc Miss	0.01577717	0.009649966	0.012721866
am172	VTC	Assoc Miss	0.039919778	0.016114927	0.014794699
am177	VTC	Assoc Miss	0.018239247	0.018827794	0.017007037
am180	VTC	Assoc Miss	0.055080899	0.010374856	0.011333506
am185	VTC	Assoc Miss	-0.008536386	0.014083059	0.008427912
am186	VTC	Assoc Miss	0.042717224	0.016210503	0.018536538
am189	VTC	Assoc Miss	0.025475428	0.021619937	0.032188136
am190	VTC	Assoc Miss	0.007037055	0.011250121	0.02396124
am191	VTC	Assoc Miss	0.01741831	0.016300182	0.023866059
am192	VTC	Assoc Miss	-0.013099856	0.022123829	0.014485551
am194	VTC	Assoc Miss	0.003801865	0.014005963	0.020576511
am196	VTC	Assoc Miss	0.036248342	0.011908977	0.01947658
am20	VTC	Assoc Miss	0.052377848	0.022118999	0.028114363
am200	VTC	Assoc Miss	0.005789452	0.022841617	0.00754462
am202	VTC	Assoc Miss	0.012125808	0.016288579	0.009778264
am29	VTC	Assoc Miss	0.015827436	0.019268467	0.000497744
am30	VTC	Assoc Miss	0.00932424	0.014373599	0.017751652
am35	VTC	Assoc Miss	0.010274238	0.019023109	0.01753975
am41	VTC	Assoc Miss	0.045885825	0.030536638	0.017064473
am45	VTC	Assoc Miss	0.028571795	0.022045912	0.01633457
am46	VTC	Assoc Miss	0.035314505	0.021531217	0.005754856
am60	VTC	Assoc Miss	0.017198474	0.016993888	0.00871121
am73	VTC	Assoc Miss	0.009880767	0.010370129	0.020674334
am77	VTC	Assoc Miss	0.021716552	0.024202105	0.022215349
am85	VTC	Assoc Miss	0.012562126	0.019289748	0.009153398
am90	VTC	Assoc Miss	-0.00442769	-0.001173934	0.010216482
am93	VTC	Assoc Miss	0.025758289	0.018571177	0.016142844
am94	VTC	Assoc Miss	0.015269703	0.012004346	0.012832055
am96	VTC	Assoc Miss	0.003192446	0.014007265	0.01409567
am97	VTC	Assoc Miss	-0.004149465	0.019166345	0.012766934
am98	VTC	Assoc Miss	0.01935829	0.009674041	0.010592311
am100	ANG	Item Hit	0.019237291	-0.002034042	0.001164139
am105	ANG	Item Hit	-0.054615612	0.00937533	0.011429435
am107	ANG	Item Hit	0.054685652	0.013673504	0.009669035
am110	ANG	Item Hit	0.010898417	0.004359835	0.009296584
am117	ANG	Item Hit	0.012884553	-0.00725356	0.005680506
am122	ANG	Item Hit	-0.016756923	-0.00667106	0.016502061
am124	ANG	Item Hit	-0.006731258	-0.004158975	0.008204234
am125	ANG	Item Hit	-0.016054408	0.009740236	0.012735362
am127	ANG	Item Hit	0.027297261	0.003089412	0.009873083
am131	ANG	Item Hit	-0.011379037	-0.013102472	0.004740396
am132	ANG	Item Hit	-0.019878028	-0.005810541	0.001954015
am134	ANG	Item Hit	0.044304765	0.016945567	0.014336484
am135	ANG	Item Hit	-2.36E-05	0.006951265	0.006779178
am138	ANG	Item Hit	-0.054659107	0.010560873	0.004638103
am139	ANG	Item Hit	0.026183078	0.027079635	0.022706358
am143	ANG	Item Hit	0.041612825	0.000766087	0.02173677
am145	ANG	Item Hit	0.036695071	0.004602996	0.014038795
am146	ANG	Item Hit	0.010856314	0.011242353	0.009056997
am147	ANG	Item Hit	0.060852011	0.006710691	0.020604026
am152	ANG	Item Hit	-0.027509424	0.017588494	0.01956857
am163	ANG	Item Hit	0.014123549	0.018778825	0.009323626
am168	ANG	Item Hit	0.018994147	0.002600212	-0.018139839
am172	ANG	Item Hit	0.026299752	0.01851668	0.014803007
am175	ANG	Item Hit	-0.013311011	0.004309924	-0.00554203
am180	ANG	Item Hit	0.003560181	0.013445887	0.021876765
am185	ANG	Item Hit	0.055246715	0.011591815	0.016014176
am186	ANG	Item Hit	-0.044290448	0.00853694	-0.004472823
am187	ANG	Item Hit	0.015351795	0.005917046	0.010872762
am188	ANG	Item Hit	0.025705019	-0.001140986	0.010932625
am190	ANG	Item Hit	0.018357112	0.003344836	0.003728377
am193	ANG	Item Hit	0.012831555	0.022765325	0.014295256
am194	ANG	Item Hit	0.054800726	0.006613249	0.008184263
am200	ANG	Item Hit	0.004847462	0.011966981	0.009929743
am29	ANG	Item Hit	0.022536566	-0.021667709	0.031280866
am30	ANG	Item Hit	0.028436191	0.016865566	0.011578775
am35	ANG	Item Hit	0.031981362	0.010306947	0.011779237
am41	ANG	Item Hit	0.027212086	0.007989952	0.006690923
am44	ANG	Item Hit	0.00820672	0.01252726	0.01725261
am45	ANG	Item Hit	0.009920891	0.01409735	0.008832839
am46	ANG	Item Hit	0.041624849	0.007392984	0.01274855
am58	ANG	Item Hit	-0.00066324	0.008499228	0.008245324
am65	ANG	Item Hit	0.026414028	0.007915906	0.020908818
am73	ANG	Item Hit	-0.040440529	-0.003096226	0.015710253
am77	ANG	Item Hit	0.021932344	0.012876939	0.007491972
am78	ANG	Item Hit	0.003671047	0.012488207	0.043397032
am84	ANG	Item Hit	0.005609667	0.004493038	0.01585196
am97	ANG	Item Hit	0.05093711	0.028503261	0.002155351
am98	ANG	Item Hit	-0.018804824	0.007862422	0.010317282
am100	VTC	Item Hit	-0.003248776	0.013720055	0.02451491
am105	VTC	Item Hit	-0.071741779	0.017705586	0.02038669
am107	VTC	Item Hit	0.052705181	0.017721858	0.016059804
am110	VTC	Item Hit	0.008198948	0.01374377	0.015311767
am117	VTC	Item Hit	0.022196465	0.00746223	0.013797011
am122	VTC	Item Hit	-0.042265773	0.0152043	0.025665743
am124	VTC	Item Hit	0.000311718	0.017850797	0.018795189
am125	VTC	Item Hit	0.011133561	0.016333814	0.014814862
am127	VTC	Item Hit	0.039498652	0.010558751	0.015073256
am131	VTC	Item Hit	0.021659438	0.017242271	0.017672119
am132	VTC	Item Hit	0.01092597	0.01302096	0.016435587
am134	VTC	Item Hit	0.027648517	0.022824608	0.017964164
am135	VTC	Item Hit	-0.000967928	0.010370676	0.015054833
am138	VTC	Item Hit	-0.021779947	0.023936885	0.010346055
am139	VTC	Item Hit	0.029555762	0.026479163	0.001756375
am143	VTC	Item Hit	0.025296347	0.017205864	0.021900366
am145	VTC	Item Hit	0.008818248	0.014452017	0.016759001
am146	VTC	Item Hit	0.024940539	0.021527619	0.013085111
am147	VTC	Item Hit	0.015651922	0.0140239	0.014272005
am152	VTC	Item Hit	-0.01400186	0.021958845	0.015239612
am163	VTC	Item Hit	0.020011478	0.019110762	0.011431842
am168	VTC	Item Hit	-0.003709088	0.008014009	0.015929804
am172	VTC	Item Hit	0.018200093	0.015495838	0.018736245
am175	VTC	Item Hit	-0.004163206	0.017812749	0.016617753
am180	VTC	Item Hit	0.025826263	0.012744511	0.020603906
am185	VTC	Item Hit	0.02220418	0.017676566	0.022220174
am186	VTC	Item Hit	0.048589724	0.020077307	0.019837792
am187	VTC	Item Hit	0.012809082	0.013223094	0.029318756
am188	VTC	Item Hit	-0.00337399	0.00157263	0.018611709
am190	VTC	Item Hit	0.0236906	0.014697147	0.013949498
am193	VTC	Item Hit	-0.004685301	0.011141144	0.019871259
am194	VTC	Item Hit	0.029204638	0.01098797	0.009458929
am200	VTC	Item Hit	0.011520826	0.007021018	0.029533699
am29	VTC	Item Hit	0.024448692	0.010661781	0.029608069
am30	VTC	Item Hit	0.043583176	0.016187924	0.010332629
am35	VTC	Item Hit	0.008949646	0.015048408	0.012234196
am41	VTC	Item Hit	0.000392314	0.009011431	0.018240168
am44	VTC	Item Hit	0.002997852	0.007559886	0.018471181
am45	VTC	Item Hit	0.012520454	0.015645022	0.01153112
am46	VTC	Item Hit	0.008716204	0.005721058	0.006778953
am58	VTC	Item Hit	0.022350321	0.017054981	0.012759964
am65	VTC	Item Hit	0.025654386	0.013652818	0.018114717
am73	VTC	Item Hit	0.036743951	0.025953991	0.01298516
am77	VTC	Item Hit	0.023598744	0.01523191	0.014165225
am78	VTC	Item Hit	0.012744711	0.025934526	0.021889157
am84	VTC	Item Hit	0.012157856	0.01199282	0.016118707
am97	VTC	Item Hit	0.037246786	0.015207148	0.007462472
am98	VTC	Item Hit	0.005877951	0.020541006	0.015259384
am104	ANG	Item Miss	-0.018236466	0.022341101	0.008240128
am106	ANG	Item Miss	-0.058311617	0.011242619	0.015559694
am109	ANG	Item Miss	-0.019199536	0.007186981	0.002462105
am110	ANG	Item Miss	-0.003816811	0.007659736	0.011109049
am113	ANG	Item Miss	0.013990437	0.000458583	0.008214895
am116	ANG	Item Miss	-0.026094511	0.001568188	0.029360952
am118	ANG	Item Miss	0.001566441	0.019876547	0.014071706
am121	ANG	Item Miss	0.003887314	0.003343695	0.006876352
am122	ANG	Item Miss	0.026230937	0.012609571	0.010317104
am125	ANG	Item Miss	0.048381215	0.016818014	0.01149697
am127	ANG	Item Miss	0.054697378	0.006182984	0.001430231
am129	ANG	Item Miss	0.002755415	0.023310302	0.018447532
am131	ANG	Item Miss	-0.024850136	-0.019390135	-0.00403186
am133	ANG	Item Miss	0.065992273	0.001902776	-0.000789143
am134	ANG	Item Miss	-0.009156957	0.021850798	0.009553616
am136	ANG	Item Miss	8.30E-05	0.002668863	0.011725641
am139	ANG	Item Miss	0.025068735	0.011444666	0.013486113
am140	ANG	Item Miss	0.022225371	0.007735465	0.009354597
am143	ANG	Item Miss	0.003342728	0.007738693	-0.001089326
am146	ANG	Item Miss	0.016146939	0.010949353	0.011840364
am149	ANG	Item Miss	0.068702205	0.01157963	0.019493793
am152	ANG	Item Miss	-0.00087047	0.018144328	0.011071162
am162	ANG	Item Miss	-0.01265325	0.010751535	0.01099958
am163	ANG	Item Miss	0.050201997	0.011611092	0.01383241
am164	ANG	Item Miss	-0.043868953	0.002845576	0.007475779
am167	ANG	Item Miss	0.025856816	0.008827429	0.009967043
am168	ANG	Item Miss	0.034756396	0.021896931	0.04150855
am169	ANG	Item Miss	-0.021480755	0.01054747	0.014539741
am171	ANG	Item Miss	0.01800184	-0.00855133	0.040151295
am172	ANG	Item Miss	0.017520885	0.012279949	0.006835691
am175	ANG	Item Miss	0.113155537	0.014035823	0.024284285
am177	ANG	Item Miss	0.015889517	0.018247481	0.015514365
am180	ANG	Item Miss	0.021743805	0.023288901	0.010779224
am185	ANG	Item Miss	0.04827801	0.012677242	0.009015449
am190	ANG	Item Miss	0.021409713	0.012317578	0.008162161
am192	ANG	Item Miss	0.01398802	0.00770947	0.005016918
am193	ANG	Item Miss	-0.036546154	-0.026716165	-0.000868969
am196	ANG	Item Miss	-0.013323894	0.009336815	0.028883067
am20	ANG	Item Miss	0.057526984	0.014509748	0.030786668
am200	ANG	Item Miss	0.018416484	0.013110979	0.002982055
am29	ANG	Item Miss	0.128248954	0.032675156	0.012397533
am30	ANG	Item Miss	-0.010966528	0.002695241	-0.000952462
am35	ANG	Item Miss	0.049691865	0.016429208	0.009907536
am44	ANG	Item Miss	0.007637088	0.018728537	0.007027206
am45	ANG	Item Miss	0.002235254	-0.002841794	0.019814423
am46	ANG	Item Miss	0.007686838	0.005212957	0.011207893
am58	ANG	Item Miss	-0.002786717	-0.00497622	-0.0044757
am60	ANG	Item Miss	0.025973103	0.003024144	0.011115794
am80	ANG	Item Miss	-0.000137145	-0.009747293	0.025401012
am85	ANG	Item Miss	0.012275276	0.008620695	0.010626045
am90	ANG	Item Miss	-0.004156976	0.029801826	0.005731797
am94	ANG	Item Miss	0.010237851	-0.009773043	0.007354585
am97	ANG	Item Miss	0.036856365	0.006196072	0.020391762
am98	ANG	Item Miss	0.029361048	0.006686021	0.009722109
am104	VTC	Item Miss	0.021714991	0.022052696	0.001522813
am106	VTC	Item Miss	-0.002335414	0.020404035	0.006506677
am109	VTC	Item Miss	0.008110219	0.01283725	0.005693288
am110	VTC	Item Miss	0.018036896	0.018267313	0.017151346
am113	VTC	Item Miss	-0.007881236	0.010980134	0.013880101
am116	VTC	Item Miss	0.004942151	0.008974495	0.030016702
am118	VTC	Item Miss	0.019713293	0.018725962	0.015621039
am121	VTC	Item Miss	-0.000814457	0.007782774	0.009898474
am122	VTC	Item Miss	0.040726548	0.008939031	0.006180342
am125	VTC	Item Miss	0.029267393	0.012609698	0.019161391
am127	VTC	Item Miss	0.058427309	0.019675077	0.007024574
am129	VTC	Item Miss	0.006334919	0.014899365	0.016987712
am131	VTC	Item Miss	-0.014166407	0.0112147	0.014115001
am133	VTC	Item Miss	0.03249122	0.010885879	0.010189411
am134	VTC	Item Miss	0.011013341	0.011741493	0.008845872
am136	VTC	Item Miss	0.04224321	0.00989888	0.018933635
am139	VTC	Item Miss	0.032069971	0.006446327	0.013092168
am140	VTC	Item Miss	0.078986215	0.002462688	0.011357567
am143	VTC	Item Miss	0.013471059	0.008453322	0.003908306
am146	VTC	Item Miss	0.014915013	0.015658107	0.014518013
am149	VTC	Item Miss	0.055152317	0.012264778	0.013903707
am152	VTC	Item Miss	0.02480699	0.0127996	0.02301872
am162	VTC	Item Miss	0.019160724	0.017523633	0.015712562
am163	VTC	Item Miss	0.019330638	0.019490385	0.011982495
am164	VTC	Item Miss	0.001583033	0.010321734	0.01317103
am167	VTC	Item Miss	0.051744603	0.00866912	0.013549397
am168	VTC	Item Miss	0.047297532	0.018854387	0.019353815
am169	VTC	Item Miss	-0.003076565	0.011096369	0.018510316
am171	VTC	Item Miss	0.017380262	0.015554096	0.023353603
am172	VTC	Item Miss	0.00974314	0.012432978	0.011780531
am175	VTC	Item Miss	0.069520546	0.015813574	0.019916975
am177	VTC	Item Miss	0.000945441	0.018254189	0.017474584
am180	VTC	Item Miss	-0.009169219	0.028771813	0.019703776
am185	VTC	Item Miss	0.035543942	0.017563512	0.014009261
am190	VTC	Item Miss	0.046101518	0.019835842	0.019693837
am192	VTC	Item Miss	0.049553277	0.013680379	0.016890007
am193	VTC	Item Miss	-0.040402598	0.00781558	-0.006226201
am196	VTC	Item Miss	-0.003035978	0.025855265	0.020459022
am20	VTC	Item Miss	0.003527789	0.011576627	0.001526409
am200	VTC	Item Miss	0.041117412	0.018725791	0.010589588
am29	VTC	Item Miss	0.039784153	0.015667589	0.025015662
am30	VTC	Item Miss	0.006829631	0.015159142	0.018509173
am35	VTC	Item Miss	0.031825624	0.017448802	0.013717483
am44	VTC	Item Miss	0.002656289	0.016241956	0.006448845
am45	VTC	Item Miss	0.022312531	0.006178104	0.017801716
am46	VTC	Item Miss	0.008352274	0.013717542	0.015850929
am58	VTC	Item Miss	0.005873236	0.010779011	0.013459653
am60	VTC	Item Miss	0.015272347	0.013792025	0.020142647
am80	VTC	Item Miss	0.025660947	0.02096094	0.015993804
am85	VTC	Item Miss	0.025857552	0.015261245	0.018330816
am90	VTC	Item Miss	0.015712732	0.032557009	0.008257052
am94	VTC	Item Miss	0.012806679	0.023035628	0.019441871
am97	VTC	Item Miss	0.021142007	0.01951069	0.028181075
am98	VTC	Item Miss	0.015487395	0.013834854	0.015406029
