# Supplementary material for: Hippocampal and cortical mechanisms at retrieval explain variability in episodic remembering in older adults
Source: eLife. 2020 May 29;9:e55335. doi: 10.7554/eLife.55335 (PMC7259949; doi:10.7554/eLife.55335)
Supplement: Figure 4—source data 4. [file elife-55335-fig4-data4.csv]

	Subject	Condition	Word	Assoc_Hit	Ex_Sp_Hit	RT	WE_ANG	WE_VTC	WC_ANG	WC_VTC	HC
0	am100	SHF	BOWL	1	1	2857.8634	-0.186483546	-0.170340456	0.032422413	0.04800039	4.608560218
1	am100	SHP	WHIP	1	1	2951.3789	-0.065634241	-0.045617569	-0.005686075	0.035499106	-11.72793457
2	am100	SHP	MUFFIN	1	0	2556.0678	0.072614301	0.076538776	0.005093555	0.005407086	14.86943217
3	am100	SHF	UMBRELLA	1	1	2839.1033	0.085121239	0.080002724	0.08237603	0.029598612	-4.939188057
4	am100	SHP	HONEY	1	0	2955.8356	0.17158848	0.145916088	0.102072991	0.032861141	8.754181458
5	am100	SHF	PURSE	1	1	2846.6773	0.027844287	-0.011276383	0.046852072	0.031056042	-5.932688685
6	am100	SHF	FORK	1	0	3251.3575	-0.028904979	0.031867862	0.022559081	0.021711684	-2.429176512
7	am100	SHP	SWORD	1	1	2290.0044	-0.087871747	0.027025115	0.060256018	0.056150583	3.186073287
8	am100	SHP	TROPHY	1	1	3947.4905	0.039343445	0.132455629	0.018229896	0.035082479	13.7437197
9	am100	SHP	TAXI	1	1	2267.7462	-0.002263085	-0.000480344	-0.032545046	0.01516186	17.76689242
10	am100	SHF	WINE	1	1	2006.6388	-0.054661618	0.035630462	0.01842703	0.012706425	-0.468178951
11	am100	SHP	WALLET	1	0	3286.2774	0.027769253	-0.03258334	0.032140017	0.053920523	14.9824354
12	am100	SHF	PENCIL	1	1	3011.0852	0.071961862	0.176377527	0.037382967	0.056649477	7.701217541
13	am100	SHP	OVEN	1	0	3237.198	0.112484837	0.066344802	0.073095164	0.041562821	-2.930383601
14	am100	SHP	PLATE	1	1	4062.4649	0.277099866	0.102033836	0.05186131	0.013827885	33.20649023
15	am100	SHF	PAIL	1	1	2354.3961	0.04877471	0.097751598	-0.01242311	0.02304128	-0.430330757
16	am100	SHF	DIAMOND	1	1	4641.9724	-0.073813475	-0.030322911	0.016743912	0.049539481	16.92431342
17	am100	SHP	JACKET	1	0	4312.5383	0.006680574	-0.06333848	0.014360535	0.014399368	12.2405347
18	am100	SHF	BARREL	1	1	3267.0428	-0.05530922	-0.132255297	-0.022481771	0.026106031	3.374655999
19	am100	SHF	NEEDLE	1	1	2752.7494	0.101194294	0.12796565	0.04426999	0.044574253	14.42396899
20	am100	SHF	COFFEE	1	1	2267.996	-0.177380569	0.071286557	0.019892274	0.024864733	-6.33779519
21	am100	SHP	PAINTBRUSH	1	1	2755.7343	0.108338731	0.139895336	-0.067542676	0.006549326	-13.64285401
22	am100	SHF	WOLF	1	0	2069.9377	-0.127967549	0.04265963	0.03364333	0.00135902	-10.86552486
23	am100	SHF	NET	1	0	2570.4022	0.015367763	0.033792598	0.02665498	0.024728618	-7.638701894
24	am100	SHP	CROWN	1	0	3711.1251	-0.009445796	0.193186138	0.075928605	0.011210093	1.0622477
25	am100	SHF	QUILT	1	0	2697.977	0.214255872	-0.011639097	0.016782011	0.045394831	9.461140212
26	am100	SHP	PENNY	1	1	1971.917	-0.107192052	0.044993882	0.047046136	0.01463217	-6.519524715
27	am100	SHF	PILLOW	1	0	3868.0783	-0.174983071	-0.06905282	0.037872931	0.051776969	-0.050748509
28	am100	SHF	PYTHON	1	1	1989.9257	-0.148202437	0.007576055	0.041511111	0.048714137	1.440990269
29	am100	SHP	MUSTARD	1	1	3332.4731	0.241762895	0.236110753	0.019383563	0.024808886	-4.481228735
30	am100	SHF	CANDLE	1	1	2781.3251	-0.05610355	-0.027023771	0.048383084	0.023677728	-0.097107149
31	am100	SHP	TOILET	1	0	2341.4977	0.02734856	0.1589763	0.091947907	0.070267524	-2.276858958
32	am100	SHF	BASKET	1	0	3379.7452	-0.07553307	-0.04751103	0.011644908	0.038450467	10.97992052
33	am100	SHF	TIRE	1	0	2861.5443	0.213583294	0.123290597	-0.00042615	0.041936077	8.674738174
34	am100	SHP	VIOLIN	1	1	2304.7065	-0.009958804	0.039988663	0.059826195	0.043176497	5.076105029
35	am100	SHP	OTTER	1	1	2224.3819	0.064181653	-0.032231341	0.059536714	0.031932692	2.949903417
36	am100	SHP	LION	1	0	3201.2966	0.050705574	0.202170436	0.011708199	0.050453022	12.41169413
37	am100	SHF	ROSE	1	1	1830.4263	0.119317879	0.073501995	0.046369336	0.030169697	11.0349094
38	am100	SHF	CRAB	1	1	2222.5495	-0.062778168	0.155693922	0.046267117	0.014004628	-8.738503277
39	am100	SHF	MOTH	1	0	1738.4031	-0.092243903	0.096084915	0.019701077	0.030176837	3.804805565
40	am100	SHF	FAN	1	0	3142.2421	-0.149709852	0.081936807	0.014700419	0.024888646	18.83705106
41	am100	SHF	CORN	1	1	2230.2267	-0.144535353	-0.124672602	-0.012660183	0.035570287	-15.58252209
42	am100	SHP	BUTTER	1	0	3348.7083	0.135058678	0.104277723	0.086427138	0.054157925	10.05869088
43	am100	SHF	GOAT	1	0	1785.3001	0.267499314	0.235376908	0.083994473	0.062193305	16.48257281
44	am100	SHP	KITTEN	1	1	2130.2045	0.058769465	0.023509458	0.012717033	0.035556487	13.4961622
45	am100	SHF	STOOL	1	1	2434.5692	0.067717278	0.109543587	-0.011500006	0.003056829	0.775831557
46	am100	SHP	DOLLAR	1	1	2728.9275	0.285648187	-0.063593395	-0.021173631	-0.043580799	12.21536525
47	am100	SHF	NEST	1	0	2072.7041	0.290936441	0.106083535	-0.033077252	-0.002187525	-5.523687246
48	am100	SHF	DEER	1	0	1970.1897	0.09909865	0.099633332	0.015500085	0.061898837	-13.41111562
49	am100	MF	MAGNET	0	0	2008.1397	0.039057271	0.00838174	0.047525265	-0.038290688	5.156677888
50	am100	SMP	STAR	0	0	3783.1591	0.083443697	0.047366759	-0.025567584	0.038885296	-2.220437989
51	am100	IP	SPONGE	0	1	3663.7121	0.091574895	-0.031658863	-0.022758099	0.011024074	-12.14712544
52	am100	SMF	CAKE	0	0	3635.3807	-0.035785995	-6.38E-05	0.000507672	0.036435304	-9.931628981
53	am100	IF	BOOT	0	0	3655.2742	-0.152186221	0.034053243	-0.02797617	0.010621969	-4.36670278
54	am100	SMP	TRAY	0	0	3502.6423	0.065183918	0.042325748	0.020455941	0.014637406	15.31475785
55	am100	MF	LAMP	0	0	3372.9515	0.012127002	-0.123855209	-0.006508237	0.040237258	-0.385586286
56	am100	MP	ROCKET	0	0	3735.5336	0.091015316	-0.017457061	0.03719683	0.024019822	-13.67967888
57	am100	SMP	ENVELOPE	0	0	3499.8182	0.163980324	0.199646774	0.026128588	0.037452312	2.54888762
58	am100	MF	TOWEL	0	0	3036.3294	-0.078333928	0.040912086	0.017455979	0.009099831	-19.90709501
59	am100	IP	SCISSORS	0	0	3603.645	-0.167655688	0.106632137	0.018348283	0.005857099	10.35394667
60	am100	MF	ROPE	0	0	3650.5746	-0.006431317	0.070719973	-0.001345466	0.012074908	-25.7089855
61	am100	IP	SOCK	0	0	3315.0686	-0.196339431	-0.05885297	-0.023997307	-0.006861943	-4.613334684
62	am100	SMP	MUG	0	1	3211.4796	-0.053487863	0.000518126	0.026002883	0.033633884	-5.211214286
63	am100	MP	LIME	0	0	1851.5306	0.059918051	-0.062120582	0.000334719	0.029770612	-2.263271769
64	am100	IP	MILK	0	0	3470.6967	0.015501086	-0.004146259	-0.017121	0.044862951	8.630112187
65	am100	IF	BANANA	0	0	3988.6609	0.139542086	-0.118524654	-0.005036372	0.054217359	-18.3537591
66	am100	IP	FENCE	0	0	3582.4107	0.140407195	0.132001997	0.01402871	0.029960042	-4.892251287
67	am100	IF	LOCKER	0	0	3145.9219	-0.027077091	-0.205599181	0.034839934	0.047814693	24.9303383
68	am100	IP	CANNON	0	0	2566.8404	-0.094059472	0.1338408	0.021900401	0.032160492	-6.667535999
69	am100	MF	HOOK	0	0	3443.2994	0.045642761	-0.034042417	0.058860338	0.046318033	-6.038365555
70	am100	MP	CRADLE	0	0	3386.0134	-0.014618679	-0.094872652	-0.016145404	-0.037179879	4.648197717
71	am100	IF	ORANGE	0	0	3028.0294	0.097201992	0.105418485	-0.029663868	0.036429314	-8.323163348
72	am100	IP	GUITAR	0	0	2531.5438	0.08600657	0.16414607	-0.020944257	0.020884589	17.0805916
73	am100	IP	TIGER	0	1	3995.859	0.008099679	-0.121428305	-0.050339907	0.003752273	7.784317762
74	am100	IP	COUCH	0	1	3515.8701	-3.14E-05	0.125399503	-0.006917945	-0.001630031	8.403765951
75	am100	IF	BRAIN	0	0	2606.9584	0.178690198	0.089747282	0.057022646	0.045368946	14.4129084
76	am100	SMP	SOUP	0	0	2062.7558	-0.138587007	0.029395445	0.079396786	0.057705799	-7.441647604
77	am100	IP	ELEPHANT	0	0	3318.3984	-0.148024203	-0.084388374	-0.01192336	0.029795336	-14.05823806
78	am100	IP	DESK	0	1	2511.4054	0.083772421	0.033007704	-0.047550622	-0.013866682	2.139389339
79	am100	IF	CARROT	0	1	2741.1818	-0.002916362	-0.038919133	-0.015049483	0.008005354	-15.73640499
80	am100	IP	CEREAL	0	0	2780.776	-0.239041814	-0.193307942	-0.050314637	0.055250297	18.84864933
81	am100	MP	BONE	0	0	2875.3858	-0.242244953	0.017396103	-0.064602729	0.026029664	-17.2356714
82	am100	IF	DRUM	0	0	3333.8177	0.296003466	0.032233616	-0.012079233	-0.011198191	-18.55410906
83	am100	MP	CLOCK	0	0	2234.6364	0.231656104	0.016520997	0.041240008	0.015164437	-23.92922367
84	am100	IP	PAN	0	0	3978.4685	0.062321275	0.006564071	-0.005831056	0.013196998	6.631826814
85	am100	IP	BIBLE	0	1	3230.2596	-0.114166224	0.00168065	0.055822478	0.037176723	20.35842273
86	am100	IF	NAPKIN	0	1	2251.1197	0.150445518	0.125028751	0.006116774	0.037937934	19.84949531
87	am104	SHP	CROWN	1	0	1482.6035	-0.101429839	0.060602837	-0.002098944	0.04352023	10.94040813
88	am104	SHP	MOON	1	0	4264.8869	0.079458375	0.061204823	-0.030817778	0.032618251	2.623692187
89	am104	SHF	NAPKIN	1	0	3701.7031	-0.156876349	0.010609053	0.053092828	0.040968696	-6.14197968
90	am104	SHF	ORANGE	1	0	1724.0058	0.164660659	0.082381345	0.009691632	0.007672164	2.297114939
91	am104	SHF	CAMERA	1	0	3889.323	0.003620517	-0.026236589	0.019025116	0.032137575	13.98192553
92	am104	SHF	CEREAL	1	0	2897.2449	-0.111508925	0.038334804	-0.025666929	0.044252438	-10.71006285
93	am104	SHF	MUG	1	0	2226.2023	0.037339137	0.067703571	-0.024351163	0.025209174	8.659037449
94	am104	SHF	BROOM	1	0	1870.3316	0.174229553	0.092583853	0.001309434	-0.013024791	10.0343847
95	am104	SHP	CASTLE	1	0	3863.9713	-0.1083711	-0.048386068	0.028330166	-0.027483793	-42.9444639
96	am104	SHF	TOILET	1	0	1599.9985	0.060718109	0.180021502	0.017483475	0.041901386	6.82964631
97	am104	SHF	KEG	1	0	1966.8622	0.012994075	0.111958784	0.017589894	0.028399134	4.093884287
98	am104	SHP	HAMMER	1	0	1734.5459	0.141152649	0.349450987	-0.025376605	0.074258374	-13.17284161
99	am104	SHP	UMBRELLA	1	0	2820.8608	0.062762576	0.142615444	0.027489382	-0.049306518	18.49554671
100	am104	SHF	ARROW	1	0	1799.7511	-0.111188351	-4.92E-05	0.030575803	0.012095426	15.27009774
101	am104	SHF	OYSTER	1	0	2383.1576	0.02703401	-0.061616614	-0.03036436	-0.004779352	24.54907817
102	am104	SHP	LIZARD	1	0	3131.3714	-0.057660561	0.070544277	-0.020077264	0.034337061	6.30839397
103	am104	SHP	FLAG	1	0	1085.968	-0.042403614	-0.095418759	-0.009374108	0.087435157	24.30095907
104	am104	SHP	SHOVEL	1	0	2136.4067	-0.126971369	-0.06448168	-0.001432652	-0.051110615	-4.502847522
105	am104	SHF	SOUP	1	0	2604.33	0.17836182	0.179305395	-0.025646612	0.005282129	-1.35450022
106	am104	SHF	JELLY	1	0	1683.2752	-0.216607423	-0.056105314	0.002344245	0.022713222	-1.558891273
107	am104	SHP	BENCH	1	0	2384.6065	0.117364867	-0.01723995	0.016637701	0.055598384	28.5753814
108	am104	SHF	PENCIL	1	0	2147.1112	0.089857254	-0.041220175	0.022435917	0.018265965	9.409753432
109	am104	SHF	LION	1	0	1888.1302	0.19938138	-0.008584537	0.018839951	0.029243197	-1.414865498
110	am104	SHF	BASKET	1	0	2474.6296	0.302777123	-0.110753076	0.005960149	0.015649418	-18.36365264
111	am104	SHF	COUCH	1	0	1711.5813	0.125839752	0.222650081	0.030978074	0.02400664	13.71726741
112	am104	SHP	PAN	1	0	1546.3996	0.12623726	0.057677935	0.070338732	0.09263273	-9.442600538
113	am104	SHF	BADGE	1	0	3093.9826	0.015159995	-0.141101646	0.011195748	0.031311463	12.29084927
114	am104	SHF	MAP	1	0	1728.1602	0.018169262	0.066160788	-0.010228225	0.021333629	6.715795266
115	am104	SHP	VIOLIN	1	0	3285.3616	-0.061483265	0.011771706	0.005735738	0.023094865	8.676993677
116	am104	SHF	MITTEN	1	0	2214.4696	0.107613042	0.02528144	0.016783091	-0.006541029	-13.00661706
117	am104	SHP	CHEESE	1	1	1548.404	0.11183856	-0.022630146	-0.016196913	-0.044603167	-5.347996714
118	am104	SHF	PENNY	1	0	1856.9989	-0.263964108	-0.263954829	-0.01630641	0.017470652	30.3462458
119	am104	SHP	SPOON	1	0	2925.4683	0.18701783	0.111526203	0.038599305	0.02788604	-23.75010058
120	am104	SHF	PIANO	1	0	1501.2764	-0.182781717	-0.107681983	0.015456284	0.005625724	-9.45310889
121	am104	SHP	TRACTOR	1	0	2118.0788	-0.134978319	0.088273873	0.012885692	0.026119125	-10.89871815
122	am104	SHF	DOLL	1	0	1473.3817	-0.158018514	-0.034397386	0.034255417	0.042750008	-5.375489874
123	am104	SHF	OVEN	1	0	3273.8545	-0.032716153	0.057439938	0.032300063	0.040939085	-0.19269313
124	am104	SHF	TOWEL	1	1	1965.3271	0.006355025	-0.022861151	0.038293012	0.028631823	13.41967081
125	am104	MF	SHOWER	0	0	1895.0785	0.089136798	0.167204722	0.019387331	0.025350978	3.159222214
126	am104	MP	FORK	0	0	3019.3356	0.084193735	0.130518382	0.02678893	0.025544124	8.22704886
127	am104	SMF	TIGER	0	0	3240.4663	-0.116291507	-0.032686873	-0.002464998	0.01377699	-11.45987565
128	am104	SMP	LAMP	0	0	3484.6969	-0.01160598	-0.044276129	-0.036034272	0.00578092	-10.85103283
129	am104	MF	MOTH	0	0	1822.8875	-0.256536965	-0.042303259	-0.009452691	-0.007309064	-12.66992935
130	am104	SMF	BANANA	0	0	3257.7531	-0.014305281	-0.02261149	0.024730992	0.059966864	10.48224264
131	am104	SMP	ELEPHANT	0	0	2124.0866	0.125059902	0.038301924	0.030389634	0.012850829	-41.21924282
132	am104	MP	TRUMPET	0	0	1765.724	-0.090651307	-0.044597367	0.045426041	0.058540162	-0.010587927
133	am104	SMP	DEER	0	0	1329.4958	-0.015136994	0.02881092	-0.001251309	-0.022210104	-18.71579039
134	am104	SMP	SCISSORS	0	0	3004.8419	-0.091270031	0.076372888	0.066254912	0.056924601	6.12040797
135	am104	SMF	CLOCK	0	0	3763.9888	0.051863963	0.153557024	-0.027793113	0.018581487	13.18955428
136	am104	MP	PAIL	0	0	2288.4387	-0.121488352	0.100250216	0.001488124	0.004856214	-11.84595315
137	am104	MF	PIGEON	0	0	3789.1134	0.057859561	0.166035043	-0.00521897	0.04077898	-4.729480785
138	am104	SMP	MANURE	0	0	2901.2855	0.116823094	0.090678204	0.027509795	0.085568924	19.70026881
139	am104	MF	KNIFE	0	0	3004.8647	0.017428236	-0.032176441	-0.028835851	0.03295916	-5.639697266
140	am104	SMP	ANCHOR	0	0	1793.4135	0.010863462	-0.021033336	-0.012727456	-0.02969722	7.918890565
141	am104	SMF	FAN	0	0	2517.6702	-0.190588014	-0.149529489	-0.034947486	-0.046746378	20.97892968
142	am104	MP	LADDER	0	1	1718.2839	-0.014054046	0.015635275	-0.017906167	0.016503301	-3.93518283
143	am104	SMP	PLATE	0	0	1701.909	-0.214757897	-0.156062696	-0.007902239	0.0058284	1.875115524
144	am104	SMF	GOAT	0	0	2821.527	0.146551012	0.098280652	0.016746695	0.037249925	-15.96054273
145	am104	SMP	BACON	0	0	1749.4125	-0.120809425	0.02737877	-0.003676129	-0.007472415	21.64308077
146	am104	MF	PARADE	0	0	2371.9497	0.044602118	0.043158387	-0.023863813	0.001868575	13.01228753
147	am104	SMP	KETTLE	0	0	2526.7349	0.167705125	0.067438843	-0.023480885	0.062337061	4.468726458
148	am104	SMP	DOLLAR	0	0	2842.8481	-0.103334443	-0.053529791	-0.009829913	0.057241114	-14.63720139
149	am104	SMP	QUILT	0	0	4666.34	0.096898939	-0.011791793	0.026313171	0.059708769	3.847283014
150	am104	SMP	MONKEY	0	0	3131.5405	0.114742826	0.105747819	0.016151938	0.037283769	-9.571006288
151	am104	MP	WALLET	0	0	3027.445	-0.076584436	-0.015742384	0.029444923	0.050301069	13.93748609
152	am104	SMF	MUFFIN	0	0	2930.6423	-0.035483707	0.114539736	0.005088778	0.007999747	12.36825321
153	am104	SMF	PILLOW	0	0	1936.4164	-0.077193443	0.150630828	0.023826331	-0.03719219	2.159752784
154	am104	SMP	CANE	0	0	1791.6841	0.098106644	0.031801463	0.018027538	0.07840219	-6.500245515
155	am104	IP	COFFEE	0	0	2291.7201	-0.022446428	-0.019105163	-0.034592201	0.01885806	0.653483134
156	am104	IP	BOOT	0	0	1633.7797	-0.22659489	0.048907048	0.000502659	0.026324697	-16.9130858
157	am104	MP	PURSE	0	0	2709.3476	0.396773592	0.203204754	0.092931081	0.086874611	-42.21623689
158	am104	SMF	TROPHY	0	0	4341.447	0.223189217	0.192088372	0.012591975	0.043740928	35.9519115
159	am104	MP	FLASK	0	0	2459.5421	-0.483128701	-0.120893833	-0.038614761	-0.037686704	5.544098138
160	am104	IP	RABBIT	0	0	3455.9892	-0.23173494	-0.063554708	-0.002944735	0.024496816	-8.497896936
161	am104	SMP	WOLF	0	0	1595.671	0.465476981	0.080857255	0.066930906	0.005469197	-32.424627
162	am104	SMF	OMELET	0	0	3870.0491	0.036918389	0.063719377	0.02905409	0.027927528	-10.59151018
163	am105	SHF	DIAMOND	1	1	3711.3275	-0.10002928	-0.059553768	-0.004476868	-0.010413191	-10.18284757
164	am105	SHP	STOOL	1	0	3542.686	-0.037742441	0.058320981	0.048371002	0.006443496	10.99665467
165	am105	SHP	KETTLE	1	0	3484.3222	0.187502118	0.122788059	0.060053811	0.054340256	12.04615661
166	am105	SHP	TOWEL	1	0	2406.0317	0.040107613	-0.033004752	-0.040030949	-0.002627221	4.157683756
167	am105	SHF	MOUSE	1	0	4339.1511	0.192700235	0.175277608	0.037826203	0.022409297	-0.324627968
168	am105	SHP	DOLLAR	1	0	3140.9622	0.086206167	0.0060663	0.026278893	0.000761796	12.82950054
169	am105	SHP	TAXI	1	0	3372.5309	0.009533254	0.193108706	-0.078062497	-0.009729512	36.06214706
170	am105	SHF	ORANGE	1	0	3171.0814	0.199479449	0.257764025	0.005629303	0.010741021	27.67333412
171	am105	SHF	SOUP	1	0	4440.4684	0.108254723	0.095405622	0.022785251	-0.013768771	12.00942154
172	am105	SHF	FENCE	1	0	2378.4318	0.003280442	-0.039742922	0.044373191	-0.009959928	-9.399112408
173	am105	SHP	STRING	1	0	3556.8997	0.039428602	0.015990868	0.017591789	0.043424107	3.169921694
174	am105	SHF	BIBLE	1	1	2208.5517	0.059898108	-0.046396597	0.03373915	0.017426065	20.76685721
175	am105	SHF	NET	1	0	2210.4364	0.050937325	-0.067891421	0.034687907	0.030538098	11.54394673
176	am105	SHP	PYTHON	1	0	3101.4323	0.121093369	0.113382842	0.043977138	0.022305791	9.766047967
177	am105	SHP	ELEPHANT	1	1	3538.6286	-0.016848085	-0.04107135	0.028001276	0.058338698	25.91285465
178	am105	SHF	CEREAL	1	0	2273.7898	-0.016865083	-0.069915034	0.01914898	-0.0189142	24.44326489
179	am105	SHF	STAR	1	0	2576.6603	-0.292711104	-0.147661981	-0.034420479	-0.035822841	8.18050154
180	am105	SHP	JACKET	1	1	3240.8113	-0.13125407	-0.095095065	0.033594855	-0.007148312	11.42531901
181	am105	SHP	OYSTER	1	1	2798.2456	0.193249253	0.02794388	-0.018994493	-0.042666022	25.45129956
182	am105	SHF	BUTTER	1	0	4260.1344	-0.063023569	-0.175501244	0.025052534	0.036845112	-6.429144313
183	am105	SHF	DUCK	1	0	4336.2364	0.072583118	0.243244515	-0.006173346	0.033486689	19.17258526
184	am105	SHF	CROWN	1	0	4474.7032	0.309763083	0.143315045	0.061724474	0.023991083	2.560645195
185	am105	SHF	ANCHOR	1	0	2949.9675	-0.024087375	0.095163504	0.068293115	0.033776261	4.535574632
186	am105	SHF	ROPE	1	0	2145.2775	0.125935844	-0.078817342	0.042761869	0.011937537	22.98734452
187	am105	SHF	MOTH	1	0	4841.7524	-0.120627003	0.067344212	0.039486433	0.018041035	-12.98964719
188	am105	SHF	FLASK	1	0	4363.2802	0.112698761	0.238374496	0.002547109	0.042967202	39.00598756
189	am105	SHP	POTATO	1	0	3468.5883	-0.051647266	-0.038443274	0.010845282	0.009491126	1.474387236
190	am105	SHP	PIGEON	1	0	4120.9447	-0.20918574	-0.29001012	0.058633539	0.045522027	15.19482119
191	am105	SHF	MAGNET	1	0	4548.5146	-0.028423505	-0.06771786	0.00040471	0.002308723	11.45029152
192	am105	SHF	BRAIN	1	0	3028.0707	-0.25947493	-0.145045752	-0.011971147	0.010798239	-1.094365954
193	am105	SHF	TIGER	1	0	4030.4942	0.126438642	0.149215613	-0.012576102	0.012825267	15.13784111
194	am105	SHP	VIOLIN	1	0	3582.6217	-0.153887208	-0.085703209	-0.025981965	-0.001313143	14.55620068
195	am105	SHF	KNIFE	1	0	3734.0712	0.161468381	0.138806946	0.024495805	0.023202889	-6.010621785
196	am105	SHP	CIGAR	1	0	3323.2628	0.236492487	0.145334884	0.041469352	0.038977795	-5.623997961
197	am105	SHF	HAM	1	0	2655.995	0.076336383	-0.124539993	-0.007333204	0.030471004	18.39935525
198	am105	SHF	WHIP	1	0	2754.3289	0.266891832	0.038466777	0.056534413	0.009694709	10.25626368
199	am105	SHP	SPOON	1	0	4154.9046	0.161108366	0.047088371	0.060242196	0.01049175	1.943119296
200	am105	SHF	MUFFIN	1	0	3626.8765	0.204378314	0.086174558	0.024867923	0.022669304	11.46856655
201	am105	SHP	TOILET	1	0	3655.8685	-0.086515554	-0.027297906	-0.056642701	-0.013926036	16.31071568
202	am105	SHF	KITTEN	1	0	4518.9521	-0.168324442	-0.023680204	0.009070517	0.020150249	-9.357383234
203	am105	SHP	PAN	1	0	3399.166	0.115791317	0.160352971	0.013307241	0.0024246	-14.12681343
204	am105	SHF	COFFEE	1	0	4346.1597	0.028854475	-0.048693137	0.050667432	-0.002070118	7.838937715
205	am105	SHF	PAIL	1	0	4417.3039	0.162358883	0.226943015	-0.013885449	0.029444464	-10.14920082
206	am105	SHP	SWORD	1	0	3124.5971	0.164089817	-0.084162622	0.013381324	0.009483194	11.27396518
207	am105	SHP	CAGE	1	0	4828.3918	-0.105664999	0.042204618	-0.042061889	-0.003771946	-14.05506009
208	am105	SHF	CHICKEN	1	0	2791.7924	0.186985628	-0.193566525	-0.028027048	0.004941723	16.62398207
209	am105	SHP	CASTLE	1	0	4325.2233	0.039804386	-0.234462575	-0.013275268	-0.011359946	-2.73861771
210	am105	SHF	BASKET	1	0	4021.2808	-0.066701481	0.021864295	-0.004138031	-0.000863876	-4.431477671
211	am105	SHP	BALLOON	1	0	4080.6049	-0.018987071	-0.005023025	0.028655112	0.011583412	21.18822244
212	am105	SHF	CAPE	1	0	4510.409	-0.029819393	-0.15266476	0.039824718	0.018920007	-0.13965176
213	am105	SHF	CANOE	1	0	2428.9919	-0.159756707	-0.124957493	-0.024467594	-0.030863786	-7.00243449
214	am105	SHP	RAILROAD	1	0	4529.7654	-0.102011133	0.063958696	0.000495671	0.01498174	2.349980462
215	am105	SHF	SEAL	1	0	3822.2449	-0.046016877	0.010917746	0.056230127	0.002301579	5.259136123
216	am105	SHP	BARREL	1	0	3100.7966	0.198242214	0.139028993	0.004400832	0.002329278	17.93716087
217	am105	SHP	CHERRY	1	0	3880.1096	-0.050610892	-0.035743969	0.04544376	0.0294055	-23.1003846
218	am105	SHF	CARROT	1	0	2066.8775	-0.136950127	-0.102087168	-0.039687752	-0.004971385	5.581762659
219	am105	SHP	GLASSES	1	0	3490.8788	0.110371484	-0.060477441	0.061581854	0.044921341	25.37235159
220	am105	SHP	CRADLE	1	0	3054.1018	0.025451722	-0.09488175	-0.02826049	-0.020222326	8.104917336
221	am105	SHP	LION	1	0	4216.3758	0.091913723	0.047461148	0.036821171	0.041093599	16.98421567
222	am105	SHF	CANDLE	1	0	4895.7007	0.040991978	-0.045080628	-0.028485674	-0.015892367	14.81829851
223	am105	SHP	NEEDLE	1	0	3092.4981	0.121726234	-0.035954438	0.071558755	0.057794594	16.14714478
224	am105	SHF	FAN	1	0	2892.4195	-0.178385143	-0.161217643	0.008880815	0.047289502	8.793887856
225	am105	SMF	RABBIT	0	0	4288.3107	0.231505423	0.146154718	0.030336732	0.020766843	19.78179304
226	am105	MF	LAMP	0	0	2052.1881	-0.019965378	0.225676595	-0.031436441	-0.00118596	5.780293742
227	am105	MP	TOAST	0	0	4333.4295	-0.164574555	0.091449132	0.017157428	0.022987342	10.20116148
228	am105	SMP	MAP	0	0	3226.7852	-0.019535611	0.091003533	-0.000628079	0.000872718	8.800254837
229	am105	SMP	DEER	0	0	4058.5012	-0.100642706	-0.034913973	-0.01210094	-0.001944193	27.07450934
230	am105	SMP	HOOK	0	0	3862.0122	0.170448491	0.190029875	0.017298533	0.021442028	0.165572051
231	am105	SMF	PENNY	0	0	3364.9671	-0.081563216	-0.170767304	-0.008069862	0.008828691	-1.065068307
232	am105	SMP	MUSTARD	0	0	2840.5139	0.078804026	0.098176669	0.022165112	0.010538706	20.39852334
233	am105	SMF	TRAY	0	0	3454.6235	0.077561127	0.199554275	0.009058258	0.021974818	-5.764307073
234	am105	MF	OTTER	0	0	3175.0322	-0.167207689	-0.067065424	0.010252016	0.00787154	25.14365564
235	am105	IP	PLATE	0	0	3297.435	-0.038067139	-0.199205651	0.018093116	0.000775528	-13.62456196
236	am105	IP	BADGE	0	0	4287.0764	0.027666527	0.030838871	0.00637635	0.015776063	-27.64255221
237	am105	SMP	MITTEN	0	0	4403.6013	0.081102091	0.056684044	0.016946084	0.006435273	1.72151554
238	am105	MP	SOAP	0	0	3723.2237	-0.190443962	-0.038090451	0.01669817	0.012208093	5.620702205
239	am105	SMP	SOCK	0	0	4228.1768	0.059951051	0.078573201	-0.040765353	-0.020284349	-12.25673263
240	am105	SMF	BROOM	0	0	3910.5335	0.226471699	0.13507157	-0.022925706	-0.011660928	10.00169254
241	am105	IF	APPLE	0	0	4211.0887	0.002718058	-0.100502719	-0.056568035	0.007940966	11.59956534
242	am105	SMP	LIZARD	0	0	3486.1079	-0.109464512	-0.191430749	-0.014120453	0.007049478	-10.93355314
243	am105	SMF	CRAB	0	0	3429.2736	0.095924783	0.339305819	0.004114194	-0.023946254	-3.301691856
244	am105	IF	PHONE	0	0	4212.2955	-0.09897798	-0.026416535	0.005292713	0.014766169	-7.848330535
245	am105	IF	BELL	0	0	4502.5412	-0.035802681	-0.366043945	0.011309086	0.007954517	-1.018076559
246	am105	SMF	NEST	0	0	3865.1704	-0.214004557	-0.129036921	-0.015243235	0.013913324	-25.87397374
247	am105	SMP	KEG	0	0	4325.2683	-0.066781831	0.067098787	-0.008751887	0.012425816	-4.083087641
248	am105	IF	COUCH	0	0	4408.2949	-0.140300278	-0.029466311	0.038909005	0.015378399	-4.752510744
249	am105	SMP	TIRE	0	0	4584.5246	-0.029165339	0.005480627	0.027534006	0.023119468	0.10915195
250	am105	MP	MUG	0	0	2788.9179	-0.036258776	0.038161682	0.001065512	0.032455254	9.244381645
251	am105	SMF	OVEN	0	0	3147.4799	0.010852576	0.060230935	0.003525316	0.017464299	-8.820000137
252	am105	IP	SHOVEL	0	0	4828.4091	-0.046134435	0.147320654	0.024164978	-0.007670761	12.94783578
253	am105	SMP	PIE	0	0	4961.407	0.326099237	0.049610818	0.008927179	0.004113809	-3.963039016
254	am105	IF	DOLL	0	0	4397.3816	-0.043561288	-0.131198275	-0.011938304	0.00205759	-19.18582854
255	am105	MP	QUILT	0	0	4470.0967	0.108160875	-0.054644457	-0.016711488	-0.022122246	-35.49391632
256	am105	IF	GUITAR	0	0	4233.2195	-0.163638544	0.020238591	0.01179359	0.014203152	21.88874143
257	am105	IP	PENCIL	0	0	2955.8671	0.175444184	0.324518588	-0.018832599	-0.027324467	13.85441474
258	am105	MF	HIGHWAY	0	0	2705.4175	-0.077129211	-0.082499334	-0.017936343	0.005724628	-2.694382275
259	am106	SHF	NET	1	1	2374.7235	0.316832439	0.295776306	0.004469061	0.040573371	11.61179839
260	am106	SHP	MAGNET	1	0	2885.3441	-0.098114049	0.021919807	0.036709271	0.022388718	7.623873817
261	am106	SHF	JACKET	1	0	3706.5817	-0.109223106	-0.192920804	0.034918722	0.052307849	-2.454881807
262	am106	SHP	SOUP	1	0	3312.3397	0.105200334	0.180395104	0.066667086	0.041385538	-6.990958317
263	am106	SHF	CANNON	1	0	3078.7357	0.116472503	0.114260244	0.017876325	-6.37E-05	-18.32263321
264	am106	SHP	BRAIN	1	0	3975.3478	-0.097497444	0.099326464	0.146305743	0.073397552	17.08066628
265	am106	SHF	DIAMOND	1	0	2271.2258	-0.164305532	-0.01633417	0.020772566	0.023420296	7.448829176
266	am106	SHP	DEER	1	1	2316.879	-0.032980878	0.068603963	0.01862094	-0.0419571	25.55933534
267	am106	SHF	WALLET	1	0	3050.425	0.25316909	0.122972223	0.020193354	0.033616894	18.3488834
268	am106	SHP	CASTLE	1	0	1963.8194	0.214490912	0.150013699	0.105979425	0.059795258	4.803013342
269	am106	SHF	KEG	1	1	1609.0353	0.10001281	0.173831249	0.013885568	0.050992226	26.58935058
270	am106	SHF	BONE	1	1	2007.685	0.0887637	0.262476681	0.017015953	0.053886958	0.118427581
271	am106	SHF	BOWL	1	0	2525.6759	0.163475868	-0.027294226	-0.038138927	-0.029254518	-19.13077537
272	am106	SHF	DESK	1	1	2151.7603	-0.119784731	0.07041792	0.033947529	0.029663462	-2.855693191
273	am106	SHP	DUCK	1	0	2138.4696	-0.314694527	-0.333472868	0.066772336	-0.052311639	-10.17651387
274	am106	SHP	OVEN	1	1	2478.193	0.064701663	0.167307336	-0.057897819	-0.077238322	8.846472622
275	am106	SHF	SPONGE	1	0	2202.2468	0.135249707	0.131587798	0.065885748	0.062639064	-12.48863554
276	am106	SHF	COUCH	1	1	2184.7206	0.249634261	0.072398653	0.021244359	0.001737001	9.53465269
277	am106	SHF	PAN	1	0	2150.6985	-0.051054334	0.142411303	-0.00954923	0.0631153	-21.57987686
278	am106	SHP	MAP	1	1	2089.8434	-0.100349294	0.147499922	0.096188324	0.061548192	-8.903551006
279	am106	SHF	FAN	1	0	2640.0355	0.24520679	0.170061255	-0.002704069	0.037618832	-13.27741015
280	am106	SHP	CANE	1	0	3053.1403	-0.145414614	-0.099767078	0.07503888	0.066148867	2.042000244
281	am106	SHF	OYSTER	1	0	1773.4348	0.370905967	0.16781731	0.025635838	0.040323977	16.42142339
282	am106	SHF	MOTH	1	0	2855.6485	0.003955169	0.036169064	0.03811383	0.064592147	17.83244259
283	am106	SHF	HONEY	1	0	2491.6171	-0.103057337	-0.052764726	0.029579486	0.0646915	-18.35242445
284	am106	SHF	ENVELOPE	1	0	1608.9358	0.068848277	0.024977425	0.080448446	0.092880918	16.35524986
285	am106	SHP	CANOE	1	0	1872.6406	0.211408404	0.107507856	0.136322283	0.026712327	33.18427446
286	am106	SHF	LADDER	1	0	2572.057	-0.255221553	-0.120435542	0.005766318	0.004880332	1.629272822
287	am106	SHP	TURTLE	1	0	2682.748	-0.026109241	-0.076849243	0.059010912	0.01268477	25.43378309
288	am106	SHF	LAMP	1	0	3008.0402	0.021635772	0.095899803	0.014561899	0.001450926	-16.68650973
289	am106	SHP	BALLOON	1	0	2834.4373	-0.059647987	0.022205911	0.02201721	-0.021401517	-17.41121869
290	am106	SHF	PAIL	1	1	3040.0846	0.112608203	0.177626983	0.042949238	0.035074365	10.9852303
291	am106	SHF	BIBLE	1	0	3300.4488	0.090518868	0.142152187	0.062892371	0.070622675	-3.638774065
292	am106	SHF	POTATO	1	0	3227.1546	-0.329824115	-0.103379639	0.028850773	-0.001734482	17.54151977
293	am106	SHP	CAPE	1	1	2597.2662	0.158242256	0.137651539	0.075034011	0.056465928	11.22321539
294	am106	SHP	FLAG	1	0	1830.2852	0.059699371	0.27233663	0.028548716	0.072762617	33.35066102
295	am106	SHF	SHOVEL	1	0	1819.4907	0.016511701	0.004680456	0.020598794	0.044839281	-0.424677273
296	am106	SHF	TOWEL	1	0	2912.8866	-0.020218114	-0.068015859	0.017974285	0.054358038	-37.23538391
297	am106	SHF	FLASK	1	1	1940.2222	-0.052276752	-0.003512364	0.085075899	0.071410535	-16.94700743
298	am106	SHF	ROSE	1	1	3059.2785	0.104962191	-0.024266667	0.015199955	0.012256545	26.08939308
299	am106	SHF	CARROT	1	0	1970.7111	-0.358789331	-0.063901322	-0.019939089	-0.041054312	-1.474565421
300	am106	SHF	PYTHON	1	0	1705.7287	-0.130438579	-0.011821978	-0.000271572	-0.041420823	22.37501907
301	am106	SHP	CAKE	1	0	3008.2209	0.222298548	-0.015627046	0.072436633	0.033602862	-16.39588545
302	am106	SHF	CHEESE	1	0	2206.1593	-0.015379721	0.075348305	0.012408096	-0.007346978	-6.290841993
303	am106	SHF	SWORD	1	0	1946.5323	0.051212573	0.070565051	-0.000734789	0.01601303	-12.29577706
304	am106	SHF	TAXI	1	1	1715.7377	0.111246386	0.15218434	0.004992609	0.03321798	-3.797595044
305	am106	SHP	NEEDLE	1	0	2930.722	0.114179673	0.093775591	0.106415107	0.020621098	2.88855775
306	am106	SHF	PURSE	1	0	2310.7798	0.268326893	0.111606882	0.018512504	0.033389152	-6.725987981
307	am106	SHF	HAM	1	0	2548.8534	-0.224305052	-0.25158384	-0.059063379	-0.028238138	0.754366429
308	am106	SHP	TRACTOR	1	1	2483.1388	-0.060044122	0.030534785	0.077333546	0.05301926	0.256806125
309	am106	SHF	CRAB	1	0	2636.0509	-0.181955111	-0.129354354	0.018042818	0.038276999	14.63063193
310	am106	SHF	CORN	1	1	2832.0814	-0.062229266	-0.041421283	0.03473584	0.02878521	-11.39937146
311	am106	SHP	ANCHOR	1	0	2871.4949	0.210444524	0.025362543	0.016097916	0.024771515	-17.92709419
312	am106	SHF	MOON	1	1	2536.8864	-0.07891065	-0.088504259	0.018468995	0.055546994	15.86344964
313	am106	SHF	BACON	1	0	1935.4148	0.354832457	0.257008044	0.053519569	0.087532457	10.87461778
314	am106	SHP	JELLY	1	1	2752.4313	-0.152520558	0.139642046	0.070748145	0.049226045	43.27520965
315	am106	SHP	SHEEP	1	1	2590.45	0.104465542	0.154788407	0.025864142	0.070954571	6.057682799
316	am106	SHP	LION	1	0	2735.8487	-0.029656615	-0.037426347	0.073231418	0.029129646	-17.78922104
317	am106	SHF	NEST	1	0	3355.4586	0.072639576	0.148153186	-0.024756795	0.019950435	-28.67355077
318	am106	SHF	PIANO	1	0	2849.2128	0.318687012	0.236616089	0.04078119	0.051624082	-9.330101893
319	am106	SHP	SCISSORS	1	0	2752.0558	0.139115302	-0.168739601	0.091411862	-0.008787868	8.246442995
320	am106	SMP	KNIFE	0	0	3210.3786	0.095144482	-0.018551999	0.083834	0.084157833	-6.593276922
321	am106	SMF	PIGEON	0	0	2930.2528	-0.134274108	0.144381834	0.101483468	0.037185275	-14.16396223
322	am106	SMF	WHIP	0	0	3350.6398	-0.085390284	0.084891631	0.043186431	0.032403376	7.029261292
323	am106	MP	MUG	0	0	3371.342	0.123230289	0.110575572	0.024306181	0.041665572	-4.368430154
324	am106	MP	DRUM	0	0	3165.4253	-0.008983365	0.123686692	0.040502798	0.017417056	11.02959589
325	am106	MP	PHONE	0	0	2438.8868	-0.156002617	0.010338526	0.058405818	0.018708829	-0.321296768
326	am106	MF	CRADLE	0	0	1535.4492	0.140109571	0.13803525	0.025954347	0.013023908	32.53418197
327	am106	MF	MILK	0	0	3019.2041	-0.018157923	0.03654872	-0.018305441	0.016887102	3.172438969
328	am106	MP	HOOK	0	0	3037.123	0.141966061	0.065229318	-0.001230821	0.030520139	-0.324769286
329	am106	IF	TOAST	0	0	2887.516	-0.028444077	-0.112058072	0.039369293	0.042488316	12.2075948
330	am106	SMF	FENCE	0	0	3299.9859	-0.055447059	-0.048606117	-0.088695836	-0.001156616	0.014534499
331	am106	MP	SOAP	0	0	3435.1944	-0.35039148	-0.129076005	0.008453216	0.01800037	-2.09558572
332	am106	SMP	CAMERA	0	1	2474.6127	0.004152061	0.310679672	-0.013383237	-0.031077148	3.465721685
333	am106	SMF	TRUMPET	0	0	2791.6303	0.038161733	0.165020758	-0.040254755	-0.002418484	-7.846892547
334	am106	SMP	SHOWER	0	0	2671.7773	0.268739674	-0.037012971	0.034582313	-0.008144209	22.61304093
335	am106	SMP	STAR	0	0	2498.9626	0.089931317	0.108525422	0.044500642	0.031076401	1.11336697
336	am106	MP	CLOCK	0	0	3652.2473	-0.154184019	-0.139546723	-0.003922799	0.012518299	16.58278731
337	am106	SMF	DOLLAR	0	1	3159.495	0.307329018	0.227415464	0.061897576	0.006917676	14.41399496
338	am106	SMP	ROPE	0	0	2616.2925	-0.028627896	0.048243449	-0.00086538	-0.012587546	10.57178496
339	am106	SMF	STRING	0	1	2621.6335	0.03181133	0.059139394	0.037113409	0.035926379	-0.625080748
340	am106	MP	HAMMER	0	0	2366.4001	0.136319435	-0.052619494	0.073372405	0.043718261	-16.63156827
341	am106	MP	ARROW	0	0	3595.3635	-0.120535072	0.257510275	0.035520932	0.052827962	44.60330331
342	am106	MP	ORANGE	0	0	2427.9869	0.044824731	0.069477835	0.034491679	0.050434572	-15.34801982
343	am106	SMP	CROWN	0	0	2944.6483	0.15642745	0.137563105	0.013543558	0.039740923	4.258221235
344	am106	SMP	GOAT	0	1	2401.8402	0.149261485	0.12407449	0.027192701	0.066813117	5.787841198
345	am106	SMF	WOLF	0	0	2529.892	0.050362861	0.029024021	-0.036065822	0.001810433	-10.0992421
346	am106	MF	CHICKEN	0	0	2596.3103	0.049400307	0.088909121	-0.054361716	0.005100891	24.66568782
347	am106	SMP	MUSTARD	0	0	2952.3251	0.388574911	0.198336787	0.048399398	0.018241681	-18.69208395
348	am106	SMP	DOLL	0	0	2076.3897	0.367992245	0.085522462	0.075725322	0.029386899	-20.84480952
349	am106	MF	TIGER	0	0	1400.2832	0.196157518	0.036021592	-0.036943595	0.009407513	-19.83316864
350	am106	SMP	PILLOW	0	0	2351.404	-0.118727694	-0.063818463	-0.01213884	0.004106913	-7.970437626
351	am106	IF	SEAL	0	0	3209.0467	0.115816276	0.135303087	-0.040801343	0.00681603	11.65296872
352	am106	SMP	VIOLIN	0	0	2820.1011	0.16572147	-0.071862856	-0.014024665	0.005107703	-3.112714956
353	am106	SMP	PIE	0	1	2114.6205	-0.082399493	0.0390886	0.054656821	0.016457909	-21.09242759
354	am106	SMF	STOOL	0	0	3386.3831	0.031358308	0.120828762	-0.011316993	0.006309077	16.84002438
355	am106	SMP	LIME	0	1	4163.7086	0.194105157	0.094753523	0.065536606	0.051425871	-8.396592343
356	am106	SMF	APPLE	0	0	2486.6682	-0.032757791	0.060694306	-0.066224248	-0.021050852	0.792760721
357	am106	SMP	BANANA	0	0	2243.0334	0.226800037	0.161321877	0.049380663	0.036764979	21.84056928
358	am106	SMF	CEREAL	0	0	2099.1345	0.013832571	-0.000388545	0.02152849	-9.43E-05	-25.31088605
359	am106	SMP	MANURE	0	0	2434.6622	0.18190919	0.054658675	0.02908824	0.024423012	-7.432671192
360	am106	SMP	KITTEN	0	0	2689.5181	-0.174080493	-0.184343201	-0.001448109	0.039593141	-20.11370938
361	am106	IF	FORK	0	0	2796.1156	-0.124811489	-0.066632542	0.025398475	0.021364036	-4.559075421
362	am106	SMP	CAGE	0	0	2622.8157	-0.195524623	-0.140495961	0.028179404	0.012054003	-11.60333042
363	am106	MP	PAINTBRUSH	0	0	1421.3986	-0.453977326	-0.122382387	-0.017189398	-0.002111541	-13.19160298
364	am106	MF	MUFFIN	0	0	2181.8208	-0.023084014	0.027859476	0.007499144	-0.010102401	-0.426542911
365	am106	SMP	CIGAR	0	0	3796.7256	0.122677728	0.084924466	0.050360026	0.027515759	7.47039767
366	am106	SMP	LIZARD	0	0	2433.9715	-0.033857177	-0.127223854	0.07994299	0.027180894	27.08372104
367	am106	SMP	CANDLE	0	0	3095.3804	0.150742906	0.001171378	-0.021057189	-0.000920142	8.263513026
368	am106	SMP	BROOM	0	0	2831.8247	-0.093744227	-0.020606932	0.021512827	-0.011774406	14.01934103
369	am106	SMF	ELEPHANT	0	0	2509.0408	0.173784793	0.092575438	0.024001035	0.026079222	-1.79863094
370	am106	IP	ROCKET	0	0	2751.875	-0.038216602	0.005566772	0.050805616	0.039743744	-7.83705231
371	am106	SMF	RAILROAD	0	1	2612.9532	-0.049273496	-0.111679155	0.034928547	0.056126276	-3.306013893
372	am106	SMP	QUILT	0	0	3111.9757	0.209505004	0.102526153	0.034715718	0.022344726	34.04775477
373	am106	SMP	GUITAR	0	0	2307.1053	-0.015987815	0.039417312	0.031579016	0.025949855	10.13662253
374	am106	IF	NAPKIN	0	0	2570.7578	-0.152841144	-0.051914987	0.009595322	0.025302785	-15.91741538
375	am107	SHF	CHICKEN	1	0	2046.5651	0.162534639	0.133515544	-0.00671836	-0.000281394	-5.473730255
376	am107	SHF	MONKEY	1	0	1940.3986	-0.033815635	0.061311879	0.015141473	0.025999194	-1.398550237
377	am107	SHF	CAGE	1	0	1988.8783	-0.044065304	0.097732659	0.010993988	-0.007233511	-10.66891539
378	am107	SHF	TRUMPET	1	0	2380.9343	-0.047981766	-0.06141148	0.004328884	0.00290896	9.630775156
379	am107	SHP	CEREAL	1	0	2242.1319	-0.003190507	0.068898891	0.020177578	0.011240795	-0.731495248
380	am107	SHP	MUG	1	0	2176.849	-0.020860415	-0.051629149	-0.005460365	0.017218756	-34.10742561
381	am107	SHF	ARROW	1	0	2851.9081	-0.120539582	-0.000630127	-3.33E-05	-0.009540392	3.940560096
382	am107	SHF	TURTLE	1	0	2373.4625	-0.00166911	0.117724527	0.007644114	0.020959892	28.67488472
383	am107	SHP	BARREL	1	1	1904.8386	0.003082558	-0.05404773	0.012435995	-0.014841061	20.31827017
384	am107	SHF	HONEY	1	0	1902.7941	0.014224522	-0.124652763	0.022190651	0.040585795	-13.94415464
385	am107	SHF	OTTER	1	0	2661.9695	0.014546051	0.033308241	0.018236188	0.021421622	-19.64182275
386	am107	SHF	SYRUP	1	0	1405.1276	0.224361532	0.100704711	0.024684164	0.023821859	22.4376605
387	am107	SHF	JELLY	1	0	2471.4811	0.161011708	0.218376219	-0.004170779	0.030117406	-7.695206906
388	am107	SHF	DUCK	1	0	2064.6606	0.240245906	0.208973026	-0.000281935	-0.015721808	-14.58991151
389	am107	SHF	TOWEL	1	0	2860.0935	-0.191390787	-0.029114282	0.00199228	-0.005832438	-5.348148412
390	am107	SHP	CRAB	1	0	2493.4377	-0.045898299	-0.073857761	0.008622461	0.013187988	-1.359938751
391	am107	SHF	MAP	1	0	2674.2367	-0.043173773	0.03646625	0.035928186	0.022976902	-15.68456271
392	am107	SHP	BRAIN	1	0	2264.4538	-0.001700654	-0.027413853	0.022165211	0.025916298	18.5543321
393	am107	SHP	CANE	1	0	2728.5378	0.02919971	-0.001510351	0.02140442	0.039026928	-0.545829271
394	am107	SHF	GOAT	1	0	3531.5892	0.044679388	0.109412152	0.041430107	0.041156017	-5.686568543
395	am107	SHF	MOON	1	1	2060.454	-0.008470075	0.031998469	0.053901201	0.012011575	8.801126526
396	am107	SHF	PENCIL	1	0	1789.6307	-0.045956005	0.150165368	0.02160523	0.042043315	-5.857530829
397	am107	SHP	CROWN	1	0	2463.9503	0.072067545	0.015606388	-0.028105074	0.043991808	-0.593898456
398	am107	SHP	MUSTARD	1	0	1930.9257	0.127802061	0.0747841	-0.035189777	0.01964224	-6.705293253
399	am107	SHP	CASTLE	1	0	2261.6317	-0.126826761	-0.043486307	-0.001262087	0.003176661	-9.188806163
400	am107	SHF	ANCHOR	1	1	2158.4898	0.114768969	0.076878402	0.022821891	0.036204278	32.98667779
401	am107	SHF	DOLLAR	1	0	1783.54	-0.044905689	0.017738248	-0.000608019	0.015972624	-26.87194047
402	am107	SHP	UMBRELLA	1	0	2317.9167	-0.009134817	0.014288832	-0.038429424	0.000841787	19.33361575
403	am107	SHF	SOAP	1	0	1484.1916	0.060188794	0.068555054	0.027812873	0.012078366	0.505394582
404	am107	SHF	MANURE	1	1	1677.2105	-0.138933406	-0.032012661	-0.002513394	-0.004462225	25.35759247
405	am107	SHP	CRADLE	1	0	2730.5823	-0.01332678	0.212379669	0.013099562	0.028709267	15.05676099
406	am107	SHF	ROSE	1	1	1814.1062	0.077052041	0.001784409	0.011351443	0.010988091	21.39345006
407	am107	SHP	TROPHY	1	0	2360.8675	-0.065586754	0.028542139	-0.000818988	0.031828173	-25.78109392
408	am107	SHF	STAPLER	1	0	2372.1925	0.1538411	0.092743655	0.02813179	0.034700506	33.85639878
409	am107	SHP	BONE	1	0	3663.8746	-0.028229381	0.101694755	0.011682846	0.013348221	17.1011014
410	am107	SHP	ORANGE	1	0	2167.8521	0.175443345	0.098633301	0.036584759	0.051176949	-5.643705602
411	am107	SHF	GLASSES	1	0	2329.1042	-0.126671272	-0.111701812	0.012345926	0.039707494	3.573500882
412	am107	SHF	TIGER	1	0	1781.3997	0.249458784	0.164556777	-0.002149606	0.032376317	3.378951194
413	am107	SHF	MOUSE	1	0	1969.4352	-0.120025966	-0.04613823	0.027285998	0.030203535	-17.28866238
414	am107	SHF	BANANA	1	0	1936.1235	-0.146881894	-0.021799943	0.00784272	0.008919216	29.04258836
415	am107	SHF	GUITAR	1	0	1638.5143	0.084699761	0.193612777	0.037009703	0.054061949	34.51724262
416	am107	SHF	PLATE	1	0	2065.7909	-0.085342748	-0.119842035	0.022274472	0.01617278	-23.84140357
417	am107	SHF	DOLL	1	0	1847.0908	-0.132494125	-0.187879398	0.001274042	0.036717109	-6.0157976
418	am107	SHP	VIOLIN	1	0	2373.4107	-0.054734591	0.009130261	-0.00077138	0.037861793	-17.96130542
419	am107	SHF	BALLOON	1	0	2539.5971	-0.022854552	-0.019352459	0.031598941	0.050867878	-12.21886382
420	am107	SHF	NEST	1	1	1943.2376	-0.088013077	-0.047863608	0.014877114	0.009473959	10.04206532
421	am107	SHP	NET	1	0	2353.6069	0.142034951	-0.066237279	-0.042293791	0.030115322	-9.161518965
422	am107	SHF	TOAST	1	0	2299.5465	0.024211502	0.00760345	0.018547637	0.025527452	2.741821493
423	am107	SHF	OYSTER	1	0	1954.4972	-0.037191198	-0.07897275	0.008127323	0.011028096	5.658142288
424	am107	SHF	SPONGE	1	1	1990.7714	-0.003000903	0.021447381	-0.016971669	-0.004114617	-9.14225106
425	am107	SHP	PAIL	1	0	2357.2004	-0.037686977	-0.041775246	0.068002318	0.019284492	-8.854666695
426	am107	SHF	LOCKER	1	1	3987.7076	0.097625431	0.107119964	0.018012719	0.017604021	7.705155691
427	am107	SHF	BOWL	1	0	2576.0016	0.10898453	0.125606289	0.019170049	0.007352621	0.558033459
428	am107	SHP	CAMERA	1	0	1722.5839	0.092716124	0.004375661	0.017481929	0.021426342	24.52176798
429	am107	IP	SPOON	0	0	2728.5358	0.014728526	0.006594171	0.013930311	0.038575942	3.236104405
430	am107	SMP	BACON	0	0	2503.5887	0.039442389	0.065697111	0.012990074	0.027749259	-36.22980206
431	am107	SMP	SHOWER	0	0	3185.6241	-0.012564836	-0.167481242	0.007899039	0.013599285	1.387934516
432	am107	SMP	DIAMOND	0	0	1510.6806	-0.041965614	-0.060102594	-0.012097357	0.013876565	-7.985556463
433	am107	IF	PILLOW	0	0	2379.9775	-0.216258981	0.062526318	-0.021654814	-0.00432594	-3.211084959
434	am107	IF	LIME	0	0	2399.2188	0.297430276	0.146647056	0.039477216	0.045164851	16.34721704
435	am107	IF	HOSE	0	0	2449.7929	-0.009226012	-0.049246024	0.03252375	0.028662262	0.442401589
436	am107	SMP	BELL	0	0	2183.5541	0.032111698	0.034728241	0.008558165	-0.006016213	-6.185521032
437	am107	IP	KEG	0	0	2464.0646	-0.038543516	0.020746283	0.003669868	0.008744728	4.159738551
438	am107	SMF	PENNY	0	1	2155.047	-0.011859116	-0.024102947	0.061625713	0.063597756	18.80871449
439	am107	MP	SHOVEL	0	0	1358.6191	-0.165303913	0.021649671	0.013123023	0.02636103	-8.872819077
440	am107	IF	COUCH	0	0	2431.3435	-0.020779938	0.003102668	0.037838976	0.025171598	16.87954193
441	am107	SMP	BOOT	0	0	2600.8592	0.136841776	0.071578586	-0.004381024	0.01531985	-12.991475
442	am107	IP	RABBIT	0	0	3031.6873	0.096273054	-0.019437136	0.006842543	0.021152446	-1.021837847
443	am107	IP	BROOM	0	0	2169.6129	-0.026460655	0.073167533	-0.005865586	-0.009259099	27.23281583
444	am107	SMP	CHERRY	0	0	2396.1897	-0.091270911	-0.05859793	0.024944461	0.033837212	-30.28131148
445	am107	SMF	TRAY	0	0	2173.7571	-0.098423999	-0.058428605	-0.042264229	-0.022716307	39.38707542
446	am107	IP	FAN	0	0	2490.505	0.289472615	0.273431773	0.013079265	0.014957287	7.546515588
447	am107	SMF	MILK	0	0	2500.1168	0.193981856	0.191567678	0.028497598	0.045440093	12.58459655
448	am107	SMP	HOOK	0	0	2508.0237	0.055123821	-0.014268612	0.028698715	0.055888039	15.10131934
449	am107	IP	FLASK	0	0	2205.5593	0.005021461	0.122984614	0.008214349	0.038629987	8.762813698
450	am107	IP	STOOL	0	0	2613.4969	0.040552692	0.132776988	0.018117423	0.049829934	-11.59406723
451	am107	SMF	FENCE	0	0	2321.2474	-0.093884965	-0.038976688	0.009099966	0.031483651	12.40869843
452	am107	IP	ELEPHANT	0	0	2052.4597	0.213648654	0.017503016	-0.004198895	0.021800046	0.30685882
453	am107	IP	RAILROAD	0	0	2478.6022	-0.0007341	0.010423821	0.008861614	0.024002654	34.68643147
454	am107	IP	BASKET	0	0	2212.8092	0.076811971	0.028361104	-0.004653217	0.013344807	4.550129336
455	am107	IF	MOTH	0	0	2139.8139	0.075706958	0.174881068	0.048627606	0.04290484	13.52920286
456	am107	SMF	WHIP	0	0	2311.2949	-0.021314945	-0.074036599	-0.012451951	-0.014263433	28.74863829
457	am107	IF	CORN	0	0	1999.6592	0.072757685	0.126525462	0.004645415	0.017324407	10.40098054
458	am107	SMP	PIE	0	0	1809.5109	0.053669405	0.029221998	0.010986508	0.035434667	16.22482588
459	am107	SMF	PARADE	0	0	3220.7653	0.050389533	0.055276379	0.048021574	0.034717905	2.576735173
460	am107	IP	KITTEN	0	0	2623.6749	0.232772679	0.306764217	0.007083581	0.051192995	9.989191739
461	am107	SMF	COFFEE	0	0	2478.2895	0.003042807	0.132085862	0.078650024	0.081816447	-5.863098627
462	am107	SMP	PYTHON	0	0	2137.0069	0.102798978	-0.016034078	0.01297067	0.023629168	9.039459998
463	am107	IF	FLAG	0	0	1778.2455	0.204208744	0.170034984	0.020391155	0.024551001	-7.717936634
464	am107	MF	PAINTBRUSH	0	0	2375.9684	0.010733367	-0.022128532	0.036426398	0.018664173	-28.64794754
465	am107	SMP	APPLE	0	0	2809.3412	0.257904243	0.215734182	0.00826336	0.032240258	22.92873809
466	am107	SMP	CAKE	0	0	2047.7283	-0.039777258	-0.124577779	0.010793535	0.014519541	-22.44636227
467	am107	SMP	TOILET	0	0	2906.5332	0.144648579	0.112085973	0.02621162	0.034664439	22.11855864
468	am107	MF	DESK	0	0	2688.784	0.132847302	0.046332852	0.069630653	0.039585594	10.36966763
469	am107	MP	STRING	0	0	2944.1342	-0.183219367	0.051383237	0.011521402	0.021276925	-8.089141162
470	am107	SMP	CIGAR	0	1	2096.1228	0.048387352	-0.020411815	0.010354806	0.024775392	16.3072123
471	am107	SMP	SEAL	0	0	2377.082	0.155062303	0.045864214	0.017840201	0.042775912	-7.137181594
472	am107	IP	KETTLE	0	0	2670.122	0.15657924	0.17906164	0.015186142	0.026209304	24.0295034
473	am107	IP	NEEDLE	0	0	2298.5711	-0.108019046	0.049024711	0.021639048	0.037970312	3.750352721
474	am107	IF	BENCH	0	0	2940.9266	-0.087456821	-0.025476733	0.033643832	0.057384881	-6.3214508
475	am107	MF	HAM	0	0	2937.6684	0.140156637	0.074818589	0.012767351	0.030890817	3.951119075
476	am107	SMP	LAMP	0	0	2330.5435	-0.167634345	-0.076360127	0.001605352	0.007471211	41.746185
477	am107	IF	SOCK	0	0	1637.4401	0.093065059	-0.159141355	0.012626017	0.032688678	1.221104383
478	am107	SMF	OVEN	0	0	2842.5284	-0.059150739	-0.110661666	-0.024630726	0.01283435	10.41565374
479	am107	IF	PIANO	0	0	2072.6546	0.08298781	0.085960805	-0.058374709	-0.017402826	4.904563451
480	am107	IP	SHEEP	0	0	2243.264	0.217910423	0.098902813	0.004439105	0.015801007	-6.68131778
481	am107	SMP	LION	0	0	2127.3563	0.079410989	0.044317861	0.019758842	0.038622622	-13.88759023
482	am107	SMF	OMELET	0	0	2578.5743	0.041589373	-0.033614687	0.045099063	0.021604383	11.69392699
483	am109	SHP	CLOCK	1	0	2471.0231	0.210989964	0.215212008	0.017576768	0.029436481	11.72684909
484	am109	SHF	BACON	1	1	1284.5888	-0.011846463	0.050181308	0.012055529	0.008090777	15.11137651
485	am109	SHF	HOOK	1	1	3105.0527	0.275936099	-0.02691545	0.022210342	0.029384329	14.44515559
486	am109	SHP	WHIP	1	0	3113.2848	0.169792857	-0.008716547	0.027665909	-0.008463958	6.396184188
487	am109	SHF	LIME	1	1	1587.2631	-0.058920266	0.036458189	0.006952091	0.020778769	6.345861907
488	am109	SHP	RAILROAD	1	0	3396.8346	-0.010763991	0.05365277	0.089011276	0.000668288	8.132648361
489	am109	SHF	MUSTARD	1	0	2626.9361	-0.067950775	0.085873397	0.017522191	0.017036245	9.557683954
490	am109	SHF	SOUP	1	0	1702.1887	-0.013597438	0.003423447	-0.001753586	0.009141376	38.58663356
491	am109	SHF	MONKEY	1	0	3329.1201	-0.103780293	0.076426685	0.010259253	0.023795921	6.625836823
492	am109	SHF	SOAP	1	1	2143.0831	0.034465351	0.050228844	-0.001243239	0.004136451	4.68315466
493	am109	SHF	LION	1	0	2675.0947	-0.053941671	-0.086887086	0.018194057	0.018854089	7.225157705
494	am109	SHP	TRUMPET	1	0	2952.4086	-0.148858496	-0.045087093	0.028684242	-0.003525433	6.705240129
495	am109	SHF	CIGAR	1	1	1449.0664	-0.079298441	-0.074867191	-0.007712173	0.024775741	14.56082974
496	am109	SHP	HIGHWAY	1	0	3331.2911	-0.155819056	-0.023602416	0.068833747	0.038305567	3.493895603
497	am109	SHP	ELEPHANT	1	0	3060.1886	0.018826489	0.098656959	-0.0184006	0.019949982	-12.64281856
498	am109	SHF	PENCIL	1	1	2818.6518	-0.203169505	-0.137032104	0.027340213	0.010561998	19.56975833
499	am109	SHP	FENCE	1	0	3548.4208	0.040487483	0.192039818	0.038636752	0.012927711	-7.73431139
500	am109	SHF	JELLY	1	0	1453.189	-0.047804947	-0.172624805	-0.001972599	-0.00417002	13.74311976
501	am109	SHF	WOLF	1	1	1595.3886	0.113935289	-0.057667269	0.000651303	-0.003103205	-2.309271208
502	am109	SHP	KITTEN	1	1	2100.6873	-0.032543754	-0.129071172	0.001829056	0.013767688	27.33685477
503	am109	SHP	BOWL	1	1	3617.1225	0.269100318	0.1800838	0.042842553	0.026259974	-16.77051049
504	am109	SHF	UMBRELLA	1	0	1430.2495	0.203318763	0.01140692	0.003681044	0.024296651	30.27873991
505	am109	SHF	GOAT	1	0	2391.009	0.060611878	0.010411222	-0.006730239	0.001768929	29.37349172
506	am109	SHF	TAXI	1	1	1965.0312	-0.204642304	-0.097719473	0.022449176	0.027099882	-16.7445782
507	am109	SHP	WINE	1	1	2315.3801	-0.159412974	-0.00870324	0.082951341	0.026780294	20.32087835
508	am109	SHF	STAPLER	1	0	1824.4824	-0.026045735	-0.001178313	0.00128143	0.023920581	9.211413779
509	am109	SHF	LADDER	1	0	2630.4353	-0.058079521	-0.063829761	0.017878353	0.00397925	8.424533654
510	am109	SHF	CASTLE	1	1	1913.9324	0.145680845	0.022799053	0.026783753	0.017554954	14.71032704
511	am109	SHP	PILLOW	1	0	1886.8127	0.059678025	0.079477545	-0.006126851	-0.001925372	4.251490714
512	am109	SHF	RABBIT	1	0	1493.281	-0.224604406	-0.091284906	0.007713707	0.014157942	36.06948896
513	am109	SHP	BALLOON	1	0	2602.8223	0.329242694	0.194655149	0.079805635	0.012575294	-3.842577869
514	am109	SHF	PARADE	1	0	2516.1133	-0.095704838	-0.026476755	0.027662721	0.014988705	11.8626952
515	am109	SHF	BASKET	1	0	2015.3636	-0.046335887	-0.085518908	-0.001941804	0.001610491	17.46209028
516	am109	SHF	MITTEN	1	0	2173.5578	0.215440631	0.073444782	0.003903039	0.00367272	35.29819863
517	am109	SHF	CHERRY	1	1	2397.4657	0.022246693	-0.03225704	-0.010619121	0.011512288	-5.515838022
518	am109	SHF	COUCH	1	1	1589.1733	0.04275818	0.074875784	0.008254241	0.014560457	10.10835198
519	am109	SHP	OMELET	1	1	2603.1349	0.068009647	0.139292959	0.018898718	0.02344584	26.14016527
520	am109	SHP	LIZARD	1	0	1967.9452	0.051796234	-0.078380028	-0.053895051	-0.014525331	21.49419926
521	am109	SHF	MOON	1	0	2745.7459	-0.036220957	-0.088571405	0.000678384	0.014420236	13.97267309
522	am109	SHF	ORANGE	1	0	2227.8239	-0.171572376	-0.112537369	0.001470495	0.000713437	-5.997837907
523	am109	SHF	MANURE	1	0	1941.5043	0.162554155	0.196988299	-0.007741933	0.00246644	-19.53876427
524	am109	SHP	SCISSORS	1	0	3983.6667	0.03550967	0.065002683	0.047121588	0.020068234	5.130610854
525	am109	SHF	SHOVEL	1	0	2716.504	-0.063231241	0.012806328	-0.00277737	-0.000980688	8.665171725
526	am109	SHF	MUFFIN	1	0	1637.9825	-0.157979457	0.082941207	0.018260361	0.006934842	33.12030602
527	am109	SHP	SHEEP	1	0	2185.0688	0.259655022	0.130892861	0.078043503	0.030501157	17.61563117
528	am109	SHP	TURTLE	1	1	1692.6641	0.014589378	-0.005660209	0.055939874	0.018237334	11.40653571
529	am109	SHP	HOSE	1	1	1928.9464	-0.128021934	-0.087386354	0.050363669	0.01617761	7.209459457
530	am109	SHF	GUITAR	1	0	2556.1496	-0.093509356	-0.09873108	0.017763387	0.017392075	-9.437167079
531	am109	SHP	CAMERA	1	1	3057.2092	0.091987144	0.143306723	0.025135618	0.016142255	19.14112462
532	am109	SHF	BIBLE	1	0	2035.1404	0.073064775	0.049237882	-0.005463733	0.002444019	12.88117363
533	am109	SHF	NAPKIN	1	1	1982.5201	-0.158969245	-0.044271925	0.033146609	0.005901785	29.31204081
534	am109	SHF	SYRUP	1	0	1630.7072	-0.26211416	0.001620025	0.011797324	-0.001150565	21.58147497
535	am109	SHF	HONEY	1	0	1673.8577	0.002595602	0.047716846	-0.016278226	-0.014887095	-6.549833055
536	am109	SHP	DRUM	1	1	3250.8815	-0.015220657	-0.038187832	0.05834536	0.014511615	6.001314612
537	am109	SHF	PYTHON	1	0	1400.9	0.240491355	0.09087173	0.01363573	-0.009050842	-14.51776247
538	am109	SHF	CORN	1	0	2264.8465	-0.135908191	-0.117514324	0.027394906	0.00727515	24.43279546
539	am109	SHP	QUILT	1	0	2164.2213	-0.155203571	-0.049666982	0.060788529	0.037054108	3.930112031
540	am109	SHF	APPLE	1	1	1198.6466	0.010769932	-0.093831816	0.026630866	0.01334168	4.27101765
541	am109	SHF	POTATO	1	0	1734.2974	0.194009974	0.016014466	0.000219704	0.003932912	-15.16118787
542	am109	SHF	SWORD	1	0	1481.2982	0.086567685	0.022917481	0.010214775	0.030998906	-8.191161378
543	am109	SHP	PIGEON	1	0	2900.0278	0.351785614	0.233637546	0.001650027	0.012457411	-18.56869061
544	am109	SMP	TRAY	0	0	4131.5663	0.04209966	-0.041849649	0.01423597	0.021645644	-12.94316347
545	am109	IP	STOOL	0	0	2030.9254	-0.020419077	0.099088452	-0.042693799	0.009108403	-10.81770117
546	am109	MF	COFFEE	0	0	3081.3236	0.288699889	-0.083823093	0.008114073	-0.01349542	-9.237969359
547	am109	MP	HAM	0	0	4722.226	-0.148287426	0.087171057	0.005352734	-0.018554828	-0.599227102
548	am109	MP	DOLL	0	0	3868.3243	-0.053764927	0.076977043	-0.015050909	0.003105839	-7.543360317
549	am109	MF	DOLLAR	0	0	2274.6398	-0.036780966	0.035752905	-0.056341994	-0.002724069	-10.67496375
550	am109	MF	PHONE	0	0	3303.8852	-0.118878936	0.00577818	-0.087231369	-0.030722599	7.268890984
551	am109	MF	STAR	0	0	3321.6127	-0.079716378	-0.073019021	0.040372695	0.02765005	-12.51675307
552	am109	SMP	PAIL	0	0	2132.9774	-0.124596398	0.045273391	-0.026266936	-0.011362649	5.105512061
553	am109	SMP	TOWEL	0	0	2641.3693	0.045343584	-0.009318202	0.039226911	0.026132503	3.161250252
554	am109	SMP	SOCK	0	0	2061.6523	0.053694293	-0.036038685	0.051044893	0.045515908	6.120532817
555	am109	SMP	JACKET	0	0	1745.7504	0.127306276	0.224871923	0.007075135	0.030630117	-13.53212673
556	am109	SMP	CROWN	0	0	4036.8552	-0.127171451	-0.072096777	0.02348214	0.016810578	26.05942184
557	am109	SMP	TIRE	0	0	2730.7439	0.009524947	-0.122517957	0.031904079	0.039345845	-19.78183915
558	am109	MP	TROPHY	0	0	2750.4919	-0.268527379	-0.152269197	0.011708132	-0.001014401	-6.632708033
559	am109	SMP	BONE	0	0	3195.4376	0.195743269	0.015492154	0.012984319	0.010003779	-26.27148883
560	am109	MF	WALLET	0	0	1768.561	0.168049452	0.070173605	0.029863538	0.056200735	-14.50448697
561	am109	MF	HAMMER	0	0	2160.2757	0.105224876	0.037072093	0.016103173	0.026586019	-17.90486684
562	am109	MP	SPOON	0	0	3048.3822	-0.052647811	0.03345513	0.011644566	-0.004224888	20.62210839
563	am109	SMF	ROCKET	0	0	3091.4144	0.23944008	0.225882244	-0.014783232	0.037319313	-26.98892699
564	am109	MP	ANCHOR	0	0	3487.2161	0.044025649	0.016477324	0.024777235	0.008089405	-3.247866547
565	am109	MP	MAGNET	0	0	3183.9857	0.060608001	0.014760477	0.03673094	0.003528141	7.823970413
566	am109	IF	LAMP	0	0	4438.4514	0.094481194	0.061376016	0.033480833	0.049263644	-5.402188645
567	am109	SMP	STRING	0	0	2012.6399	0.105630256	0.00012508	0.009667099	0.028816326	0.973076993
568	am109	MF	KETTLE	0	0	2357.6119	-0.182747427	-0.031853407	0.042038359	0.023527166	5.566783197
569	am109	MF	BELL	0	0	2429.9612	-0.237310905	-0.186989614	-0.043884313	-0.033737223	21.13086115
570	am109	SMP	MOUSE	0	0	2337.0768	-0.212071124	-0.168336587	0.000380715	0.00451682	-3.750858393
571	am109	IP	BRAIN	0	0	2729.9725	0.445480633	0.039639674	0.049342725	0.0599924	-11.12680042
572	am109	MF	SPONGE	0	0	2664.6774	-0.15278179	-0.023145488	0.086662081	0.085594678	-1.727084184
573	am109	MP	MAP	0	0	2200.6129	-0.230406318	-0.12351009	0.037705622	0.036802146	14.12817084
574	am109	MF	PENNY	0	1	2244.9686	0.023927615	-0.045054761	-0.051829327	-0.031304698	30.37970475
575	am109	SMP	ARROW	0	1	2417.869	-0.005378602	0.018564402	-0.027566691	-0.048136956	-9.171818679
576	am109	SMP	GLASSES	0	0	3273.1257	-0.206361926	-0.126869083	0.037164722	0.013195968	-46.65443007
577	am110	SHF	RAILROAD	1	1	2134.9365	0.035731052	0.052932603	0.087432983	0.019128856	10.30763192
578	am110	SHP	MUFFIN	1	1	1831.3916	0.010816305	0.117909616	0.043348429	0.010424943	6.978432059
579	am110	SHF	OTTER	1	1	1707.6195	-0.031436938	0.015458592	-0.072144664	0.009295036	-5.761822206
580	am110	SHP	HONEY	1	1	2305.3262	0.054166352	0.013497123	0.047318749	0.011843388	12.41242503
581	am110	SHF	BANANA	1	1	1936.7642	0.102480526	0.072596082	0.066921869	0.020048016	-5.054806456
582	am110	SHP	UMBRELLA	1	1	3824.1618	0.053117768	-0.037322868	0.061989603	0.025902387	-5.968744458
583	am110	SHF	MOUSE	1	1	2325.3539	0.079282858	-0.038488618	0.038258969	-0.009665072	30.79800523
584	am110	SHP	CAMERA	1	1	3137.414	-0.076416598	-0.057627779	0.026437967	0.033092826	-5.11213128
585	am110	SHF	PENNY	1	1	2048.4677	-0.077998924	0.08131885	0.039644582	0.015023205	8.320317454
586	am110	SHF	LIME	1	1	3009.7959	-0.009081493	0.04279652	0.017052762	0.022224042	2.690388971
587	am110	SHP	FLASK	1	1	4299.331	0.121533	-0.042894547	0.050948517	0.024440426	-0.541551096
588	am110	SHF	STAPLER	1	0	2400.2503	0.133290031	0.071857318	0.067459058	0.044083276	14.34476777
589	am110	SHF	DUCK	1	1	1691.1328	0.060512313	0.042223198	0.09392118	0.01095613	0.85269245
590	am110	SHF	LION	1	1	3276.0029	0.082885283	0.173752515	-0.012805436	0.006730015	-2.96127697
591	am110	SHF	TRAY	1	0	2814.0513	0.112276821	0.117113294	-0.058240698	-0.030502911	-1.266337449
592	am110	SHF	PENCIL	1	1	2102.8592	0.122952412	-0.104728632	0.032783217	-0.013874276	9.619740175
593	am110	SHF	PYTHON	1	1	2901.2943	0.055365554	0.059353354	0.007620801	-0.032508625	1.1078307
594	am110	SHF	NAPKIN	1	1	1847.7413	-0.016838039	-0.093631794	0.042705093	0.01213148	14.70854229
595	am110	SHF	HAM	1	0	2852.7499	-0.117959281	0.000672126	-0.035756054	0.000488585	8.15994936
596	am110	SHF	NEEDLE	1	1	2677.2127	0.032480469	0.158133476	0.013352234	-0.018679592	4.603297113
597	am110	SHF	SYRUP	1	1	1085.7733	0.155838333	0.007251356	0.043950056	-0.01315982	16.43430349
598	am110	SHF	CAPE	1	1	1697.203	0.185309721	0.090575527	0.088614792	-0.009916283	4.47224987
599	am110	SHF	PIGEON	1	0	1894.2669	-0.028313591	0.064959631	-0.051932098	0.038670189	13.56990261
600	am110	SHF	SPONGE	1	1	1078.3528	0.011033305	-0.085448629	-0.008049581	0.022241828	3.845688054
601	am110	SHF	CASTLE	1	1	3078.0329	0.010343945	-0.061169463	0.061433839	0.031875369	13.69540863
602	am110	SHP	BACON	1	1	2940.6389	0.303708451	0.049476705	0.079623255	-0.016636576	8.490302302
603	am110	IF	CANOE	0	0	2719.8121	-0.025107664	-0.004009189	0.005075532	0.007466983	-3.097712886
604	am110	MP	POTATO	0	0	2150.7535	0.03888137	0.063839722	0.023315415	-7.20E-05	-0.325445987
605	am110	IF	TRACTOR	0	0	2103.2634	-0.039443137	0.058875441	-0.007043825	0.002853422	-0.701449597
606	am110	MP	SOAP	0	0	2475.8848	-0.037053876	0.034309718	0.015301138	0.006388755	-8.028979889
607	am110	IP	BELL	0	1	2019.042	0.045103624	0.005053999	-0.002688448	-0.002422679	12.25137441
608	am110	MF	MILK	0	0	1338.4314	0.008004377	-0.03758935	0.00062729	0.006362255	-5.284460046
609	am110	MP	JACKET	0	0	1394.3341	-0.042543592	0.06303608	0.024219558	0.01204977	8.87525625
610	am110	IP	ARROW	0	1	2894.1938	0.073250891	-0.035964852	0.014881721	0.001540133	-12.91724358
611	am110	SMP	CARROT	0	0	2292.3838	0.029224708	0.026398984	0.001016983	0.004287621	-1.848211976
612	am110	IF	BRAIN	0	0	2364.8585	0.064547634	0.075162546	-0.021028023	0.008648151	-8.442877699
613	am110	MF	PIANO	0	0	2213.0284	0.044891403	0.018237777	-0.001795592	0.013358827	0.148215363
614	am110	IF	SHEEP	0	0	2655.0191	-0.002523522	0.007821483	0.018600038	0.005979279	4.063294783
615	am110	IF	PARADE	0	1	2309.0538	0.099615071	-0.133522656	-0.021535932	0.019186978	9.819823621
616	am110	MF	MUSTARD	0	0	2469.8074	-0.02642503	-0.151060439	-0.004526202	0.00952127	-12.29725637
617	am110	IF	DOLL	0	0	2760.5751	0.025750015	-0.006521143	-0.006764701	0.00108689	-4.864306002
618	am110	IF	CORN	0	0	3267.4016	0.033786384	0.014967964	-0.000740869	0.003740795	14.21946622
619	am110	MP	DIAMOND	0	0	1602.0876	0.004065649	-0.027219924	0.020688998	0.011125551	1.675466904
620	am110	SMP	WOLF	0	0	2477.2675	-0.004266466	0.066687517	0.021395289	0.005342387	0.937769604
621	am110	IF	SHOWER	0	0	2767.6293	0.0625133	0.08676343	0.028366444	0.00027974	1.068581658
622	am110	IF	MAP	0	0	2084.6605	0.062989547	-0.006608487	0.027760167	-0.001774566	-8.577954184
623	am110	MP	BOOT	0	0	1652.068	-0.001899227	-0.143343608	0.030660798	0.022535182	7.751553631
624	am110	IF	DESK	0	1	2392.2999	0.038800528	-0.020166091	-0.009622995	0.00022538	14.48911106
625	am110	MP	WINE	0	0	2524.3052	0.011545359	-0.066776587	0.012632182	0.02063552	-13.86090028
626	am110	IP	LOCKER	0	0	2427.7904	-0.138032482	-0.110274602	0.017523864	-0.00213458	1.097574994
627	am110	IF	FLAG	0	0	2413.0599	0.021551253	0.022271941	0.006193533	-0.003591406	5.0789192
628	am110	IP	LAMP	0	0	2417.8458	0.074990198	0.04014475	0.007179105	0.014713349	-2.834933345
629	am113	SHP	CANOE	1	0	2712.002	0.28308799	0.115046941	0.030990652	0.064522082	8.037031268
630	am113	SHF	QUILT	1	0	1901.9375	-0.172577417	-0.022303804	-0.002139095	0.010698968	-12.92557505
631	am113	SHF	APPLE	1	0	2482.1503	0.05198197	0.057185895	0.019519461	0.026081158	-4.188800565
632	am113	SHF	HONEY	1	0	1562.3246	-0.062458223	0.044545322	0.02041322	0.023847835	0.851673064
633	am113	SHP	NEEDLE	1	0	1631.3874	0.129985088	0.055617574	-0.000272597	0.023165486	9.060707764
634	am113	SHF	CAKE	1	0	2614.0914	-0.135682132	0.089705133	0.02051975	0.020591155	-6.188392503
635	am113	SHP	LADDER	1	0	1990.1754	0.200041384	0.080362159	0.055395045	0.032381072	9.925688504
636	am113	SHF	LIZARD	1	1	1738.0595	0.068135742	-0.035673032	0.008199384	0.011547575	1.424949961
637	am113	SHF	ROSE	1	1	1863.4445	0.136472948	0.002709961	0.024668475	0.018545304	19.22221567
638	am113	SHP	SOUP	1	1	1786.5828	0.072074291	0.05072261	0.035153299	0.024363051	8.021736691
639	am113	SHF	DOLLAR	1	1	1718.3907	0.088705683	0.025506701	0.039238665	0.031093848	-18.28238885
640	am113	SHP	MONKEY	1	0	2290.4787	-0.02195659	0.011045129	-0.011166578	0.033383597	-1.225806809
641	am113	SHF	STAPLER	1	0	2947.2411	0.177016521	-0.015474906	-0.008727617	0.015852745	2.083087131
642	am113	SHP	NEST	1	1	1261.2239	0.002084558	0.000935715	0.027600033	0.049470669	15.22477484
643	am113	SHF	UMBRELLA	1	1	1766.5848	0.146175277	0.060684851	0.053643429	0.039697149	29.76014523
644	am113	SHF	BADGE	1	1	2472.7508	0.115092498	0.079031155	0.022886868	0.029498704	22.31071998
645	am113	SHP	SWORD	1	0	2165.7011	-0.199844521	-0.013161264	0.043675262	0.014187434	16.2926159
646	am113	SHF	BRAIN	1	0	2062.0333	-0.046306223	-0.015820673	0.002144499	0.001922666	-6.133403456
647	am113	SHP	MOUSE	1	1	1483.1515	-0.035082334	-0.010367014	0.006052703	0.028082393	13.0924744
648	am113	SHF	FAN	1	0	3193.6166	0.133570967	0.069129405	0.00167835	0.012039073	-0.86740361
649	am113	SHF	MAGNET	1	1	2444.9444	-0.043798283	-0.04870565	0.007991134	0.003780929	6.561827798
650	am113	SHP	SOCK	1	0	3223.2142	-0.078339185	0.019873688	0.021673801	0.027841749	10.17955064
651	am113	SHP	MUG	1	1	1598.9832	0.112916695	-0.006881444	-0.015850866	0.002926133	9.779789394
652	am113	SHP	SPONGE	1	1	3093.0197	0.054357405	-0.046266465	0.018053658	0.041336667	-5.069047539
653	am113	SHF	NET	1	0	2150.061	0.030332312	0.019760064	0.012827426	0.03220345	2.333371907
654	am113	SHF	MOON	1	0	1889.9033	-0.001147114	0.058856866	0.034350171	0.029670612	-6.936741442
655	am113	SHF	DRUM	1	0	3327.271	0.069822733	0.000334163	0.074686188	0.037900692	-0.207772219
656	am113	SHP	MANURE	1	0	1707.7105	-0.040083232	0.004481974	-9.34E-05	0.026828385	1.21746705
657	am113	SHP	HAM	1	1	2243.4426	0.165315783	0.02318731	0.056411476	0.023231311	11.26295526
658	am113	SHF	MUFFIN	1	0	2524.0489	-0.004310404	0.02297091	-0.017937771	0.038371143	0.666622198
659	am113	SHP	ARROW	1	0	2156.8689	0.021555749	0.093055326	0.027116787	0.041082756	10.38324717
660	am113	SHF	BELL	1	1	1478.9878	-0.070397412	-0.022383102	0.057758501	0.021973521	-10.04593348
661	am113	SHP	GOAT	1	0	1893.8912	0.043125041	0.040279706	0.051974926	0.039079768	8.117682793
662	am113	SHP	MOTH	1	1	1650.572	0.084712599	0.074927433	0.022601423	0.042102063	19.50479682
663	am113	SHP	CAGE	1	1	2961.6957	0.013275287	0.013622072	0.046221002	0.038737269	15.85445772
664	am113	SHP	DOLL	1	0	2931.5399	0.026090231	0.04055204	0.017398333	0.018702749	-6.914325673
665	am113	SHP	BROOM	1	0	2556.3384	0.030085481	0.057590442	0.039407304	0.051943377	13.03795445
666	am113	SHP	STOOL	1	1	2246.4066	-0.128629377	-0.004608192	0.023667343	0.024509287	15.00950436
667	am113	SHP	KEG	1	1	1904.0057	0.242413229	0.043189952	0.036346112	0.053440535	41.30107933
668	am113	SHF	CEREAL	1	1	1278.9639	0.069269292	0.067866999	0.026320871	0.034224879	13.89319084
669	am113	SHP	FLASK	1	1	3160.5927	0.086824329	0.12077543	-0.002691559	0.01709915	2.215342918
670	am113	SHF	MUSTARD	1	1	1812.1385	0.057000094	0.048811542	0.004827001	0.042243396	5.035106353
671	am113	SHP	PILLOW	1	1	1458.0209	0.03703486	0.093888042	0.004400894	0.053283539	8.971185066
672	am113	SHF	PAINTBRUSH	1	1	1755.15	0.076361832	0.147190514	0.037498369	0.038099504	7.182298022
673	am113	SHP	BACON	1	1	1706.2749	0.038675065	0.108407989	-0.013355493	0.021735431	-3.114219059
674	am113	SHF	SYRUP	1	1	1382.1506	0.066082669	0.024277595	0.0275386	0.017292369	17.42756992
675	am113	SHF	GLASSES	1	1	2100.7771	0.061117518	0.006216325	0.055231648	0.025197723	19.63173768
676	am113	SHP	LION	1	0	2563.2306	0.219066873	0.121885471	0.051892571	0.06056418	5.932988845
677	am113	SHF	TOILET	1	0	1196.2131	0.130139892	0.070148106	0.051540176	0.034193862	-3.566596577
678	am113	SHP	COUCH	1	1	3238.7923	-0.03356457	0.08791664	0.001020981	0.048867172	-12.75386258
679	am113	SHP	WOLF	1	0	2168.2682	0.036941594	0.066573213	0.07843375	0.076096816	7.71041683
680	am113	SHP	DEER	1	0	2535.4439	0.035082573	-0.028879346	0.030445643	0.058564979	-3.563779559
681	am113	SHP	SHEEP	1	1	2629.0613	0.0474601	0.064462833	0.103913989	0.082035585	-5.630248627
682	am113	SHF	TOAST	1	0	2710.8585	0.034087008	0.071569866	0.037946826	0.04744682	4.88461443
683	am113	SHF	HOOK	1	1	2776.1113	0.215512426	0.084730838	0.039345695	0.026321491	19.67911287
684	am113	SHP	ROPE	1	1	2392.5585	0.02151235	0.05399185	-0.026414108	0.047535358	-0.35480103
685	am113	SHF	TURTLE	1	0	1871.7839	-0.056325376	0.010964253	-0.004108111	0.025541299	28.5787244
686	am113	SHF	STAR	1	1	1071.2703	0.095323476	0.013643408	0.078198694	0.015613619	-4.010709184
687	am113	SHP	PLATE	1	0	2373.2342	0.096159202	0.067110396	0.01878733	0.019816104	7.939325559
688	am113	SHP	COFFEE	1	1	1552.7245	-0.194082837	-0.180907529	0.120929578	0.048116852	10.4639597
689	am113	SHF	ELEPHANT	1	1	1575.2815	0.032970596	0.028089968	0.055768532	0.022354937	-4.856760777
690	am113	SHF	DIAMOND	1	1	1355.3443	0.132734322	0.034055185	0.04328392	0.02246691	11.21288187
691	am113	SHF	JELLY	1	1	2807.0423	-0.186078725	-0.020918095	-0.031927627	0.025745844	16.61009044
692	am113	SHF	CAMERA	1	0	1543.4286	0.051892277	0.044364707	0.029133056	0.007844107	-9.517068659
693	am113	SHF	BANANA	1	0	3300.6447	0.009778953	0.060551473	0.050102694	0.00054256	-14.13980955
694	am113	SHP	PIE	1	1	1845.3856	-0.036863206	0.001401305	-0.044454309	0.01746479	10.91404774
695	am113	SHP	SHOWER	1	1	3203.5077	0.111921256	0.071467043	-0.051532636	0.025406536	-2.952251354
696	am113	SHF	CORN	1	1	1491.4562	0.162773997	0.064661212	0.027679781	0.020338759	17.09732578
697	am113	SHP	ORANGE	1	0	3337.8844	0.006388634	0.044271342	0.002282864	0.039308231	-4.657067734
698	am113	SHF	WINE	1	1	1125.5479	0.215349846	0.182263957	0.055421682	0.021901107	8.399999749
699	am113	SHP	LIME	1	1	2389.9531	0.028761722	0.083423114	0.021854785	0.04904434	24.3812626
700	am113	SHP	TRACTOR	1	0	2292.8587	0.152803053	0.083929484	0.039384971	0.036080771	6.874328399
701	am113	SHF	OVEN	1	1	1397.742	0.000379141	0.118400726	0.006285349	0.012856335	-14.32715729
702	am113	SHP	DUCK	1	0	2489.19	-0.085182694	0.030880706	0.012134677	0.030329717	20.55418107
703	am113	SHF	RABBIT	1	1	2777.5649	0.144436925	0.126162691	0.00273043	0.006565129	9.557130549
704	am113	SHF	FLAG	1	1	1674.784	-0.091183829	-0.014244496	0.015336126	0.016962234	17.10680389
705	am113	SHF	TAXI	1	1	1305.5245	0.006261445	0.003965039	0.034349292	0.029701616	8.098374223
706	am113	SHP	BARREL	1	0	3096.0767	0.142111915	0.00655649	0.027211252	0.034442084	1.668301803
707	am113	SHF	DESK	1	1	1364.4473	0.136096356	0.079887572	-0.005400699	0.019413859	11.70102455
708	am113	SHF	MILK	1	0	3220.1116	0.065048361	0.012533863	0.032339401	0.026702892	-12.1967539
709	am113	SHF	PIGEON	1	0	1659.6035	-0.029349827	0.059255456	-0.0283399	0.005484296	-1.701401224
710	am113	SHP	HAMMER	1	0	3296.4838	0.060754425	-0.067696908	0.019488992	0.020439976	21.71530562
711	am113	SHP	ENVELOPE	1	1	2914.3952	0.173402094	0.07384781	0.028496582	0.053966922	29.62156641
712	am113	SHF	JACKET	1	0	3319.4912	-0.014147407	-0.01109859	0.007121121	0.019625948	-4.509331538
713	am113	MF	CRADLE	0	0	2510.1084	0.051593005	0.00714032	-0.038383035	0.012702619	-4.516312095
714	am113	SMP	BENCH	0	0	2592.2512	-0.039199856	0.056522213	-0.029479378	0.006708792	11.95464641
715	am113	IF	FENCE	0	0	2889.9878	-0.06050408	-0.068954004	0.044079186	0.033332537	3.341743159
716	am113	MP	TIRE	0	1	2837.187	-0.012727175	-0.048900841	0.033412348	0.052976271	-3.918639549
717	am113	MF	SCISSORS	0	0	2118.7123	0.134502589	0.059692002	-0.006856023	0.012785628	-2.342855543
718	am113	MP	BASKET	0	0	3335.9658	0.220673604	0.001529962	0.002404647	0.041592431	20.52911299
719	am113	SMP	BUTTER	0	0	2938.8186	-0.036148585	0.072875641	0.014983087	0.045464861	14.93421347
720	am113	SMF	CASTLE	0	0	3034.1847	0.044795642	0.066489214	-0.013841201	0.004306259	9.751340241
721	am113	MP	PURSE	0	0	2834.427	-0.041171393	0.010371685	-0.029609435	0.000901679	-7.192660058
722	am113	MP	KETTLE	0	0	2581.2589	-0.01676348	0.06346707	0.002420961	0.032918249	-4.940384977
723	am113	MF	CLOCK	0	0	3594.103	0.019911588	-0.032901431	-0.068423586	0.001575551	8.569679771
724	am113	MF	NAPKIN	0	1	3100.7878	-0.033543271	0.025108316	-0.023958772	0.040858821	-8.302234693
725	am113	IF	LOCKER	0	0	2651.7588	-0.004593865	0.026683276	0.003890698	0.017317188	-1.474256052
726	am113	MF	PYTHON	0	0	3109.0739	-0.047885389	0.035169486	0.01126414	0.013163828	3.038764463
727	am113	IF	CHEESE	0	1	3097.5739	-0.047852739	0.006643682	0.017186362	0.045325693	-16.14932965
728	am113	SMF	STRING	0	0	4189.0177	-0.023726763	0.079560809	0.039635425	0.052983187	-10.65609826
729	am113	SMP	PAN	0	0	3295.043	-0.067002433	0.076742578	-0.04527724	0.041253463	9.792162458
730	am113	SMP	WALLET	0	1	3238.5924	0.07385791	0.013199593	-0.038489565	0.013511223	-0.494386445
731	am113	IF	LAMP	0	0	3114.701	-0.04001622	-0.006451906	0.027826578	0.02094525	-0.122486927
732	am113	SMP	CROWN	0	0	3368.7845	-0.022622461	0.083112302	0.01711911	0.035666747	8.81883232
733	am113	IP	PAIL	0	0	3261.9429	-0.018260739	0.061601362	0.015665129	0.056377999	-2.932217492
734	am113	SMP	TIGER	0	0	3337.6553	-0.068121987	-0.019758231	0.024387655	0.022586592	17.98930475
735	am113	MF	TRUMPET	0	0	3327.4129	0.019839912	0.014976657	-0.038134713	-0.014089312	-5.941199646
736	am113	MP	TOWEL	0	0	3173.7401	-0.06092507	-0.003315348	0.001480221	0.028783116	2.926771304
737	am113	SMP	SPOON	0	0	1430.3343	0.113903098	0.097982058	0.021845998	0.061530248	-18.69643751
738	am113	MF	SHOVEL	0	1	3358.4646	-0.01424693	0.040443013	-9.70E-05	0.031868627	-16.89362298
739	am113	MF	CHERRY	0	0	3352.0326	-0.094998298	-0.090249524	-0.022433656	0.019458088	-1.045797136
740	am113	SMP	OMELET	0	0	3370.9542	0.10940868	0.071866216	0.024227494	0.02621167	4.582319151
741	am113	IP	BOOT	0	0	2516.9074	0.025724264	-0.004999249	0.044721375	0.028602581	-13.65450858
742	am113	MP	ANCHOR	0	0	1486.4953	0.03811902	0.000809062	0.008414248	0.013479375	-5.800019009
743	am114	SHF	CASTLE	1	0	2179.3949	0.004340022	0.084850435	0.019463446	0.059764743	-0.199563402
744	am114	SHP	DOLLAR	1	1	3247.6196	-0.017074823	0.063726985	0.119387156	0.072829492	11.77046248
745	am114	SHF	TRUMPET	1	0	2079.4417	0.199752199	0.257874127	0.021348186	0.045898688	-22.07849904
746	am114	SHF	PLATE	1	0	3307.8633	-0.007887213	0.097650782	0.01051114	0.026913116	-1.806121017
747	am114	SHP	LOCKER	1	1	2309.8875	0.154597557	0.132812553	0.041224301	0.053699153	15.34400164
748	am114	SHF	BIBLE	1	1	1306.6665	-0.082751355	-0.010902426	-0.001187958	0.046321558	-2.81268988
749	am114	SHF	TAXI	1	1	2787.3639	0.073975026	0.028864064	-0.001340931	0.030819118	-6.32130824
750	am114	SHP	CORN	1	0	3835.5604	0.123829604	0.087745074	0.042612967	0.033426533	-1.414404763
751	am114	SHF	CANNON	1	0	1408.6097	0.068915602	0.121587436	0.015857808	0.042616513	12.49280162
752	am114	SHP	KITTEN	1	0	2364.811	-0.063577534	0.110966323	0.026091427	0.050394925	-1.05104452
753	am114	SHF	CHERRY	1	1	1783.6273	0.031620431	0.090751216	0.014165088	0.062435607	2.582189318
754	am114	SHP	FLAG	1	1	3728.2594	0.148958528	0.225892528	0.063308114	0.069405302	3.827368311
755	am114	SHP	BALLOON	1	1	2669.3662	0.171966785	0.026214161	0.098099284	0.069859621	15.63089262
756	am114	SHF	CHICKEN	1	0	2631.1279	0.039728976	0.047017557	0.022905973	0.051865667	26.9075252
757	am114	SHP	BACON	1	1	2507.1606	0.009481852	0.105350737	0.006765444	0.063155474	21.36609832
758	am114	SHF	SEAL	1	1	2186.8914	0.104538186	0.025661419	0.039511343	0.06860408	25.97194686
759	am114	SHP	TROPHY	1	1	2008.2021	-0.030374533	-0.098473487	0.040759015	0.058699781	12.47827071
760	am114	SHP	SCISSORS	1	1	2216.6023	0.134774592	0.160025459	0.042892083	0.080156162	23.33795535
761	am114	SHP	WOLF	1	1	2906.8436	0.049341297	-0.054031244	0.074907171	0.055304819	26.10423365
762	am114	SHF	PAINTBRUSH	1	1	2001.7036	-0.005147912	0.14407903	0.029554952	0.063843867	1.9236706
763	am114	SHF	PIE	1	0	1349.4878	-0.015119593	0.055083145	0.004458209	0.045448397	-2.990535639
764	am114	SHF	BADGE	1	1	3308.6176	-0.017315517	0.053753989	0.011909243	0.056838359	10.43695238
765	am114	SHP	VIOLIN	1	1	1432.5606	-0.06006441	0.102911731	0.052033478	0.049130588	4.348590677
766	am114	SHP	BROOM	1	1	1653.1702	-0.110875758	0.018629268	0.072116908	0.049051437	-2.695498855
767	am114	SHF	PYTHON	1	1	1558.7437	-0.054971574	-0.03390517	-0.031356457	0.040410694	12.9508444
768	am114	SHP	PAIL	1	1	1580.0844	0.111552909	0.072247044	0.044895847	0.051220835	10.87462065
769	am114	SHP	FLASK	1	1	2065.8158	0.07362831	0.110009979	0.023234313	0.043032914	9.222095117
770	am114	SHF	OVEN	1	1	1468.6159	0.094095082	0.03497493	0.003322624	0.058696165	10.03972683
771	am114	SHP	HAM	1	1	1989.6011	0.015366109	0.097228792	0.043342941	0.032498652	13.79063862
772	am114	SHF	DEER	1	1	1564.9726	0.089640634	0.060689462	0.03596272	0.061891708	7.304444071
773	am114	SHF	UMBRELLA	1	0	1855.6717	-0.049922184	0.240663455	0.03237066	0.066887479	8.86740736
774	am114	SHP	CAMERA	1	1	3740.4515	-0.04524635	0.027134099	-0.021887701	0.026847389	8.863969519
775	am114	SHP	LAMP	1	1	3101.7773	0.055406597	0.006148922	0.077623245	0.075982953	-9.597661883
776	am114	SHF	HOOK	1	1	1258.1594	-0.083193351	0.027842444	0.028785988	0.085591836	8.384170164
777	am114	SHF	MUG	1	0	1780.4695	-0.012959513	0.040640706	0.026633001	0.061727434	-5.745449899
778	am114	SHP	ROCKET	1	1	1570.5218	0.115355383	0.113896951	0.098294892	0.072193726	3.34491569
779	am114	SHF	GUITAR	1	0	1416.1916	-0.078398284	0.04448217	0.02572344	0.057596037	-5.39442847
780	am114	SHP	ANCHOR	1	1	1512.748	0.114849657	0.054747709	0.061711004	0.026346894	6.077969524
781	am114	SHP	RABBIT	1	1	2305.8055	-0.00981255	0.046613851	0.021223343	0.040105234	22.11065842
782	am114	SHP	SOCK	1	1	1644.1163	0.07552857	0.02501467	-0.003620614	0.036203589	-11.19668829
783	am114	SHP	DESK	1	1	1876.9565	0.122538753	0.029839469	0.055548717	0.042939165	18.5394705
784	am114	SHP	ARROW	1	1	2222.1569	-0.06683188	-0.088452771	0.009657743	0.019021066	8.503139311
785	am114	SHF	STRING	1	1	1998.0934	0.131074092	0.153282675	-0.003635728	0.031381205	20.76088456
786	am114	SHF	MONKEY	1	0	1401.194	0.119485528	0.049134722	0.017679392	0.048637755	3.93222836
787	am114	SHP	KETTLE	1	1	1887.7733	0.063983909	0.094396669	0.030920857	0.067095918	8.402952875
788	am114	SHF	SPOON	1	1	3882.0561	-0.034652613	-0.011008628	0.010938904	0.054576951	-10.29163759
789	am114	SHP	MUFFIN	1	1	2080.7962	-0.057195473	-0.00749038	0.024915743	0.059727062	-1.52068545
790	am114	SHF	RAILROAD	1	1	4343.3741	0.122212543	0.113283336	0.039318487	0.061184172	20.98079257
791	am114	SHP	PENNY	1	1	1579.6202	0.007977485	-0.020989842	0.048851619	0.072136068	20.42563014
792	am114	SHP	FORK	1	1	1717.1664	0.144551584	0.083524619	0.061378555	0.045933255	12.60093129
793	am114	SHP	COFFEE	1	1	3205.0709	0.06702223	0.080033849	0.044985505	0.046764167	26.65533224
794	am114	SHF	STOOL	1	1	1128.2122	-0.011710479	0.050816471	-0.005606461	0.071151788	4.007403935
795	am114	SHF	DRUM	1	0	1816.7101	-0.037533236	0.104230744	0.010624126	0.053057012	29.23016936
796	am114	SHP	DUCK	1	1	3097.5488	0.074020685	0.132073186	0.072618608	0.075079648	9.55985371
797	am114	SHP	MOUSE	1	1	1418.2082	-0.039109228	-0.032919039	0.014095419	0.058823034	-1.932431893
798	am114	SHF	GLASSES	1	1	1931.2619	0.089816846	0.170816384	0.004419446	0.068350475	-5.899379324
799	am114	SHP	MILK	1	1	2391.7265	-0.06780187	0.148683173	0.04221417	0.037359906	8.812754485
800	am114	SHP	LADDER	1	1	2099.958	0.180109621	0.081606215	0.059380388	0.035680784	-0.789377129
801	am114	SHP	WHIP	1	1	1728.7173	0.039496496	0.076426432	0.03659231	0.035059073	7.236557446
802	am114	SHP	PARADE	1	1	2093.6992	0.074441548	0.213408317	0.033902234	0.060789325	12.97973853
803	am114	SHF	SHEEP	1	1	1807.5504	0.133974504	0.078023624	0.00935055	0.05281579	6.233231142
804	am114	SHF	BANANA	1	1	2934.8716	0.042877744	0.020680088	-0.00674656	0.068264469	-7.266938231
805	am114	SHF	HOSE	1	1	2273.1547	-0.044378354	-0.028069239	0.001405962	0.053538334	13.99391834
806	am114	SHF	CANOE	1	0	2501.9619	-0.041529959	0.115623412	0.009484669	0.052235997	-1.819496648
807	am114	SHF	CEREAL	1	0	1130.364	0.027069648	0.018581034	-0.007164429	0.069933935	3.76449031
808	am114	SHF	QUILT	1	0	1467.3692	-0.016243077	0.160441818	0.019676333	0.061060314	19.89031886
809	am114	SHP	SYRUP	1	1	1366.9248	0.107186406	-0.064904646	0.039603117	0.02750238	14.72714347
810	am114	SHF	HONEY	1	0	1266.9008	-0.105121343	-0.072301231	-0.025060433	0.080624943	-0.55993361
811	am114	SHP	FAN	1	1	4258.9736	-0.079097203	0.079986131	0.080383265	0.026474345	-13.92900586
812	am114	SHF	NAPKIN	1	0	2034.1025	0.108301245	0.062078367	0.016391203	0.054063463	-1.614417893
813	am114	SHF	NEST	1	0	3414.7011	-0.081198051	0.049671771	-0.01531395	0.050031636	-15.71994196
814	am114	SHP	DIAMOND	1	1	1236.9884	-0.011077623	-0.021575902	0.044578151	0.050472674	14.44512984
815	am114	SHF	OTTER	1	1	1707.9022	-0.00077015	0.068525776	0.016790438	0.062823153	4.008129712
816	am114	SHP	NEEDLE	1	1	2111.2649	0.139950056	-0.018453306	0.034808225	0.045770009	-5.919080665
817	am114	SHP	LION	1	0	3363.9949	0.225237963	0.11621908	0.1009964	0.098578721	-4.01742032
818	am114	SHP	CLOCK	1	1	2662.4508	0.113546449	0.020478754	0.10664771	0.072735089	26.81252348
819	am114	SHP	LIME	1	1	1853.314	0.22007558	0.097160825	0.062824873	0.077099993	3.175691355
820	am114	SHF	DOLL	1	1	2501.521	0.01976507	-0.018733608	-0.003904544	0.061973188	14.70358208
821	am114	SHF	MUSTARD	1	0	1795.6159	0.040828782	0.081892531	-0.035007861	0.064866791	9.454902319
822	am114	SHP	BUTTER	1	1	2481.8149	0.078583946	-0.000126136	0.062687459	0.037185003	15.3526768
823	am114	SHF	CAPE	1	1	1777.232	0.104112881	0.13315307	0.023471044	0.074280624	-7.527822298
824	am114	SHF	CIGAR	1	0	1328.1493	-0.04204953	-0.009060354	-0.000549184	0.058627085	-0.228661101
825	am114	SHF	SHOVEL	1	0	1382.3745	0.235233374	0.124609142	0.017689798	0.044852575	-6.021876756
826	am114	SHP	MOTH	1	1	1851.7883	0.033564125	0.050003753	0.060344114	0.041632433	-11.02281296
827	am114	SHF	GOAT	1	1	1307.0543	-0.015965568	0.140214776	0.034300295	0.033222046	9.931221299
828	am114	SHP	JELLY	1	1	1845.9879	0.003548458	0.061428629	0.064226626	0.06436064	13.22768611
829	am114	SHP	TIGER	1	1	1268.2491	-0.063852807	0.103573019	0.029763807	0.064635639	7.962844646
830	am114	SHF	COUCH	1	1	1461.6182	0.040372158	0.019639539	0.014059641	0.039445205	-0.610868184
831	am114	SHF	SWORD	1	1	1683.5799	0.025935023	0.084175947	0.021628709	0.050083952	0.373066437
832	am114	SHP	PAN	1	1	1179.7125	0.124453512	0.093405147	0.054120693	0.047575498	-17.95783392
833	am114	SHF	WINE	1	0	2792.1295	0.008175772	0.0564083	-0.035792546	0.042266462	8.653106606
834	am114	SHP	PIANO	1	1	1883.3414	0.045262899	0.090934532	0.098060333	0.052961586	0.065008069
835	am114	SHF	CARROT	1	0	1411.4102	0.04722887	0.024757459	0.031877041	0.062175584	3.069725569
836	am114	SHF	STAPLER	1	1	1407.1945	0.073018405	0.046758316	-0.005573674	0.063927608	-1.265106117
837	am114	SHF	MITTEN	1	1	1465.3735	0.141161188	0.159110118	0.010951072	0.057559319	-23.51057333
838	am114	SHP	FENCE	1	1	2161.4682	0.079317439	0.025540052	0.070880535	-0.014595185	10.58225475
839	am114	MF	MAP	0	0	1493.3551	-0.041690665	0.08078576	-0.045013311	0.088002762	-3.809703435
840	am114	IP	SPONGE	0	0	3250.6586	-0.033005802	0.040398927	-0.001371938	0.043486613	-1.938687935
841	am114	SMP	CANDLE	0	1	2594.4433	0.12997015	0.058621576	0.043690405	0.111257133	1.067935722
842	am114	IF	PIGEON	0	0	3527.5097	0.043790332	0.136615351	-0.036774209	0.074523683	17.15097379
843	am114	IP	APPLE	0	1	3499.6563	-0.063669907	0.046003082	0.034805518	0.032601628	14.85047581
844	am114	IP	SOUP	0	0	3455.837	0.044922354	0.05574101	-0.003416216	0.022620375	1.482599652
845	am114	IF	OYSTER	0	0	3277.4084	0.128101396	0.095769827	-0.024807459	0.043407701	-12.23663183
846	am114	IP	PHONE	0	0	3351.9807	-0.077893048	0.150654584	-0.010956506	0.024270825	8.306797867
847	am114	IF	SOAP	0	0	3776.5018	-0.022706415	0.093419558	0.007059434	0.079383488	3.783728171
848	am114	MF	BENCH	0	0	3330.9196	0.333665433	0.245709675	-0.011203806	0.046943122	-35.56606883
849	am114	IF	CAKE	0	1	4316.1866	-0.040908525	0.080968416	-0.007045646	0.032598184	-15.77475101
850	am114	MF	ELEPHANT	0	1	4708.1704	0.005512399	0.129040765	0.003506642	0.083165311	9.265300033
851	am114	IF	BRAIN	0	0	4383.0378	0.077088886	0.069920817	0.02725016	0.111265947	-0.018536193
852	am114	MF	MOON	0	1	1817.2552	-0.013413819	0.00562561	0.006310777	0.089089799	10.58764453
853	am114	MP	TURTLE	0	0	2798.4957	-0.0340578	-0.076841949	-0.010145845	0.040667088	-25.29048872
854	am114	MP	PURSE	0	0	3943.2857	0.017305072	-0.055700647	0.005663857	0.015721961	-8.09955924
855	am114	SMP	JACKET	0	0	3435.5205	0.118735358	0.107352449	0.043082284	0.016191335	-15.76856212
856	am114	IP	BARREL	0	1	3240.6953	-0.188173996	0.002553036	0.000317744	0.011980362	17.66230794
857	am115	SHP	CORN	1	0	1680.2401	0.038684701	0.092682573	0.002131058	0.006233138	-6.976555634
858	am115	SHP	TOAST	1	0	3205.7549	0.0398196	0.055905985	0.027797846	0.037042264	13.20833075
859	am115	SHF	KNIFE	1	1	1440.958	0.160202896	0.237050783	-0.022853754	-0.036090895	13.20080381
860	am115	SHF	CRADLE	1	0	1300.4923	-0.035710578	-0.100497485	-0.010624443	-0.035076204	-20.2775451
861	am115	SHF	CASTLE	1	0	2407.5936	0.115692205	-0.041372775	0.017659984	0.005924809	0.475827137
862	am115	SHP	MONKEY	1	0	2935.1768	-0.100439648	-0.103088624	0.013441833	-0.024487846	3.993813434
863	am115	SHF	SEAL	1	0	3220.246	-0.155331047	-0.031509283	0.022702295	0.002473834	10.63483781
864	am115	SHP	SOCK	1	0	2415.7147	-0.181487845	-0.008802575	0.024247175	0.033580315	4.370253329
865	am115	SHF	BARREL	1	0	3012.8992	-0.016720304	-0.142515772	0.0148174	0.008846233	15.9917174
866	am115	SHP	ORANGE	1	0	2116.3041	0.106001388	0.099009927	0.027077728	0.027389073	3.759039323
867	am115	SHF	CROWN	1	0	3228.4713	0.050399889	0.127394951	0.021525664	0.038800223	3.285573944
868	am115	SHF	NAPKIN	1	1	1101.013	0.215197586	0.201433862	0.038536499	0.043301153	-7.790051538
869	am115	SHP	HIGHWAY	1	0	3111.062	0.180888477	0.164405119	-0.041352971	-0.014816549	-2.908643178
870	am115	SHP	CAKE	1	0	1986.7083	-0.142587023	-0.067328087	-0.014315022	-0.019933567	1.946172485
871	am115	SHF	BROOM	1	0	1726.2486	0.149392015	0.150169693	0.031069857	0.042101472	5.958352793
872	am115	SHF	CANDLE	1	0	2129.5039	0.242855333	0.031611883	-0.009875076	0.009517782	5.166642368
873	am115	SHP	BELL	1	0	1991.8299	0.066629968	-0.111335423	0.042439982	0.052039198	18.23246344
874	am115	SHP	PIGEON	1	0	2029.6576	0.109232845	-0.167446623	-0.062197519	-0.031852837	-1.45512871
875	am115	SHF	SHOVEL	1	0	1712.4222	-0.039390825	-0.05098401	0.03841196	0.044844081	5.303145057
876	am115	SHP	HOSE	1	0	1870.4257	-0.132936557	0.057806764	-0.04355576	-0.022986493	7.306933856
877	am115	SHF	VIOLIN	1	0	1454.8234	-0.153258987	-0.035292335	0.02484778	0.017314445	4.56170717
878	am115	SHF	CANNON	1	0	1786.1377	0.110329358	0.021837157	0.009774561	-0.020181405	-2.258507817
879	am115	SHP	PLATE	1	0	1007.6585	0.097065414	-0.037102358	-0.034753091	0.007369419	-10.79535803
880	am115	SHF	COUCH	1	0	1638.9553	0.018009688	0.120409442	0.021992464	0.04016971	-4.094842154
881	am115	SHF	CEREAL	1	0	1771.8101	0.057237389	0.039897341	0.024183713	0.053955313	-10.14172037
882	am115	SHP	TURTLE	1	1	2000.5578	-0.063667685	-0.177826609	-0.005323562	-0.040738035	5.348645397
883	am115	SHF	MOUSE	1	0	1343.2078	-0.153184708	-0.134409799	-0.019346074	0.01952701	-8.620575961
884	am115	SHP	OTTER	1	0	2544.2139	-0.121264847	-0.052670839	-0.020870049	-0.014627597	17.50981787
885	am115	SHF	WOLF	1	0	1037.0805	0.104494388	-0.030421765	0.010295493	0.007583917	16.49088537
886	am115	SHF	KETTLE	1	0	1381.5053	-0.151849687	-0.12733931	0.038692791	0.047766603	3.396436789
887	am115	SHP	CANOE	1	0	3818.8066	-0.083852568	0.004033485	-0.00275986	0.006063311	9.969608749
888	am115	SHP	MITTEN	1	0	1873.938	0.115635199	0.069274824	-0.060254593	-0.037540048	-0.762024429
889	am115	SHP	PYTHON	1	0	2094.5624	0.013467351	0.020981848	-0.038669736	0.002895507	4.2956089
890	am115	SHP	SHOWER	1	0	1460.4553	0.150913813	-0.007181792	-0.029668555	-0.01412011	9.611000395
891	am115	SHP	FORK	1	1	1392.2539	0.025926207	0.100429741	-0.031883656	-0.060968774	24.55408997
892	am115	SHF	CAGE	1	1	1510.1447	0.042957908	0.04525294	-0.006743708	0.050271033	4.014143042
893	am115	SHP	ENVELOPE	1	0	1460.3332	0.088061384	-0.094206147	0.007761648	-0.016595002	8.486894761
894	am115	SHP	SPONGE	1	1	2809.9289	0.074269755	-0.074185616	-0.00736591	0.000451547	6.038399545
895	am115	SHF	LAMP	1	0	1405.3544	-0.014938882	0.118484678	0.026250543	0.044265427	-1.086327226
896	am115	SHP	HOOK	1	1	1827.5708	0.210144092	0.24000962	0.01840088	-0.007803132	-20.38113249
897	am115	SHF	LOCKER	1	0	1275.8741	0.093603165	0.199351815	0.033615673	0.044795984	-1.694125085
898	am115	SHF	MOON	1	0	2001.151	0.009539079	0.100044002	0.013761502	0.031913617	-6.239478724
899	am115	SHF	QUILT	1	0	1423.2587	0.014357472	-0.019834222	0.003877481	-0.006066236	2.28025361
900	am115	SHP	SWORD	1	0	2458.7226	0.068170806	0.117282983	0.005477024	0.012757132	5.336159049
901	am115	SHF	UMBRELLA	1	0	2098.0541	-0.256424273	0.073407564	0.03048185	-0.013379104	13.15675785
902	am115	SHP	CAMERA	1	0	2571.5774	-0.118685966	-0.164163843	0.00849188	0.042925297	-3.028922988
903	am115	SHP	SHEEP	1	0	2409.5939	-0.112355278	-0.110906805	0.006958778	0.047947392	-3.907972577
904	am115	SHF	MANURE	1	0	1240.1044	0.112480972	0.015813949	-0.015406359	-0.0174703	6.205930939
905	am115	SHP	PENNY	1	0	1796.2025	-0.052096063	-0.0796898	0.043139451	0.038605179	11.30659964
906	am115	SHP	CIGAR	1	1	1635.1456	0.193029324	0.200594895	-0.002127885	0.015649447	20.87340984
907	am115	SHF	GLASSES	1	0	1394.1978	0.06425712	0.235476185	0.0310525	0.048533556	-5.927151427
908	am115	SHF	WALLET	1	1	1344.1892	0.062259018	0.020416808	0.013263929	0.024884272	-2.527822647
909	am115	SHF	COFFEE	1	0	1177.2209	0.216828199	0.021348156	0.015912465	0.00829073	0.690630104
910	am115	SHF	BASKET	1	0	1447.5792	-0.080035434	0.127766027	0.003580981	0.021631502	-15.64885129
911	am115	SHP	DOLLAR	1	1	1577.3325	-0.100135834	0.032095106	-0.037195215	0.005735384	-6.443747113
912	am115	SHP	MUSTARD	1	1	1220.3702	-0.146616733	-0.175533302	-0.027584017	-0.021823378	2.554729787
913	am115	SHP	PAINTBRUSH	1	1	2760.1318	0.221534952	0.202225302	-0.026828597	-0.03304363	-20.17300354
914	am115	SHF	ROSE	1	0	1183.2344	0.377641809	0.179487091	0.037587533	0.028087837	17.62610604
915	am115	SHP	STRING	1	0	2216.0511	-0.059953329	0.030580072	0.028682658	0.028862737	-3.684987171
916	am115	SHF	MILK	1	0	1084.1358	0.063532444	0.05440245	0.017220144	0.00993732	18.28648442
917	am115	SHF	CLOCK	1	0	1635.65	0.078341416	-0.169268599	0.019575148	0.01409737	-1.097929007
918	am115	SHF	JACKET	1	0	1091.3877	-0.188346168	-0.096955322	0.036219799	0.035534681	3.634763527
919	am115	SHF	POTATO	1	0	1436.3044	-0.065501256	0.009625804	0.022666186	0.009334501	4.884444444
920	am115	SHF	FLAG	1	0	1244.8748	0.074799844	0.081451499	0.021330822	0.02676693	-10.26848847
921	am115	SHF	JELLY	1	1	718.582	0.126088832	0.150012373	0.014108264	0.020442005	5.51606276
922	am115	SHP	MAGNET	1	0	1380.6337	0.070083842	0.1276481	-0.024250558	-0.014606735	-15.52141791
923	am115	SHP	BUTTER	1	0	2811.92	-0.024649927	0.033553851	0.032633731	0.038054445	6.683343629
924	am115	SHP	NEST	1	0	1266.5572	-0.07713223	-0.011836762	-0.040149939	-0.031571992	2.893578966
925	am115	SHF	CANE	1	0	3755.1449	0.251146201	0.141406163	0.036175211	0.034945704	1.466065587
926	am115	SHF	CHERRY	1	0	1812.9064	-0.084133595	0.036014018	0.035560149	0.024171858	-0.210015598
927	am115	SHP	TRAY	1	0	1382.468	0.054865914	0.102067749	0.012749896	0.026293939	23.21202889
928	am115	SHP	KITTEN	1	1	1150.3007	-0.345678999	-0.21107262	-0.025663792	-0.026777737	5.678143445
929	am115	SHF	SOUP	1	0	2636.5953	-0.014973032	-0.097900804	-0.006319123	0.000457508	2.895895236
930	am115	SHF	SCISSORS	1	0	1034.5963	-0.027141227	-0.051187451	0.033171294	0.017767545	-8.326823056
931	am115	SHP	ROPE	1	0	1689.4671	0.066631434	-0.049775972	0.031570965	0.029129521	0.352452942
932	am115	SHP	TOILET	1	0	3190.7729	-0.08371733	0.003598987	-0.013847252	-0.008074305	12.46189329
933	am115	SHF	MUG	1	0	996.7819	-0.080231544	-0.169017481	-0.019645006	0.009202013	-10.72302013
934	am115	SHF	BOWL	1	0	3337.6127	0.028274694	0.041684377	-0.023802898	-0.001627995	-25.64414388
935	am115	SHF	PHONE	1	0	2252.3498	0.071571694	-0.086535706	-0.012948	-0.008578625	5.881832482
936	am115	SHF	MOTH	1	1	1796.1031	-0.06098122	0.068776779	-0.016047734	-0.008570205	4.551413976
937	am115	SHP	WINE	1	0	1250.4964	0.095688484	0.020196346	0.006008441	0.008599582	3.950609447
938	am115	SHP	PIANO	1	1	1690.2669	-0.335153718	-0.011032777	0.006536687	0.016989107	10.09745529
939	am115	SHF	ELEPHANT	1	0	1286.5582	0.283705338	-0.021096962	-0.005919495	-0.008483765	-23.61750385
940	am115	SHP	DRUM	1	0	2373.2641	-0.338542818	-0.083170795	0.038965754	0.032374502	9.193239253
941	am115	SHF	LION	1	0	1071.5957	0.194051188	0.062938444	0.003424877	-0.004365538	8.191519493
942	am115	SHP	BRAIN	1	1	2089.1865	0.141829887	-0.00087353	0.032831534	0.02350106	4.415842722
943	am115	SMF	ANCHOR	0	0	2831.3934	-0.026391925	0.048326224	-0.008505825	-0.004532373	-5.126754157
944	am115	SMP	RAILROAD	0	0	3397.6136	-0.163619362	-0.12109194	0.013600891	0.071811259	17.11158862
945	am115	SMF	CHEESE	0	0	3255.0059	-0.093707963	-0.006988452	0.034331081	0.015396939	9.356106349
946	am115	IP	TIRE	0	0	1873.1929	-0.007971734	0.095257004	0.150413135	0.106668348	-12.13578983
947	am115	SMF	TAXI	0	0	2528.6423	0.157996582	0.145252619	0.084718678	0.051422831	7.803072837
948	am115	SMF	OVEN	0	0	3260.063	0.096218619	0.024354791	0.05640022	0.089883259	2.05331833
949	am115	SMP	PIE	0	0	2025.6651	-0.019416066	0.028436247	0.035616829	0.037721871	2.8534858
950	am115	SMP	PILLOW	0	0	1428.6113	0.097760429	-0.07012525	-0.025895941	0.019715305	-9.953573157
951	am115	SMF	APPLE	0	0	1924.7778	0.239482597	-0.114769499	0.04727159	-0.017305456	1.937061148
952	am115	SMP	FAN	0	0	1249.6842	0.097599821	0.097472863	-0.051404185	0.007811544	-7.176845772
953	am115	SMF	NEEDLE	0	0	1744.2386	0.160289307	0.164594342	-0.005996158	-0.006746347	-1.616172713
954	am115	SMP	HAMMER	0	1	1845.8544	0.029270438	0.169875118	0.127235714	0.072952678	-6.037746959
955	am115	SMP	STAPLER	0	0	1432.3211	0.006858019	-0.100957458	0.020705008	-0.032759096	-6.160259265
956	am115	SMP	CRAB	0	0	1318.228	0.038533993	0.1424913	-0.000851907	-0.042088483	-0.123215499
957	am115	SMP	HONEY	0	0	2660.3503	-0.02511831	-0.031290171	0.038521033	0.029517024	7.461515493
958	am115	SMP	BADGE	0	0	1055.5324	-0.11160873	-0.028318577	0.003734357	0.023533759	-4.077987067
959	am115	SMP	CAPE	0	0	1589.9124	-0.065149492	-0.027612987	0.096707526	0.067417843	-15.29460863
960	am115	SMF	BENCH	0	0	2833.1445	0.034831892	0.099082435	0.009151618	-0.007170701	-3.240297871
961	am115	MP	STAR	0	1	3459.3996	0.102043852	-0.024057958	0.097612312	0.005169289	-2.097315062
962	am116	SHF	PHONE	1	0	2233.7141	0.013792038	0.118134313	-0.008856239	0.029644074	21.88171303
963	am116	SHP	VIOLIN	1	0	3420.711	0.244084376	0.06475099	-0.021334589	0.014822429	6.60916305
964	am116	SHP	OTTER	1	0	3276.5945	0.027137151	0.022907066	-0.011373386	0.040610254	-8.960652379
965	am116	SHF	MUFFIN	1	0	2658.0293	0.074554364	0.009390092	0.012272546	0.004887184	9.970933992
966	am116	SHP	TRACTOR	1	0	2415.9649	0.005433858	0.085947971	-0.004638568	0.05306057	13.16663722
967	am116	SHF	DESK	1	1	3355.4071	0.201776248	0.178433201	0.00316349	0.050553627	-20.0223452
968	am116	SHF	PAIL	1	0	2258.6184	-0.140162592	-0.002571603	-0.00686149	0.024557855	25.41894423
969	am116	SHP	SHEEP	1	1	2188.0358	0.08944625	0.20732357	0.032103819	0.074158418	17.43814743
970	am116	SHP	STAR	1	1	2634.0827	0.009945752	-0.000108045	0.054233007	0.064355156	-7.057698362
971	am116	SHF	CRADLE	1	0	2736.3866	0.231332192	0.039858269	0.033706936	0.020122789	-5.221971394
972	am116	SHF	CEREAL	1	1	2348.5435	-0.183592554	0.049557283	0.019196776	0.005229375	5.42379006
973	am116	SHP	WOLF	1	0	3537.9286	0.070969152	0.206111644	-0.009981574	0.019231104	9.01360383
974	am116	SHF	CASTLE	1	0	1802.8478	0.339315511	0.151281911	0.047916375	0.022343963	-43.77787123
975	am116	SHF	SOUP	1	1	2769.9715	0.353949178	0.207609116	0.019791595	-0.019394892	-5.226468093
976	am116	SHP	COFFEE	1	1	2344.5282	0.163066271	0.111602412	0.001176282	0.037378543	18.71843908
977	am116	SHP	LOCKER	1	0	3174.2999	-0.036846704	0.026963151	0.0329244	0.038529493	-4.980877554
978	am116	SHF	PAN	1	0	2266.1771	-0.002756767	-0.049932621	-0.038422326	0.001140408	-12.43874448
979	am116	SHF	LIZARD	1	0	2336.8639	0.045741283	0.120704308	0.017688767	0.031989333	-3.295457063
980	am116	SHF	CHEESE	1	1	2476.3581	0.231475296	0.057375426	-0.004565903	0.029013373	-23.91876542
981	am116	SHF	BANANA	1	0	2360.4852	-0.537490792	-0.213020442	-0.021734934	0.022762861	14.50146877
982	am116	SHP	RABBIT	1	0	3353.2859	0.030036531	0.099756057	0.010902643	0.023792994	-1.249790932
983	am116	SHP	GOAT	1	0	1438.953	-0.087504076	-0.241309829	0.013614422	0.042060742	-6.99029783
984	am116	SHF	SOCK	1	0	2212.1556	-0.095163185	0.149631059	-0.025898454	-0.017997299	-3.722682377
985	am116	SHF	NET	1	0	2120.6951	0.104212377	-0.08035524	-0.033001373	-0.005928167	6.602178588
986	am116	SHP	CARROT	1	0	1962.9234	-0.213318621	-0.038684638	0.02814696	0.047513047	-7.377753646
987	am116	SHP	PLATE	1	0	2562.0677	-0.08332068	0.007196368	0.007438207	0.044307424	11.11124976
988	am116	SHP	FAN	1	0	3698.0646	0.035166902	0.051891335	0.021856798	0.024860958	-3.595421098
989	am116	SHF	WINE	1	0	2085.6549	0.227650386	-0.053439097	0.035494534	0.025599797	2.698575079
990	am116	SHP	SHOWER	1	0	2600.297	-0.315929837	0.087963923	0.030443487	0.017313546	18.95375343
991	am116	SHP	DRUM	1	0	2606.8635	0.043965258	0.084987183	0.022491242	0.041849353	6.989762931
992	am116	SHF	SWORD	1	1	1574.259	0.017357101	0.106495235	0.011998192	0.014222178	-13.98449384
993	am116	SHP	CHICKEN	1	1	2574.6737	0.148467483	-0.016639273	0.005288737	0.024424108	0.046830375
994	am116	SHF	LADDER	1	1	1593.557	-0.060568305	-0.004551468	-0.013045787	0.018753443	-16.56097373
995	am116	SHF	PYTHON	1	1	1772.7513	0.272671383	0.186628212	-0.007587199	0.03278574	7.000003834
996	am116	SHP	KEG	1	1	2597.251	0.094364828	0.051541511	0.021389547	0.061080787	29.70984785
997	am116	SHF	MAP	1	0	3078.5228	-0.066018093	-0.05703984	0.027464173	0.039018836	38.11125922
998	am116	SHP	SOAP	1	0	2913.3893	0.247035212	0.246047112	0.010316343	0.034189822	1.77170908
999	am116	SHP	ROSE	1	0	3227.6539	0.55051537	0.237932842	-0.000146013	0.00392161	6.276563025
1000	am116	SHF	BONE	1	0	1395.2897	0.124616607	0.065413094	0.044581167	0.031285369	-52.76257338
1001	am116	SHP	MOUSE	1	0	2485.1669	0.030624735	0.164881335	0.010119847	0.053827594	-30.51058522
1002	am116	SHP	UMBRELLA	1	0	1853.9775	0.054479587	0.183809743	-0.030257928	0.060909528	16.9702869
1003	am116	SHP	ELEPHANT	1	0	2455.2743	-0.282215994	-0.203016731	0.031023519	0.062146143	-5.878637424
1004	am116	SHF	COUCH	1	1	1483.0638	0.167186083	0.005790165	-0.00838639	0.045050126	-10.09832671
1005	am116	SHP	CAKE	1	1	2469.8647	-0.127381633	-0.002767122	0.052687604	0.069366029	-1.186508498
1006	am116	SHP	GUITAR	1	0	1855.2732	0.168809201	-0.206100731	-0.019370042	0.003905938	46.12048924
1007	am116	SHP	MILK	1	0	1899.7067	-0.075929564	0.098304994	-0.012955914	0.042442657	-1.543469482
1008	am116	SHF	CIGAR	1	0	2025.4554	-0.165227911	0.132703073	0.022253819	-0.006936672	-1.8190298
1009	am116	SHF	HOSE	1	1	1955.4861	0.213114831	0.073811948	0.025459467	0.028766071	1.735027686
1010	am116	SHP	LAMP	1	0	2613.5128	0.188090695	0.14966616	0.059083977	0.051923482	-14.94564952
1011	am116	SHF	BACON	1	0	1691.0412	0.088784148	0.153521591	0.010300142	0.033999204	-3.980151541
1012	am116	SHF	CORN	1	1	1571.9743	-0.122240704	-0.095213596	0.060102147	0.019356879	-37.79996996
1013	am116	SHF	FLAG	1	0	2462.1565	0.196148029	-0.05882576	0.04086275	0.000699651	-23.36067832
1014	am116	SHP	DIAMOND	1	0	2194.4384	-0.002517695	0.075025072	0.003705512	0.023907507	4.557880066
1015	am116	SHP	OMELET	1	0	2295.1134	0.060662655	-0.059327792	-0.033909052	0.021577221	-5.02792864
1016	am116	SHP	WALLET	1	0	2555.4713	-0.023093116	-0.059647129	0.011731987	0.034215315	-6.84125353
1017	am116	SHF	BARREL	1	0	2475.4343	0.133891348	0.280482154	0.008287406	-0.036071477	-5.369342965
1018	am116	SHF	JACKET	1	1	2841.5466	-0.109491071	-0.210072335	-0.0004516	0.032065827	-3.757273772
1019	am116	SHP	POTATO	1	1	2237.2833	-0.077837646	0.024488714	-0.035638162	0.006465278	-8.184770521
1020	am116	SHF	BENCH	1	0	1785.805	0.061712658	0.039491743	-0.000661918	0.019799809	-9.668773284
1021	am116	SHF	PENCIL	1	0	2174.5302	0.191372881	-0.070057376	0.029592907	0.009846401	27.5816305
1022	am116	SHP	WHIP	1	0	1963.74	-0.078857877	-0.047948236	0.054779704	0.064839531	13.68930646
1023	am116	SHF	ROCKET	1	1	2234.7482	-0.004486258	-0.029442303	-0.002543772	0.016959611	23.05672651
1024	am116	SHF	KNIFE	1	1	1432.5061	-0.085020623	0.078263988	-0.012387469	0.011939665	-13.56077774
1025	am116	SHF	BROOM	1	0	1578.6741	-0.157377075	-0.005979326	-0.009908389	0.024330153	1.142351478
1026	am116	SHP	MOTH	1	0	1956.7867	-0.166152989	0.083079721	-0.009623191	0.016334607	-51.07266136
1027	am116	MP	NEEDLE	0	0	1145.0575	-0.030081313	-0.17510213	0.01076037	-0.00855661	-3.407380158
1028	am116	MF	TIRE	0	0	1097.8739	-0.152338435	0.075588693	0.002097197	-0.008615987	17.00182688
1029	am116	IP	KITTEN	0	0	2818.2896	-0.077471574	0.238465803	-0.007386278	0.040120354	8.791046007
1030	am116	SMP	HONEY	0	1	3416.7316	0.142789307	0.141227542	0.105572355	-0.001117382	21.69672803
1031	am116	SMP	MITTEN	0	1	3249.4337	-0.123277699	-0.08089494	-0.058032781	-0.034471199	21.0725237
1032	am116	MF	MAGNET	0	0	1615.8652	-0.239421764	-0.261362702	-0.081173429	-0.03020787	30.86415171
1033	am116	MP	MOON	0	0	2040.3929	0.124149912	0.202382113	-0.029257659	0.067918938	15.36974648
1034	am116	MF	PENNY	0	0	1390.7162	-0.170721019	-0.02237421	0.0115677	0.035094329	5.246796866
1035	am116	MF	RAILROAD	0	0	1694.4691	0.091648984	0.137964628	0.013382809	0.002922078	19.87704225
1036	am116	MP	GLASSES	0	1	2024.5909	0.585663119	0.22844111	0.157111152	0.093374819	8.684399512
1037	am116	IP	PIGEON	0	0	3042.0999	0.112813979	0.085599811	-0.037125618	0.057637444	-6.033237888
1038	am116	MF	ANCHOR	0	0	2807.8504	0.009645166	0.06416385	-0.064536488	-0.001235891	-12.87073592
1039	am116	SMP	CRAB	0	0	3579.8349	0.071867547	0.039258508	0.080709627	0.12218721	-5.510298722
1040	am116	MP	TOILET	0	0	3480.541	0.09688893	0.012677682	-0.009414204	0.009494609	-14.71215935
1041	am116	MF	CANOE	0	0	2208.0917	-0.054925234	0.04006142	0.03765358	0.009968177	25.63994715
1042	am116	SMP	STRING	0	1	2529.3025	-0.123141702	-0.074649788	0.041907482	0.02941999	24.74470258
1043	am116	MP	DOLL	0	0	1695.1411	-0.134159469	0.014936799	-0.011472964	0.036947801	-21.45771199
1044	am116	MF	LION	0	0	1565.5746	0.06343546	0.128465649	0.035810016	0.052197682	-6.576451141
1045	am116	MF	PURSE	0	0	3328.1879	-0.029498129	0.096475938	-0.056412886	0.032465908	-29.68179328
1046	am116	IP	CANDLE	0	0	3378.7044	-0.148001926	-0.061926871	-0.097568268	-0.036174414	24.89386531
1047	am116	SMF	DUCK	0	0	3121.5392	0.007313439	0.090538656	-0.111227728	0.019227883	-6.314364814
1048	am116	MF	APPLE	0	0	2849.1543	-0.094585623	-0.145478855	-0.049666294	0.008420282	6.58235473
1049	am117	SHP	MOTH	1	1	1438.7859	0.239073711	0.065272819	0.037999065	0.070169144	23.41885807
1050	am117	SHP	PYTHON	1	1	1468.7056	-0.13210118	-0.143438745	0.043055103	0.013861515	25.63924392
1051	am117	SHF	PURSE	1	1	863.4196	0.116328653	0.00593301	0.029841606	0.02314198	5.231815759
1052	am117	SHF	CEREAL	1	0	1748.935	-0.088489194	0.051798335	0.027472289	0.018278194	25.66509922
1053	am117	SHP	FAN	1	1	2356.6455	-0.080577871	-0.002706683	-0.015093158	-0.011407657	-5.899944765
1054	am117	SHP	ROPE	1	0	2165.11	0.114193061	0.165772654	0.098551003	0.081728761	18.55248776
1055	am117	SHP	MITTEN	1	0	2633.055	0.198019126	0.082983304	0.02619116	-0.017164876	-9.463676271
1056	am117	SHF	CANE	1	1	2559.115	0.008104993	-0.01926047	0.027978952	0.023290942	2.224959
1057	am117	SHP	SWORD	1	0	2440.7977	-0.009494829	-0.013273423	0.073287089	0.03674503	15.8684619
1058	am117	SHF	CAGE	1	1	1655.6166	-0.061806842	-0.09128944	-0.02244203	0.00227673	-14.77324751
1059	am117	SHF	TOAST	1	1	1776.3204	-0.203062086	-0.033342374	0.018162141	-0.00207769	-13.50214531
1060	am117	SHP	BARREL	1	0	2324.302	-0.170941186	0.027471766	0.091682334	0.087047986	-6.006092294
1061	am117	SHP	WHIP	1	1	1715.9147	0.309027312	0.05296266	0.136059864	0.110417375	6.844815818
1062	am117	SHF	STOOL	1	1	1547.5429	0.0667106	0.053270137	0.004920039	0.039271386	20.73522162
1063	am117	SHF	TROPHY	1	1	2502.6924	-0.138398458	-0.105744822	0.025437432	0.033986874	6.530875547
1064	am117	SHP	PAINTBRUSH	1	1	1673.778	-0.219717925	-0.199317022	0.095414712	0.119767419	-17.41566342
1065	am117	SHP	TRACTOR	1	1	1857.2007	0.251892901	0.003079632	0.117560308	0.084848509	36.94884296
1066	am117	SHF	POTATO	1	1	1325.7325	-0.210129881	-0.334434738	0.006372363	0.047276234	-8.890761622
1067	am117	SHF	CANNON	1	0	2648.9724	-0.08081599	-0.11937476	0.018279537	0.033279736	7.825291426
1068	am117	SHF	TRAY	1	1	1113.4392	-0.169060204	0.008737129	0.00033688	0.029690171	4.93144643
1069	am117	SHP	SCISSORS	1	1	1583.8637	0.278610923	0.111154352	0.043006181	0.002393225	8.275991223
1070	am117	SHF	LIZARD	1	1	1956.0559	0.16798799	0.113177629	0.045658153	0.016211106	-12.49940383
1071	am117	SHF	BALLOON	1	1	2511.9388	0.129582053	0.048131726	0.0397402	0.022203467	4.271313473
1072	am117	SHF	PIANO	1	1	1214.4343	-0.043376557	0.041406181	0.014429498	-0.029710328	7.385788962
1073	am117	SHF	HONEY	1	1	1583.0647	-0.063154341	-0.132803375	0.013593057	-0.011212471	6.945084556
1074	am117	SHF	HAMMER	1	1	2155.4806	-0.143901072	0.011540784	0.020703593	0.020221163	9.648094194
1075	am117	SHF	OMELET	1	1	2450.6205	-0.017959137	-0.119530646	0.047630594	0.043942328	0.690699494
1076	am117	SHP	PIE	1	1	1757.3295	0.101207695	0.183818904	0.051847505	0.037976423	22.34596497
1077	am117	SHP	STAPLER	1	0	1890.0879	-0.021601685	0.0482634	0.074231286	0.065490089	8.161157857
1078	am117	SHF	LION	1	1	2468.1176	-0.018381988	0.123013801	-0.004363301	0.043933847	4.591741846
1079	am117	SHP	CHERRY	1	1	3158.9204	0.127599407	-0.023213652	0.106448298	0.088972597	-0.371198726
1080	am117	SHF	SOCK	1	1	1322.4231	0.158433276	0.140243358	0.010048943	0.029489633	-2.867932872
1081	am117	SHF	QUILT	1	1	1668.0577	-0.055423389	-0.192114241	0.015414409	0.040382772	-10.22100425
1082	am117	SHP	UMBRELLA	1	1	1372.6961	0.211365983	0.095021085	0.080768477	0.022722688	0.306421245
1083	am117	SHF	NEEDLE	1	1	1396.2682	-0.097137221	0.012558742	0.034587709	0.003836431	-11.20780422
1084	am117	SHP	TAXI	1	1	1867.7089	0.010969061	0.044275151	0.078988588	0.023412627	11.26837512
1085	am117	SHF	WOLF	1	0	1313.776	0.145693426	0.099296869	0.023736956	0.030391312	14.78935727
1086	am117	SHF	LIME	1	1	1920.0201	-0.091099681	-0.0914989	0.004612554	0.027057386	24.16014912
1087	am117	SHF	PENCIL	1	1	1580.4269	0.181121131	0.0329804	0.060026484	0.0271877	5.929558185
1088	am117	SHF	FENCE	1	1	2361.1446	0.082209791	-0.043169067	-0.053545436	0.030488668	8.542571286
1089	am117	SHP	DIAMOND	1	1	3467.4332	0.030591176	0.005666601	0.077127222	0.090847611	7.893520793
1090	am117	SHF	RAILROAD	1	1	2591.1373	-0.01409106	0.084739168	0.092814816	0.076805598	-2.49034252
1091	am117	SHP	ELEPHANT	1	1	2081.8401	0.062938942	0.20696658	0.076599398	0.059227816	14.39348436
1092	am117	SHF	ANCHOR	1	1	2555.0371	-0.044373025	0.054310897	0.042444165	0.032410265	-9.145598402
1093	am117	SHP	HOOK	1	0	2584.6963	0.065207798	0.070259856	0.032581144	0.04766028	19.55650638
1094	am117	SHF	CAMERA	1	1	3178.9235	0.210344589	0.118838173	0.047581616	0.032144126	20.94631508
1095	am117	SHP	SOAP	1	1	1873.4059	0.2212074	0.133191902	0.076732843	0.091638905	-3.507904578
1096	am117	SHP	CASTLE	1	1	1958.7538	-0.078872316	-0.035268791	0.038940059	0.023216544	-2.960196771
1097	am117	SHF	PAIL	1	1	1583.461	0.074628587	0.110585572	0.038863114	0.018627808	1.19281713
1098	am117	SHF	OYSTER	1	1	2645.0501	0.04349667	0.026381244	-0.030520433	0.005966781	-6.687301116
1099	am117	SHP	BACON	1	1	2074.9844	0.396012303	0.173306821	0.084252079	0.054234963	24.43872623
1100	am117	SHP	GOAT	1	1	2692.895	-0.116478003	-0.080857269	-0.000931756	0.045692825	11.93100448
1101	am117	SHF	SHOVEL	1	1	1769.56	0.107269974	-0.025802496	0.073795195	0.005137002	-17.80292006
1102	am117	SHF	TRUMPET	1	0	1420.5683	0.080910157	0.163522468	-0.018957444	-0.011285055	-6.229844164
1103	am117	SHP	TOILET	1	1	2194.4536	0.160197344	0.069845721	0.123516265	0.070514133	-1.79307845
1104	am117	SHF	CRAB	1	1	1666.0973	-0.027580633	-0.050020477	0.102686663	0.047150849	-2.453099541
1105	am117	MF	STAR	0	0	1030.7874	0.100885304	0.107336818	0.001752363	0.018350667	0.032645387
1106	am117	IP	ARROW	0	1	3022.3742	0.096255331	0.01423606	0.024404122	0.024927987	6.569271467
1107	am117	IP	MOON	0	0	2920.2137	-0.053902478	-0.07114578	0.031870249	0.0198294	-2.682754434
1108	am117	IP	JELLY	0	0	2678.9758	0.055353066	0.098148205	0.017542438	0.013133174	9.336380366
1109	am117	IP	BRAIN	0	0	3546.2313	-0.138349895	0.068912702	0.041996788	0.024485921	15.570349
1110	am117	SMF	TOWEL	0	1	1461.7263	0.024977041	-0.052106875	0.015251427	0.004625038	-0.781534313
1111	am117	IF	FLAG	0	0	3338.3053	0.105631911	0.054089363	0.020284795	0.03063084	-1.962323214
1112	am117	SMF	CANDLE	0	0	1531.0809	0.075444475	-0.011392696	0.021319543	0.02387617	1.73197969
1113	am117	IF	BADGE	0	0	3272.2011	0.094123373	0.13065046	0.038855859	0.002638056	6.688759272
1114	am117	IF	ENVELOPE	0	1	2924.2876	0.107587473	-0.006947933	0.008195389	-0.002536977	-10.30610325
1115	am117	MF	LOCKER	0	0	1398.0018	-0.073637895	-0.004180452	-0.043472583	0.026264931	-9.535603057
1116	am117	IP	BASKET	0	0	2486.3273	0.164893391	0.023631074	0.001365932	0.030992109	6.908759299
1117	am117	MP	DEER	0	1	1154.2287	-0.098214602	-0.004220486	0.032169768	0.028570513	1.443676005
1118	am117	SMP	SYRUP	0	0	3742.5513	-0.010504804	0.026471695	0.020085248	0.033730274	-15.45846022
1119	am117	IP	PAN	0	1	2956.6223	0.319629606	0.14224158	-0.014747072	0.041012114	5.959589019
1120	am117	IF	CAKE	0	0	2757.4107	0.053932776	0.156289559	-0.046881944	-0.028965382	-11.36663693
1121	am117	IP	PARADE	0	1	2499.078	-0.003749844	-0.069518616	-0.001709902	0.016118317	-2.684113553
1122	am117	MP	APPLE	0	0	1119.1409	0.178134063	0.112483764	0.013277504	0.042995857	-36.6404346
1123	am117	IF	BELL	0	0	2597.1331	0.18173844	0.225305071	-0.011565617	0.005294829	-0.889307284
1124	am117	IP	TIGER	0	0	2955.5454	-0.010688952	0.097090551	0.009282169	0.053198405	13.71727709
1125	am117	IP	PILLOW	0	1	2426.6531	0.065416439	0.168183157	-0.015331005	-0.013063728	9.758582384
1126	am117	IP	BROOM	0	0	3300.559	0.019865244	-0.033438603	0.020393307	0.014166857	11.7376756
1127	am117	IF	SPOON	0	0	2108.3372	0.013708132	-0.008098882	0.021224834	0.033405783	16.94252269
1128	am117	IP	ROSE	0	0	2243.7396	0.219619074	-0.003527867	0.005810973	0.058985328	20.63569815
1129	am117	MP	COFFEE	0	0	1997.0595	0.025072944	-0.048624895	0.011475219	0.023752193	-14.49186323
1130	am117	IF	NEST	0	0	3122.5167	-0.045346897	-0.060104596	-0.023276114	0.036396471	15.12197874
1131	am117	MP	SOUP	0	0	2315.7523	0.087597218	0.061567489	0.005406532	-0.023450615	10.95590029
1132	am117	MP	BUTTER	0	0	1218.9832	-0.069281517	-0.059469894	0.015012985	0.020871155	-7.229647638
1133	am117	IP	CANOE	0	1	2749.3429	0.051895274	0.186965155	0.010479852	-0.016493661	-9.405667646
1134	am117	SMF	SEAL	0	1	2082.3507	0.065599402	-0.006792459	-0.010951615	0.00929285	-14.04244814
1135	am117	IP	MAP	0	0	3587.8899	-0.130002261	-0.022358695	-0.0141482	0.047424689	-26.25247952
1136	am117	IF	HIGHWAY	0	1	2353.3028	-0.087142468	-0.132598265	-0.012869834	0.009536019	-23.50890068
1137	am117	SMP	CHICKEN	0	0	2735.6567	-0.025442393	-0.02207424	-0.022219535	-0.011532422	-5.470214518
1138	am117	IP	WINE	0	1	3069.7146	0.009294376	-0.056906271	-0.007114254	0.055432418	22.45626624
1139	am117	IP	CROWN	0	0	2218.5128	0.037956192	-0.073423414	0.018890491	0.023170521	-5.211130046
1140	am117	MF	DESK	0	0	3228.953	-0.169561179	-0.061336627	0.060328893	0.01386721	-0.002916586
1141	am117	IF	BIBLE	0	0	3164.705	-0.213812448	-0.012072049	-0.052793505	-0.007235461	21.51536472
1142	am117	IF	KETTLE	0	0	2528.4145	-0.114621507	-0.105411371	0.025215928	0.036754689	-9.111263153
1143	am117	IP	MAGNET	0	0	2709.7422	-0.214204186	-0.047853845	0.003356522	0.043773199	-20.46690704
1144	am118	SHF	WINE	1	0	2898.014	0.111722214	0.063385949	0.032439026	0.011862584	10.5216444
1145	am118	SHF	BROOM	1	0	1886.8685	0.223343222	0.129543678	0.023551844	0.024844408	8.568217414
1146	am118	SHF	TIRE	1	0	2848.1903	-0.028550505	-0.070180588	-0.009263161	-0.012843857	14.34414266
1147	am118	SHP	ANCHOR	1	1	2289.7419	-0.098142573	-0.086237834	0.013842464	-0.010974105	34.00113175
1148	am118	SHF	PAIL	1	0	2947.367	0.236907421	0.07814246	-0.005647491	0.010165374	-4.334752678
1149	am118	SHF	ELEPHANT	1	0	3181.6135	0.031597184	-0.063962761	-0.030418856	0.000207829	19.26780563
1150	am118	SHF	KEG	1	0	1553.347	0.026757556	0.091247116	0.028867974	0.02863174	13.97762404
1151	am118	SHF	BRAIN	1	0	1883.1781	-0.082270937	-0.077133683	0.010612285	-0.002029294	8.863603244
1152	am118	SHP	DUCK	1	1	1900.3302	-0.303425087	-0.139094733	0.051930664	0.018807495	-7.559737257
1153	am118	SHF	TURTLE	1	1	1663.2243	-0.039364151	0.028072738	-0.010202515	5.06E-05	10.79854999
1154	am118	SHP	FLASK	1	1	2477.8755	-0.047328705	-0.018611206	0.030110719	0.029859337	-7.626024099
1155	am118	SHF	GOAT	1	1	2164.5166	0.078885836	-0.011504286	0.055895599	0.041496837	0.01320173
1156	am118	SHP	MAP	1	1	2558.4818	0.132790936	0.139571031	0.035274122	0.030701802	-2.665550211
1157	am118	SHF	KITTEN	1	0	2406.2026	-0.143644797	0.008278315	0.061354947	0.024569373	-11.20343139
1158	am118	SHP	FENCE	1	0	2176.0179	-0.054304826	-0.015939508	0.004129347	0.01671942	-11.80385518
1159	am118	SHF	SYRUP	1	0	1809.1479	-0.02736115	-0.049370086	0.065414448	0.03665459	14.48203418
1160	am118	SHP	LION	1	1	2282.3812	0.010437048	0.076217284	0.047207293	0.040701482	14.33689409
1161	am118	SHF	WALLET	1	0	2060.0416	-0.164737199	-0.072179226	-0.019866858	-0.016362323	31.40067137
1162	am118	SHF	MUG	1	0	2243.5528	0.088041585	0.050186989	0.005441358	0.002620491	-1.284874626
1163	am118	SHF	PARADE	1	0	1888.8856	0.397044143	0.01975868	0.011908369	0.014492427	14.98488198
1164	am118	SHP	LAMP	1	0	2042.8011	0.076481006	-0.111226617	0.04470072	0.023248426	4.281908964
1165	am118	SHP	HIGHWAY	1	1	2678.339	0.069839532	-0.005563066	0.052473313	0.033524816	-2.574519213
1166	am118	SHF	BACON	1	1	1847.2677	-0.056623041	-0.074332072	0.015114722	-0.020850226	13.53141555
1167	am118	SHF	BIBLE	1	0	1674.3298	-0.041453141	-0.008229524	0.001151452	0.025242632	13.23009207
1168	am118	SHP	SPONGE	1	1	2264.7266	0.063112579	0.109639354	0.024509255	0.034967904	3.472726022
1169	am118	SHF	HONEY	1	0	1914.7831	-0.145543293	-0.064268267	-0.020775386	-0.002921115	4.72555598
1170	am118	SHP	OTTER	1	1	2389.7184	0.129114227	-0.019528285	0.017535308	-0.001174107	23.65820868
1171	am118	SHF	TOILET	1	1	1509.7256	-0.022986863	-0.008143516	0.037597132	0.024553916	-7.101163411
1172	am118	SHF	UMBRELLA	1	1	2354.0622	0.151130755	0.110980958	0.050681838	0.034306669	19.32982587
1173	am118	SHF	NEEDLE	1	0	2006.0862	0.243763777	0.171631995	0.02297897	0.01651044	10.84791895
1174	am118	SHP	ENVELOPE	1	1	2667.7643	0.027914458	0.042029239	0.020475387	0.021933493	-1.604778045
1175	am118	SHF	STAR	1	0	2324.6747	0.139768217	0.12138279	0.019363307	-0.007629807	16.91225182
1176	am118	SHP	CLOCK	1	1	2565.5815	0.045534917	-0.016165095	0.006797007	-0.01913466	14.43675351
1177	am118	SHP	HOSE	1	0	3319.2427	0.060478895	-0.051998904	0.06025821	0.032573834	-1.96173998
1178	am118	SHF	ROSE	1	1	3047.6389	0.001221391	-0.069768822	-0.000844095	0.014846223	34.01570708
1179	am118	SHP	OMELET	1	1	2045.3961	0.050825218	-0.036882776	0.010609998	0.016869036	-12.91011448
1180	am118	SHP	CAPE	1	0	2023.8987	-0.105236835	0.120849437	0.031655747	0.022588693	13.70818363
1181	am118	SHF	SOAP	1	1	2131.3634	0.07609962	-0.019726817	0.034691559	0.009860138	25.92176513
1182	am118	SHF	BALLOON	1	0	1636.4282	-0.123963912	-0.099786295	-0.021580265	-0.029941225	4.791894462
1183	am118	SHP	STRING	1	0	1718.7973	0.092552177	0.13451259	0.040362914	0.023083649	13.9213134
1184	am118	SHF	PAN	1	0	2331.965	0.035022993	0.108486073	-0.007319818	0.018212393	4.753879028
1185	am118	SHF	PHONE	1	0	1881.5252	0.137020738	-0.043187859	0.041491114	0.042497894	-16.0909821
1186	am118	SHF	LADDER	1	0	2324.8893	-0.000510708	-0.062336075	0.01664918	0.058969864	2.60410552
1187	am118	SHP	MITTEN	1	0	1451.2782	-0.003704624	-0.027013111	0.036465132	0.044593243	7.884062055
1188	am118	SHP	LOCKER	1	1	2571.562	0.02181288	0.055507409	0.0196922	0.017242448	23.46098563
1189	am118	SHP	MUSTARD	1	1	2337.1287	-0.06972696	-0.078401301	0.012409177	0.009688817	0.544393965
1190	am118	SHF	BOWL	1	0	2663.5294	0.050778965	0.007900096	-0.00029306	-0.007313901	5.711928368
1191	am118	SHF	CRAB	1	1	1909.0964	0.082215472	0.032983475	-0.022389897	-0.004550606	-2.459511394
1192	am118	SHP	DIAMOND	1	1	1902.5827	0.059069177	0.016032085	0.059166193	0.042939851	11.87373125
1193	am118	SHF	PAINTBRUSH	1	0	1972.5464	-0.047813617	-0.031350233	-0.03566859	-0.033637965	5.364764991
1194	am118	SHP	FORK	1	0	3556.5788	0.124202711	0.018112488	0.043254981	0.010947308	-8.767992135
1195	am118	SHP	SOUP	1	0	3557.422	0.024401945	-0.037508225	0.015993019	-0.002284559	0.621853845
1196	am118	SHF	TRUMPET	1	1	2859.3749	-0.041087389	-0.091534137	0.054487667	0.057250834	-6.971396168
1197	am118	SHP	LIZARD	1	0	2645.4138	0.140049275	0.067655464	0.099063276	0.033923364	15.88802825
1198	am118	SHP	CANNON	1	1	2280.9603	-0.020488048	-0.066918925	0.051589552	0.014938634	23.24185358
1199	am118	SHF	GUITAR	1	0	1428.898	0.020907789	-0.030645889	-0.010830052	0.006058704	7.69683551
1200	am118	SHP	OYSTER	1	1	2508.2913	0.158708324	0.013260477	0.058371427	-0.010326393	18.5926767
1201	am118	SHF	NAPKIN	1	0	2292.75	-0.081582452	-0.004366909	-0.033825496	-0.037329136	8.113248795
1202	am118	SHF	NET	1	1	2771.961	-0.184505819	-0.070799248	-0.040040755	-0.041011691	24.04100921
1203	am118	SHF	JELLY	1	1	2430.6345	-0.023486968	-0.089771526	-0.037655773	-0.040919826	7.822706462
1204	am118	SHP	MONKEY	1	0	1577.8849	-0.256397787	-0.068927289	0.019537865	0.018961278	27.17845461
1205	am118	SHP	TROPHY	1	1	2538.1614	-0.013179671	0.002196245	0.017084177	0.00964697	17.36857086
1206	am118	SHF	RAILROAD	1	1	1786.751	-0.09126599	0.023688805	0.013534441	-0.003290814	5.337430984
1207	am118	SHF	ROCKET	1	0	1377.5875	0.015272984	-0.016942206	0.004319321	0.012478696	-2.272158495
1208	am118	SHF	POTATO	1	0	1809.3218	-0.078631961	-0.041350456	-0.006235495	0.006984078	15.49149123
1209	am118	SHP	CORN	1	1	3349.9051	-0.09581659	-0.013845739	0.057379764	0.000181851	5.312470183
1210	am118	SHP	MAGNET	1	1	1303.9977	-0.001996051	-0.003532592	-0.010380098	0.022613633	-0.504814038
1211	am118	SHF	TAXI	1	1	1856.5044	-0.197311407	-0.051111035	-0.033867293	0.004317302	-19.973066
1212	am118	SHP	OVEN	1	1	3400.5908	0.025810257	-0.025541652	0.01305246	0.017521485	13.59992022
1213	am118	SHP	CASTLE	1	1	1960.0519	-0.022429033	0.086638519	0.024031433	0.021976584	2.495687353
1214	am118	SHF	TRACTOR	1	0	2271.3246	-0.017818116	0.041342696	0.003948763	-0.012413492	-2.760968736
1215	am118	SHP	BADGE	1	1	2578.4935	0.056080339	0.011035692	-0.017172577	0.023144259	-18.59262732
1216	am118	SHP	PIGEON	1	1	1689.4808	0.090541617	0.011503796	0.031442996	0.016385944	0.436191652
1217	am118	SHF	PURSE	1	0	2253.2322	-0.037607166	-0.00171944	-0.007884337	-0.003250325	0.19119656
1218	am118	SHP	STAPLER	1	1	2251.2742	0.002577008	0.069892073	0.025132445	0.027871821	4.942792588
1219	am118	SHP	BOOT	1	0	1948.3734	0.136051043	0.047888556	0.05319981	0.011193266	4.608802874
1220	am118	IP	HAMMER	0	0	2776.8955	0.040350233	-0.029174412	-0.044393313	-0.004530942	1.239386714
1221	am118	SMP	BARREL	0	0	2469.5893	0.200631	0.071581607	-0.049384122	-0.008959651	7.588952793
1222	am118	SMP	CIGAR	0	1	2955.8732	-0.209721909	-0.021552604	0.015234579	0.014381987	12.41425991
1223	am118	MP	SOCK	0	0	1439.0321	-0.104999728	-0.05285504	-0.028549304	-0.002064965	-5.406515278
1224	am118	SMP	LIME	0	1	2214.6601	0.083597661	0.095118354	0.006851668	0.01429529	9.646276507
1225	am118	SMF	MOUSE	0	0	2613.7832	0.057728699	0.144044704	-0.015411486	0.006131045	2.960619836
1226	am118	MF	CARROT	0	0	1511.0797	-0.026405013	0.009847108	-0.036069437	0.020340104	0.408725464
1227	am118	MP	DOLL	0	1	1846.9353	-0.029897731	-0.057223742	0.038390072	0.01778295	1.093071954
1228	am118	MP	GLASSES	0	0	2654.2473	0.017028717	0.045499935	0.073872981	0.01211747	17.66894751
1229	am118	MF	CAKE	0	0	1700.9784	0.200358925	0.046078796	0.014437261	0.007049704	-11.43143207
1230	am118	SMF	HAM	0	0	2201.1793	0.023736065	-0.040600969	0.033951861	0.030088275	2.235054157
1231	am118	MP	SHOWER	0	0	1276.9541	-0.048219864	-0.057435795	0.085925666	0.017731094	-11.99327626
1232	am118	MP	CHERRY	0	0	2367.885	-0.067900186	0.005711332	-0.018506759	-0.041847543	-7.59170002
1233	am118	SMP	PILLOW	0	0	2635.21	-0.102965941	0.034233783	0.028628365	0.033230298	-12.65533594
1234	am118	MF	JACKET	0	0	2852.9939	0.086590901	0.167694642	-0.009709735	-0.000461921	-10.11158262
1235	am118	SMF	TOWEL	0	0	2617.4078	0.0726463	0.065534834	-0.029455616	0.028789747	24.25671015
1236	am118	SMP	WOLF	0	1	3078.1096	-0.011836861	-0.044113548	0.010450992	0.007407893	18.81327871
1237	am118	SMF	KETTLE	0	0	2224.9161	0.222006104	0.05305669	-0.012579561	0.027949408	14.07929747
1238	am118	IP	FAN	0	0	3279.3774	0.027556	0.108312288	-0.012572873	0.01919959	-3.939925915
1239	am118	IF	PENCIL	0	0	2529.0602	-0.177073038	-0.04915263	0.050596694	0.004022135	1.699479662
1240	am118	SMP	CAGE	0	0	2774.9722	0.0794284	0.021299049	0.012690331	0.011338214	31.73048141
1241	am118	MP	APPLE	0	0	3242.4678	-0.185059618	0.022405943	0.09187965	0.047897669	3.975962541
1242	am118	IP	MILK	0	1	2866.3151	-0.01740365	0.06857595	-0.05298589	-0.025166667	-3.171859448
1243	am118	SMF	BASKET	0	0	2736.384	0.211065997	0.029581472	-0.026451007	0.025563392	-3.974983349
1244	am118	MF	ORANGE	0	0	3213.0603	0.165334006	0.095642835	-0.035916236	0.018437217	7.495947413
1245	am118	MP	BONE	0	0	2387.3573	0.110575399	0.041044761	0.067109703	0.017336445	2.682279176
1246	am118	IF	STOOL	0	0	3377.5574	-0.004124749	-0.014705195	0.041803899	0.021422926	7.407749191
1247	am118	MF	BELL	0	0	3024.4634	-0.058742758	0.056102713	-0.003847555	0.018794545	9.095053948
1248	am118	SMF	MUFFIN	0	0	3275.8446	0.055240289	0.053902178	-0.03416467	-0.006548476	-0.836271969
1249	am118	MP	DRUM	0	0	3842.9603	-0.019457439	-0.093254871	-0.016984857	0.039316575	-0.093520486
1250	am118	MF	MOTH	0	0	2599.3576	0.067506339	0.036208447	0.005424489	-0.005931508	-10.92013423
1251	am118	MF	FLAG	0	0	3704.5756	-0.029684023	0.029322231	-0.025281712	0.035968048	2.067686585
1252	am118	MF	SEAL	0	0	2419.654	-0.05270341	-0.022412227	0.009286323	0.022888334	-0.323452615
1253	am118	SMF	BANANA	0	0	3275.8228	0.178563296	0.046153351	-0.000471513	0.001852933	-8.372967399
1254	am118	IF	HOOK	0	0	2568.2035	-0.05118807	0.022574297	0.054845112	0.032874343	25.30856665
1255	am118	SMP	CANDLE	0	1	3040.2085	-0.091352287	-0.036925553	-0.055094186	-0.030013372	21.10742838
1256	am121	SHF	ENVELOPE	1	1	3773.8381	-0.218516885	-0.003688044	0.005204056	0.027101968	6.260242029
1257	am121	SHP	PARADE	1	0	2498.8153	0.178432619	0.106043288	0.012411074	0.014572347	15.56251888
1258	am121	SHP	PENCIL	1	0	1688.7078	0.42829423	0.106854751	0.031622259	0.047793883	4.802316117
1259	am121	SHF	ELEPHANT	1	1	3456.6361	0.054237751	0.005990117	-0.003662319	0.007290934	16.29247945
1260	am121	SHF	HAMMER	1	1	2445.5098	0.128890588	-0.006343868	-0.002023952	0.014178651	-4.052196533
1261	am121	SHF	DEER	1	1	3484.6923	-0.505325415	-0.116559613	0.024031369	0.016527688	9.956283154
1262	am121	SHF	DOLL	1	0	2397.0227	-0.036083615	0.038469936	0.015687098	0.006679502	2.804302477
1263	am121	SHF	BASKET	1	0	2919.5934	0.337487369	0.285756461	-0.003141866	0.019510949	-13.10373668
1264	am121	SHF	CANDLE	1	0	3320.3567	0.009534609	0.09626952	-0.029124598	0.019493363	13.24119538
1265	am121	SHP	TRAY	1	0	2569.0083	-0.07519275	0.147126754	0.021298065	0.0458039	19.48156541
1266	am121	SHF	LIZARD	1	1	1478.5735	0.076995076	0.183405376	-0.003143973	0.042623825	-0.180710709
1267	am121	SHF	SPOON	1	0	2162.7697	0.031836914	0.054618001	-0.000515895	0.012261483	1.922714853
1268	am121	SHF	JELLY	1	0	3071.948	-0.102878058	-0.043184205	0.008701092	0.026884103	5.495333961
1269	am121	SHP	QUILT	1	0	2552.927	0.105025432	0.09651539	0.01388272	0.033387665	1.108954031
1270	am121	SHF	BELL	1	0	2218.2085	-0.071714295	0.001371653	0.021501718	0.02972379	14.79615859
1271	am121	SHF	CANOE	1	1	2310.2464	-0.05356057	-0.0232462	0.000839051	0.011722566	12.88690699
1272	am121	SHP	MILK	1	0	3681.713	-0.006029423	0.00819175	0.013295365	0.028271503	11.38312867
1273	am121	SHF	MONKEY	1	1	3903.5329	-2.65E-05	0.084346549	0.000440699	0.029301848	0.588052499
1274	am121	SHF	PIE	1	1	3016.069	0.119636382	0.044336474	0.026952166	0.049993981	11.93146979
1275	am121	SHP	ARROW	1	0	3120.1131	0.205031784	0.128558223	-0.003787347	0.015469043	17.56804305
1276	am121	SHP	SPONGE	1	0	4702.6311	0.149098625	0.087580274	0.00829172	0.037666981	-8.448607573
1277	am121	SHF	SOAP	1	0	1598.2287	0.042340496	0.020116971	-0.010710594	0.015323066	11.20918095
1278	am121	SHF	CAGE	1	0	2583.3036	0.075560853	0.097657306	0.003416263	0.008717221	-1.263452317
1279	am121	SHF	UMBRELLA	1	0	1645.5667	0.077005977	0.008983369	0.009120035	0.02491003	-8.882615712
1280	am121	SHF	KEG	1	1	2349.0573	-0.299525681	-0.008189381	0.007658788	0.004822238	13.05406787
1281	am121	SHF	RAILROAD	1	1	2106.5296	-0.255703682	-0.11437676	0.023260763	0.022217859	22.94742197
1282	am121	SHP	TOILET	1	0	3089.6589	-0.421631886	-0.106146817	-0.000126691	0.009447715	23.05471971
1283	am121	SHP	PLATE	1	0	2500.6657	-0.140849305	0.065481071	0.019378858	0.035796458	4.283782669
1284	am121	SHP	CHEESE	1	1	1783.5267	0.279480442	-0.030913183	0.008473951	0.027488854	15.02993906
1285	am121	SHF	STAPLER	1	1	2170.3422	-0.247787874	-0.05912917	-0.006311308	0.012978776	5.318003653
1286	am121	SHP	SHEEP	1	0	2441.9942	-0.468040412	-0.0380688	0.074131289	0.044618869	6.133140494
1287	am121	SHF	STRING	1	0	3379.6047	0.276859218	0.07291999	0.00803185	0.03571071	3.566855999
1288	am121	SHF	MUG	1	1	2326.8287	-0.366850003	-0.064783463	0.02645415	0.03875404	-0.370877586
1289	am121	SHF	CHERRY	1	0	1289.96	0.081298934	0.155873512	0.01219978	0.05316345	-5.201946601
1290	am121	SHP	TAXI	1	0	3454.0005	-0.204215016	0.002776682	0.046617239	0.051806628	-1.63882591
1291	am121	SHF	RABBIT	1	0	3362.3592	0.231408031	0.302165745	0.024230842	0.058457087	7.223222786
1292	am121	SHF	SCISSORS	1	0	1590.4472	-0.253540449	-0.021871747	0.005051506	0.027715055	-1.597780317
1293	am121	SHP	DESK	1	0	1884.5273	-0.382250858	-0.126726997	-0.031876264	0.027774987	-3.007286687
1294	am121	SHF	KETTLE	1	0	1901.685	0.200879995	-0.057767743	-0.010719919	0.004605419	-6.15931838
1295	am121	SHF	MUFFIN	1	0	1381.3068	0.309665896	0.069273875	0.001919524	0.026267036	14.16623918
1296	am121	SHP	NET	1	0	1443.0931	0.455344107	0.157373213	0.017984592	0.032073836	4.77154433
1297	am121	SHF	BUTTER	1	0	1548.2121	0.280036742	0.009595966	-0.005760471	0.016439566	6.133512462
1298	am121	SHF	LADDER	1	0	1459.0852	0.317689366	0.198547209	0.004819205	0.038757383	7.048017984
1299	am121	SHP	MOUSE	1	1	3156.8983	-0.108353386	-0.052415542	0.02281583	0.039858075	26.45682268
1300	am121	SHP	FAN	1	0	2691.736	-0.00851921	0.102235318	0.017653098	0.032444481	19.07830968
1301	am121	SHF	KITTEN	1	0	2399.9895	0.178296007	0.083470937	0.00978529	0.014266602	10.03400723
1302	am121	SHF	HIGHWAY	1	0	2880.7601	-0.068100323	0.036617316	0.027138668	0.022654963	12.95842681
1303	am121	SHF	ANCHOR	1	1	1848.9293	0.077925854	0.06181083	0.00423255	0.005853449	-0.476529814
1304	am121	SHP	CAPE	1	0	2036.646	-0.058837366	0.021731618	-0.013582933	-0.000101879	0.683763053
1305	am121	SHP	TIGER	1	0	2077.572	0.176616119	0.024931614	-0.01882057	-0.009060721	-1.527430398
1306	am121	SHF	SOCK	1	1	3095.1603	0.132560405	0.1074427	-0.013914542	0.004645884	22.34591277
1307	am121	SHF	CASTLE	1	0	3382.0389	0.100440487	0.082436058	-0.002260858	0.022040871	14.07101811
1308	am121	SHP	BENCH	1	0	1128.4054	-0.355599998	0.068622416	0.043400433	0.057234563	-2.599392564
1309	am121	SHP	TIRE	1	0	1317.0318	0.092343035	-0.028534007	-0.00228005	0.05189088	3.526524998
1310	am121	SHF	GOAT	1	0	3362.8072	-0.062324027	0.028817278	0.026464054	0.031987716	5.611283602
1311	am121	SHP	HOOK	1	0	1418.0359	-0.244726657	0.106413614	-0.004343829	0.037747206	8.335591779
1312	am121	SHF	ROCKET	1	0	3175.0955	0.036527722	-0.060462924	0.014200024	0.01600209	9.733668221
1313	am121	SHF	TOWEL	1	0	1710.7083	0.055890218	0.018752208	-0.002169693	0.003109681	0.764412932
1314	am121	SHP	MAGNET	1	0	1513.0114	0.086034278	0.089506281	0.026347169	-0.006645451	12.23614594
1315	am121	SHF	FLAG	1	0	1488.479	-0.046607282	0.041722495	0.007028556	0.00920666	-0.583622077
1316	am121	SHF	NEST	1	0	1662.4307	-0.141517343	0.100806584	0.031113289	0.028479304	-7.40987139
1317	am121	SHP	TRUMPET	1	0	1893.6893	0.23094087	0.136881983	0.011755299	0.021966675	5.407847208
1318	am121	SHF	DIAMOND	1	0	1902.2723	-0.05917106	0.021314737	0.016457289	0.019986072	6.825166839
1319	am121	SHP	CRAB	1	0	3842.7232	0.085790797	-0.130877485	0.010120969	0.020037855	2.065096404
1320	am121	SHP	CROWN	1	0	2083.8541	0.016063493	-0.007032681	0.013282006	0.008204234	-3.210405683
1321	am121	SHF	BACON	1	0	3178.9213	0.163313724	0.053727543	0.005185858	0.021556709	10.89062619
1322	am121	SHF	SOUP	1	0	3967.6128	0.038980712	-0.097389516	0.059761319	0.018718454	-9.529367563
1323	am121	SHP	DRUM	1	0	2285.861	-0.365730614	-0.150024025	-0.008133224	0.0174167	14.48543901
1324	am121	SHF	SHOWER	1	0	1764.3883	-0.177976798	-0.063984488	0.040603927	0.034436956	4.949759482
1325	am121	SHP	PILLOW	1	0	1763.2131	-0.22998889	-0.070840221	-0.023179142	0.024560722	23.18253679
1326	am121	SHF	WOLF	1	0	1477.4596	0.166477835	0.060400076	0.014880233	0.026703739	-7.064719818
1327	am121	SHP	CAKE	1	0	3191.7216	0.100343207	0.058198308	0.01108672	0.023978909	6.834561068
1328	am121	SHF	OVEN	1	0	1676.8583	-0.171584241	0.102670733	0.033706001	0.05722483	-0.844921914
1329	am121	SHP	FORK	1	0	1995.4563	0.046251662	0.162515636	0.046665198	0.016745229	15.00886059
1330	am121	SHP	OMELET	1	0	3200.5152	0.326612299	0.123074183	0.053262909	0.011257378	13.43074243
1331	am121	SHP	SYRUP	1	0	2277.4319	-0.222747166	0.015128452	0.033160522	0.019615909	9.071119234
1332	am121	SHF	BARREL	1	0	1598.6252	0.165176833	-0.030790982	0.001834441	0.004825639	14.60702207
1333	am121	SHP	PIGEON	1	0	1825.0707	-0.051907166	-0.051157745	0.02030557	0.045181557	6.037928661
1334	am121	SHF	CHICKEN	1	0	1359.1007	-0.079042727	-0.037188251	0.007096595	0.034141157	-28.6677294
1335	am121	SHF	HAM	1	0	3033.2855	0.135011925	0.061529933	0.015244538	0.02869692	-2.139570539
1336	am121	SHF	GUITAR	1	0	1968.0556	0.012637823	0.04767008	0.013043176	0.03815092	20.04817897
1337	am121	SHP	MOTH	1	0	1519.4802	0.023850691	-0.050449235	0.007926667	0.020814768	21.25650818
1338	am121	SMP	HOSE	0	0	4181.978	0.153691056	0.072924762	-0.00722768	0.021284182	1.15898436
1339	am121	SMP	ROSE	0	1	2146.696	0.315492267	-0.01430695	-0.025461907	0.017506633	24.32247444
1340	am121	MF	OTTER	0	0	2330.7484	-0.010974645	0.02065623	-0.052445088	0.016972522	1.856716038
1341	am121	SMP	MUSTARD	0	1	3280.765	0.122192503	0.112986948	0.040328702	0.04264215	-6.35176523
1342	am121	MP	POTATO	0	1	1895.4912	0.110378697	0.091042656	0.016372202	0.017650088	-4.6007711
1343	am121	SMP	MITTEN	0	0	3425.527	0.19841896	0.021512818	-0.000938094	0.018730127	3.904450132
1344	am121	SMP	TROPHY	0	0	3787.9678	0.258585531	0.117986191	-0.046746363	0.014002138	21.16068499
1345	am121	MF	APPLE	0	0	3873.4997	-0.41692399	-0.069366823	0.055036746	0.018237878	6.967315315
1346	am121	MF	DUCK	0	0	2091.9884	0.270922036	0.045853182	-0.015354506	-0.015005051	28.65588351
1347	am121	SMP	TOAST	0	0	3403.7468	-0.262227625	-0.024246533	0.014493595	0.051273198	13.10069872
1348	am121	SMP	CRADLE	0	0	3529.5365	-0.174447749	0.049468855	0.047713299	0.031300213	-7.199788409
1349	am121	SMP	PAINTBRUSH	0	0	4723.0838	0.083337177	0.081051425	0.002864125	0.049512045	10.12297095
1350	am121	SMP	STAR	0	0	2042.8038	-0.162039422	-0.00295957	0.071511166	0.087019173	-2.866560466
1351	am121	MP	HONEY	0	0	2354.6416	0.149363213	0.093001012	-0.053893427	0.059422662	3.452792218
1352	am121	IF	DOLLAR	0	0	4320.1859	0.081530427	0.068753832	-0.004372097	0.062794644	-3.395578568
1353	am121	IP	PURSE	0	0	4083.5189	0.015973167	-0.022953721	-0.024090431	0.034843158	-0.815283979
1354	am121	IP	COUCH	0	1	4825.7659	0.09956191	0.121690381	0.049324911	0.070870488	4.35126487
1355	am121	MF	BADGE	0	0	2119.851	-0.177598274	-0.045442038	-0.063563075	0.022662226	-11.59821894
1356	am121	MF	SEAL	0	0	3520.3831	0.170977653	0.125976805	0.029547536	0.031409385	-5.476980235
1357	am121	MF	CAMERA	0	0	3862.5815	0.006952429	-0.033834407	-0.008316636	0.016490672	0.700412535
1358	am121	IP	BRAIN	0	0	4011.851	0.069603437	0.046846173	-0.00602655	0.023001103	-15.29465141
1359	am121	IF	ROPE	0	0	4291.2588	-0.150456026	-0.026078945	0.014518178	0.016022913	-37.9851144
1360	am121	SMP	TRACTOR	0	0	4256.4729	-0.491769248	-0.067025	0.069077695	0.046635306	8.038377995
1361	am121	SMP	NAPKIN	0	0	3274.8361	0.071416586	0.061702316	0.009960454	-0.002583367	4.756631305
1362	am121	MP	CANE	0	0	4403.9597	-0.070481083	0.142801285	0.000340089	0.082877676	-15.94824805
1363	am121	MP	CIGAR	0	0	2236.3979	-0.222253689	0.032001466	-0.006917596	0.00242224	14.70448026
1364	am121	SMP	CLOCK	0	0	1960.0948	-0.199316974	0.203625361	-0.001948498	0.000412391	-22.81110838
1365	am121	SMP	SHOVEL	0	1	2774.9952	-0.253105282	0.102731274	-0.011846977	0.03778975	0.364213333
1366	am121	MF	PHONE	0	0	3799.6545	-0.131514778	0.047357499	0.022316425	0.010738226	-1.52535771
1367	am122	SHP	MUFFIN	1	1	2548.5312	0.078141902	0.104850478	0.025565388	0.023446864	7.212501217
1368	am122	SHF	ANCHOR	1	0	2488.4256	0.230179479	0.023453084	0.03498622	0.031681819	19.31834872
1369	am122	SHF	PAN	1	0	3084.3929	-0.050812388	-0.05842667	-0.004225728	0.001989833	22.92600255
1370	am122	SHP	OTTER	1	0	3365.2967	0.1940398	0.15701009	0.067303839	0.052637917	10.9196712
1371	am122	SHF	PENCIL	1	0	3383.4485	-0.028509	-0.063909205	0.040060186	0.031528615	23.17779399
1372	am122	SHF	ARROW	1	0	3110.9193	0.095063347	0.068573077	0.025299105	0.016921115	-26.13101619
1373	am122	SHF	DEER	1	0	2158.6973	-0.152654644	0.001837001	-0.053875634	0.022024897	9.672131976
1374	am122	SHP	STRING	1	0	2537.7026	0.151441082	0.106103527	0.033169499	0.034258371	-3.391894557
1375	am122	SHF	CRAB	1	0	2731.8305	0.012252432	0.070622184	0.037209126	0.050372225	-10.21003685
1376	am122	SHP	CHEESE	1	1	2711.4071	-0.096541948	-0.014481765	0.029869768	0.016971021	10.64768775
1377	am122	SHF	WOLF	1	0	2546.616	-0.066351267	0.025567787	0.063817611	0.048559942	0.629189535
1378	am122	SHP	KEG	1	1	1552.8018	-0.080416752	0.01331528	0.049635087	0.019632444	-19.25132957
1379	am122	SHP	TOAST	1	0	2906.1763	0.037864753	0.014644302	0.055184252	0.04285971	16.37885888
1380	am122	SHP	NEST	1	1	3448.6097	0.120735529	0.055503092	0.07508058	0.052176481	15.32169016
1381	am122	SHP	CANOE	1	0	3084.2938	0.194702259	0.140577195	0.062231057	0.065978439	-1.642990442
1382	am122	SHP	BROOM	1	0	3882.3424	0.097584184	-0.056902697	0.035608359	0.046137774	14.23736638
1383	am122	SHF	DIAMOND	1	1	1658.9448	0.171653495	0.107715654	0.0089802	0.043897204	10.96543176
1384	am122	SHF	MANURE	1	1	2739.2848	0.024330939	0.015982574	0.045323087	0.04642207	2.475772828
1385	am122	SHF	OYSTER	1	0	3143.718	-0.01704975	0.092404982	-0.012895302	0.031226553	19.96271701
1386	am122	SHP	CARROT	1	1	3340.1187	0.226377727	0.117487427	0.069984242	0.053288227	22.74397793
1387	am122	SHF	CRADLE	1	0	3469.9438	0.039199182	0.028963797	0.002291262	0.042473754	2.623571277
1388	am122	SHF	MAP	1	1	2644.1083	0.070940296	-0.037526164	0.052188905	0.014786097	11.06792227
1389	am122	SHF	PURSE	1	1	1899.018	0.167351369	0.09834628	-0.004274174	0.043245094	4.254709532
1390	am122	SHP	COUCH	1	1	2376.3978	0.110991094	0.051928876	0.10642536	0.055800802	8.626546315
1391	am122	SHF	NEEDLE	1	1	1901.7087	0.271587471	0.116897623	0.050673698	0.015755638	5.880821798
1392	am122	SHF	STAPLER	1	1	2391.8383	0.088535161	0.037204237	-0.006963948	0.002404841	19.15732555
1393	am122	SHP	TURTLE	1	1	1999.9535	0.066455484	0.128089811	0.078246091	0.036871586	8.387481857
1394	am122	SHF	WINE	1	1	2279.5558	0.056724413	-0.059655016	0.002401846	-0.004016532	12.08180032
1395	am122	SHF	WHIP	1	0	1623.2618	-0.064092648	-0.021240104	0.053881747	0.023598013	-12.08250296
1396	am122	SHP	CANE	1	1	2135.5873	0.107255497	0.087196752	0.069917031	0.024897118	-9.081460142
1397	am122	SHF	PAINTBRUSH	1	0	3250.0751	0.042428039	0.129652945	0.005128308	0.025558113	-2.291208498
1398	am122	SHP	BELL	1	1	2531.4923	-0.024590975	-0.03780248	0.077435489	0.043739198	17.73156941
1399	am122	SHF	SWORD	1	0	3407.1145	0.237868232	0.243190565	-0.007920874	0.015942343	6.337211685
1400	am122	SHP	LION	1	1	2950.9907	0.230744711	0.137735438	0.00700843	0.027967235	-3.428676093
1401	am122	SHP	LAMP	1	1	1804.1098	-0.180900403	-0.112267406	0.016287174	0.041081026	13.86201306
1402	am122	SHF	BIBLE	1	1	2470.8695	0.179917204	0.152599106	0.055954635	0.035559778	-6.896581206
1403	am122	SHF	NET	1	1	2603.6481	0.015072583	0.005270479	-0.013966245	0.070505505	1.658460206
1404	am122	SHP	ELEPHANT	1	1	1383.8859	-0.027580044	-0.006610532	0.03357762	0.03550809	13.98679555
1405	am122	SHF	MUG	1	1	2159.2267	0.16237883	0.104895148	0.063879863	0.057931354	14.24191827
1406	am122	SHP	SPONGE	1	1	2689.9005	0.196879384	0.125107097	0.048582094	0.018855228	2.621102746
1407	am122	SHF	CAMERA	1	1	3257.3081	0.072367409	0.210975545	0.033773598	-0.012953786	15.72523631
1408	am122	SHP	CAKE	1	1	2301.968	0.073380746	-0.1054846	0.055032123	0.049910992	-25.37985398
1409	am122	SHP	PLATE	1	0	3180.7959	-0.082338607	0.028408475	0.016235649	0.00982494	13.90000662
1410	am122	SHF	PIANO	1	1	3354.0214	0.054710188	0.068605885	0.081227803	0.03318987	21.52210118
1411	am122	SHP	BOWL	1	0	1824.58	-0.05674131	0.090347369	0.036550935	0.025606217	-12.82288623
1412	am122	SHF	CEREAL	1	1	2211.5866	-0.219073452	-0.029574563	0.012338404	0.031525023	14.6695055
1413	am122	SHP	PILLOW	1	1	2795.8911	0.14926177	0.120943714	0.089413103	0.05349666	1.158503566
1414	am122	SHF	HONEY	1	0	2109.5063	0.199041329	-0.021224814	0.038884872	0.020127822	10.94853927
1415	am122	SHP	LIZARD	1	1	2756.8725	0.018424521	0.146674533	0.044964563	0.045864669	1.72121827
1416	am122	SHF	BALLOON	1	0	2391.5524	0.039663684	0.04667048	0.000673128	0.058440013	0.671406742
1417	am122	SHF	MONKEY	1	1	2534.8429	0.008656433	0.033116287	0.025122703	0.008869139	0.54775583
1418	am122	SHP	KETTLE	1	1	3485.4092	0.172871468	-0.035929025	0.055492271	0.000687158	25.0314907
1419	am122	SHF	HIGHWAY	1	0	4055.683	0.059396933	0.071403581	0.067969775	0.037104412	13.94721283
1420	am122	SHF	MOTH	1	1	1951.4482	0.116336332	0.018951945	0.013296242	0.015844891	11.41877195
1421	am122	SHP	CASTLE	1	1	3359.9069	0.057248032	-0.007958043	0.048678482	0.020066107	-0.103760866
1422	am122	SHF	SCISSORS	1	1	1710.9083	-0.02728083	0.167959712	0.034109201	0.035342607	-2.160494826
1423	am122	SHP	PIGEON	1	1	2548.888	0.09824843	0.028176948	0.042621015	0.028735213	-3.93298051
1424	am122	SHP	MITTEN	1	1	3968.3269	-0.07405567	-0.081249334	0.025713408	0.055517892	11.93956297
1425	am122	SHP	MOUSE	1	1	2234.9141	-0.026995543	0.107666113	0.056488387	0.038612811	-12.1983842
1426	am122	SHF	ROSE	1	1	1338.2305	-0.063017477	0.019650265	0.016415379	0.056343678	-12.78820418
1427	am122	SHP	TROPHY	1	0	3959.0373	0.208128741	0.017856007	0.034749447	0.023802209	-13.56763686
1428	am122	SHF	SOUP	1	0	3174.6934	0.113884081	-0.050690584	0.021561765	0.027145367	-13.45290688
1429	am122	SHP	PARADE	1	0	2423.0804	0.001704359	0.080934058	0.077215221	0.055816206	27.49876401
1430	am122	SHF	RABBIT	1	1	2069.6	0.094372008	0.059604886	0.007422706	0.021874118	12.81483832
1431	am122	SHP	GOAT	1	1	3250.5121	0.167935162	0.03309086	0.02568291	0.047053594	3.71588276
1432	am122	SHP	JELLY	1	1	1878.1462	-0.011068659	-0.027546361	0.06869888	0.060239082	15.41120678
1433	am122	SHF	TAXI	1	1	1570.5743	-0.064663987	0.058877112	0.04595279	0.045298936	17.63295415
1434	am122	SHF	ORANGE	1	0	2682.9094	-0.24713285	-0.222216019	-0.006613316	0.023750909	16.15077722
1435	am122	SHP	CIGAR	1	1	1849.2321	0.041078067	0.066386591	0.009677497	0.016880917	-9.343731327
1436	am122	SHF	MAGNET	1	1	2020.4667	-0.205587794	-0.173181465	-0.03661514	0.019730191	29.22769844
1437	am122	SHF	RAILROAD	1	1	3473.2815	0.169957721	0.023621506	0.054685546	-0.011073781	-12.47048627
1438	am122	SHF	MUSTARD	1	1	1822.6276	0.15756841	0.068467469	0.048983848	0.03515191	25.07886281
1439	am122	SHP	BARREL	1	0	3138.9266	-0.01320893	-0.025979587	0.077757645	0.04168772	-24.212329
1440	am122	SHP	OMELET	1	1	2121.5777	-0.05230036	-0.015678406	0.071533894	0.012853768	11.20258448
1441	am122	SHF	HOOK	1	1	1971.6527	-0.174663432	0.102445593	0.025847083	0.039753402	5.182608839
1442	am122	SHP	POTATO	1	1	1806.772	-0.074868762	0.155370426	0.015169501	0.024019898	22.07401163
1443	am122	SHF	FORK	1	0	3245.0451	-0.011525851	0.074677789	0.038959836	0.014344808	-24.42222913
1444	am122	SHP	LIME	1	1	2239.4284	0.059615178	0.082872956	-0.02600377	0.037372993	20.78697992
1445	am122	SHP	PYTHON	1	0	1361.8174	-0.033547712	0.021398104	0.039259912	0.037814004	-22.26395586
1446	am122	SHF	MILK	1	1	1923.0583	0.082284786	0.035879528	0.037584078	0.041966419	-19.9651925
1447	am122	SHF	SPOON	1	0	2007.5893	0.030047623	0.013555884	-0.009751761	0.049112381	19.82807322
1448	am122	SHP	TRACTOR	1	1	1507.4998	0.038427663	0.068872421	0.098634262	0.036681048	-2.30534284
1449	am122	SHP	DESK	1	1	1645.0874	-0.082772849	-0.180011913	-0.001750327	-0.02562463	16.00268929
1450	am122	IP	STOOL	0	0	2940.457	-0.097456581	-0.129514307	-0.010430432	0.020330392	0.568742025
1451	am122	SMP	CANDLE	0	0	3402.8541	-0.021845592	0.03670597	0.004198712	0.007590213	2.87792948
1452	am122	SMP	BACON	0	0	3147.5019	0.075954256	0.069961842	-0.016685739	0.015216172	-9.289003365
1453	am122	IF	SHOVEL	0	0	3185.3118	-0.034567401	0.039731023	-0.007954981	0.022964384	5.25583749
1454	am122	MF	SHOWER	0	0	2788.7771	0.079447132	0.086239675	0.027129516	0.020097998	31.49649147
1455	am122	MP	KNIFE	0	0	2284.4064	-0.133152476	-0.054930456	-0.030587293	0.001912785	17.04545798
1456	am122	MP	APPLE	0	0	3509.8526	0.040221665	0.044999899	0.062271555	0.040426887	11.72207446
1457	am122	SMF	SOAP	0	0	2829.381	0.137104026	0.073632514	0.020684835	0.019330266	18.12857321
1458	am122	MP	JACKET	0	0	1992.6101	-0.121688927	0.009133994	0.050665348	0.020068641	25.16485523
1459	am122	SMF	TOILET	0	0	3026.5164	-0.069826846	0.017597935	0.001403243	0.002765883	-11.17628172
1460	am122	SMF	BENCH	0	0	3280.9775	-0.049718944	-0.095690655	0.037628258	0.052404029	14.53044482
1461	am122	MP	GLASSES	0	0	2929.4622	-0.012073893	0.066780486	0.001386702	0.007725557	-12.28888045
1462	am122	IP	TRUMPET	0	0	2517.958	-0.188761073	-0.011149792	-0.042295099	0.018018244	-3.789433859
1463	am122	SMP	CHICKEN	0	0	1888.2432	-0.146403111	-0.033098814	0.019286437	0.027851755	-9.626316452
1464	am122	SMP	COFFEE	0	0	3120.7352	0.034303551	-0.003078894	-0.006127223	0.030997097	11.85065045
1465	am122	IP	TOWEL	0	0	3296.0838	-0.108502185	-0.269881735	-0.010772724	0.028556207	-23.08525606
1466	am122	MP	DRUM	0	1	3362.4529	-0.055620303	0.065768597	-0.013137676	0.020399446	20.41766348
1467	am122	MF	OVEN	0	0	2326.3479	0.020880891	-0.158920698	-0.022826856	-0.02120797	2.826158103
1468	am122	MF	HAM	0	1	2681.327	-0.076358206	-0.080586502	-0.016273992	-0.0213236	-5.047579847
1469	am122	SMF	SEAL	0	0	3641.1026	-0.009935419	-0.01572626	-0.000405108	0.038429651	13.15374244
1470	am122	SMP	CROWN	0	0	3239.4784	0.129794982	0.026344586	0.005242671	-0.002820528	18.95033944
1471	am122	MP	CANNON	0	1	2745.9283	0.074681128	0.148827744	0.003760694	0.016921224	4.060548689
1472	am122	MF	FLASK	0	0	2805.8729	0.096359238	0.162912583	0.013153612	0.03681073	-7.944564753
1473	am122	SMF	TIGER	0	1	3062.0626	0.115474944	-0.068004312	-0.020953829	0.004464654	8.994712001
1474	am122	IP	TIRE	0	0	3958.1824	-0.065948006	-0.018762463	0.001472373	0.001400359	-7.182910555
1475	am122	SMP	FLAG	0	0	3494.5851	-0.054017276	0.031118167	-0.068396461	-0.010356693	29.19814985
1476	am122	MF	LOCKER	0	0	2826.3502	0.137526102	0.04239651	0.021762328	-0.013226326	-7.497934469
1477	am122	IP	BASKET	0	0	4312.0344	-0.035819529	-0.054288754	-0.045078033	0.016249967	0.742069439
1478	am122	SMF	ENVELOPE	0	1	4128.0279	-0.14201554	0.145156563	0.04989897	-0.032020286	-0.306033785
1479	am122	IP	PIE	0	0	3325.2584	-0.020825543	0.025645828	-0.009609045	-0.015781231	-21.39651998
1480	am122	MF	NAPKIN	0	1	3184.1495	-0.067454186	-0.065885485	-0.033643092	-0.039266846	-27.14585935
1481	am122	IP	HAMMER	0	1	3852.0537	0.254214579	0.046563471	0.009856801	0.035585815	14.11640616
1482	am122	IF	CORN	0	1	3507.6307	0.022357291	0.050664831	0.036981565	0.03373225	-6.214558881
1483	am122	MF	BRAIN	0	1	3301.255	0.127470679	0.025617259	-0.019837556	0.033758124	-7.924453843
1484	am122	SMP	SYRUP	0	0	2940.9081	-0.032588295	-0.062890298	-0.040197242	-0.002925433	-31.24262512
1485	am124	SHP	DRUM	1	0	3276.7158	-0.008195017	-0.08460897	0.085339497	0.041948873	1.531157338
1486	am124	SHP	RABBIT	1	0	3218.6819	-0.03359557	-0.135148587	0.125722616	0.028280767	-1.399303992
1487	am124	SHF	HAM	1	0	2703.5302	0.169574756	0.156958166	0.014270913	-0.014289149	-17.9054424
1488	am124	SHF	MUG	1	0	2921.9205	0.036940336	0.039729703	0.004469025	0.032711657	-11.4760932
1489	am124	SHP	PAINTBRUSH	1	0	3212.6277	0.222812549	0.059759297	0.105315382	0.002779645	8.200451065
1490	am124	SHF	SWORD	1	0	1653.2949	-0.025758414	-0.070231367	-0.001721277	-0.000611297	11.24395773
1491	am124	SHP	RAILROAD	1	1	2509.9693	-0.150885647	-0.048297591	0.062541337	-0.000961981	17.79076362
1492	am124	SHF	ANCHOR	1	0	2387.6236	0.026962079	-0.02460295	0.03237016	-0.001672823	3.022027291
1493	am124	SHF	ROSE	1	0	2593.8815	-0.121684048	-0.091616423	0.067666681	0.013198161	3.83121223
1494	am124	SHP	DEER	1	0	2472.8555	0.345677445	0.341598261	0.112758175	0.068534741	32.39134622
1495	am124	SHP	OYSTER	1	0	2966.7978	0.019175249	-0.039902476	0.037269658	-0.007273994	6.970117913
1496	am124	SHF	LIZARD	1	1	2549.1933	0.00679454	-0.06745091	0.08048152	0.016306259	-12.392743
1497	am124	SHP	SHEEP	1	0	3301.3849	0.07066106	-0.024718583	0.126922532	-0.012477402	-10.54074307
1498	am124	SHF	NEST	1	0	1642.827	0.075184651	0.182826332	0.061643315	0.00790973	11.36204499
1499	am124	SHF	SOUP	1	0	3072.1802	-0.181765048	-0.008456683	0.032981774	0.017867793	25.00238191
1500	am124	SHF	HOSE	1	0	1776.3425	0.024747376	0.000718317	0.061290296	0.016227092	6.46189891
1501	am124	SHF	PIANO	1	0	3243.1142	0.150540609	-0.011268824	0.053745551	0.025882686	-11.99428232
1502	am124	SHF	CANDLE	1	0	3371.3755	0.13101891	-0.132382093	0.039741439	-0.005977881	8.878158759
1503	am124	SHP	TIRE	1	0	2935.6617	0.00646481	-0.07499467	0.074293244	0.011258381	-2.491352639
1504	am124	SHP	BALLOON	1	0	2537.2288	0.215359158	0.130096076	0.023971595	-0.01466605	7.193583139
1505	am124	SHF	MOTH	1	0	1797.3086	0.034896219	-0.073590214	0.017523808	0.004775543	12.01161517
1506	am124	SHP	HOOK	1	0	3402.1073	0.196454361	0.084938177	0.024966814	-0.01685353	7.596962442
1507	am124	SHP	PIGEON	1	0	3261.3949	0.161091522	-0.032060881	0.139119319	0.04816491	2.499784357
1508	am124	SHP	BIBLE	1	1	2613.2738	0.317086182	0.293630624	0.105709769	0.019306893	23.29620895
1509	am124	SHF	SPOON	1	1	2159.6133	0.145862385	0.168475672	-0.009548151	0.017835156	11.03505865
1510	am124	SHP	BUTTER	1	0	2657.8825	0.281576052	0.115442627	0.123427866	-0.010621238	22.00481062
1511	am124	SHF	MONKEY	1	0	2612.1676	0.003083105	0.057478115	0.034098512	-0.005255483	22.43488126
1512	am124	SHF	CORN	1	0	1842.1743	0.126490103	-0.055398267	0.013418816	0.006249754	-17.57497089
1513	am124	SHF	TIGER	1	0	1870.8857	0.070944106	-0.04034196	-5.19E-05	0.009795978	-1.053797184
1514	am124	SHF	SHOVEL	1	0	3887.3538	-0.000634959	0.067270875	0.04222761	0.009232696	13.7760536
1515	am124	SHP	KEG	1	1	3371.2466	-0.104403915	-0.168296783	0.027120434	-0.007546727	-2.361625934
1516	am124	SHP	CRAB	1	0	2408.5464	0.203432725	0.115971245	0.137606438	0.008154111	-26.22932768
1517	am124	SHF	STAPLER	1	1	2035.2211	-0.068351788	-0.219598892	0.042816522	-0.00702188	9.363114324
1518	am124	SHF	TOWEL	1	0	2514.6386	-0.055549146	0.077866807	0.037220141	0.029280193	-3.765625821
1519	am124	SHF	STOOL	1	0	2448.2846	0.074257492	-0.074875014	0.049886104	0.003118445	0.620283113
1520	am124	SHF	BANANA	1	0	4520.3201	0.074106066	-0.062349244	0.012599513	0.007579217	15.04404027
1521	am124	SHP	APPLE	1	0	3808.2439	0.206205226	-0.078753449	0.045243524	0.008217164	-1.200102539
1522	am124	SHF	STRING	1	0	2712.4203	0.096963046	0.208868081	-0.020837853	-0.015314445	-6.257219404
1523	am124	SHF	PENNY	1	0	3267.902	0.088293089	-0.078276536	0.016765591	-0.000396447	-0.252497108
1524	am124	SHF	POTATO	1	1	3215.7825	-0.077537987	-0.232707985	0.037082951	0.013628666	17.18640129
1525	am124	SHF	SPONGE	1	1	2146.8527	0.202224115	-0.105406437	0.033697062	0.037413989	14.25537436
1526	am124	SHP	WALLET	1	0	2718.164	0.019159259	-0.182731058	0.083330947	0.002769573	1.277959311
1527	am124	SHF	MOUSE	1	0	1925.6662	-0.070571372	-0.115264537	0.024230446	0.016644089	14.15916273
1528	am124	SHP	CRADLE	1	0	3325.1165	-0.023540896	0.006920323	0.0759614	-0.003568591	7.461206711
1529	am124	SHF	CAPE	1	0	2632.7795	-0.062378947	-0.168495921	0.033190189	0.027293911	5.916552611
1530	am124	SHP	ELEPHANT	1	1	3287.2491	0.254191669	0.16230838	0.044361991	-0.011258004	-12.64285939
1531	am124	SHF	TURTLE	1	0	2616.9269	-0.371758535	-0.173452233	-0.025516196	0.008938944	-6.5868412
1532	am124	SHP	MOON	1	1	3401.2579	-0.268201523	-0.174933296	-0.024154327	-0.013832163	2.110676199
1533	am124	SHF	SCISSORS	1	0	1842.5764	0.003485513	-0.070653853	0.12018558	0.003643824	-9.009257793
1534	am124	SHF	SHOWER	1	1	2365.9796	0.070156569	0.095483449	0.047689574	-0.017185421	5.202007709
1535	am124	SHF	BONE	1	0	2843.5842	0.289896877	0.058196457	0.012885721	-0.001324237	-5.861403838
1536	am124	SHF	FLAG	1	0	4190.002	-0.062288504	-0.101169092	0.019261451	0.025520197	-6.433273646
1537	am124	SHP	BACON	1	1	3278.0057	0.031549892	0.024085603	0.079001642	0.016776361	-2.310812559
1538	am124	SHF	SYRUP	1	0	3603.5852	-0.262101613	-0.093476626	0.007641959	0.001171884	4.921363493
1539	am124	IF	DOLLAR	0	0	3247.6171	0.048053834	-0.056437333	0.004044026	0.028009493	-4.652367863
1540	am124	MP	TROPHY	0	0	2612.8294	0.209490342	0.233033883	0.039070202	0.02389397	2.20395513
1541	am124	SMP	PAIL	0	0	3172.3907	0.111034618	0.255248359	0.009622295	4.30E-05	-21.79768313
1542	am124	SMF	LADDER	0	0	2548.5636	-0.158913722	-0.071614232	0.014688231	-0.001494355	-7.309218915
1543	am124	IP	CAKE	0	0	2582.9489	-0.188094189	-0.156739386	-0.010461433	0.004726604	-2.872741801
1544	am124	MF	PILLOW	0	0	2772.6629	-0.022846873	0.037958832	0.013238602	0.047509286	-0.162942567
1545	am124	IP	FENCE	0	0	3077.6107	-0.173843861	-0.130823203	0.010938612	0.003131216	4.952246053
1546	am124	MF	TOAST	0	0	3098.7969	0.185533937	0.114827819	0.033776838	0.004282475	-21.16301572
1547	am124	SMP	PAN	0	0	3222.4558	0.194288265	0.175068234	0.055899499	0.016743614	-4.187419834
1548	am124	SMF	MILK	0	0	2951.6897	-0.099423701	-0.119132971	-0.016111549	-0.032411011	-13.16061757
1549	am124	MP	CHEESE	0	0	3062.5988	-0.213706289	-0.136523771	0.033026632	0.014492763	24.38396834
1550	am124	SMF	NEEDLE	0	0	2444.5441	-0.024760669	0.160252027	-0.015827494	-0.008715611	-6.317300266
1551	am124	IP	PLATE	0	0	2071.4808	-0.083704055	-0.10809572	0.00473047	-0.003579408	-3.840395744
1552	am124	SMP	ROPE	0	0	2945.5034	-0.17336744	-0.088727591	-0.010993707	0.011098692	-14.6788733
1553	am124	SMP	HAMMER	0	0	2744.8075	0.084412842	0.071631111	0.071347749	-0.001688252	2.492885279
1554	am124	MF	MAP	0	0	3283.2279	-0.164604862	-0.078802214	0.080252863	0.077617076	23.8082746
1555	am124	IP	COUCH	0	0	3331.4745	0.034813484	-0.115269613	-0.042569097	0.00374253	12.94757848
1556	am124	IF	CAMERA	0	0	3022.2915	-0.146473944	-0.08206229	-0.055157391	-0.023000089	-11.17671523
1557	am124	IP	KNIFE	0	0	3226.6465	0.389898984	0.130825257	0.016819228	0.007340515	-8.575774764
1558	am124	SMP	PIE	0	0	3011.0665	0.025003233	0.084695275	0.051660209	0.011989276	-11.49717112
1559	am124	IF	TRAY	0	0	2672.5352	-0.033326823	0.005747437	-0.056350147	-0.033971769	-11.54326686
1560	am124	IP	BOOT	0	0	2551.0364	0.180427745	0.084980667	0.033116908	0.01216784	3.938594166
1561	am124	IF	BENCH	0	0	2144.9827	-0.249912209	-0.031384082	-0.061026836	-0.020878533	3.852715675
1562	am124	IF	MUSTARD	0	0	3337.8429	-0.179263088	-0.109275739	0.017513341	-0.033671065	10.84149427
1563	am124	MP	BASKET	0	0	3927.0609	0.02954567	-0.122978746	0.077060758	0.033579231	-18.69782264
1564	am124	IF	BROOM	0	0	3181.1969	0.200016435	0.205447298	0.07226974	0.050960522	-4.84128321
1565	am124	IF	CROWN	0	0	4069.8862	0.094918043	-0.010232963	0.044940893	0.063430746	-22.34794625
1566	am124	MF	BRAIN	0	0	1826.0508	-0.042091978	-0.121919965	0.001223308	-0.005596247	17.97989901
1567	am124	IP	DESK	0	0	3786.3925	-0.027337951	0.050167202	-0.021510108	-0.006321495	3.15921855
1568	am124	SMP	HONEY	0	1	2580.2936	0.064048031	-0.234687802	0.013902626	-4.29E-05	-8.724867997
1569	am124	SMP	PARADE	0	0	3706.1411	0.105353723	0.005093838	-0.028525475	-0.009151787	-5.941760432
1570	am124	IP	OVEN	0	0	2923.9393	-0.089914853	-0.207593356	0.044592267	0.012597432	-0.465988014
1571	am124	SMP	ORANGE	0	0	2822.4188	0.066800688	0.008385004	0.048963806	0.009631996	2.6981754
1572	am124	SMF	WINE	0	1	2077.8085	0.083174147	-0.029362519	0.011638923	0.016827711	35.22069264
1573	am124	SMP	CANE	0	0	3325.1941	0.048324573	0.127049474	0.011655394	-0.014705126	-3.763305041
1574	am124	MP	ARROW	0	0	3383.5928	-0.013505138	-0.153329292	0.018660319	0.010690625	-33.07496509
1575	am124	IP	MITTEN	0	0	3232.8627	-0.258272117	0.094937104	-0.012966567	0.002699827	-6.738096176
1576	am124	IF	KETTLE	0	0	3966.4397	0.137755219	0.197422584	0.046987636	0.020551812	-9.345298832
1577	am124	IP	FAN	0	0	3316.3486	0.134452564	0.139244206	-0.007034543	-0.01937967	9.477537416
1578	am124	IF	KITTEN	0	0	3187.4335	-0.026673141	-0.137502806	0.034225961	0.022325964	13.8943877
1579	am124	IP	FORK	0	0	3650.7709	0.162133652	-0.002601914	0.003250907	-0.001922333	-11.05804643
1580	am124	SMP	CANNON	0	1	3964.5395	0.157184115	0.146350649	-0.009173464	-0.027018077	6.095723058
1581	am124	SMP	ENVELOPE	0	0	3842.3858	0.077625272	-0.026695397	-0.00275577	-0.00791161	2.571855918
1582	am124	IP	CHICKEN	0	0	3280.2109	0.067526787	-0.014615567	0.016168935	0.014996329	-9.87617174
1583	am124	MP	FLASK	0	0	3097.867	0.079362228	0.115588742	0.011403651	0.022599887	8.900898457
1584	am124	IP	TRUMPET	0	0	3536.2093	-0.115928109	0.185020807	0.064523403	0.021967767	5.976935247
1585	am124	IF	TRACTOR	0	0	3261.4099	-0.083631183	-0.191340568	0.020991184	0.024132204	3.09219201
1586	am124	IF	CAGE	0	0	3568.5209	-0.199159358	-0.158166589	-0.031689052	-0.020953588	-8.034064185
1587	am124	IF	BELL	0	0	3384.9059	-0.0108003	0.033410418	-0.000257454	-0.018282136	-2.715327558
1588	am124	IP	SOAP	0	0	3587.6296	0.237160882	0.026666667	0.056269289	0.001848612	-14.92555627
1589	am124	IF	PENCIL	0	1	4082.0712	-0.144196467	-0.101709966	0.039930573	0.052382711	2.229965338
1590	am124	IF	GUITAR	0	0	3903.8191	0.27080668	0.207993132	0.043205786	0.021186113	-11.76865337
1591	am124	SMP	CARROT	0	0	3823.5313	0.062982793	0.19645743	0.036608733	0.019996805	8.201711522
1592	am124	IF	CHERRY	0	0	3058.2085	-0.122038281	-0.042839911	-0.048294654	-0.049801514	-32.17962143
1593	am125	SHF	OMELET	1	0	2458.0409	0.169938758	0.050579846	0.022404247	0.023423158	7.601545649
1594	am125	SHF	CANE	1	1	1927.6177	0.179612794	0.054007326	0.015437572	0.02411282	8.060370085
1595	am125	SHP	FAN	1	1	2664.6136	0.052440503	-0.000449716	0.027410105	0.021783086	-5.926035557
1596	am125	SHF	BANANA	1	0	3398.0271	0.102692644	-0.061121953	0.028246441	0.002939563	4.124641515
1597	am125	SHF	FLAG	1	0	2775.5101	-0.104110423	0.014684339	0.027152661	0.018680047	-7.823054919
1598	am125	SHF	HAM	1	0	1471.2186	-0.055070562	0.050251396	0.039202343	0.024420386	16.35878338
1599	am125	SHF	WOLF	1	0	2263.5918	0.052528486	-0.058951217	0.047607768	0.016534416	12.45522657
1600	am125	SHP	ENVELOPE	1	0	1795.19	-0.045542593	0.076168637	0.019737655	-0.004078276	6.121526138
1601	am125	SHF	STAPLER	1	0	2241.6029	-0.034522575	-0.192849123	0.00562377	0.001963871	-6.483016988
1602	am125	SHP	SYRUP	1	0	2042.4527	0.077825553	0.051775185	0.053065376	0.021777794	6.995155965
1603	am125	SHF	BIBLE	1	1	2191.8224	0.029517788	-0.045957387	0.041961875	0.004655041	2.503360146
1604	am125	SHF	UMBRELLA	1	0	1705.7327	0.034095719	0.023242992	0.018966296	0.018451122	15.08670163
1605	am125	SHP	ANCHOR	1	1	1592.7052	0.09965868	-0.027055979	0.012573581	0.042758959	9.754881208
1606	am125	SHF	HONEY	1	0	2067.8008	0.076001217	-0.012148922	0.039351267	0.024668221	4.659265369
1607	am125	SHF	PLATE	1	0	2069.0999	-0.067281055	-0.089772462	0.045505094	0.041270615	8.399564262
1608	am125	SHP	SHOVEL	1	0	2084.7579	0.119196518	0.094800016	0.051160162	0.049419295	-7.072428919
1609	am125	SHF	HIGHWAY	1	0	1737.5158	-0.027648822	-0.076431023	-0.001940496	0.016148049	11.90996345
1610	am125	SHP	TOILET	1	1	2863.9331	0.010275601	0.040786319	0.009836982	-0.006695066	9.482226882
1611	am125	SHF	MOON	1	0	1631.4224	-0.00563046	-0.028642095	0.038898264	0.02104942	-10.44980265
1612	am125	SHP	SEAL	1	1	2025.6753	0.016054217	0.035482278	0.018474881	0.025886151	10.97187409
1613	am125	SHF	LIZARD	1	0	2406.8473	-0.036296757	0.112910761	0.034107572	0.020709413	-2.781461856
1614	am125	SHF	SOUP	1	0	1941.2171	-0.042401697	-0.090914899	0.024825078	0.009312244	12.84603457
1615	am125	SHP	OTTER	1	0	2680.7115	0.106267704	-0.049490848	0.050961145	0.028566896	1.513310039
1616	am125	SHF	BRAIN	1	0	3031.0545	-0.030347484	-0.050858897	-0.008987661	-0.011067339	0.687490585
1617	am125	SHF	PAIL	1	0	2228.8149	0.03876368	0.067873848	0.021387539	0.036913779	-11.62291729
1618	am125	SHF	BALLOON	1	0	3203.8888	0.094268024	0.0856783	0.021161207	0.036769403	-4.679508651
1619	am125	SHF	OYSTER	1	0	3067.8501	0.001607481	0.026695807	0.009293087	0.034179438	20.24173
1620	am125	SHF	PAN	1	0	3515.7948	-0.032706349	-0.104314886	0.019682405	0.021355213	-10.30956749
1621	am125	SHF	CIGAR	1	0	2782.7247	-0.066785232	0.140612246	0.018155225	0.013168451	6.064303288
1622	am125	SHF	CARROT	1	0	2479.5255	0.000383519	0.020744389	0.004740021	0.004242931	-6.388118595
1623	am125	SHF	CAKE	1	0	2040.66	0.044150236	-0.074601306	0.008835222	-0.00368906	10.18494426
1624	am125	SHF	ORANGE	1	0	1574.7554	-0.001867465	0.173505733	0.027147691	0.025675864	-5.04839807
1625	am125	SHF	VIOLIN	1	0	2556.7661	-0.004150138	0.023378961	0.017217797	0.033916073	0.128908027
1626	am125	SHP	TURTLE	1	0	2667.2297	-0.00665461	0.144202166	0.066935828	0.044513	10.82023322
1627	am125	SHF	CRADLE	1	1	2229.2913	0.132006419	0.1850237	0.011757016	0.020579607	-2.007362627
1628	am125	SHF	PURSE	1	0	1880.6565	0.046340009	0.056908835	0.013598014	0.008142459	-1.53574414
1629	am125	SHP	HOSE	1	0	3084.8758	-0.068699962	-0.036357045	-0.049632291	0.044347121	-4.946752822
1630	am125	SHF	ELEPHANT	1	0	2806.1859	-0.098759937	-0.027221213	-0.004948208	-0.008407237	-3.464806827
1631	am125	SHF	MUG	1	0	2298.1428	0.053690252	0.081814307	0.025939427	0.022869247	0.454979952
1632	am125	SHP	SPONGE	1	1	2636.1629	0.092549918	0.038302864	-0.004405453	0.028150737	0.238320311
1633	am125	SHP	ROPE	1	0	2314.0616	0.0708715	0.059197001	-0.000558238	0.023431177	11.04218832
1634	am125	SHF	WINE	1	0	2209.1063	0.069085224	0.091573754	0.006722043	-0.014241075	7.924377683
1635	am125	SHF	GOAT	1	0	2248.7917	-0.088309006	-0.074362618	-0.001878294	0.01794347	20.52881558
1636	am125	SHF	NAPKIN	1	1	2413.5062	0.043745832	0.097898592	0.03414427	0.023447033	4.502103865
1637	am125	SHP	CHEESE	1	0	2211.0115	-0.113582626	-0.019744682	0.014570336	0.062970229	-21.1760975
1638	am125	SHP	DRUM	1	0	2492.8539	0.087657751	0.108998752	0.020563053	0.030954513	0.241313689
1639	am125	SHP	ROCKET	1	1	2565.627	0.112665031	0.06616518	0.025789255	0.01120862	-4.361148442
1640	am125	SHF	BOWL	1	0	1885.8493	-0.071793427	-0.063959818	0.021853145	-0.003385892	12.73221386
1641	am125	SHF	TRUMPET	1	0	3205.3963	0.052650443	0.008274086	0.01170791	-0.008357071	21.46664787
1642	am125	SHP	SPOON	1	0	2543.7669	0.120398688	0.038709364	0.067595178	0.045747119	8.432191518
1643	am125	SHF	PILLOW	1	0	1832.5347	0.125819092	0.034915262	-0.003046655	0.029922535	0.692972335
1644	am125	SHF	NET	1	0	3195.4881	-0.083626337	-0.098001199	0.020903187	0.007536559	4.068226814
1645	am125	SHF	QUILT	1	0	1527.6793	0.116765818	0.038190437	0.041003613	0.02352263	10.26104014
1646	am125	SHP	CANDLE	1	1	3501.2235	-0.050532991	0.069234929	0.0155192	0.0388612	3.37540924
1647	am125	SHP	PENNY	1	1	2958.3913	-0.087939643	0.005163226	0.017572263	0.017286675	7.266584107
1648	am125	SHP	SOCK	1	0	2863.2386	-0.037998611	-0.028546999	0.001046495	0.007110836	-4.915629777
1649	am125	MP	RABBIT	0	0	2195.0271	0.096330329	0.039495375	0.03502054	0.00975348	7.418258406
1650	am125	SMP	LION	0	0	3598.8914	-0.015601174	0.084563579	-0.002027191	0.018063158	17.04879723
1651	am125	SMP	SWORD	0	0	2648.0962	-0.044025656	0.045544363	0.00338554	0.003676113	8.601463308
1652	am125	MF	FORK	0	0	1967.3591	0.122328646	0.030191027	0.03325588	0.017630423	-1.480542409
1653	am125	SMF	ARROW	0	0	2549.4221	0.138738463	0.027465742	0.016564467	-0.004518864	-11.63181024
1654	am125	IP	TRAY	0	0	1906.335	-0.069260305	-0.061738992	0.001761213	0.016991046	5.30156433
1655	am125	MP	PHONE	0	0	1869.2601	0.090107395	0.064276151	0.013414253	0.020471775	-16.76479013
1656	am125	IF	SOAP	0	0	2924.6734	0.012994891	0.018823895	0.00899713	0.023264541	19.53399126
1657	am125	SMF	NEEDLE	0	0	1639.2587	-0.069109522	-0.050776064	0.024873667	0.007570913	8.73945755
1658	am125	IF	CLOCK	0	0	1955.3258	-0.140742987	-0.091537011	-0.012304722	-0.003000784	4.166552757
1659	am125	MP	BENCH	0	0	2276.4554	0.021737138	0.029429817	0.010268947	-0.004414853	3.308785689
1660	am125	SMP	CAMERA	0	1	2659.6255	0.044472897	0.035844993	0.014721478	0.006222592	-1.144198027
1661	am125	SMP	CANNON	0	0	2298.788	0.075279054	0.082802074	0.027106412	0.005296895	-9.624635068
1662	am125	IF	BASKET	0	0	2476.405	-0.136644186	-0.098601933	0.008429402	0.027558179	15.60273491
1663	am125	SMP	WHIP	0	0	2495.2701	-0.003513004	0.0232297	-0.003476453	0.014620356	1.28903496
1664	am125	IF	KNIFE	0	0	3003.9747	-0.080024504	0.070335227	0.004945542	0.031591252	-9.44824219
1665	am125	SMP	PYTHON	0	0	3368.3731	0.177673554	0.192158949	-0.003822697	0.015949168	-13.71107303
1666	am125	MP	MOUSE	0	0	2228.6946	-0.017017293	0.030499793	0.024008868	0.015132386	-19.97634521
1667	am125	SMP	PENCIL	0	0	2946.1435	0.035094249	-0.036257412	0.016732169	0.022730495	8.205709799
1668	am125	IF	CHICKEN	0	0	2052.1187	-0.04632761	0.065303732	0.017532656	0.007219357	10.40406739
1669	am125	MP	JACKET	0	0	2275.488	0.019191433	-0.035618535	0.024520896	0.003743388	-13.1822087
1670	am125	IP	STRING	0	0	2012.317	-0.03518681	-0.005322358	-0.002827609	0.004696054	1.714927155
1671	am125	MF	LOCKER	0	0	1912.6401	-0.085553535	-0.042112442	-0.017516719	-0.006366087	-4.725411007
1672	am125	SMP	ROSE	0	0	2137.7099	-0.051830939	-0.024754808	0.031311009	0.027059487	-0.470813919
1673	am125	SMP	KITTEN	0	0	2617.3113	-0.103530783	-0.22878994	-0.007236838	-0.008403833	4.582950315
1674	am125	IP	BELL	0	0	2365.2425	-0.058615826	-0.012774976	0.008946154	0.00815601	-2.885423988
1675	am125	IP	BOOT	0	0	3264.3773	0.057247605	-0.081357698	0.014755863	0.006426004	-4.959692925
1676	am125	SMP	PIE	0	0	1789.4829	0.07054327	0.021174302	0.024617741	0.01897635	4.98393618
1677	am125	IF	RAILROAD	0	0	2938.4775	0.080709176	0.241241257	0.000230518	0.030627737	8.246813722
1678	am125	IP	CAGE	0	0	2527.0744	0.136422721	0.123013952	0.011091606	0.003260932	8.881917885
1679	am125	IP	STOOL	0	0	3363.6363	0.05625592	-0.044655611	0.005066507	0.023893863	2.443460018
1680	am125	SMF	FENCE	0	0	2875.8117	-0.052047603	-0.040791172	-0.018246419	-0.009576588	1.767240325
1681	am125	MP	NEST	0	0	3407.4676	0.068130374	0.024343474	-0.010827876	0.01654344	15.86207088
1682	am125	IP	PARADE	0	0	3295.9671	-0.117825147	0.06830011	0.025035663	0.004185768	-4.62661855
1683	am125	SMF	TRACTOR	0	0	2042.7565	0.059322988	0.068096129	-0.022573432	0.028210943	-2.744604843
1684	am125	IP	TIRE	0	0	1837.3898	-0.033928028	-0.03797132	0.037364495	0.034992506	0.956180823
1685	am125	IF	GUITAR	0	1	2657.7823	0.150018502	-0.035121448	-0.001377068	-0.0062435	3.910271936
1686	am125	SMP	BUTTER	0	0	2523.929	0.053081745	-0.066060238	0.027637507	0.027449675	2.884223338
1687	am125	SMP	DOLLAR	0	0	1487.4799	0.111721657	-0.064228014	0.030498536	0.014169049	-8.813094726
1688	am125	SMP	TAXI	0	0	3713.996	2.85E-05	-0.073267957	0.013061577	0.018275158	-11.07305361
1689	am125	IP	MAGNET	0	0	2942.1299	-0.015045537	-0.097691739	0.031873866	0.005325766	-0.349126093
1690	am125	SMF	LADDER	0	0	3299.6227	0.029707101	-0.009183435	0.022521736	0.034619439	-16.08634764
1691	am125	MF	DIAMOND	0	0	2789.0939	-0.033292597	-0.029097207	-0.005242947	-0.00531708	2.240300721
1692	am125	IP	FLASK	0	0	3215.4033	-0.051917143	0.05211789	0.008938124	0.0120577	-3.436904887
1693	am125	SMP	MILK	0	0	1479.3942	0.090897749	-3.18E-05	0.021659477	-0.004945993	11.87031112
1694	am125	SMF	KETTLE	0	0	2406.0925	0.076822559	0.042149721	0.003696118	0.015580639	2.368485874
1695	am125	SMP	DOLL	0	0	1755.9298	0.026021076	0.044272703	0.011833076	0.021886166	16.85016049
1696	am125	SMP	DEER	0	0	1895.9463	0.118485249	0.195925236	0.020920237	0.020141621	-3.112338272
1697	am127	SHF	SOAP	1	1	2441.1882	-0.090204484	-0.018162364	0.03722011	0.018311521	5.395601738
1698	am127	SHF	DUCK	1	0	2868.4865	0.065861522	0.115974005	-0.011156296	-0.012722051	3.147880297
1699	am127	SHP	STAPLER	1	0	2671.1552	0.105219919	0.045410783	0.135298513	0.069531493	14.65142146
1700	am127	SHP	ORANGE	1	0	1457.2379	0.019832967	-0.14705822	0.160761273	0.072974477	-13.45603625
1701	am127	SHF	CANE	1	0	2167.1973	0.038297717	-0.088878852	-0.079332163	-0.012296597	-6.231023208
1702	am127	SHF	FLAG	1	1	3147.3586	-0.161897015	-0.183301771	0.013749191	0.002741545	11.38964912
1703	am127	SHP	VIOLIN	1	0	3315.1055	0.129527314	0.218103576	0.114863776	0.042090795	19.38730072
1704	am127	SHP	RAILROAD	1	0	1412.6615	0.106616807	0.112558611	0.119492678	0.046367622	2.070791766
1705	am127	SHF	LION	1	1	1453.9029	0.007196926	0.022221787	0.08998288	0.079411875	7.747838648
1706	am127	SHF	PAIL	1	0	2310.3667	-0.152975281	-0.134503329	0.072913335	0.090150113	11.08051509
1707	am127	SHP	WOLF	1	0	3359.4333	-0.227015212	-0.134217058	-0.015783698	0.000570181	5.377306826
1708	am127	SHP	OMELET	1	0	2127.2063	0.266423641	0.102171481	0.141143439	0.020167382	-7.505937634
1709	am127	SHF	MANURE	1	1	2176.1819	-0.133284682	-0.06171788	-0.072143944	-0.016982988	28.25211298
1710	am127	SHP	STAR	1	0	3220.1758	0.106629312	0.013666873	0.051801618	0.043190369	2.87281221
1711	am127	SHF	BRAIN	1	1	1297.2898	0.018406151	-0.087057277	-0.071407481	0.024619593	14.53137112
1712	am127	SHP	PENNY	1	0	1958.6831	0.1593598	0.020475398	0.044252157	-0.017515778	-28.18871248
1713	am127	SHP	CAPE	1	0	3029.1654	-0.078270257	-0.028903776	0.020308974	0.00963125	15.81747383
1714	am127	SHF	CANOE	1	0	2231.8819	0.033223343	-0.028314452	0.039372558	-0.005230833	17.55041752
1715	am127	SHP	MONKEY	1	0	2266.9303	0.125491709	0.006360547	0.170695479	0.081259679	19.7112716
1716	am127	SHP	LIME	1	0	2124.4757	-0.060023472	-0.121385847	-0.097878948	-0.044623334	22.65387058
1717	am127	SHF	PARADE	1	1	2233.9231	0.195796514	0.106128898	0.038976775	0.011351804	28.10372518
1718	am127	SHF	TURTLE	1	0	2049.2462	-0.188424951	-0.19321988	-0.044869813	-0.039571795	16.97407119
1719	am127	MF	SHOWER	0	0	1957.2681	0.037521218	0.123657363	0.000612002	-0.018044846	-17.493141
1720	am127	MF	WALLET	0	0	1866.7038	0.138130174	0.085597667	0.057364734	0.024815614	5.613668887
1721	am127	MP	MUFFIN	0	0	1730.9271	-0.012404635	-0.041829514	-0.032261898	0.023521647	-7.723788899
1722	am127	MF	STOOL	0	0	1452.4411	0.016453998	0.183959174	-0.074495785	0.007350259	8.137237212
1723	am127	MP	DEER	0	0	2157.8704	-0.017327161	0.205846411	0.016475276	0.065926162	-0.070234592
1724	am127	IP	FAN	0	0	1367.7193	-0.283970224	-0.009713789	0.019984275	-0.016779764	-5.263735423
1725	am127	MF	HOSE	0	0	1774.1853	0.170938918	0.006935527	0.037254737	0.009992378	-13.79223841
1726	am127	IP	PAN	0	0	903.6091	-0.067016266	0.02490685	-0.023042083	-0.033174326	13.4754029
1727	am127	IF	CAGE	0	0	2646.2309	0.170190076	0.096652628	-0.020281895	-0.002048274	2.38313241
1728	am127	MP	ANCHOR	0	0	2142.602	0.061995764	0.067260203	0.016978129	0.010864454	-22.93344618
1729	am127	MF	ROSE	0	0	1975.397	-0.062006915	-0.018409384	-0.012557471	0.019864616	-2.065812608
1730	am127	MP	BENCH	0	0	1187.9817	0.043179732	0.207891821	0.01285784	0.032126998	-32.26772025
1731	am127	MF	BANANA	0	0	1380.6237	-0.279873262	-0.176108506	0.011003346	0.040398677	3.089675618
1732	am127	SMP	NAPKIN	0	0	2895.0911	0.119212784	-0.010774855	0.059173428	0.015652108	-1.389588216
1733	am127	MP	DOLLAR	0	0	1589.8147	-0.080153167	0.023288529	0.083353196	0.065726189	11.97280097
1734	am127	MF	SOUP	0	0	1163.6247	0.121380927	0.038795586	-0.017782948	0.038004588	-13.00777388
1735	am127	MF	DESK	0	0	1224.2572	0.050491165	0.287965694	0.001319794	0.001053196	-11.82570442
1736	am127	MP	HOOK	0	0	2002.2693	0.252224761	0.182023359	-0.034604446	-0.02513566	17.76706604
1737	am127	SMP	ENVELOPE	0	0	2487.1814	-0.024263751	-0.070990002	-0.007153489	0.04799408	5.82103543
1738	am127	MF	BARREL	0	0	1327.1228	-0.105972148	0.073565318	-0.05957943	-0.003465593	-6.86749015
1739	am127	MP	COUCH	0	0	1578.7188	-0.006229772	0.110351424	-0.105941952	-0.052716465	-18.78854563
1740	am127	MP	HIGHWAY	0	0	1275.7836	0.284232407	0.210565817	-0.009495387	-0.014993115	-26.33971541
1741	am129	SHF	BONE	1	0	3983.3454	0.127567885	0.118501006	0.004761661	0.031158287	39.23860203
1742	am129	SHF	DOLL	1	0	4114.2128	-0.038271841	-0.01699793	-0.048883719	0.014562355	6.975385163
1743	am129	SHF	CLOCK	1	0	3980.9408	0.001558566	0.055653442	0.072829882	0.00140138	-3.371797085
1744	am129	SHF	BARREL	1	0	3981.5167	0.196353992	0.094533322	0.0402753	-0.000684726	-5.72027334
1745	am129	SHF	WOLF	1	1	1650.7901	-0.146120608	-0.141938121	-0.010308148	-0.001977405	19.24709215
1746	am129	SHF	BASKET	1	0	1822.9522	0.388897022	0.212066233	-0.05388186	0.002585703	-26.01542438
1747	am129	SHP	STAR	1	0	3984.0536	0.008020148	-0.076177691	0.003391966	0.036730673	-9.433868558
1748	am129	SHF	BADGE	1	0	1858.795	-0.123045566	0.043030948	-0.016197301	-0.003542438	4.037780716
1749	am129	SHP	TIRE	1	0	3759.5108	-0.101153795	-0.076563589	-0.071076529	0.017680252	0.596413254
1750	am129	SHF	MILK	1	0	3193.0494	0.146643444	0.09680033	0.069104237	0.021922344	11.31388457
1751	am129	SHP	FLAG	1	0	3089.0772	0.327344586	0.011772449	0.054021179	0.026047274	3.756438096
1752	am129	SHF	MUSTARD	1	0	2876.5973	0.043359102	0.174941365	0.066663247	0.016649263	18.31450407
1753	am129	SHP	VIOLIN	1	0	4120.2885	-0.060224702	-0.015503465	0.043870994	0.014495583	-12.65333448
1754	am129	SHP	DESK	1	0	3081.0074	-0.234677256	-0.162095929	0.031579057	0.02642405	31.41141875
1755	am129	SHF	CAKE	1	0	2712.5854	-0.194325831	-0.137572395	-0.05539463	0.009235321	7.574430451
1756	am129	SHP	MAGNET	1	0	2057.3943	0.23494874	0.168637594	-0.014808637	0.038691179	-17.24029032
1757	am129	SHF	MOUSE	1	0	2792.8846	-0.140366276	0.026422308	-0.025837884	0.006273396	8.97883361
1758	am129	SHF	SHOVEL	1	0	3350.3264	0.044467437	0.05289658	-0.093921467	-0.024010652	7.939592526
1759	am129	SHP	DRUM	1	0	2293.16	-0.032570666	0.032620211	0.064174725	0.052858186	48.96255157
1760	am129	SHP	TOAST	1	0	1775.2251	0.07361016	0.09881839	-0.055399573	-0.017476213	-2.53564263
1761	am129	SHP	ROSE	1	0	2195.2436	0.145092302	0.037703319	-0.012388944	0.019394631	12.42251451
1762	am129	SHF	FLASK	1	0	2257.7931	-0.110790843	-0.074662887	-0.039806222	-0.029887282	22.8088513
1763	am129	SHF	RABBIT	1	0	1575.9991	-0.014108802	-0.076318173	-0.046647541	-0.021510226	-30.84858341
1764	am129	SHF	CROWN	1	0	1581.5434	0.067163884	0.125469437	-0.044490893	-0.01151719	31.85844361
1765	am129	SHP	BALLOON	1	0	2332.7309	-0.031554185	-0.019375611	0.035704689	0.00765118	10.36065519
1766	am129	SHF	CAMERA	1	0	1844.8322	0.176805892	0.052763704	0.045701056	0.004770006	17.10222289
1767	am129	SHF	TIGER	1	1	2567.7798	-0.242024564	-0.030745301	0.10006935	0.046558151	18.0179771
1768	am129	SHF	SCISSORS	1	0	1629.1859	0.175627418	0.018880495	0.025735524	0.01336289	15.16105223
1769	am129	SHP	CHERRY	1	0	2130.6635	0.220635514	0.018638358	0.006101894	0.051691684	1.605039727
1770	am129	SHP	MONKEY	1	0	2028.0143	-0.163362484	-0.062266964	-0.023359568	0.026090859	1.401956155
1771	am129	SHP	NAPKIN	1	0	2495.0046	0.022262423	-0.040948404	0.030357808	0.046786376	13.84557674
1772	am129	SHF	SPONGE	1	0	3207.0682	0.010447098	-0.019099572	0.00494619	0.009941281	3.226451369
1773	am129	SHF	DUCK	1	0	1593.691	-0.296214447	-0.096555942	-0.026305639	0.019040447	12.35970261
1774	am129	SHF	CRAB	1	0	3239.9108	0.108425908	0.095784429	0.009919862	-0.012969433	4.454043158
1775	am129	SHF	SPOON	1	0	2845.8414	0.069951418	0.152721002	0.04606974	0.063011879	20.56262187
1776	am129	SHF	TRAY	1	0	2562.5731	0.043621844	0.125424711	0.006435281	0.050410711	29.30690771
1777	am129	SHP	ORANGE	1	0	2352.352	0.171006342	0.047327046	-0.010325636	0.020505077	2.668053075
1778	am129	SHP	WHIP	1	0	2044.8549	0.109831159	0.068446497	0.041506957	0.009832368	-0.438872494
1779	am129	SHF	MAP	1	0	1431.1231	-0.064505328	0.062712401	-0.006168021	-0.05662388	-13.0408755
1780	am129	SHP	CAPE	1	0	2611.8382	0.164322238	0.035487142	-0.045240184	-0.003037689	20.44553184
1781	am129	SHF	TRUMPET	1	0	1234.0399	0.034096213	-0.105393679	-0.013119476	0.003451134	-0.327096045
1782	am129	SMP	DOLLAR	0	0	2656.034	0.105544326	-0.059442039	0.014832167	0.024032116	-51.18431786
1783	am129	SMF	TROPHY	0	0	2323.4076	-0.241037043	-0.164732055	0.011313153	0.034307271	-3.861078574
1784	am129	SMP	COFFEE	0	0	2365.8652	-0.190024773	-0.090610939	0.006329989	0.003961258	17.96075455
1785	am129	MP	DEER	0	0	2627.508	0.043062182	-0.030320202	0.017154485	0.022407741	-19.1038354
1786	am129	SMF	PILLOW	0	0	3978.9558	-0.355111145	-0.000103173	0.027503482	-0.01037223	5.733951826
1787	am129	SMP	BRAIN	0	0	2416.6238	-0.10329999	-0.112298998	-0.008690241	-0.001194637	-37.39474571
1788	am129	SMP	RAILROAD	0	0	2751.709	0.075170791	-0.152308378	0.026091576	0.018377313	28.60206539
1789	am129	MP	MOTH	0	0	1811.5827	0.007812286	0.043446565	-0.007502663	0.014607024	33.26268791
1790	am129	MF	BENCH	0	0	1710.6227	-0.428054673	-0.064546808	-0.022028073	-0.008817511	-0.190840023
1791	am129	SMP	UMBRELLA	0	0	3983.4353	-0.061483632	0.106967982	-0.033857944	-0.002831513	-1.46478871
1792	am129	IP	MUG	0	0	3512.6363	-0.250612215	-0.133767808	0.023502183	0.00270216	-10.64026346
1793	am129	SMF	FENCE	0	0	2211.6774	-0.197353721	-0.027784745	-0.006093066	0.025520314	12.78146595
1794	am129	MP	PARADE	0	0	3980.5525	0.03940565	0.175044952	-0.026998822	-0.003927672	-6.495418058
1795	am129	MF	LION	0	0	3319.343	-0.047761764	-0.030541029	-0.002608662	0.011664652	17.19627981
1796	am129	SMP	SHEEP	0	0	3982.8199	0.072359029	-0.203034251	0.040414151	0.027495571	14.46896929
1797	am129	SMP	HAM	0	0	2134.1907	0.108399809	-0.055130764	0.034815582	0.029705871	-32.35826079
1798	am129	SMP	CRADLE	0	0	2043.4022	0.101007569	-0.086268105	0.071157318	0.030638324	-0.614332764
1799	am129	SMP	KITTEN	0	0	3838.7609	-0.092362045	-0.104415431	0.029032769	0.01339023	-13.0108582
1800	am129	IF	FAN	0	0	4353.647	-0.130581097	-0.012247691	0.017191293	0.016327748	26.5778821
1801	am129	SMF	TRACTOR	0	0	3983.7012	0.031149055	-0.006384027	0.000712279	-0.005567517	35.3891268
1802	am129	SMF	CANOE	0	0	2543.4741	-0.192154087	-0.197393938	0.002718102	-0.002390677	6.409068414
1803	am129	SMP	PENCIL	0	0	3985.2735	-0.058422282	0.148779543	-0.020392506	0.004408338	-21.62411896
1804	am129	MP	LOCKER	0	0	3583.0914	-0.09094092	-0.017781179	0.093341318	0.034720765	3.692959029
1805	am129	SMP	SHOWER	0	0	2265.9784	0.081375217	-0.143437544	0.022571025	0.040223979	14.27860682
1806	am129	SMF	CANNON	0	0	2069.125	0.081255532	0.162846218	0.0247541	0.028092407	-16.3989341
1807	am129	MF	STRING	0	0	3376.3554	-0.182605103	-0.084681024	0.005938469	-0.005087631	5.350164313
1808	am129	SMP	HOOK	0	0	3343.5401	0.219587356	0.171884826	0.063297156	0.038010716	-10.74040474
1809	am129	SMP	WINE	0	0	2773.765	-0.253870399	-0.086626753	0.00492963	0.005912129	7.57604928
1810	am129	SMF	JELLY	0	0	3397.695	-0.025566846	-0.038424616	-0.018985375	0.016540333	-17.05209126
1811	am129	SMP	STAPLER	0	0	1915.3078	0.047307986	-0.023310864	-0.028384816	-0.004842649	-2.654510857
1812	am129	MF	NEST	0	0	3312.9676	0.042426259	-0.180584993	-0.012977372	-0.012446807	7.861506451
1813	am129	SMP	PIANO	0	0	2000.2847	-0.193220405	-0.122541848	-0.01457415	-0.016251499	-4.96484419
1814	am129	SMF	SOUP	0	0	2633.2207	0.143325247	0.046503089	0.01510276	-0.013519377	-1.802734844
1815	am129	SMP	ROCKET	0	0	2399.528	-0.041802097	0.067783011	0.01770035	0.013118583	9.717700828
1816	am129	IF	GUITAR	0	0	3930.4927	0.270271379	0.2358193	0.033622586	-0.010197629	-2.327890815
1817	am129	MP	ELEPHANT	0	0	3332.3646	0.012415977	-0.020741571	0.107336058	0.052516162	16.24119412
1818	am129	SMF	OVEN	0	0	1953.8924	-0.133479802	0.008163747	-0.003996324	0.009989205	2.795053497
1819	am129	IP	ANCHOR	0	0	3365.7413	-0.064156405	-0.073557024	0.056661023	0.011576503	18.13463441
1820	am129	SMP	BROOM	0	0	2055.3665	0.377985431	0.147841417	-0.01261559	0.007572761	15.14747139
1821	am129	SMP	HONEY	0	0	3642.2193	-0.006912147	-0.060706029	0.058757586	0.017569093	-8.425013374
1822	am129	SMP	QUILT	0	0	2403.5095	0.098504185	0.043603855	-0.032201351	-0.000999512	1.359213157
1823	am131	SHF	CRAB	1	0	2458.2722	0.109855634	0.087872391	0.059734906	0.037393967	1.182751951
1824	am131	SHP	SHOVEL	1	0	3223.81	-0.122421002	0.01365834	0.086104552	0.03072391	21.84473122
1825	am131	SHP	SHEEP	1	1	2740.4836	-0.040984082	-0.015463071	0.146293696	0.014877788	15.13511234
1826	am131	SHP	SYRUP	1	0	3234.4524	0.030790136	0.132094948	0.159644772	0.054687251	17.73846495
1827	am131	SHF	ORANGE	1	0	2436.7513	-0.115891886	-0.068913048	0.093481319	0.039436699	-27.50766412
1828	am131	SHF	HAMMER	1	0	1915.1601	0.069391079	0.131648347	0.013877215	0.020425193	14.12744668
1829	am131	SHF	BONE	1	0	2346.773	0.437122209	0.166797004	0.082820354	0.027521226	5.779537624
1830	am131	SHF	VIOLIN	1	0	2252.4427	0.03452924	-0.046241541	-0.051157577	-6.96E-05	23.71330301
1831	am131	SHF	CAPE	1	1	2922.7087	0.225086962	0.277901415	0.044340233	0.001500448	-6.142420285
1832	am131	SHF	PURSE	1	0	2056.237	-0.021829193	0.121330633	-0.020487509	-0.003502772	10.61243578
1833	am131	SHP	SPOON	1	0	3049.0921	0.221211997	0.143354605	-0.106866109	-0.062077216	-17.685208
1834	am131	SHP	MOON	1	1	2685.7188	-0.089800016	-0.064465197	-0.041802302	0.02959515	-8.572375832
1835	am131	SHF	PENNY	1	0	3119.6839	0.29080772	0.212584499	0.13850583	0.054494578	12.54075986
1836	am131	SHP	SOCK	1	0	2882.9118	-0.02018245	-0.174063278	0.08500913	0.072741744	-22.22473663
1837	am131	SHF	BADGE	1	0	2480.5124	0.112090815	0.045955744	0.018596666	0.023487683	2.487482856
1838	am131	SHF	MUFFIN	1	0	2170.997	0.383859186	0.088059369	0.068688345	0.0233933	8.471316933
1839	am131	SHF	BENCH	1	1	2740.8868	0.206491322	0.085314052	0.108441732	0.05661079	8.004655997
1840	am131	SHP	TAXI	1	0	3276.2131	0.284350099	0.032705812	0.149605657	0.02653168	10.83949823
1841	am131	SHP	OYSTER	1	0	3026.8059	0.218692689	-0.014896585	0.081563508	-0.015166206	2.869505895
1842	am131	SHF	RABBIT	1	0	3043.4086	0.068533524	0.079952248	0.098736729	0.051686569	13.05213587
1843	am131	SHP	BRAIN	1	0	3184.6126	-0.161061938	-0.173928739	0.164702576	0.070484875	11.40718264
1844	am131	SHF	TURTLE	1	1	2080.3077	0.169926676	0.227255099	0.121908697	0.032129704	26.8758993
1845	am131	SHP	ENVELOPE	1	1	2792.4444	0.022822667	-0.005900196	-0.004886356	0.003959427	-5.491262893
1846	am131	SHF	CAGE	1	1	2049.7508	0.193816305	-0.155735909	0.108008965	0.040417957	8.510523726
1847	am131	SHF	DESK	1	0	2522.7896	0.019219078	-0.104405217	0.108966106	0.024870249	-19.65606577
1848	am131	SHP	CANOE	1	0	2546.9197	0.213233994	0.028578785	0.152919537	0.121880286	9.691363874
1849	am131	SHF	SWORD	1	0	1722.9919	-0.116118194	-0.0782362	0.104736013	0.047680574	-6.85966082
1850	am131	SHP	PARADE	1	0	2715.0753	0.315225422	0.115474937	0.108886744	0.047112202	9.623638827
1851	am131	SHF	FLASK	1	0	1828.1804	0.062094052	-0.021657097	0.136743538	0.030022763	13.51885443
1852	am131	SHF	HAM	1	1	2471.4294	-0.250787087	-0.04839916	0.084639525	0.033968332	15.25119282
1853	am131	SHF	MANURE	1	1	2720.1638	0.132346993	0.293345275	-0.038377864	0.01109168	7.66009632
1854	am131	SHP	BASKET	1	1	2171.8987	-0.067092088	-0.127331746	0.139326624	0.067870742	0.554801897
1855	am131	SHP	DIAMOND	1	1	2839.7758	0.337551948	0.248826211	0.129517646	0.032510216	2.342249109
1856	am131	SHF	MOTH	1	0	2169.7475	-0.018916379	0.051185898	-0.050958788	0.000479284	-3.350555881
1857	am131	SHF	MONKEY	1	1	2119.5344	0.383646134	0.217083838	0.064318369	0.027241363	14.92627906
1858	am131	SHP	LADDER	1	1	1679.9788	0.346919648	0.30425667	0.029502745	0.044290711	18.95551858
1859	am131	SHF	BROOM	1	0	3267.377	0.422013251	0.022918921	0.134735517	0.010996992	4.619063899
1860	am131	SHP	POTATO	1	0	3182.6681	-0.124686444	-0.107347228	0.009762453	0.030456819	10.19927147
1861	am131	SHP	MUSTARD	1	0	3289.8741	-0.19678484	-0.058495496	0.181163504	0.056001897	2.84383094
1862	am131	SHF	UMBRELLA	1	0	2555.5517	0.081112598	-0.054988687	0.107223132	0.059048064	-1.246928632
1863	am131	SHF	WINE	1	1	1896.9273	0.139600657	-0.023055956	0.107158776	0.033347502	19.01062408
1864	am131	SHF	PIE	1	0	3223.0478	-0.399534814	-0.169510712	0.161329074	0.04444525	27.5606451
1865	am131	SHF	WOLF	1	0	2287.0036	-0.01265732	0.043712037	0.029298988	0.03448176	-10.94811821
1866	am131	SHP	DEER	1	1	2925.9063	0.380188144	-0.031057112	0.17548938	0.058396733	10.13279545
1867	am131	SHF	HONEY	1	1	2705.87	-0.294801145	-0.110243267	0.056085682	-0.00441941	14.46500203
1868	am131	SHF	PENCIL	1	0	2658.0967	0.164187508	0.019614603	0.106610991	0.022558266	-31.26456043
1869	am131	SHP	CHERRY	1	1	2449.9864	0.123801594	-0.154323708	0.074266666	0.029166863	29.55317549
1870	am131	SHF	BANANA	1	0	2392.2135	0.134443126	0.221805922	-0.05394822	0.008157404	-12.47510062
1871	am131	SHP	CANNON	1	1	3212.7619	0.075490991	0.098562158	0.09459535	0.04651195	-19.4837893
1872	am131	SHF	CRADLE	1	0	3415.2937	-0.177774426	0.022351179	0.103539647	0.034486714	11.69056986
1873	am131	SHP	MILK	1	0	3287.2143	0.209296225	0.19923647	0.078906398	0.061735671	5.052030875
1874	am131	SHP	MUG	1	0	2616.1913	-0.266204256	-0.284125602	0.061671098	0.026932787	27.65262999
1875	am131	SHF	LIME	1	0	2915.0488	0.141575443	-0.053056277	0.076616007	0.018903574	-15.31879144
1876	am131	SHF	STAPLER	1	1	2477.5659	0.099862648	0.03902634	0.161615523	0.053897652	0.140974105
1877	am131	SHP	PYTHON	1	1	2308.2918	-0.138879915	0.051410911	0.114370216	0.040326645	25.82810127
1878	am131	SHF	COUCH	1	0	2178.5124	0.224402895	0.126192372	0.086122314	-0.013983671	-0.718668029
1879	am131	SHP	NEEDLE	1	1	1924.5881	-0.102164435	-0.043026783	0.01164503	0.047412212	-1.98409681
1880	am131	SHF	LIZARD	1	0	2852.9007	0.064321786	-0.006360471	0.10910414	0.006145099	-0.547847984
1881	am131	SHP	CIGAR	1	1	2041.2161	0.253488649	0.362381721	0.056854862	0.051659044	2.880120449
1882	am131	MF	MOUSE	0	0	1356.3596	-0.096213975	-0.014152131	0.014211828	0.020924539	-18.21142517
1883	am131	IP	MITTEN	0	1	2927.4103	0.204090961	0.325230117	0.007912325	0.0463169	-17.60421857
1884	am131	IF	FORK	0	0	3406.8724	-0.012625932	0.080104676	-0.023372338	0.027526265	2.296356672
1885	am131	MF	NET	0	0	1119.4703	0.128396878	0.03958621	0.022921261	0.038765369	-17.4308029
1886	am131	SMP	CARROT	0	0	2041.0691	0.362860882	0.145818917	0.019432645	0.013483863	5.499339037
1887	am131	SMP	TIGER	0	0	3850.7184	-0.161413837	-0.051402156	-0.050545587	-0.005183484	-16.47858696
1888	am131	SMP	QUILT	0	1	2543.9838	0.385982424	0.180591755	-0.028470684	0.003497754	8.077717237
1889	am131	SMP	LION	0	0	1926.8317	0.120745249	0.107318443	0.012337538	0.001469417	1.78165453
1890	am131	SMP	ELEPHANT	0	1	2165.7611	0.146119257	0.286795776	0.078848814	0.049573195	10.48027944
1891	am131	SMP	SCISSORS	0	0	2621.0036	-0.040142508	0.060265013	0.038785069	0.053642103	15.74934147
1892	am131	MP	TIRE	0	0	2486.5885	0.049469079	0.031123819	-0.011595376	0.019773877	7.859125606
1893	am131	SMP	PIGEON	0	0	2943.5121	-0.186474024	-0.010228835	-0.024691547	-0.004049584	-17.71091505
1894	am131	SMF	KNIFE	0	0	2453.0688	-0.022794997	5.91E-05	-0.007061817	0.00797665	-6.170988255
1895	am131	MP	GLASSES	0	0	1582.2442	-0.155153889	-0.07926832	0.021514405	0.0345678	-17.17842381
1896	am131	MP	DRUM	0	0	1892.2319	-0.069944155	0.007827814	0.030623701	0.006311804	20.25634198
1897	am131	SMP	BACON	0	0	2480.1511	-0.100686192	-0.015776597	-0.0284418	0.011161791	23.81175207
1898	am131	MF	STRING	0	0	2725.1049	0.0268126	0.269090265	-0.138881578	-0.020253574	-42.29517597
1899	am131	SMF	GOAT	0	0	2292.644	-0.181551745	-0.003571232	0.050757094	0.017628893	-32.61776412
1900	am131	IP	DOLLAR	0	0	2318.6991	-0.008112791	-0.016423735	-0.018903937	0.002055379	-4.587298434
1901	am131	IP	PLATE	0	1	3159.7794	0.016951409	0.300861198	0.052030336	0.044839769	-26.56278705
1902	am131	SMP	LOCKER	0	0	2713.386	-0.058095242	-0.081719977	0.047824374	0.018963033	-12.9484326
1903	am131	IF	CANDLE	0	0	3202.5517	-0.139821759	0.097637605	-0.119336471	0.010541028	6.401422872
1904	am131	IP	ROCKET	0	0	3017.2384	0.015643661	-0.001888961	0.107303192	0.067170096	3.938665328
1905	am131	IP	JELLY	0	1	2661.602	-0.058325913	-0.148233723	-0.027424837	-0.009164679	-5.538707492
1906	am131	SMF	BELL	0	0	3249.541	0.308566954	0.189669267	0.069669673	0.009541623	-24.54306808
1907	am131	IP	PAINTBRUSH	0	0	3743.5651	0.14516259	0.104542716	-0.055398884	-0.000675971	11.92869476
1908	am131	IF	SHOWER	0	0	3417.9653	0.055344049	0.247723266	-0.074997378	0.00763029	-25.78893683
1909	am131	MF	CHICKEN	0	0	2477.3768	-0.136287881	0.091251364	-0.036175035	0.037955789	13.62986947
1910	am131	IF	FENCE	0	0	3112.4341	-0.118955395	0.04414629	-0.070930568	0.028664661	20.88435918
1911	am131	MP	ARROW	0	0	2872.2572	-0.237586267	-0.095031057	0.047128867	0.003465059	-19.73203329
1912	am131	IP	TOAST	0	0	1993.7053	0.273168078	0.129955328	0.081254369	0.028805902	-18.03000998
1913	am131	MF	MAP	0	0	3318.4485	-0.087376768	-0.154643345	-0.105322482	0.042472963	-0.76940355
1914	am131	IP	TRACTOR	0	0	2686.3441	-0.060853487	-0.042687795	0.065138848	0.04917873	4.696920554
1915	am131	MF	CAMERA	0	0	1563.3817	-0.189051802	-0.186966778	-0.028457514	0.055500331	-5.310021134
1916	am131	MP	CASTLE	0	0	2319.6388	0.437403438	0.206263903	0.03493076	0.007193847	12.00298583
1917	am131	IP	PAIL	0	1	3393.861	-0.0485668	-0.130855086	0.00680417	4.32E-05	-22.96966489
1918	am131	IF	FAN	0	0	3743.7828	0.105742094	0.168046685	0.009275663	-0.005018011	27.31777819
1919	am131	MF	BOOT	0	0	2256.621	-0.242086798	-0.045261123	-0.054896356	0.021829887	-12.94411751
1920	am131	IF	STOOL	0	0	3186.1737	-0.206876367	-0.066030942	-0.048365894	0.004460155	20.14452877
1921	am131	IP	OMELET	0	0	3022.406	0.099604689	-0.022759513	0.024599988	0.01490141	0.080641979
1922	am131	MP	TRUMPET	0	0	1673.0602	-0.361791799	-0.277771453	0.023024037	0.006355604	-10.07780129
1923	am131	IP	COFFEE	0	0	3142.0077	-0.020780402	0.013440516	0.037067781	0.020808799	-13.31359373
1924	am131	MP	FLAG	0	0	3125.8221	0.122009043	0.084707928	0.012925764	0.014672112	-15.84397493
1925	am131	IF	NEST	0	0	3173.4264	-0.130323924	-0.022360674	-0.103260846	0.039173707	2.530507245
1926	am131	SMP	OTTER	0	0	1881.3512	-0.047760829	0.13169819	0.072125849	0.031616793	27.41256096
1927	am131	MF	TROPHY	0	0	3523.4684	0.090690784	0.078234485	-0.104378166	0.019631825	9.267759402
1928	am131	IP	HOOK	0	1	3205.6275	0.071467645	0.098742239	0.013347576	0.018836903	-5.719333155
1929	am131	IF	PILLOW	0	0	3595.1847	-0.152035417	-0.175115759	0.023377759	0.035579906	-4.779485436
1930	am131	IP	CANE	0	1	2108.4978	0.016550451	-0.103574663	-0.009510098	0.012319158	-30.61211889
1931	am131	MF	BOWL	0	1	1889.7916	0.104318295	0.063354696	0.014674215	-0.002498648	-36.35156588
1932	am131	IF	SOUP	0	0	2935.6103	-0.026210862	-0.077478309	0.096432487	0.011812713	6.972052608
1933	am131	IP	SEAL	0	0	2717.0874	0.183035534	0.053386823	0.026429576	0.029285617	-20.83347347
1934	am131	IF	TOWEL	0	0	2341.7882	0.12919503	0.034010653	-0.037053032	0.039124742	-6.318631498
1935	am131	MP	CLOCK	0	0	1492.658	0.319183347	0.112987314	-0.081796628	-0.033807633	-1.308177502
1936	am131	IF	HIGHWAY	0	1	2485.2463	-0.205882924	0.176812324	-0.160800201	0.020412173	-21.52639438
1937	am131	SMP	APPLE	0	1	2147.7099	0.34261072	0.143935557	0.014630413	0.001221862	9.709887348
1938	am132	SHF	SHEEP	1	0	3197.4234	-0.138697156	-0.013374657	-0.036168901	0.003537966	-6.018346488
1939	am132	SHF	JELLY	1	1	2214.3806	-0.035004614	0.049934104	0.040387795	0.038751649	15.81972462
1940	am132	SHP	PIE	1	0	1814.3838	3.58E-05	0.086150485	0.007142283	0.020053823	-7.00329509
1941	am132	SHF	WINE	1	0	1801.8301	0.05026031	0.104243555	0.028155411	0.03276846	-1.863268269
1942	am132	SHF	JACKET	1	0	2836.114	0.036965763	0.011524947	0.009285359	0.019165334	10.53336696
1943	am132	SHF	BACON	1	0	3270.0604	0.079431065	0.03351731	0.078468609	0.013692657	-5.629686314
1944	am132	SHP	SWORD	1	1	2704.5185	0.058212187	0.032437789	0.033869417	0.029368173	10.81566652
1945	am132	SHP	STAPLER	1	0	2192.2813	0.102103365	0.037439197	0.082573614	0.035527925	-1.440971511
1946	am132	SHP	BIBLE	1	0	2883.9118	0.144251602	0.050086233	0.015843285	0.021951389	-14.2778098
1947	am132	SHP	ORANGE	1	1	3716.0235	0.206327721	0.089781326	0.016504616	0.013690502	-1.148845939
1948	am132	SHF	SOCK	1	1	2323.7847	0.114243209	-0.038824756	0.05557183	0.032426993	-3.452804757
1949	am132	SHP	HONEY	1	0	2118.64	-0.009136264	-0.121341072	0.049295417	0.026008663	-2.470537789
1950	am132	SHF	WHIP	1	0	3029.1214	-0.030214428	0.045658559	0.048024506	0.018525844	6.803214255
1951	am132	SHF	PILLOW	1	1	2720.9244	0.116024398	0.03830925	0.035515397	0.017395121	-6.723767551
1952	am132	SHF	FAN	1	0	3103.4002	0.03338496	0.050931074	0.02060988	0.017265631	-8.153931926
1953	am132	SHP	SOAP	1	0	2440.1638	0.132630225	0.075978741	0.079134185	0.027123358	2.849856909
1954	am132	SHP	BARREL	1	0	2788.294	-0.047010785	-0.052648146	0.060372323	0.02753978	-9.771911732
1955	am132	SHF	CORN	1	1	2370.6868	0.04245507	0.024745142	0.04748639	0.030295074	17.12740262
1956	am132	SHF	BUTTER	1	0	2167.3909	-0.010051757	-0.022326538	-0.024417415	0.020152237	-8.622471318
1957	am132	SHP	TOILET	1	0	3055.6536	0.168743857	0.060022837	0.057327707	0.025889413	3.461952045
1958	am132	SHP	LOCKER	1	0	3151.1947	0.059126549	-0.02591653	0.020048941	0.012821952	-10.70617412
1959	am132	SHP	DEER	1	0	4069.1177	-0.041516592	-0.135863842	0.088535514	0.016633169	12.98070672
1960	am132	SHF	PENCIL	1	1	2841.9544	0.073637837	0.093065971	0.04246727	0.020371638	0.899312104
1961	am132	SHP	PIANO	1	0	2733.5762	0.043952319	-0.024530151	0.048954026	0.019179177	23.42811336
1962	am132	SHF	COFFEE	1	0	2451.9771	0.262543694	0.179317478	0.072659733	0.03983371	-11.51388255
1963	am132	SHF	APPLE	1	0	3889.095	-0.080939814	-0.088562521	0.011472261	0.008010542	1.224343764
1964	am132	SHP	CEREAL	1	0	3492.0622	0.001325374	-0.00888218	0.012645116	0.005465184	-5.514906348
1965	am132	SHP	TROPHY	1	0	2952.9094	0.202258294	0.121856172	0.052759466	0.0355693	8.446452437
1966	am132	SHF	PENNY	1	1	3315.1534	0.252588937	0.041953975	0.01156711	0.020995183	17.08012685
1967	am132	SHF	ROSE	1	1	2896.9429	0.283038551	-0.083388271	0.069413928	0.00956724	18.94736104
1968	am132	SHF	WOLF	1	0	3361.379	0.130576296	0.061499098	0.048359365	0.009547216	-2.43795908
1969	am132	SHF	OTTER	1	0	3479.4549	-0.069535826	0.014043206	-0.044878468	-0.000984787	5.890187315
1970	am132	SHP	MUSTARD	1	1	3304.0981	0.066321049	-0.020946543	0.078482174	0.037318622	-4.88192927
1971	am132	SHF	BADGE	1	0	3894.4847	0.02197771	-0.028358747	0.095791868	0.027627878	10.17334229
1972	am132	SHF	SCISSORS	1	0	3855.369	0.008529789	-0.070697364	-0.079734257	-0.020198874	-6.714899939
1973	am132	SHF	DOLL	1	0	2391.7862	0.162514072	-0.022144195	0.083199203	0.036325926	-0.164593313
1974	am132	SHP	BOWL	1	1	2955.9105	0.213004569	0.064469128	0.102792569	0.031252905	23.89923174
1975	am132	SHF	CANOE	1	0	3413.9242	-0.111630626	-0.0661462	0.052573573	0.023147081	-12.68891201
1976	am132	SHP	BANANA	1	1	3954.4735	0.143108032	-0.004602118	0.044722453	0.022994524	20.64963369
1977	am132	SHF	SPOON	1	0	3643.9807	-0.03958835	0.040098166	0.049855641	0.027686017	-3.155791722
1978	am132	SHP	LIME	1	1	2869.4066	-0.059607739	-0.051385419	0.04379951	0.029922704	12.60293382
1979	am132	SHF	BONE	1	0	3149.7208	0.064326902	-0.007857155	0.014216269	0.015437236	15.54028803
1980	am132	SHP	TRAY	1	1	2705.9547	0.175985154	0.089008856	0.062348097	0.023749491	6.489627698
1981	am132	SHP	LIZARD	1	1	4687.4604	0.142318683	0.094573619	0.028288057	0.024158338	-2.800862267
1982	am132	SHF	MUG	1	1	3483.7986	0.276007962	0.004173881	0.109094337	0.013383109	14.77508194
1983	am132	SHF	CLOCK	1	0	4021.1181	0.051019738	0.164960973	-0.028546681	-0.007434575	-9.345390511
1984	am132	SHP	GOAT	1	1	3973.0476	0.260065366	0.042374864	0.06323475	0.044387947	2.047482161
1985	am132	SHF	SYRUP	1	0	3979.8903	0.178966576	0.055351024	0.088095747	0.030530445	-21.80155752
1986	am132	SHP	MILK	1	1	3308.4915	0.010835026	0.05603134	0.057046869	0.034928165	24.35503962
1987	am132	SHF	TRUMPET	1	1	3931.9745	0.319419705	0.122684346	0.048179327	0.034265678	3.738860465
1988	am132	SHF	CHICKEN	1	0	4004.6364	0.192670263	0.039251629	0.014333413	0.023466069	-13.89705124
1989	am132	SHP	RABBIT	1	1	3971.3478	0.220341858	0.067639048	0.067831993	0.029530885	-1.345762658
1990	am132	SHP	BALLOON	1	1	3324.8782	0.068163508	0.072563509	0.019870484	0.016657148	12.43118296
1991	am132	SHP	NEEDLE	1	1	3665.7386	0.133969297	0.117637982	0.077017505	0.06161128	16.19004156
1992	am132	SHF	PYTHON	1	1	2916.7947	-0.147503732	-0.020779436	0.037644944	0.030779863	9.143382192
1993	am132	SHP	MUFFIN	1	0	2806.7846	0.095868474	0.206392914	0.00456896	0.031930676	-4.308144731
1994	am132	SHF	PAIL	1	0	4292.9652	0.022513092	-0.037506297	0.015962648	-0.00253685	7.866430689
1995	am132	SHP	ANCHOR	1	0	3947.5974	0.110973034	0.004785501	0.034686799	0.034574946	12.51603525
1996	am132	SHF	CAGE	1	0	3036.9384	-0.004204297	0.022072966	0.082279308	0.033621936	4.458043446
1997	am132	SHP	CRAB	1	1	3390.2987	0.104057035	0.080740161	0.103772663	0.029129547	-0.470101861
1998	am132	SHF	CARROT	1	0	2793.0446	-0.026868764	0.004353503	0.039896384	0.005512719	-8.937294474
[truncated: 7,337 more rows]
