# Supplementary material for: Hippocampal and cortical mechanisms at retrieval explain variability in episodic remembering in older adults
Source: eLife. 2020 May 29;9:e55335. doi: 10.7554/eLife.55335 (PMC7259949; doi:10.7554/eLife.55335)
Supplement: Figure 4—source data 5. [file elife-55335-fig4-data5.csv]

Subject	Trial Type	Region	Uni
am100	Assoc Hit	HC	5.855056763
am100	Assoc Miss	HC	1.132287521
am100	CR	HC	-3.614817816
am100	Item Hit	HC	4.02723228
am100	Item Miss	HC	-5.479715613
am104	Assoc Hit	HC	1.886923102
am104	Assoc Miss	HC	1.103163011
am104	CR	HC	5.234307749
am104	Item Hit	HC	-5.245662607
am104	Item Miss	HC	-1.058688118
am105	Assoc Hit	HC	5.810978113
am105	Assoc Miss	HC	-1.580526141
am105	CR	HC	1.773047917
am105	Item Hit	HC	-3.664042296
am105	Item Miss	HC	-0.419414456
am106	Assoc Hit	HC	1.158969382
am106	Assoc Miss	HC	-0.347940431
am106	CR	HC	0.380356386
am106	Item Hit	HC	-1.631620572
am106	Item Miss	HC	2.360278368
am107	Assoc Hit	HC	2.543105232
am107	Assoc Miss	HC	5.295500495
am107	CR	HC	0.708439033
am107	Item Hit	HC	3.866032583
am107	Item Miss	HC	-10.49303421
am109	Assoc Hit	HC	9.612237092
am109	Assoc Miss	HC	-3.499584181
am109	CR	HC	4.423618099
am109	Item Hit	HC	-10.0131811
am109	Item Miss	HC	1.396953227
am110	Assoc Hit	HC	7.868167859
am110	Assoc Miss	HC	1.692289862
am110	CR	HC	-5.498277712
am110	Item Hit	HC	-0.265832301
am110	Item Miss	HC	-1.876304571
am113	Assoc Hit	HC	6.580793102
am113	Assoc Miss	HC	3.988380661
am113	CR	HC	-2.141982969
am113	Item Hit	HC	-4.913683322
am113	Item Miss	HC	-1.593464338
am114	Assoc Hit	HC	9.701518086
am114	Assoc Miss	HC	-3.239208818
am114	CR	HC	-7.272489917
am114	Item Hit	HC	7.43793201
am114	Item Miss	HC	-4.707708226
am115	Assoc Hit	HC	4.303661328
am115	Assoc Miss	HC	1.758906186
am115	CR	HC	5.369084313
am115	Item Hit	HC	-9.775041731
am115	Item Miss	HC	0.263433037
am116	Assoc Hit	HC	-3.351051724
am116	Assoc Miss	HC	8.616007917
am116	CR	HC	-5.648838556
am116	Item Hit	HC	3.934946986
am116	Item Miss	HC	-1.631021486
am117	Assoc Hit	HC	8.170770346
am117	Assoc Miss	HC	-3.488595548
am117	CR	HC	-5.446567306
am117	Item Hit	HC	5.587497156
am117	Item Miss	HC	-2.903061512
am118	Assoc Hit	HC	4.888616829
am118	Assoc Miss	HC	5.977171606
am118	CR	HC	-7.444773337
am118	Item Hit	HC	2.234918654
am118	Item Miss	HC	-3.735890619
am121	Assoc Hit	HC	5.743570409
am121	Assoc Miss	HC	2.464998235
am121	CR	HC	3.48258706
am121	Item Hit	HC	-10.98076645
am121	Item Miss	HC	1.209653877
am122	Assoc Hit	HC	6.193130495
am122	Assoc Miss	HC	5.334113831
am122	CR	HC	-10.55188709
am122	Item Hit	HC	-3.530942974
am122	Item Miss	HC	4.475628867
am124	Assoc Hit	HC	4.371672097
am124	Assoc Miss	HC	-0.285513
am124	CR	HC	-1.720701526
am124	Item Hit	HC	-1.83109495
am124	Item Miss	HC	1.385680513
am125	Assoc Hit	HC	3.451650854
am125	Assoc Miss	HC	0.469718065
am125	CR	HC	-2.765883728
am125	Item Hit	HC	2.727793698
am125	Item Miss	HC	-1.963235756
am127	Assoc Hit	HC	7.239059505
am127	Assoc Miss	HC	0.813479068
am127	CR	HC	-2.793052472
am127	Item Hit	HC	0.116680549
am127	Item Miss	HC	-3.456123513
am129	Assoc Hit	HC	4.038331996
am129	Assoc Miss	HC	-1.401639864
am129	CR	HC	2.42053161
am129	Item Hit	HC	-5.742542019
am129	Item Miss	HC	2.605361414
am131	Assoc Hit	HC	7.814561533
am131	Assoc Miss	HC	2.367788798
am131	CR	HC	-1.622612306
am131	Item Hit	HC	-1.744261444
am131	Item Miss	HC	-4.895433446
am132	Assoc Hit	HC	5.470407551
am132	Assoc Miss	HC	0.751466738
am132	CR	HC	-1.637691094
am132	Item Hit	HC	-1.234194566
am132	Item Miss	HC	-1.429945496
am133	Assoc Hit	HC	3.050402475
am133	Assoc Miss	HC	1.319889854
am133	CR	HC	-0.562281037
am133	Item Hit	HC	-3.678745836
am133	Item Miss	HC	1.790777677
am134	Assoc Hit	HC	-1.398077189
am134	Assoc Miss	HC	5.892032604
am134	CR	HC	-11.28670835
am134	Item Hit	HC	2.999142778
am134	Item Miss	HC	5.713653291
am135	Assoc Hit	HC	4.513236995
am135	Assoc Miss	HC	2.113552108
am135	CR	HC	0.708423023
am135	Item Hit	HC	1.183696409
am135	Item Miss	HC	-6.598865399
am136	Assoc Hit	HC	0.790511658
am136	Assoc Miss	HC	-0.080552857
am136	CR	HC	-2.020690245
am136	Item Hit	HC	2.841888522
am136	Item Miss	HC	0.388886056
am138	Assoc Hit	HC	1.907999504
am138	Assoc Miss	HC	-2.69491567
am138	CR	HC	-3.447337854
am138	Item Hit	HC	8.435170494
am138	Item Miss	HC	-2.280873338
am139	Assoc Hit	HC	5.412752772
am139	Assoc Miss	HC	-1.311208468
am139	CR	HC	2.019765202
am139	Item Hit	HC	2.771528093
am139	Item Miss	HC	-6.972794465
am140	Assoc Hit	HC	4.116832804
am140	Assoc Miss	HC	-4.550314042
am140	CR	HC	1.130198348
am140	Item Hit	HC	3.524705838
am140	Item Miss	HC	-2.301379815
am143	Assoc Hit	HC	10.16357823
am143	Assoc Miss	HC	9.372670793
am143	CR	HC	-4.48260066
am143	Item Hit	HC	-2.599474059
am143	Item Miss	HC	-10.53413117
am145	Assoc Hit	HC	-1.287373395
am145	Assoc Miss	HC	8.174558224
am145	CR	HC	-9.428177511
am145	Item Hit	HC	1.114348863
am145	Item Miss	HC	3.346686954
am146	Assoc Hit	HC	1.190237656
am146	Assoc Miss	HC	6.35757276
am146	CR	HC	-7.91625737
am146	Item Hit	HC	7.556366548
am146	Item Miss	HC	-5.267876457
am147	Assoc Hit	HC	2.729017822
am147	Assoc Miss	HC	-0.067257393
am147	CR	HC	-4.247641487
am147	Item Hit	HC	6.419250981
am147	Item Miss	HC	-2.913326789
am148	Assoc Hit	HC	6.32303612
am148	Assoc Miss	HC	-6.229375647
am148	CR	HC	-0.858713839
am148	Item Hit	HC	6.226467171
am148	Item Miss	HC	-3.541370669
am149	Assoc Hit	HC	5.786126391
am149	Assoc Miss	HC	3.07775262
am149	CR	HC	-0.6308547
am149	Item Hit	HC	-6.512901567
am149	Item Miss	HC	0.199920391
am150	Assoc Hit	HC	6.387028993
am150	Assoc Miss	HC	5.926683428
am150	CR	HC	1.038640155
am150	Item Hit	HC	-0.712173285
am150	Item Miss	HC	-10.72013616
am152	Assoc Hit	HC	1.521706963
am152	Assoc Miss	HC	-0.783295842
am152	CR	HC	-2.329774512
am152	Item Hit	HC	4.522021001
am152	Item Miss	HC	-1.010614476
am153	Assoc Hit	HC	3.105634104
am153	Assoc Miss	HC	0.213132304
am153	CR	HC	-1.235321039
am153	Item Hit	HC	0.049841133
am153	Item Miss	HC	-0.213243365
am158	Assoc Hit	HC	7.932723266
am158	Assoc Miss	HC	-6.625611186
am158	CR	HC	4.365235194
am158	Item Hit	HC	4.136451078
am158	Item Miss	HC	-7.888755216
am161	Assoc Hit	HC	6.501773153
am161	Assoc Miss	HC	6.954849004
am161	CR	HC	-5.782795707
am161	Item Miss	HC	-6.137791943
am162	Assoc Hit	HC	2.270447883
am162	Assoc Miss	HC	1.297474997
am162	CR	HC	-1.293980858
am162	Item Hit	HC	6.845628377
am162	Item Miss	HC	-7.199527263
am163	Assoc Hit	HC	5.540272989
am163	Assoc Miss	HC	2.612266178
am163	CR	HC	-2.233966893
am163	Item Hit	HC	-0.89015356
am163	Item Miss	HC	-3.108375581
am164	Assoc Hit	HC	7.836411434
am164	Assoc Miss	HC	-1.452369768
am164	CR	HC	-2.581183243
am164	Item Hit	HC	-3.055244546
am164	Item Miss	HC	1.172429257
am166	Assoc Hit	HC	4.211362831
am166	Assoc Miss	HC	2.363395242
am166	CR	HC	-3.369466104
am166	Item Hit	HC	1.162859661
am166	Item Miss	HC	-2.448108495
am167	Assoc Hit	HC	1.215888212
am167	Assoc Miss	HC	2.535268189
am167	CR	HC	1.598493923
am167	Item Hit	HC	-7.29941921
am167	Item Miss	HC	3.869812023
am168	Assoc Hit	HC	-7.882122107
am168	Assoc Miss	HC	-12.59967547
am168	CR	HC	3.462079599
am168	Item Hit	HC	12.9870685
am168	Item Miss	HC	5.952692615
am169	Assoc Hit	HC	5.03224877
am169	Assoc Miss	HC	0.539263399
am169	CR	HC	-7.74881547
am169	Item Hit	HC	10.32279176
am169	Item Miss	HC	-6.225445326
am170	Assoc Hit	HC	3.474905474
am170	Assoc Miss	HC	12.25652622
am170	CR	HC	-8.163776386
am170	Item Hit	HC	-6.031620805
am171	Assoc Hit	HC	3.163597613
am171	Assoc Miss	HC	2.015250063
am171	CR	HC	-0.518442743
am171	Item Hit	HC	-2.708038783
am171	Item Miss	HC	-0.032323013
am172	Assoc Hit	HC	6.509107808
am172	Assoc Miss	HC	-1.110760555
am172	CR	HC	0.289795778
am172	Item Hit	HC	-2.069569555
am172	Item Miss	HC	-1.698530341
am173	Assoc Hit	HC	11.63848183
am173	Assoc Miss	HC	8.528852289
am173	CR	HC	-9.3724711
am173	Item Hit	HC	-12.64113941
am173	Item Miss	HC	3.766319523
am175	Assoc Hit	HC	5.569963068
am175	Assoc Miss	HC	7.225555393
am175	CR	HC	-2.581451417
am175	Item Hit	HC	1.193086882
am175	Item Miss	HC	-9.487110793
am176	Assoc Hit	HC	3.637714594
am176	Assoc Miss	HC	3.636035239
am176	CR	HC	5.674322144
am176	Item Hit	HC	-15.99676475
am176	Item Miss	HC	4.96873591
am177	Assoc Hit	HC	3.235751669
am177	Assoc Miss	HC	-5.591230425
am177	CR	HC	1.831083439
am177	Item Hit	HC	4.507165601
am177	Item Miss	HC	-2.06272715
am180	Assoc Hit	HC	5.78540153
am180	Assoc Miss	HC	5.173007867
am180	CR	HC	-1.6233152
am180	Item Hit	HC	2.39838171
am180	Item Miss	HC	-9.813432771
am181	Assoc Hit	HC	3.760463322
am181	Assoc Miss	HC	-1.893836194
am181	CR	HC	1.162354503
am181	Item Hit	HC	4.926659996
am181	Item Miss	HC	-6.035598494
am182	Assoc Hit	HC	-3.843131782
am182	Assoc Miss	HC	0.93075434
am182	CR	HC	1.454913469
am182	Item Hit	HC	0.906561323
am182	Item Miss	HC	2.470945786
am183	Assoc Hit	HC	1.009799885
am183	Assoc Miss	HC	0.641526402
am183	CR	HC	-2.927948787
am183	Item Hit	HC	-1.764002554
am183	Item Miss	HC	4.960668191
am184	Assoc Hit	HC	-0.15423849
am184	Assoc Miss	HC	4.699054747
am184	CR	HC	-3.443396502
am184	Item Hit	HC	-0.604182576
am184	Item Miss	HC	1.422805957
am185	Assoc Hit	HC	6.49494475
am185	Assoc Miss	HC	-4.813062914
am185	CR	HC	3.839624335
am185	Item Hit	HC	-1.12574333
am185	Item Miss	HC	-2.475719706
am186	Assoc Hit	HC	4.647551556
am186	Assoc Miss	HC	-0.037665442
am186	CR	HC	-1.608429912
am186	Item Hit	HC	4.113478927
am186	Item Miss	HC	-5.194891996
am187	Assoc Hit	HC	5.559387243
am187	Assoc Miss	HC	2.120537994
am187	CR	HC	-3.457381117
am187	Item Hit	HC	2.802719544
am187	Item Miss	HC	-5.105220529
am188	Assoc Hit	HC	12.0384686
am188	Assoc Miss	HC	3.260693587
am188	CR	HC	3.866511173
am188	Item Hit	HC	-3.765331108
am188	Item Miss	HC	-13.48029911
am189	Assoc Hit	HC	6.078486763
am189	Assoc Miss	HC	-3.013179524
am189	CR	HC	4.247405623
am189	Item Miss	HC	-5.776678353
am190	Assoc Hit	HC	-0.137929052
am190	Assoc Miss	HC	2.436504996
am190	CR	HC	2.191663613
am190	Item Hit	HC	0.401477397
am190	Item Miss	HC	-2.971673821
am191	Assoc Hit	HC	5.81692145
am191	Assoc Miss	HC	9.690893893
am191	CR	HC	1.653650718
am191	Item Hit	HC	-6.075185059
am191	Item Miss	HC	-9.166237869
am192	Assoc Hit	HC	4.874068797
am192	Assoc Miss	HC	4.886738472
am192	CR	HC	-1.292897814
am192	Item Hit	HC	-3.974240645
am192	Item Miss	HC	-2.573625674
am193	Assoc Hit	HC	5.737320501
am193	Assoc Miss	HC	0.492468425
am193	CR	HC	0.626914952
am193	Item Hit	HC	1.505315915
am193	Item Miss	HC	-6.441976657
am194	Assoc Hit	HC	3.428899999
am194	Assoc Miss	HC	2.040466798
am194	CR	HC	2.302177605
am194	Item Hit	HC	-2.553165529
am194	Item Miss	HC	-3.298335739
am195	Assoc Hit	HC	7.214866593
am195	Assoc Miss	HC	-8.490695378
am195	CR	HC	0.727044808
am195	Item Hit	HC	0.682493576
am195	Item Miss	HC	1.786333535
am196	Assoc Hit	HC	9.680618673
am196	Assoc Miss	HC	4.047352507
am196	CR	HC	-7.981403367
am196	Item Miss	HC	-4.210533306
am20	Assoc Hit	HC	5.327726549
am20	Assoc Miss	HC	2.49751827
am20	CR	HC	-21.77692214
am20	Item Hit	HC	14.65713826
am20	Item Miss	HC	1.214582197
am200	Assoc Hit	HC	-0.771669416
am200	Assoc Miss	HC	-5.555636076
am200	CR	HC	1.861800885
am200	Item Hit	HC	5.406037739
am200	Item Miss	HC	0.979510002
am202	Assoc Hit	HC	9.023466905
am202	Assoc Miss	HC	4.548468178
am202	CR	HC	-4.888641862
am202	Item Miss	HC	-7.147258712
am203	Assoc Hit	HC	-0.289419331
am203	Assoc Miss	HC	-16.44111831
am203	CR	HC	-16.83311248
am203	Item Hit	HC	32.42880957
am203	Item Miss	HC	3.054883675
am29	Assoc Hit	HC	3.978182613
am29	Assoc Miss	HC	3.645234513
am29	CR	HC	0.253902978
am29	Item Hit	HC	2.827641653
am29	Item Miss	HC	-8.784918621
am30	Assoc Hit	HC	1.943184714
am30	Assoc Miss	HC	-8.533519725
am30	CR	HC	-1.508878629
am30	Item Hit	HC	2.709920351
am30	Item Miss	HC	7.309336422
am35	Assoc Hit	HC	3.936424448
am35	Assoc Miss	HC	-0.840173616
am35	CR	HC	-1.419137456
am35	Item Hit	HC	-1.712391632
am35	Item Miss	HC	1.955321391
am36	Assoc Hit	HC	4.460635064
am36	Assoc Miss	HC	0.382131702
am36	CR	HC	-2.234429577
am36	Item Hit	HC	4.34530646
am36	Item Miss	HC	-5.033600515
am41	Assoc Hit	HC	1.111257974
am41	Assoc Miss	HC	-2.02958408
am41	CR	HC	0.862095286
am41	Item Hit	HC	6.008588341
am41	Item Miss	HC	-4.032314387
am44	Assoc Hit	HC	0.691641616
am44	Assoc Miss	HC	20.47149653
am44	CR	HC	-7.662384218
am44	Item Hit	HC	-3.925852054
am44	Item Miss	HC	-7.654858736
am45	Assoc Hit	HC	8.243248242
am45	Assoc Miss	HC	-2.197713838
am45	CR	HC	1.379577773
am45	Item Hit	HC	-1.346368799
am45	Item Miss	HC	-4.158700244
am46	Assoc Hit	HC	3.931003852
am46	Assoc Miss	HC	1.8829847
am46	CR	HC	-5.310316978
am46	Item Hit	HC	0.043952437
am46	Item Miss	HC	1.372419124
am58	Assoc Hit	HC	7.928591176
am58	Assoc Miss	HC	3.283045012
am58	CR	HC	-2.584333317
am58	Item Hit	HC	-2.104255581
am58	Item Miss	HC	-4.603004153
am60	Assoc Hit	HC	5.288438118
am60	Assoc Miss	HC	0.600441107
am60	CR	HC	-4.705115571
am60	Item Hit	HC	8.960030962
am60	Item Miss	HC	-8.223751479
am63	Assoc Hit	HC	6.273862372
am63	Assoc Miss	HC	-0.83835441
am63	CR	HC	-3.60370587
am63	Item Hit	HC	2.175630691
am63	Item Miss	HC	-2.087389649
am65	Assoc Hit	HC	9.240101912
am65	Assoc Miss	HC	4.584574664
am65	CR	HC	1.819862182
am65	Item Hit	HC	1.289294519
am65	Item Miss	HC	-15.01379014
am70	Assoc Hit	HC	1.944286988
am70	Assoc Miss	HC	-7.240343246
am70	CR	HC	-11.40858397
am70	Item Hit	HC	-5.535196234
am70	Item Miss	HC	24.1598796
am73	Assoc Hit	HC	6.178529873
am73	Assoc Miss	HC	3.824677197
am73	CR	HC	-4.928710369
am73	Item Hit	HC	-3.187372125
am73	Item Miss	HC	0.032918561
am77	Assoc Hit	HC	-1.921238912
am77	Assoc Miss	HC	2.725235197
am77	CR	HC	-4.858287238
am77	Item Hit	HC	0.940057693
am77	Item Miss	HC	5.034276396
am78	Assoc Hit	HC	5.951670004
am78	Assoc Miss	HC	7.614010557
am78	CR	HC	-3.367400719
am78	Item Hit	HC	-1.018449844
am78	Item Miss	HC	-7.259786861
am80	Assoc Hit	HC	4.867764046
am80	Assoc Miss	HC	16.77680187
am80	CR	HC	-5.05143459
am80	Item Hit	HC	-8.079256669
am80	Item Miss	HC	-6.593831522
am84	Assoc Hit	HC	7.132727923
am84	Assoc Miss	HC	4.491870344
am84	CR	HC	-7.144161486
am84	Item Hit	HC	-2.333204473
am84	Item Miss	HC	-0.227189173
am85	Assoc Hit	HC	-6.63375063
am85	Assoc Miss	HC	-1.999537943
am85	CR	HC	-0.062534261
am85	Item Hit	HC	6.825189128
am85	Item Miss	HC	3.790676842
am90	Assoc Hit	HC	2.740861611
am90	Assoc Miss	HC	7.762622127
am90	CR	HC	-0.461732705
am90	Item Miss	HC	-8.505716524
am93	Assoc Hit	HC	4.653281243
am93	Assoc Miss	HC	3.377178609
am93	CR	HC	-1.681189507
am93	Item Hit	HC	-1.362637591
am93	Item Miss	HC	-3.066589618
am94	Assoc Hit	HC	1.257618365
am94	Assoc Miss	HC	-2.136396359
am94	CR	HC	-0.308726464
am94	Item Hit	HC	8.478281933
am94	Item Miss	HC	-5.37073434
am95	Assoc Hit	HC	4.845271806
am95	CR	HC	-4.077254553
am96	Assoc Hit	HC	-2.302967707
am96	Assoc Miss	HC	5.21305365
am96	CR	HC	-10.54942048
am96	Item Hit	HC	15.56320298
am96	Item Miss	HC	-6.003825312
am97	Assoc Hit	HC	9.925674845
am97	Assoc Miss	HC	-2.980613099
am97	CR	HC	-0.690669227
am97	Item Hit	HC	2.247999804
am97	Item Miss	HC	-6.582349189
am98	Assoc Hit	HC	1.916016186
am98	Assoc Miss	HC	1.074713635
am98	CR	HC	-0.494403401
am98	Item Hit	HC	0.025348884
am98	Item Miss	HC	-0.601632167
