# Supplementary material for: Hippocampal and cortical mechanisms at retrieval explain variability in episodic remembering in older adults
Source: eLife. 2020 May 29;9:e55335. doi: 10.7554/eLife.55335 (PMC7259949; doi:10.7554/eLife.55335)
Supplement: Figure 5—source data 1. [file elife-55335-fig5-data1.csv]

Subject	age	gender	yrs_educ	associative_dprime	exemplar_specific_recall	oldnew_dprime	delayed_recall_comp	AH.CR_HC	Logit_VTC_x	Logit_VTC_y	Logit_ANG_x	Logit_ANG_y	WE.WC_ANG	WC.BC_ANG	WE.WC_VTC	WC.BC_VTC	mean_motion_x	mean_motion_y
am100	62	Female	16	2.131351315	0.395833333	3.137781126	1.019938556	9.469874579	7.142323941	2.088034411	2.886879106	2.130199525	0.00091889	0.018175211	0.022670324	0.020478101	0.094119623	0.108898301
am104	76	Female	12	0.932796821	0.041666667	1.624309989	-0.533142792	-3.347384647	5.07639353	0.42868144	2.605544827	0.23325079	0.003770904	-0.004822321	0.003391307	-0.002987948	0.127484733	0.104037558
am105	69	Male	18	1.483703864	0.041666667	1.931964196	-0.811356742	4.037930196	5.546857671	1.155419961	2.224851888	0.886521285	0.014226022	0.006675983	-0.010157095	0.009456474	0.086910991	0.106399025
am106	61	Female	20	1.231949549	0.208333333	1.949350744	1.166439559	0.778612996	5.168020843	1.062816286	4.927976883	2.409610665	-0.005033837	0.021458672	0.022186605	0.003308638	0.134365533	0.128379737
am107	63	Male	18	0.932796821	0.083333333	1.718953201	-0.686163904	1.8346662	5.601471926	-0.036858475	2.395721911	0.326398395	-0.000522446	-9.08E-05	0.008970648	-0.000871551	0.06439271	0.067503398
am109	73	Female	16	1.651953588	0.233333333	1.861257314	-0.46505157	5.188618992	4.906360822	0.8083297	2.506097673	1.833004209	-0.007420439	0.010518221	0.000317894	0.002861186	0.178173763	0.08138475
am110	65	Male	18	1.447072298	0.358333333	1.905357954	0.775770216	13.36644557	5.105564217	1.083805151	3.449883508	3.453054966	0.022815008	0.026765352	0.019111874	0.006622436	0.113207321	0.108657859
am113	61	Female	16	2.733394628	0.433333333	3.238001683	0.517839126	8.722776071	6.174639064	0.939145004	3.937455003	2.232863056	0.021595507	0.020470421	0.008552453	0.008120333	0.061927586	0.062961536
am114	63	Female	20	3.130911877	0.683333333	3.679532237	1.117605892	16.974008	7.474684011	1.816451234	4.808780447	2.520864842	0.010537957	0.031349007	0.011223869	0.024239734	0.093512434	0.09995279
am115	73	Female	12	0.956453879	0.216666667	2.163659469	0.218619781	-1.065422985	4.587434217	1.016012144	2.462548578	2.019296943	0.011606654	0.00676392	0.005305711	0.00441217	0.190570697	0.141020968
am116	68	Female	16	2.835323944	0.3	2.270986857	-0.228428644	2.297786832	5.033715694	0.453860358	1.56164616	0.808832366	0.02539082	-0.000859816	0.015245973	0.004129631	0.129555493	0.121021973
am117	68	Female	16	2.307691625	0.533333333	2.66368276	1.166439559	13.61733765	5.963726015	1.748383681	3.62060902	2.464570505	-0.008093663	0.031172784	-0.01904449	0.021696289	0.115980499	0.102634573
am118	77	Male	18	1.873534182	0.383333333	2.460499788	0.64405727	12.33339017	3.913949972	1.844344506	3.201024174	2.639698708	-0.005032655	0.01704944	-0.010972764	0.009622195	0.096557849	0.082406693
am121	65	Female	16	1.553498847	0.183333333	2.081520412	0.762007465	2.260983349	4.678615023	0.636696964	3.31825616	1.001355851	-0.00738018	0.002354899	0.00942126	0.001727043	0.060761632	0.066743189
am122	64	Female	20	2.156782229	0.525	2.536167536	0.92227122	16.74501758	6.457319374	1.991234205	5.652986148	2.601548191	0.00915969	0.035528847	0.007136838	0.013846239	0.091716025	0.102549897
am124	74	Male	16	2.016580713	0.158333333	1.592229046	0.713173797	6.092373623	4.24293509	0.961594118	4.703422367	3.04227562	-0.001946676	0.031497233	-0.020503673	0.003566745	0.081566894	0.078905245
am125	68	Female	16	1.702141344	0.15	1.983354515	0.127169782	6.217534582	5.448555699	0.657804944	2.710468169	1.268799877	9.49E-05	0.01012866	-0.002810338	0.004444371	0.046201507	0.050001864
am127	68	Male	20	0.798229096	0.05	1.639980192	-0.966125694	10.03211198	5.732622115	0.144083821	2.749200457	2.010803607	-0.02602146	0.016664086	-0.042139776	-0.010916672	0.051641193	0.050872522
am129	80	Male	19	-0.278837251	0.016666667	0.890416252	-1.500522895	1.617800386	5.185851573	0.298269	3.313240795	1.004593746	0.02509963	0.009112672	0.008533178	0.005504244	0.144222281	0.144578213
am131	69	Female	18	2.141198121	0.275	2.35719894	0.093124171	9.437173839	6.84395104	0.964897222	6.099036036	3.111990772	0.000771651	0.033554599	0.004072069	0.010173989	0.124428266	0.128508318
am132	61	Male	17	1.764463203	0.3	2.749566247	0.239625175	7.108098646	6.516221819	1.556470366	3.760693483	2.668304638	0.03820332	0.021656316	0.004712341	0.011103963	0.062346273	0.065229666
am133	62	Female	16	0.73190342	0.15	1.591800693	-0.227403339	3.612683512	7.195005106	0.77495224	5.127978145	1.898510801	0.02913676	0.016614237	0.00512661	0.009242707	0.042018525	0.052270725
am134	71	Female	16	-0.097650771	0	0.943158893	-0.407949953	9.888631161	5.532681662	-0.61897269	3.664763186	0.298555539	-0.030663712	0.000525218	0.000316568	-0.003899698	0.088610542	0.098519556
am135	60	Female	16	2.457114321	0.433333333	2.168414385	1.019938556	3.804813973	6.223400636	1.082107538	4.678197801	1.784958113	0.024256456	0.004573362	0.014739737	0.004340888	0.100407792	0.092075047
am136	68	Female	18	1.329601291	0.241666667	1.942963517	0.32352976	2.811201904	6.438273269	1.171991556	4.577171301	1.562583739	0.005273562	0.011506141	0.013969812	0.010485989	0.059877201	0.05486901
am138	71	Female	19	1.546268615	0.391666667	2.235338315	-1.327218924	5.355337359	6.22909556	1.817750565	3.118123981	2.23313731	-0.00104342	0.019325758	-0.029585126	0.012427041	0.200754563	0.200188181
am139	75	Female	18	2.087639728	0.008333333	1.961052119	-0.31752526	3.39298757	6.042205005	0.078327085	2.831615638	0.77555574	0.012579455	0.006895894	-0.018417964	-0.001365394	0.135040398	0.145700446
am140	70	Female	20	0.568121523	0.091666667	0.861676811	-1.034216916	2.986634455	5.282076842	0.395163032	3.36942324	1.133087379	0.016016806	0.004658155	0.030774348	0.001177726	0.083696551	0.097150515
am143	68	Female	16	2.478967231	0.641666667	2.460499788	1.019938556	14.64617889	5.303165285	1.35131015	4.766931817	2.424344926	0.006971853	0.022393171	0.000126397	0.005706602	0.069255222	0.068043226
am145	68	Male	18	2.121477126	0.458333333	2.10660885	0.163266005	8.140804116	6.816115369	0.924908251	4.852291187	2.949736155	0.011912467	0.032214188	0.012528979	0.006266525	0.059148202	0.067337222
am146	76	Female	16	1.008203362	0.25	1.226665719	0.162240699	9.106495026	5.051436643	0.194397018	6.000460974	1.789576485	0.01480987	0.024544251	0.00135252	-0.002586708	0.089749915	0.10469281
am147	74	Male	16	2.590945559	0.275	2.66368276	-0.212615282	6.976659309	4.201982198	0.931617516	4.491248234	1.735509981	-0.012715024	0.012058044	-0.002588604	0.002327969	0.0764986	0.074190617
am148	61	Female	12	1.468757245	0.166666667	2.070478741	0.05907856	7.181749959	5.987909116	0.163982405	3.51238053	1.28142607	-0.001819918	0.006669365	0.005376724	0.001932158	0.077200864	0.066853667
am149	60	Female	16	1.462440658	0.2	1.986779089	-0.478814321	6.416981091	5.751865018	1.896685752	3.520598573	1.879017653	-0.012460753	0.033981355	0.005357607	0.015426956	0.100819634	0.079846895
am150	66	Female	18	2.553616097	0.566666667	3.35131924	-0.498071875	5.348388838	7.430090155	1.799207707	5.085248703	2.882853441	0.041173438	0.051206927	0.018698974	0.02268324	0.070711026	0.069888821
am152	66	Male	18	1.176453087	0.233333333	1.503933298	0.294978951	3.851481475	5.01300617	1.42145626	2.935749901	1.334732324	0.004748169	0.007859399	0.002529836	0.008072026	0.101014954	0.112867396
am153	63	Female	16	1.593008699	0.558333333	2.115239283	-0.129736003	4.340955143	6.646671706	1.350608527	4.42678838	2.065361782	0.021473948	0.028026229	0.00783988	0.013654961	0.121832812	0.144529371
am158	75	Female	12	2.157949383	0.229166667	2.574941329	0.046341115	3.567488072	6.561230577	0.593377233	4.680555972	1.651993742	0.012433556	0.00911406	0.010729069	0.000622578	0.100474919	0.130473123
am161	65	Male	16	1.462440658	0.558333333	1.778918522	-0.456783621	12.28456886	5.806422859	0.805623685	5.093183242	1.587296408	0.006224349	0.012654693	-3.80E-05	0.003527155	0.067742405	0.062901055
am162	62	Male	18	0.866583716	0.375	1.447948807	-0.371131196	3.564428741	5.673963022	1.294319927	4.034719371	2.162299075	0.023899448	0.014838123	0.009071689	-0.001426663	0.099896123	0.090587269
am163	64	Male	20	1.528929189	0.239583333	2.392718128	0.343812619	7.774239882	5.26958666	0.836914883	0.93462012	1.125739967	-0.008752226	0.007856948	-0.006379531	0.007641087	0.047489952	0.049606024
am164	62	Female	20	1.933345407	0.3	2.553616097	1.019938556	10.41759468	6.152095058	1.219916403	3.84964217	1.388243179	0.010717367	0.00895367	0.008918105	0.006642835	0.091054526	0.077408938
am166	62	Male	18	2.017812746	0.35	2.685179109	-0.114947946	7.580828936	3.986642482	0.928964585	4.390669818	2.252559613	0.011827293	0.021166207	0.000943313	0.004736529	0.081252712	0.080677154
am167	73	Male	16	1.132025428	0	1.64777645	-1.568614117	-0.38260571	3.659208875	0.110635201	2.93756861	0.64033962	-0.044658535	0.000415897	0.004249854	-0.004580087	0.134646701	0.121501503
am168	70	Female	20	1.673392858	0.375	2.01042488	0.64405727	-11.34420171	5.489519718	1.391992252	5.066055116	2.651142038	0.013437437	0.029051051	0.015006836	0.012143085	0.130364128	0.163480898
am169	75	Male	20	0.92524456	0.191666667	1.26301367	-0.914518881	12.78106424	4.728518556	0.375695737	3.087950108	0.956470221	-0.020954062	0.006344158	0.001849062	0.009348751	0.140254008	0.124456516
am170	60	Male	17	3.925465888	0.841666667	4.782268178	0.735435444	11.63868186	5.125646161	0.867179577	4.710745633	3.324530515	-0.003266807	0.035853413	-0.000790823	0.00585528	0.058767547	0.057518196
am171	60	Female	16	1.968431452	0.325	2.576558534	0.2812162	3.682040356	6.322416045	1.112028747	3.434452597	2.662624968	0.052933027	0.033515952	0.018211613	0.014142819	0.079794305	0.083475583
am172	71	Female	16	1.366484472	0.066666667	1.730884651	0.12167498	6.219312031	5.824003772	0.724768401	1.998995317	0.341676259	0.013595841	0.004069958	-0.011298447	0.004139506	0.169795493	0.163260381
am173	62	Female	16	2.508531532	0.510416667	2.910275406	1.215273227	21.01095294	5.535799976	1.385432973	3.48810945	1.378061691	0.019029445	0.015559386	0.025563883	0.010434344	0.130775591	0.127071985
am175	63	Male	14	2.037432528	0.483333333	1.754744816	-0.502844143	8.151414486	4.835138819	1.795690464	2.747723411	1.573926311	-0.044216868	0.012672129	-0.005688695	0.013477111	0.097149763	0.118282758
am176	72	Male	18	1.593207899	0.358333333	2.418287571	-0.303762509	-2.03660755	2.672417583	0.343971661	2.249336855	0.632417901	0.022806788	0.025727667	-0.00517822	0.008997737	0.265554561	0.268912028
am177	74	Male	18	0.695360442	0.008333333	1.532888186	0.595223602	1.40466823	4.712317652	0.400632238	3.657517365	0.154785716	0.046367924	-0.002700874	0.024813983	0.000580334	0.103810619	0.116816495
am180	65	Female	18	2.182641854	0.125	2.068747193	0.434959847	7.408716729	6.876653144	1.416953705	3.530517697	2.122088741	-0.013704499	0.045257128	-0.014550989	0.015390383	0.180132701	0.158139012
am181	64	Female	18	1.173935786	0.483333333	1.591800693	0.80534633	2.59810882	3.599408832	1.1646482	2.070412829	0.662311094	-0.002615893	0.003961704	0.012401918	0.004884318	0.186618153	0.217233808
am182	76	Female	16	2.233543035	0.3	2.535060627	-1.102308138	-5.298045251	2.569830902	0.574491951	3.516502445	1.08124773	-0.012154704	0.007502074	-0.036906145	-0.005338442	0.17539721	0.183467639
am183	69	Female	18	2.148603656	0.516666667	2.390458817	1.019938556	3.937748673	5.297123906	0.355724889	3.958421057	-0.294708725	-0.004238619	-0.001536248	-0.003845781	0.002666041	0.105519293	0.102012695
am184	65	Male	16	1.691450683	0.208333333	1.932534375	0.247170589	3.289158011	2.943377627	0.335116158	1.753474001	0.484137091	0.01394111	-0.003213247	0.007717679	0.002325404	0.140329291	0.135052124
am185	64	Female	18	1.848234543	0.375	2.460499788	0.957342137	2.655320416	5.627372903	0.787665246	3.397168328	1.106646357	-0.00394939	0.013481193	0.008128831	0.003169653	0.087646077	0.090381705
am186	69	Male	16	2.065054342	0.316666667	2.346654606	-1.104358749	6.255981468	4.461169352	1.369114143	1.822906418	1.173467657	-0.012537116	0.009178447	-0.026168452	0.008392908	0.113440844	0.107744637
am187	64	Female	16	2.464540696	0.458333333	2.711079728	1.132393948	9.01676836	6.103270054	1.459326365	1.456180238	0.884768779	0.011393449	0.000871416	0.004065454	0.008151009	0.111345513	0.096654891
am188	63	Female	16	2.43541126	0.425	2.424851245	0.566672793	8.171957426	6.518362983	1.576128842	3.546525977	2.200217028	-0.023280877	0.018351523	-0.019193339	0.022412835	0.125611131	0.142329118
am189	75	Female	16	2.235338315	0.341666667	2.995499898	-1.290400167	1.831081142	4.339457687	0.640917966	3.134497894	2.169053371	-0.003690506	0.025403022	0.002013067	0.002993192	0.154028988	0.146681975
am190	62	Female	18	1.577738808	0.15	1.700459529	-0.587471262	-2.329592665	7.063271617	1.123639902	5.012125395	1.100066449	-0.055822573	0.017799848	-0.033997733	0.014332677	0.063108338	0.061953505
am191	67	Female	18	1.879234263	0.366666667	2.472563299	0.692890937	4.163270732	5.531394377	0.932188966	3.232661748	1.60835863	0.009970891	0.020723983	-0.023215619	0.009055062	0.093295453	0.07816614
am192	72	Male	12	1.145310152	0.258333333	1.49564741	0.142983145	6.166966611	5.971460724	0.831966007	3.942396378	1.552274885	0.01503959	0.002417207	-0.001401724	0.002918862	0.113649956	0.108116696
am193	66	Female	16	1.494204107	0.183333333	1.731760819	0.937059277	5.110405549	5.354625366	1.023375206	4.367635375	1.855690964	0.030118801	0.028148263	0.018540739	0.004912789	0.24041586	0.248966646
am194	70	Male	18	1.167325583	0.075	2.025803287	-0.602259319	1.126722394	6.174013903	1.247969763	4.466730245	1.756278707	-0.010868676	0.016452925	-0.000572132	0.011173672	0.056550119	0.061770458
am195	65	Male	14	1.729087645	0.225	2.143464259	0.442433437	6.487821785	3.358319517	1.020813016	3.805222751	2.45961149	0.025207318	0.010621652	-0.000950741	0.000707584	0.073793219	0.078931566
am196	65	Female	20	1.424608727		1.983354515	0.294978951	17.66202204	1.817378159	0.348709815	1.5397999	1.100282976	-0.002556729	0.004766067	-0.004090004	0.002196544	0.261128546	0.227319737
am20	75	Female	18	2.708884512	0.458333333	3.097652	0.504076374	27.10464869	5.581961888	0.806068986	2.27310074	1.059417756	0.04337206	0.001705853	0.009790158	-0.000201387	0.106272802	0.10870389
am200	60	Female	18	1.320062518	0.085365854	1.746720629	0.365843319	-2.6334703	4.014563399	0.842208179	2.385206737	0.462132479	-0.003241257	0.004263142	0.015059923	0.003006112	0.098985042	0.117924318
am202	60	Female	18	2.073700645	0.366666667	2.685179109	0.170508648	13.91210877	5.600967602	0.974013626	2.855483421	1.708813399	0.036402	0.018362865	0.024388067	0.009417319	0.109538004	0.105000491
am203	62	Female	18	2.945041206	0.525	2.497548623	0.183548864	16.54369314	4.411698733	0.921358655	3.650107812	1.666580452	-0.009553579	0.022725821	-0.018820226	0.005827628	0.187156527	0.149186473
am29	75	Male	16	2.133486732	0.183333333	2.878917309	0.504076374	3.724279631	2.809907452	0.739712475	2.482251477	0.889944743	-0.014112954	0.007982646	-0.015979912	0.002149003	0.20192158	0.198619916
am30	66	Male	16	0.567947087	0.008333333	1.46177096	-1.459957176	3.452063342	4.686023487	0.662190494	3.279792471	1.3618554	0.040313556	0.010227328	0.01058309	0.004549985	0.075339132	0.065418872
am35	68	Female	15	1.062975951	0.108333333	1.729087645	0.308741703	5.355561904	4.211703395	0.05644274	2.422317426	0.528372441	-0.004750169	0.009400652	0.00824208	-0.001931495	0.100721501	0.103738106
am36	64	Male	18	2.758265805	0.525	3.200952848	0.616531767	6.695064641	5.51594149	1.047102843	3.338814555	2.278139814	-0.003038416	0.01597522	0.018623215	0.003293116	0.078374243	0.081199177
am41	65	Male	16	0.362321103	0.066666667	1.209042769	-0.184064473	0.249162688	6.682112214	1.036245562	5.390435203	1.79672649	0.014596101	0.01611068	0.019969095	0.006532195	0.08888474	0.090529916
am44	64	Female	18	2.058239319	0.358333333	3.317011594	0.951847334	8.354025833	6.686393043	1.236634142	3.642139203	1.134384162	0.062509444	0.001851408	0.03234296	0.001020046	0.105079261	0.111874859
am45	81	Female	15	1.078131647	0.008333333	1.262937699	0.415702293	6.86367047	6.515579412	0.483650183	3.71238817	1.66276898	0.0095637	0.012292822	-0.011329964	0.005770808	0.061731409	0.063280774
am46	67	Male	14	1.170860944	0.05	1.89682968	-0.964377854	9.241320826	5.072427849	0.971010001	1.967400425	1.002841166	0.026665799	-0.007046369	0.023209126	-0.013271468	0.144285165	0.165818598
am58	70	Male	18	1.825281921	0.2	2.553616097	0.448722598	10.51292449	6.211533429	1.587122386	5.565436607	2.332423953	0.048837232	0.028138511	0.011491142	0.006214279	0.070149377	0.076323774
am60	82	Male	20	1.593207899	0.225	1.959090726	0.629269213	9.993553689	6.455164393	1.043704228	3.516594467	1.495669606	0.013388589	0.010995326	0.005535111	0.008732381	0.060591439	0.054864717
am63	63	Female	18	1.421462479	0.575	1.398769063	0.790558273	9.877568242	7.414124458	1.47344353	5.08785342	1.968736786	0.007216167	0.022824103	0.00851504	0.01364564	0.071455444	0.06909043
am65	64	Female	16	1.483879928	0.216666667	1.889934198	-0.344328228	7.42023973	6.191599153	0.814154761	4.019417688	2.569476142	-0.005291668	0.031045212	0.012046907	0.009129666	0.148015281	0.144354943
am70	66	Female	16	1.598509742	0.683333333	1.223907732	0.470030763	13.35287096	7.220718098	2.051810382	5.980958661	3.715044227	0.001107267	0.056055573	0.0054548	0.02943097	0.10165309	0.089681295
am73	75	Male	18	0.601939144	0.1	1.69062163	0.435985152	11.10724024	5.91760744	0.459902361	4.306702056	1.716546233	0.009594195	0.015529986	0.002721714	0.006973302	0.12508417	0.108429247
am77	77	Male	18	0.405877074	0.008333333	1.137272408	-1.361264535	2.937048326	4.173434778	0.170313503	2.412249163	0.79116832	-0.010768632	6.96E-05	-0.008594166	0.000337273	0.168428839	0.122226171
am78	68	Female	16	1.447072298	0.5625	1.759222353	0.937059277	9.319070722	3.848233207	1.017378929	2.716020966	1.255813301	0.026348094	0.00747845	0.028501566	0.004148571	0.122677346	0.088203631
am80	70	Female	16	2.381429675	0.425	2.553616097	1.019938556	9.919198636	5.243080468	1.112313982	4.975635646	4.079823309	0.016337346	0.054810337	0.030923041	0.000532859	0.123317676	0.10322208
am84	62	Male	16	2.945041206	0.758333333	3.35131924	0.087629369	14.27688941	6.452471977	1.782661266	5.285205368	2.294754355	0.032253558	0.024380067	0.010595631	0.017925934	0.074185157	0.069076696
am85	69	Male	18	-0.002011512	0.008333333	1.094866182	-0.150018862	-6.571216369	5.672725313	0.356952013	2.613849594	0.885318283	-0.001029593	0.005413797	0.011704021	-0.005518337	0.138842683	0.105483015
am90	74	Female	16	1.072967897	0.316666667	1.818398475	0.406409038	3.202594316	6.739383777	0.850612578	3.8556301	1.776194389	0.038156436	0.016875157	0.009978728	0.006751884	0.115069424	0.146636824
am93	67	Male	16	1.213208129	0.266666667	1.155128677	-0.276237006	6.33447075	5.775525922	0.877639975	2.96113711	1.579133501	0.001112525	0.007632197	0.018620895	0.006584815	0.070701055	0.070055665
am94	73	Female	14	1.827687179	0.116666667	2.460499788	0.044290504	1.566344829	6.452027832	0.662231277	4.539724942	1.033808363	0.000521258	0.008995795	-0.008729585	0.002004199	0.058335009	0.072118447
am95	74	Male	18	1.338557192	0.725	1.338557192	1.264106895	8.922526358	5.638663256	1.094135214	3.283256056	2.313869917	-0.001222756	0.015176753	-0.011232443	0.00649603	0.11406997	0.108418727
am96	78	Female	16	0.294213139	0.125	1.19844397	-2.00159702	8.246452775	5.077920252	0.232304309	2.610343998	1.159824673	-0.000706	0.008776887	-0.008449562	0.000780437	0.098245103	0.068658716
am97	72	Female	12	1.684021252	0.375	2.418287571	-0.416217902	10.61634407	5.187842707	0.294157862	1.716989696	0.99491183	0.001776012	0.002722616	-0.007285164	0.000729067	0.081672485	0.076195841
am98	67	Female	16	2.349861867	0.275	2.720452337	0.776795522	2.410419587	5.299735199	0.858015263	3.893294144	2.268310833	0.018380962	0.019045464	0.00967029	0.001961413	0.114229736	0.114642961
