# Supplementary material for: Hippocampal and cortical mechanisms at retrieval explain variability in episodic remembering in older adults
Source: eLife. 2020 May 29;9:e55335. doi: 10.7554/eLife.55335 (PMC7259949; doi:10.7554/eLife.55335)
Supplement: Table 1—source data 1. [file elife-55335-table1-data1.csv]

Subject	age	gender	yrs_educ	mmse	associative_dprime	exemplar_specific_recall	overall_dprime	delayed_recall_comp	HVLT_delayed	BVMT_delayed	LogicalMem_delayed
am100	62	Female	16	30	2.131351315	0.395833333	3.137781126	1.019938556	12	12	38
am104	76	Female	12	29	0.932796821	0.041666667	1.624309989	-0.533142792	10	7	30
am105	69	Male	18	30	1.483703864	0.041666667	1.931964196	-0.811356742	9	7	28
am106	61	Female	20	30	1.231949549	0.208333333	1.949350744	1.166439559	12	12	41
am107	63	Male	18	30	0.932796821	0.083333333	1.718953201	-0.686163904	9	9	24
am109	73	Female	16	29	1.651953588	0.233333333	1.861257314	-0.46505157	12	7	24
am110	65	Male	18	30	1.447072298	0.358333333	1.905357954	0.775770216	12	12	33
am113	61	Female	16	30	2.733394628	0.433333333	3.238001683	0.517839126	12	11	31
am114	63	Female	20	30	3.130911877	0.683333333	3.679532237	1.117605892	12	12	40
am115	73	Female	12	30	0.956453879	0.216666667	2.163659469	0.218619781	12	7	38
am116	68	Female	16	30	2.835323944	0.3	2.270986857	-0.228428644	12	10	19
am117	68	Female	16	28	2.307691625	0.533333333	2.66368276	1.166439559	12	12	41
am118	77	Male	18	28	1.873534182	0.383333333	2.460499788	0.64405727	11	12	34
am121	65	Female	16	30	1.553498847	0.183333333	2.081520412	0.762007465	12	11	36
am122	64	Female	20	29	2.156782229	0.525	2.536167536	0.92227122	12	12	36
am124	74	Male	16	30	2.016580713	0.158333333	1.592229046	0.713173797	12	11	35
am125	68	Female	16	29	1.702141344	0.15	1.983354515	0.127169782	12	11	23
am127	68	Male	20	26	0.798229096	0.05	1.639980192	-0.966125694	11	5	24
am129	80	Male	19	28	-0.278837251	0.016666667	0.890416252	-1.500522895	7	8	18
am131	69	Female	18	28	2.141198121	0.275	2.35719894	0.093124171	11	11	26
am132	61	Male	17	30	1.764463203	0.3	2.749566247	0.239625175	11	11	29
am133	62	Female	16	30	0.73190342	0.15	1.591800693	-0.227403339	11	9	26
am134	71	Female	16	29	-0.097650771	0	0.943158893	-0.407949953	10	9	26
am135	60	Female	16	29	2.457114321	0.433333333	2.168414385	1.019938556	12	12	38
am136	68	Female	18	30	1.329601291	0.241666667	1.942963517	0.32352976	11	10	34
am138	71	Female	19	28	1.546268615	0.391666667	2.235338315	-1.327218924	9	5	24
am139	75	Female	18	29	2.087639728	0.008333333	1.961052119	-0.31752526	11	6	34
am140	70	Female	20	29	0.568121523	0.091666667	0.861676811	-1.034216916	9	5	30
am143	68	Female	16	28	2.478967231	0.641666667	2.460499788	1.019938556	12	12	38
am145	68	Male	18	30	2.121477126	0.458333333	2.10660885	0.163266005	11	9	34
am146	76	Female	16	28	1.008203362	0.25	1.226665719	0.162240699	12	10	27
am147	74	Male	16	30	2.590945559	0.275	2.66368276	-0.212615282	10	9	30
am148	61	Female	12	29	1.468757245	0.166666667	2.070478741	0.05907856	10	11	29
am149	60	Female	16	28	1.462440658	0.2	1.986779089	-0.478814321	12	6	27
am150	66	Female	18	29	2.553616097	0.566666667	3.35131924	-0.498071875	10	6	34
am152	66	Male	18	28	1.176453087	0.233333333	1.503933298	0.294978951	12	9	33
am153	63	Female	16	29	1.593008699	0.558333333	2.115239283	-0.129736003	11	9	28
am158	75	Female	12	30	2.157949383	0.229166667	2.574941329	0.046341115	9	9	39
am161	65	Male	16	28	1.462440658	0.558333333	1.778918522	-0.456783621	10	9	25
am162	62	Male	18	30	0.866583716	0.375	1.447948807	-0.371131196	7	12	28
am163	64	Male	20	29	1.528929189	0.239583333	2.392718128	0.343812619	12	9	34
am164	62	Female	20	30	1.933345407	0.3	2.553616097	1.019938556	12	12	38
am166	62	Male	18	28	2.017812746	0.35	2.685179109	-0.114947946	10	9	32
am167	73	Male	16	28	1.132025428	0	1.64777645	-1.568614117	5	8	24
am168	70	Female	20	30	1.673392858	0.375	2.01042488	0.64405727	11	12	34
am169	75	Male	20	30	0.92524456	0.191666667	1.26301367	-0.914518881	7	8	30
am170	60	Male	17	29	3.925465888	0.841666667	4.782268178	0.735435444		12	34
am171	60	Female	16	30	1.968431452	0.325	2.576558534	0.2812162	12	8	36
am172	71	Female	16	29	1.366484472	0.066666667	1.730884651	0.12167498	10	12	27
am173	62	Female	16	28	2.508531532	0.510416667	2.910275406	1.215273227	12	12	42
am175	63	Male	14	30	2.037432528	0.483333333	1.754744816	-0.502844143	6	12	29
am176	72	Male	18	30	1.593207899	0.358333333	2.418287571	-0.303762509	11	7	31
am177	74	Male	18	27	0.695360442	0.008333333	1.532888186	0.595223602	11	12	33
am180	65	Female	18	28	2.182641854	0.125	2.068747193	0.434959847	11	11	33
am181	64	Female	18	30	1.173935786	0.483333333	1.591800693	0.80534633	10	12	41
am182	76	Female	16	29	2.233543035	0.3	2.535060627	-1.102308138	7	5	36
am183	69	Female	18	30	2.148603656	0.516666667	2.390458817	1.019938556	12	12	38
am184	65	Male	16	30	1.691450683	0.208333333	1.932534375	0.247170589	11	8	39
am185	64	Female	18	30	1.848234543	0.375	2.460499788	0.957342137	12	11	40
am186	69	Male	16	30	2.065054342	0.316666667	2.346654606	-1.104358749	9	7	22
am187	64	Female	16	30	2.464540696	0.458333333	2.711079728	1.132393948	11	12	44
am188	63	Female	16	29	2.43541126	0.425	2.424851245	0.566672793	12	11	32
am189	75	Female	16	29	2.235338315	0.341666667	2.995499898	-1.290400167	6	8	26
am190	62	Female	18	28	1.577738808	0.15	1.700459529	-0.587471262	8	8	33
am191	67	Female	18	28	1.879234263	0.366666667	2.472563299	0.692890937	11	12	35
am192	72	Male	12	29	1.145310152	0.258333333	1.49564741	0.142983145	10	10	34
am193	66	Female	16	30	1.494204107	0.183333333	1.731760819	0.937059277	11	12	40
am194	70	Male	18	29	1.167325583	0.075	2.025803287	-0.602259319	9	8	29
am195	65	Male	14	28	1.729087645	0.225	2.143464259	0.442433437		12	30
am196	65	Female	20	29	1.424608727		1.983354515	0.294978951	12	9	33
am20	75	Female	18	30	2.708884512	0.458333333	3.097652	0.504076374	12	10	34
am200	60	Female	18	29	1.320062518	0.085365854	1.746720629	0.365843319	10	12	32
am202	60	Female	18	29	2.073700645	0.366666667	2.685179109	0.170508648	10	12	28
am203	62	Female	18	29	2.945041206	0.525	2.497548623	0.183548864	12	8	34
am29	75	Male	16	29	2.133486732	0.183333333	2.878917309	0.504076374	12	10	34
am30	66	Male	16	28	0.567947087	0.008333333	1.46177096	-1.459957176	9	6	18
am35	68	Female	15	30	1.062975951	0.108333333	1.729087645	0.308741703	12	10	30
am36	64	Male	18	30	2.758265805	0.525	3.200952848	0.616531767	11	10	40
am41	65	Male	16	29	0.362321103	0.066666667	1.209042769	-0.184064473	9	10	31
am44	64	Female	18	30	2.058239319	0.358333333	3.317011594	0.951847334	10	12	44
am45	81	Female	15	29	1.078131647	0.008333333	1.262937699	0.415702293	9	11	40
am46	67	Male	14	27	1.170860944	0.05	1.89682968	-0.964377854	8	9	22
am58	70	Male	18	30	1.825281921	0.2	2.553616097	0.448722598	11	12	30
am60	82	Male	20	28	1.593207899	0.225	1.959090726	0.629269213	12	12	30
am63	63	Female	18	29	1.421462479	0.575	1.398769063	0.790558273	11	12	37
am65	64	Female	16	29	1.483879928	0.216666667	1.889934198	-0.344328228	9	9	31
am70	66	Female	16	30	1.598509742	0.683333333	1.223907732	0.470030763	11	10	37
am73	75	Male	18	29	0.601939144	0.1	1.69062163	0.435985152	10	10	40
am77	77	Male	18	30	0.405877074	0.008333333	1.137272408	-1.361264535	8	5	27
am78	68	Female	16	28	1.447072298	0.5625	1.759222353	0.937059277	11	12	40
am80	70	Female	16	30	2.381429675	0.425	2.553616097	1.019938556	12	12	38
am84	62	Male	16	29	2.945041206	0.758333333	3.35131924	0.087629369	9	12	30
am85	69	Male	18	30	-0.002011512	0.008333333	1.094866182	-0.150018862	10	10	28
am90	74	Female	16	29	1.072967897	0.316666667	1.818398475	0.406409038	12	10	32
am93	67	Male	16	29	1.213208129	0.266666667	1.155128677	-0.276237006	11	9	25
am94	73	Female	14	28	1.827687179	0.116666667	2.460499788	0.044290504	11	11	25
am95	74	Male	18	29	1.338557192	0.725	1.338557192	1.264106895	12	12	43
am96	78	Female	16	27	0.294213139	0.125	1.19844397	-2.00159702	6	6	18
am97	72	Female	12	29	1.684021252	0.375	2.418287571	-0.416217902	12	7	25
am98	67	Female	16	29	2.349861867	0.275	2.720452337	0.776795522	11	11	40
